# Supplementary material for: PAX5 is part of a functional transcription factor network targeted in lymphoid leukemia
Source: PubMed Central journal article supplement (PMC6695195; doi:10.1371/journal.pgen.1008280), 2019-08-05

Figure S5A

### Pax5 expression

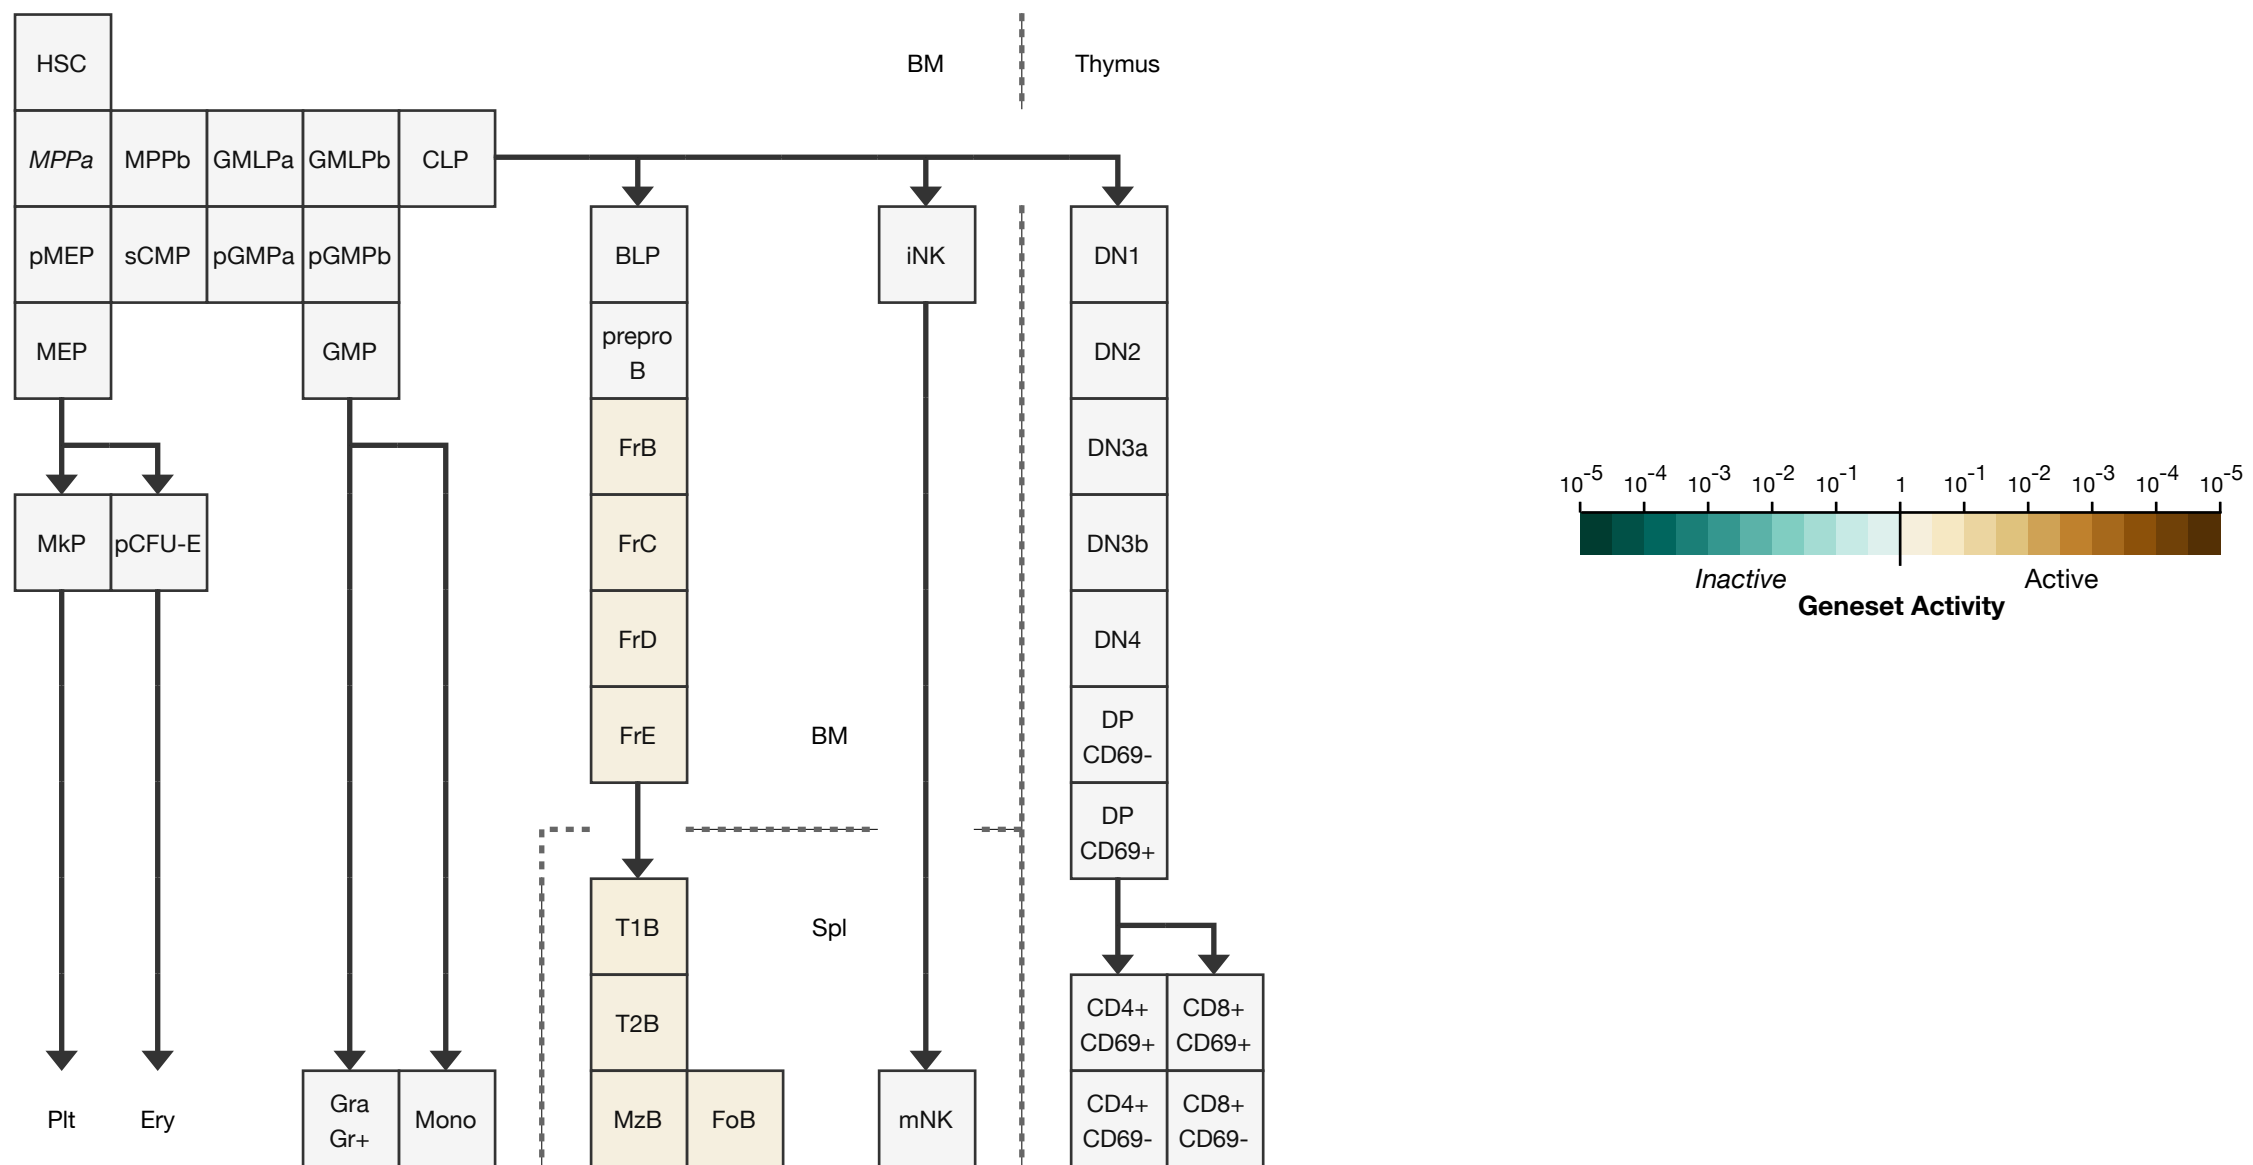

### IKZF1 expression

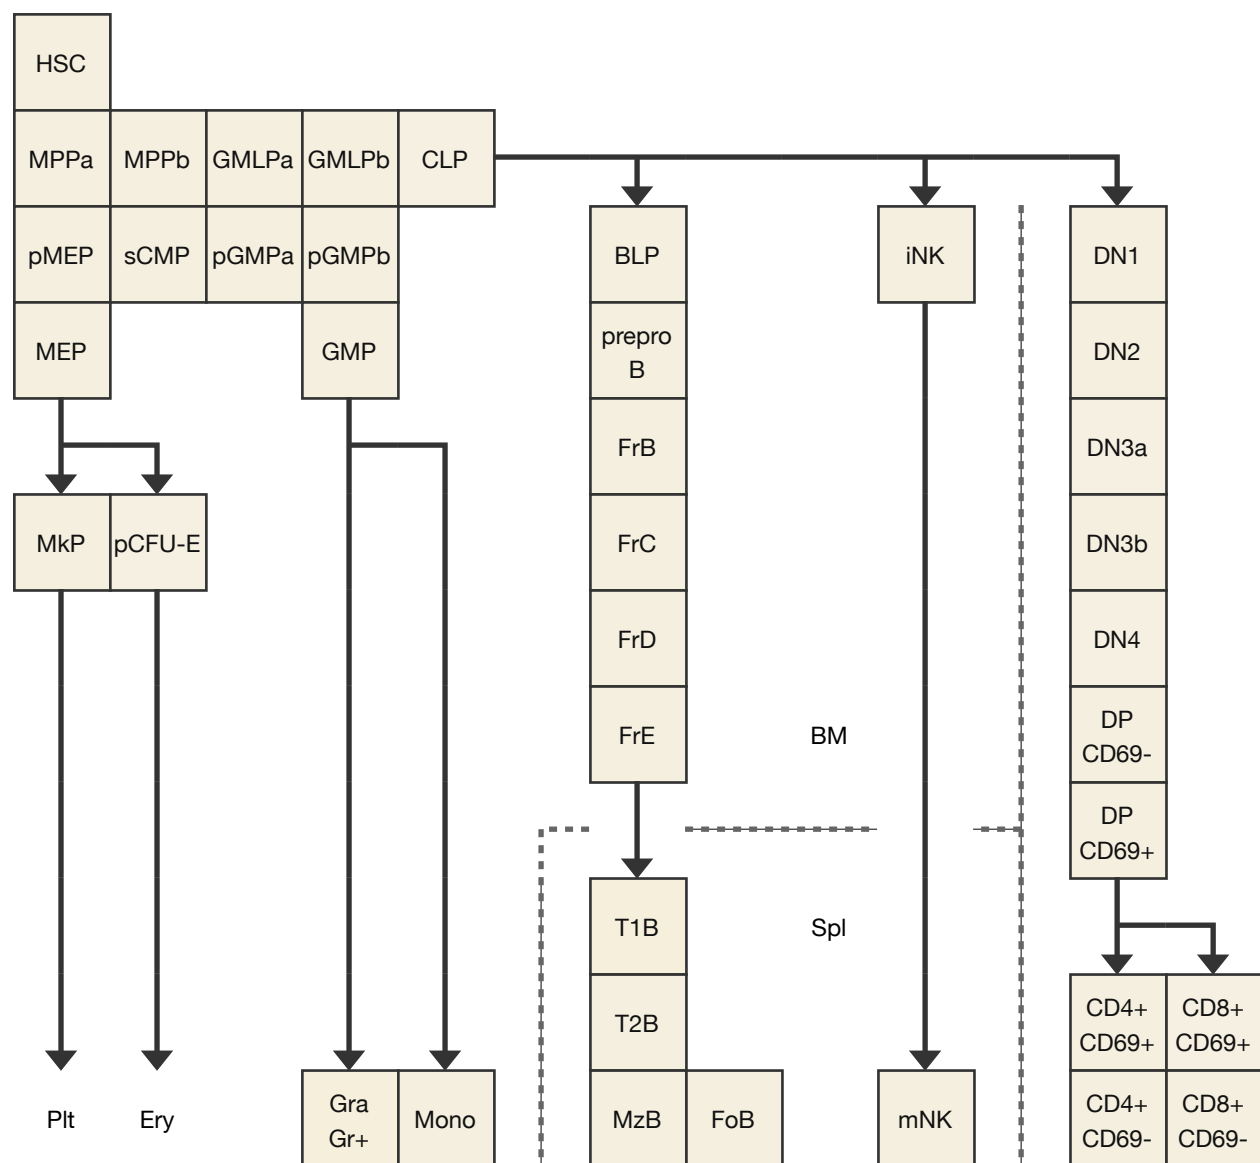

### Runx1 expression

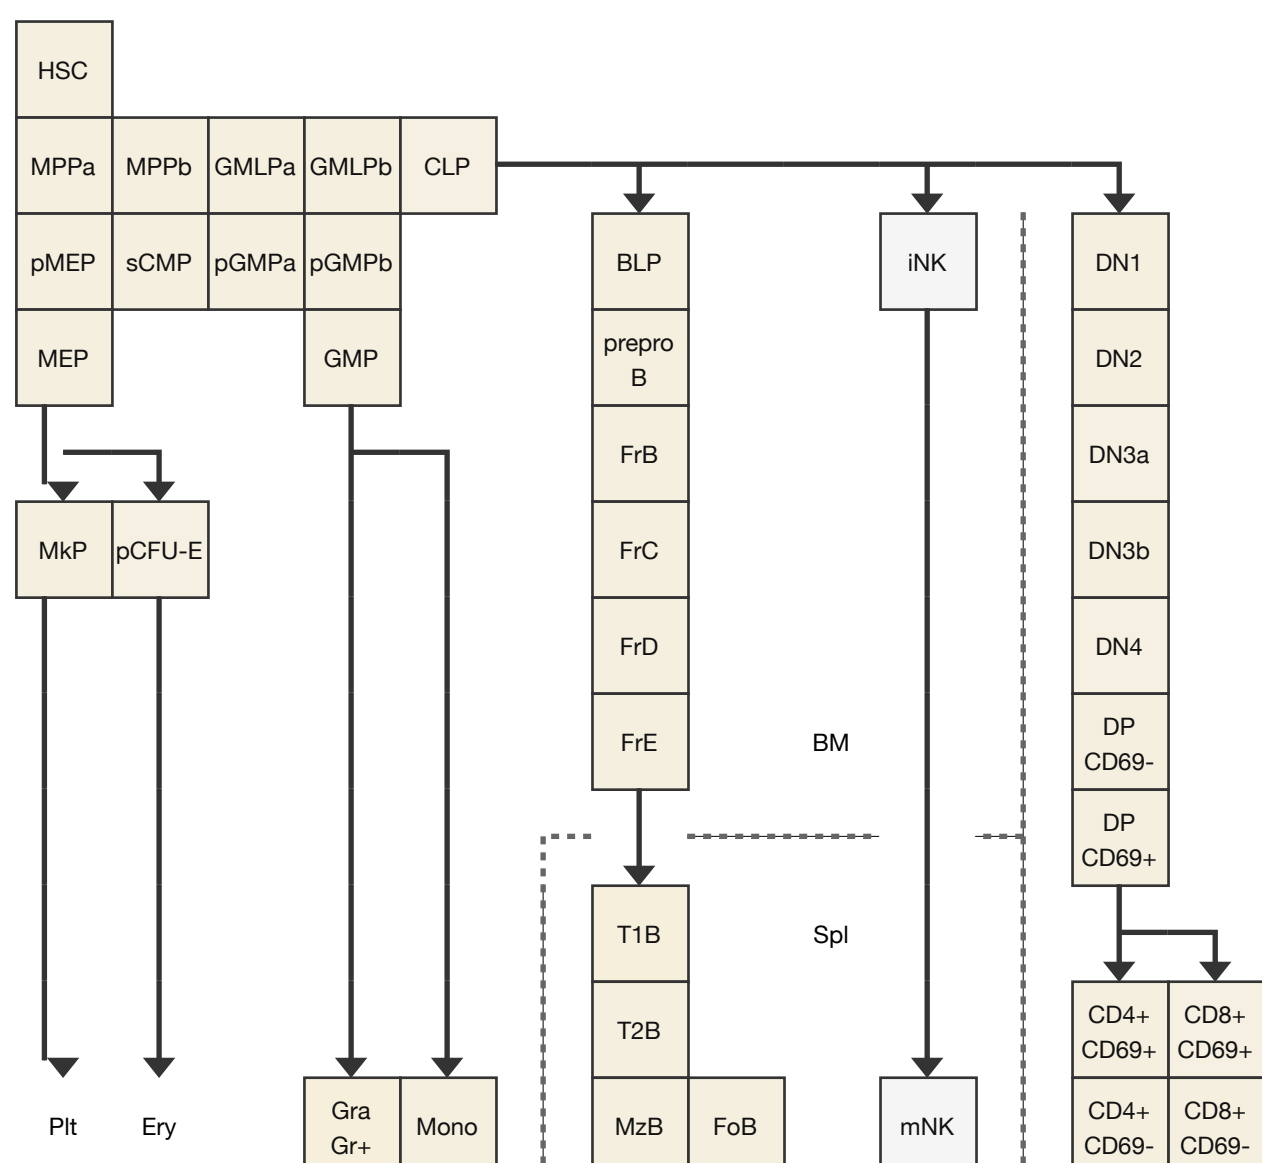

Figure S5B

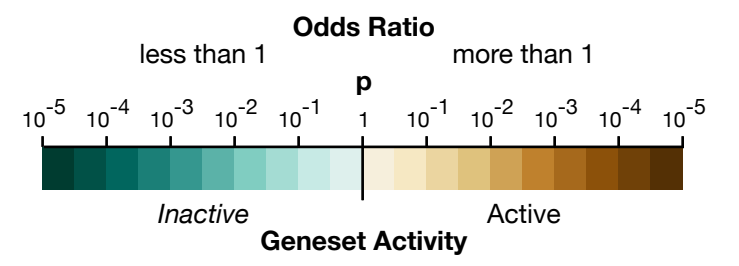

**PAX5 targets B-cells geneset**

Blk, Ebf, CD19, VpreB1, Igl11, CD79a

**Pax5 unique sites geneset**

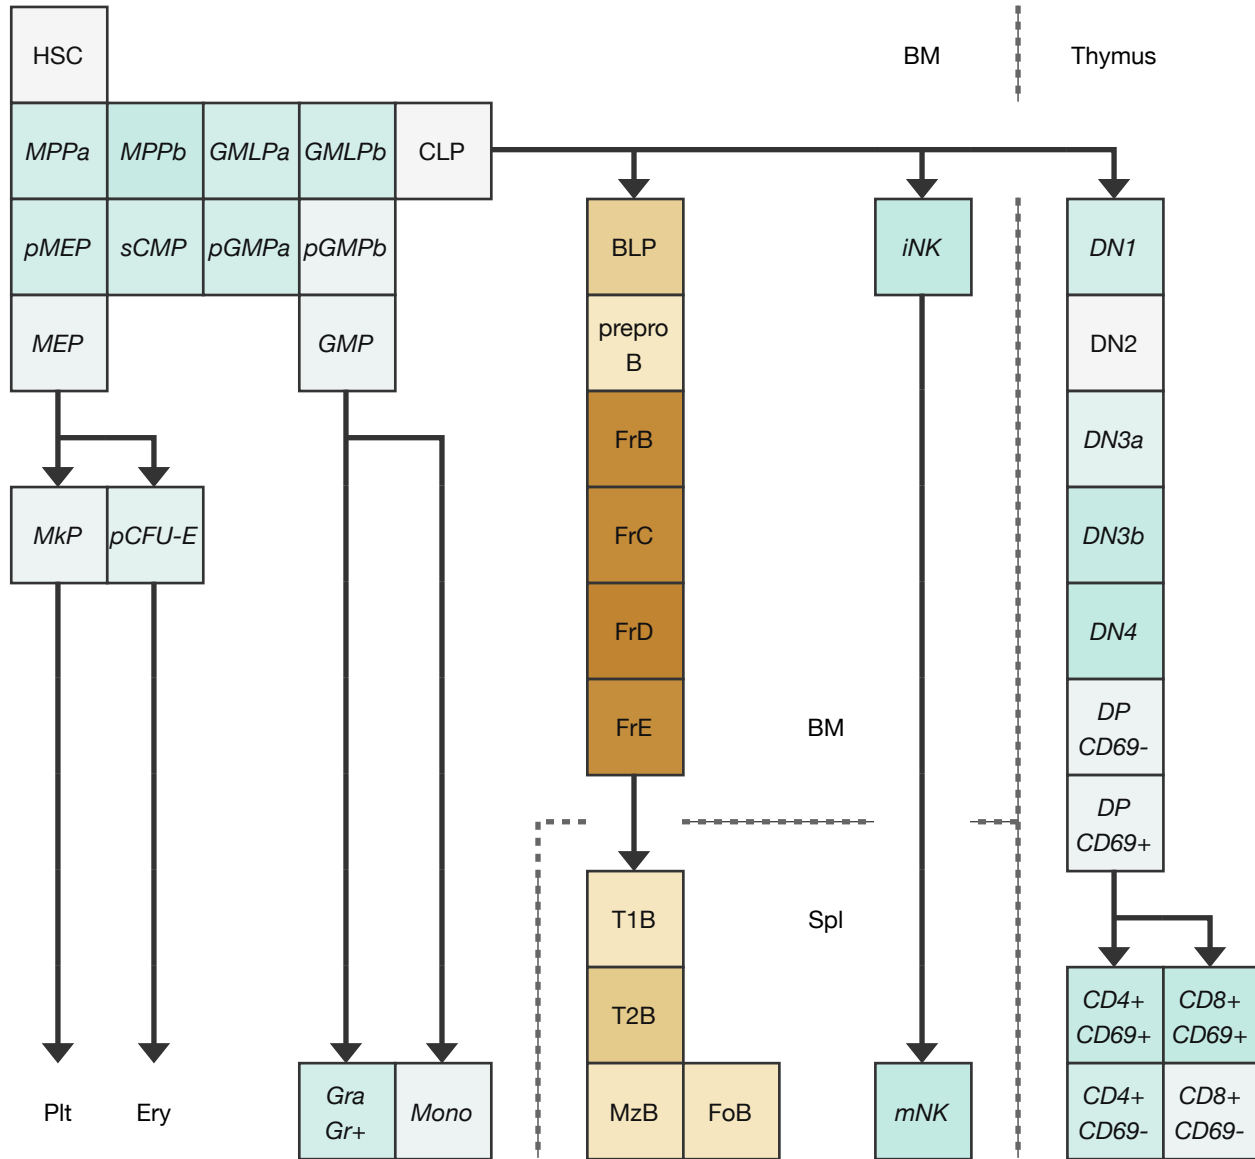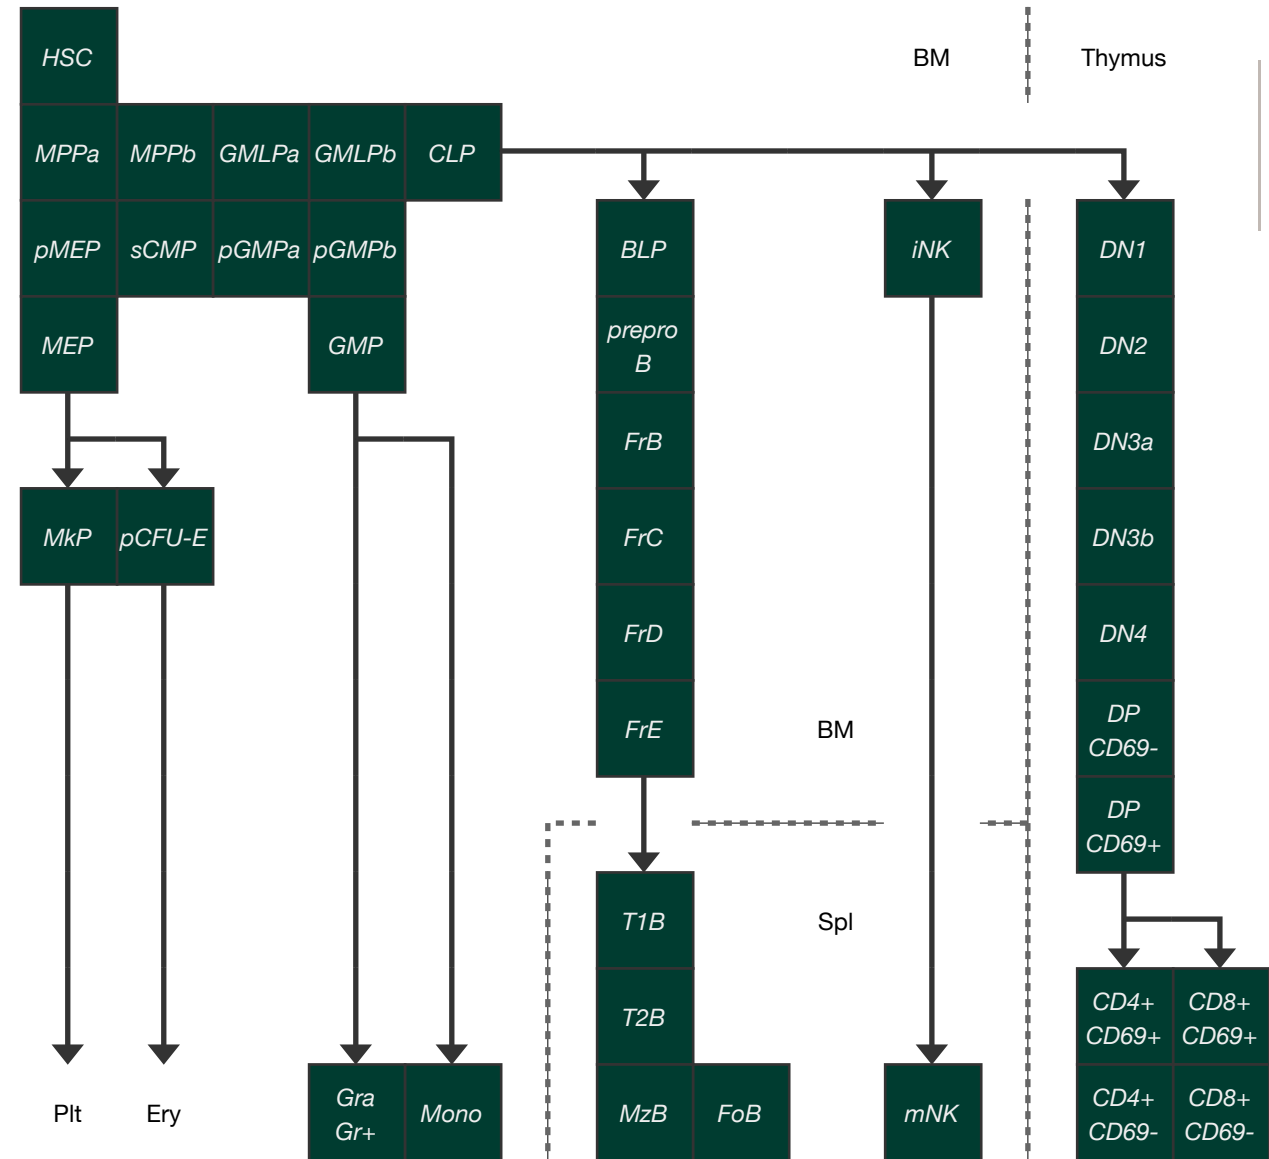

**Runx1 unique sites geneset**

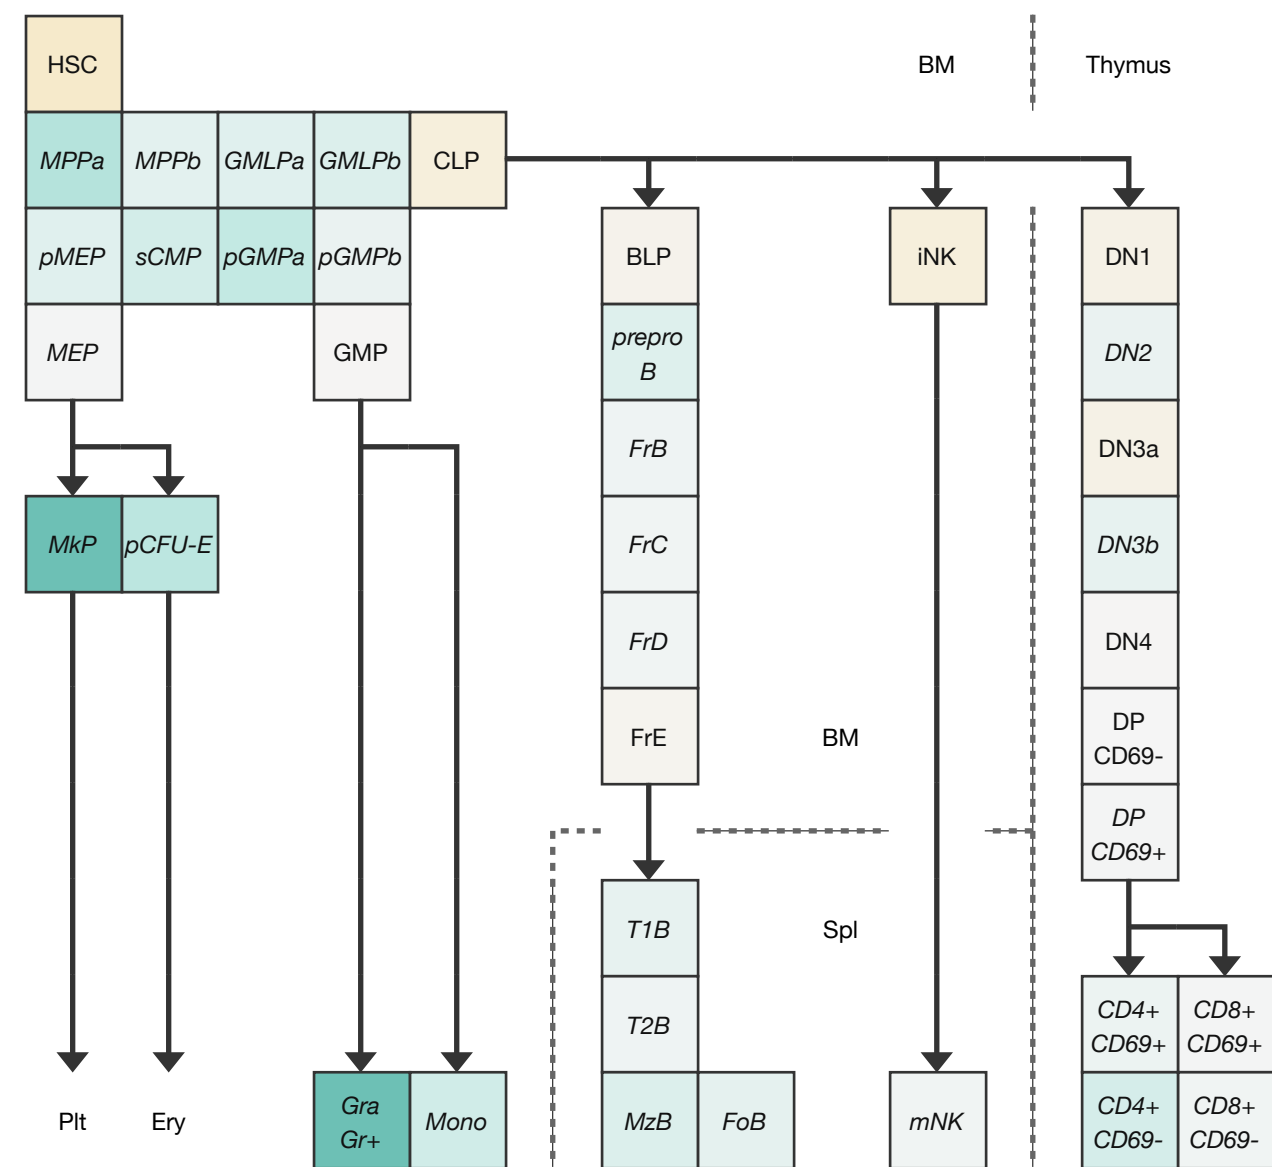

**Akrf1 unique sites geneset**

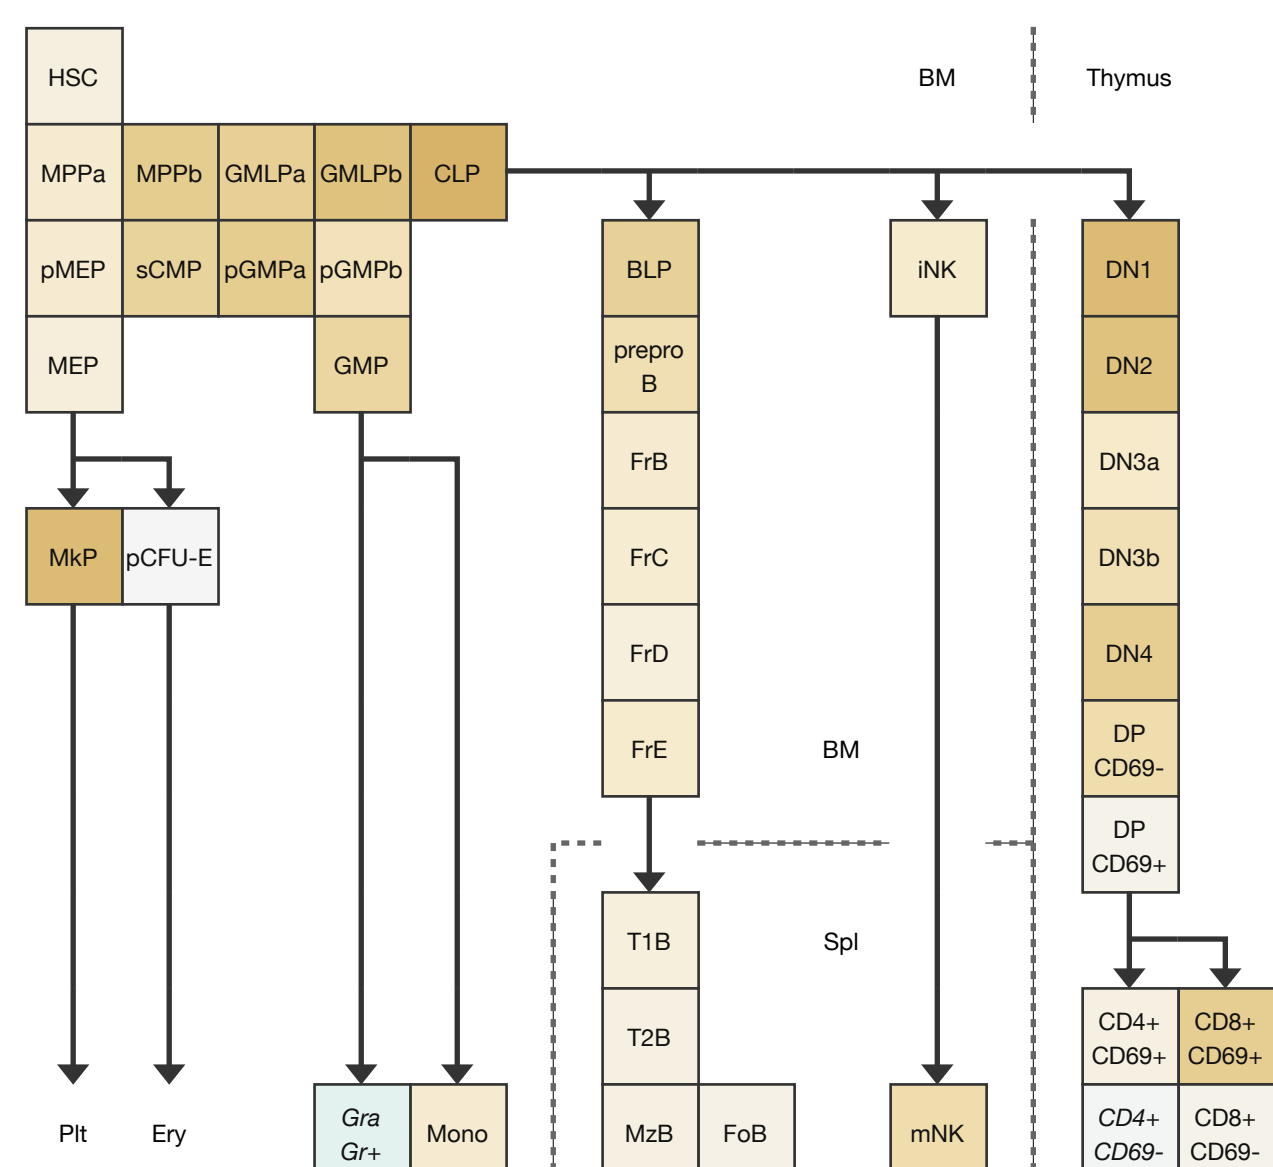

Figure S5C

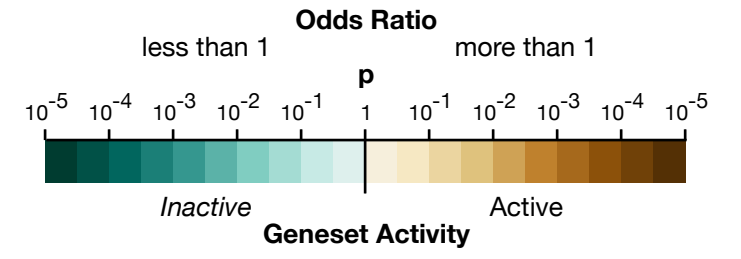

**Pax5/Runx unique sites geneset**

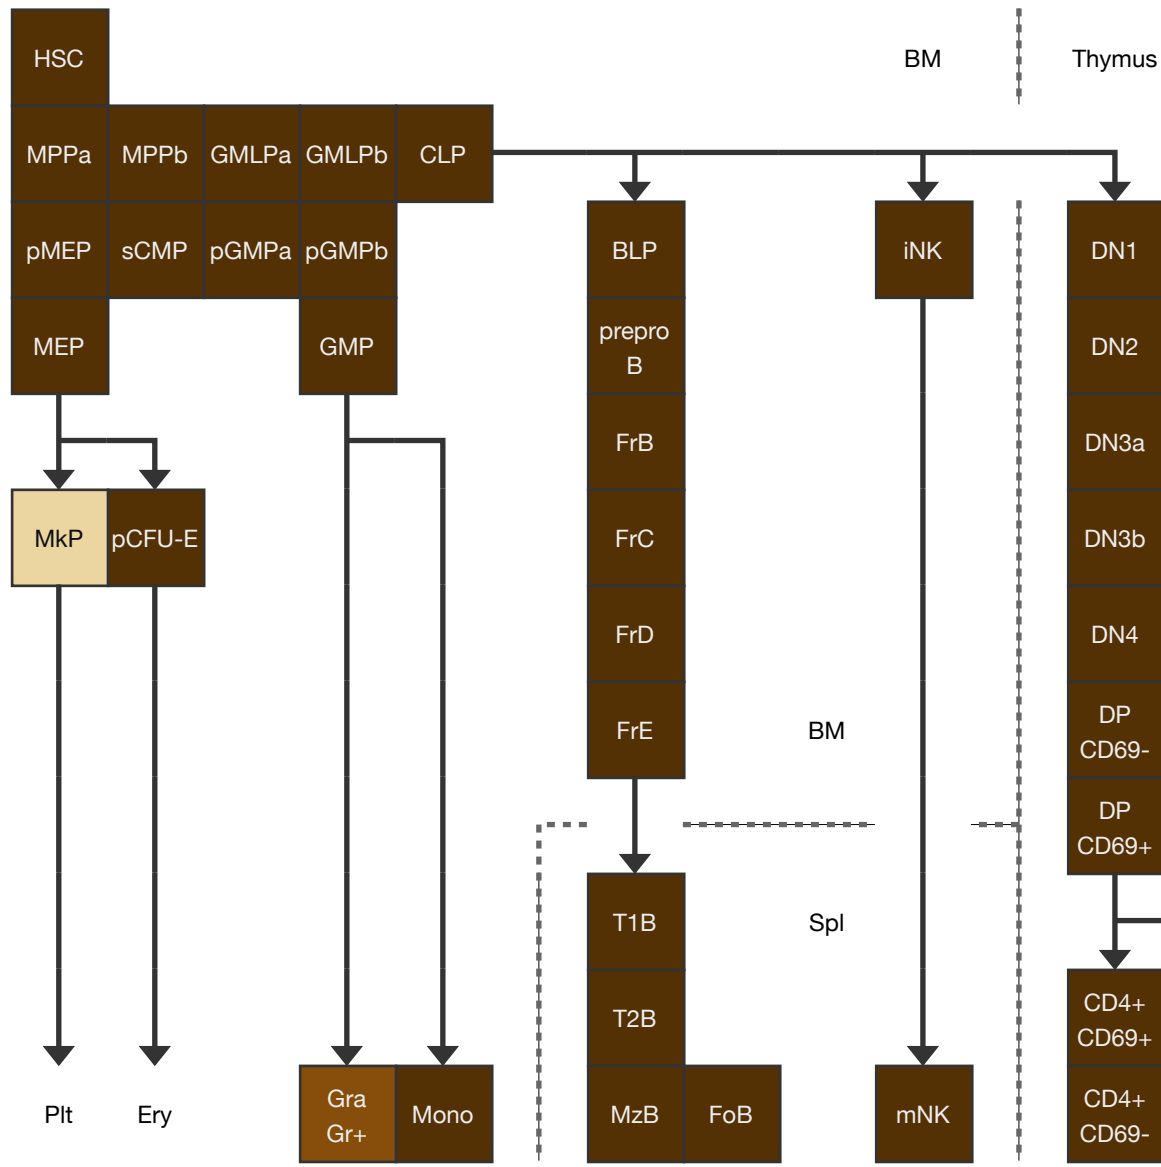

**PYp5' Fd) nf a m] 'ka] k geneset**

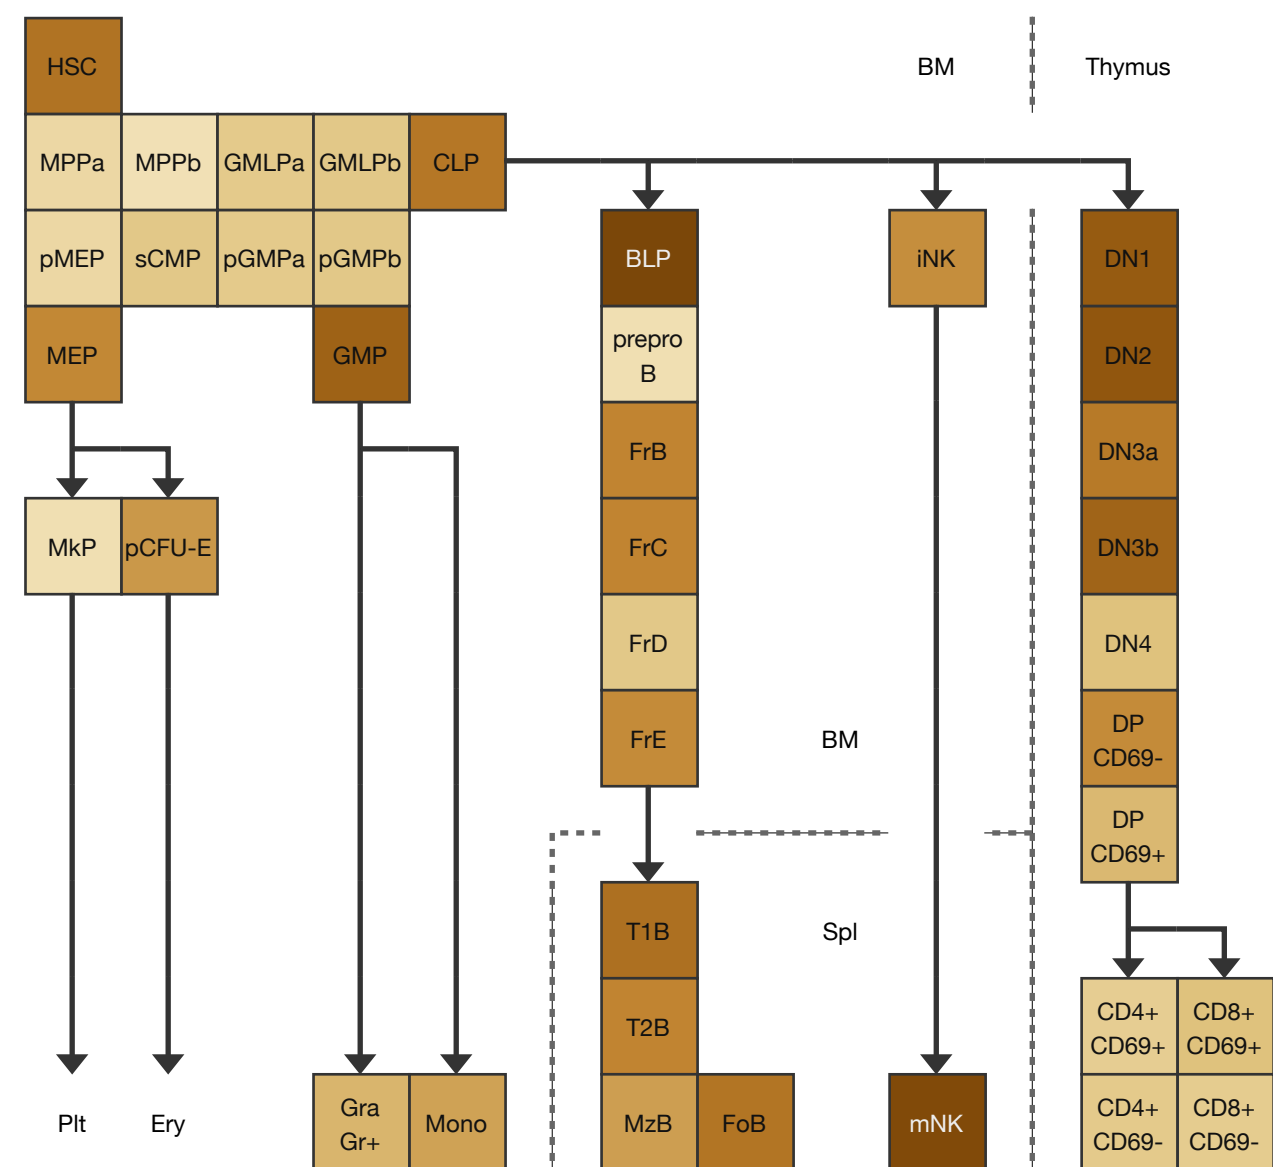

**Pax5/Runx1/Ikzf1 unique sites geneset**

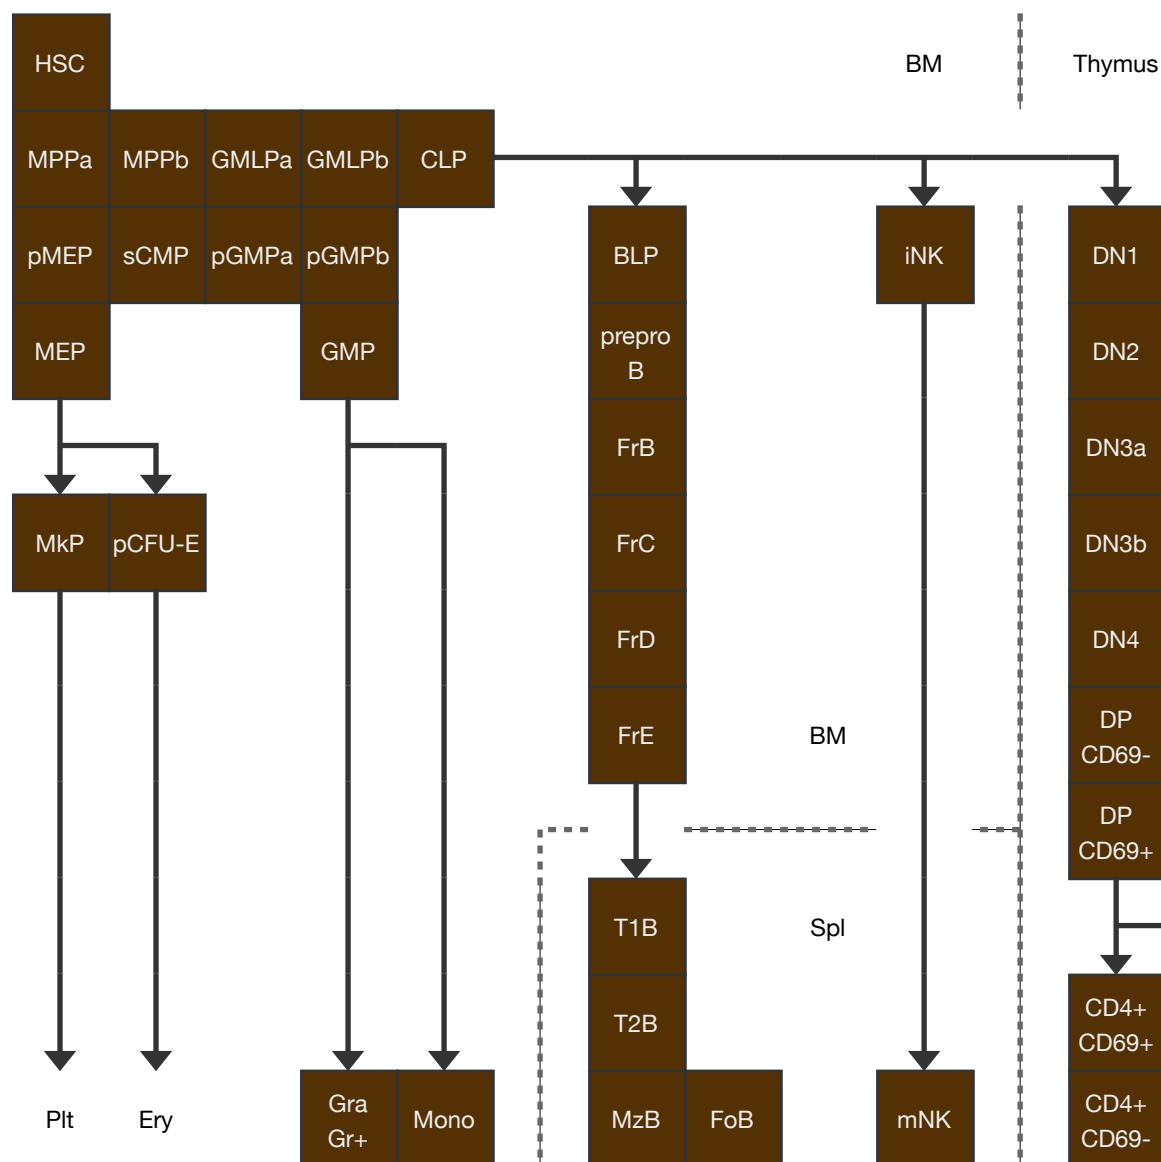

**Runx1/Ikzf1 unique geneset**

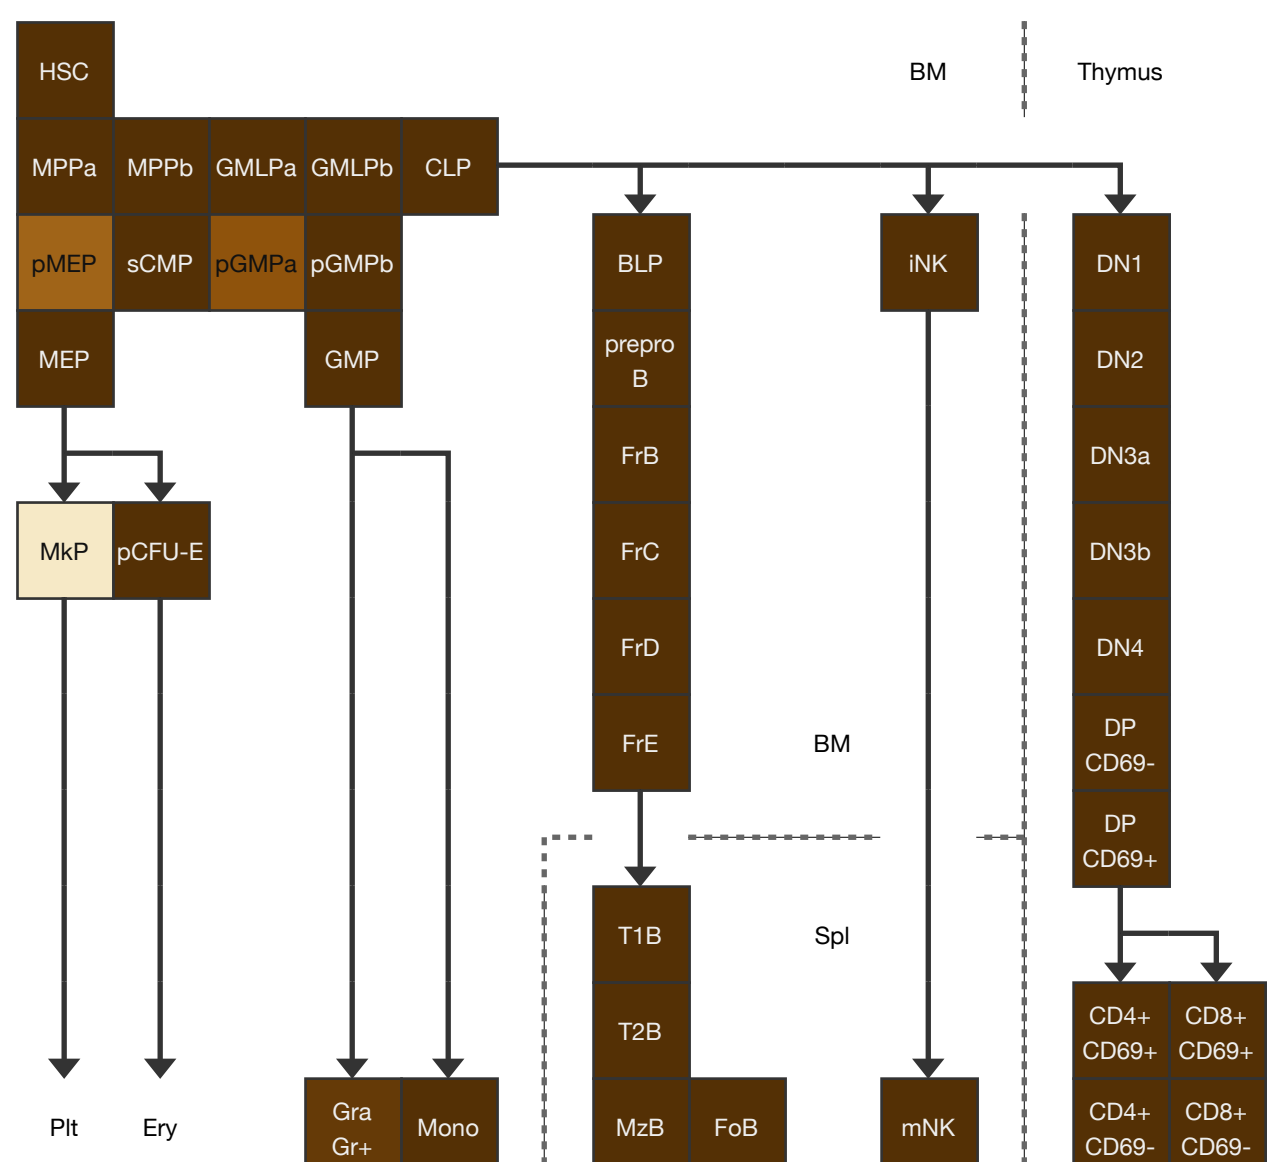

Figure S5D

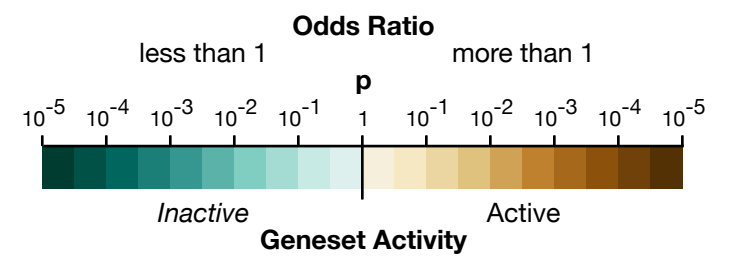

**Fli1 expression**

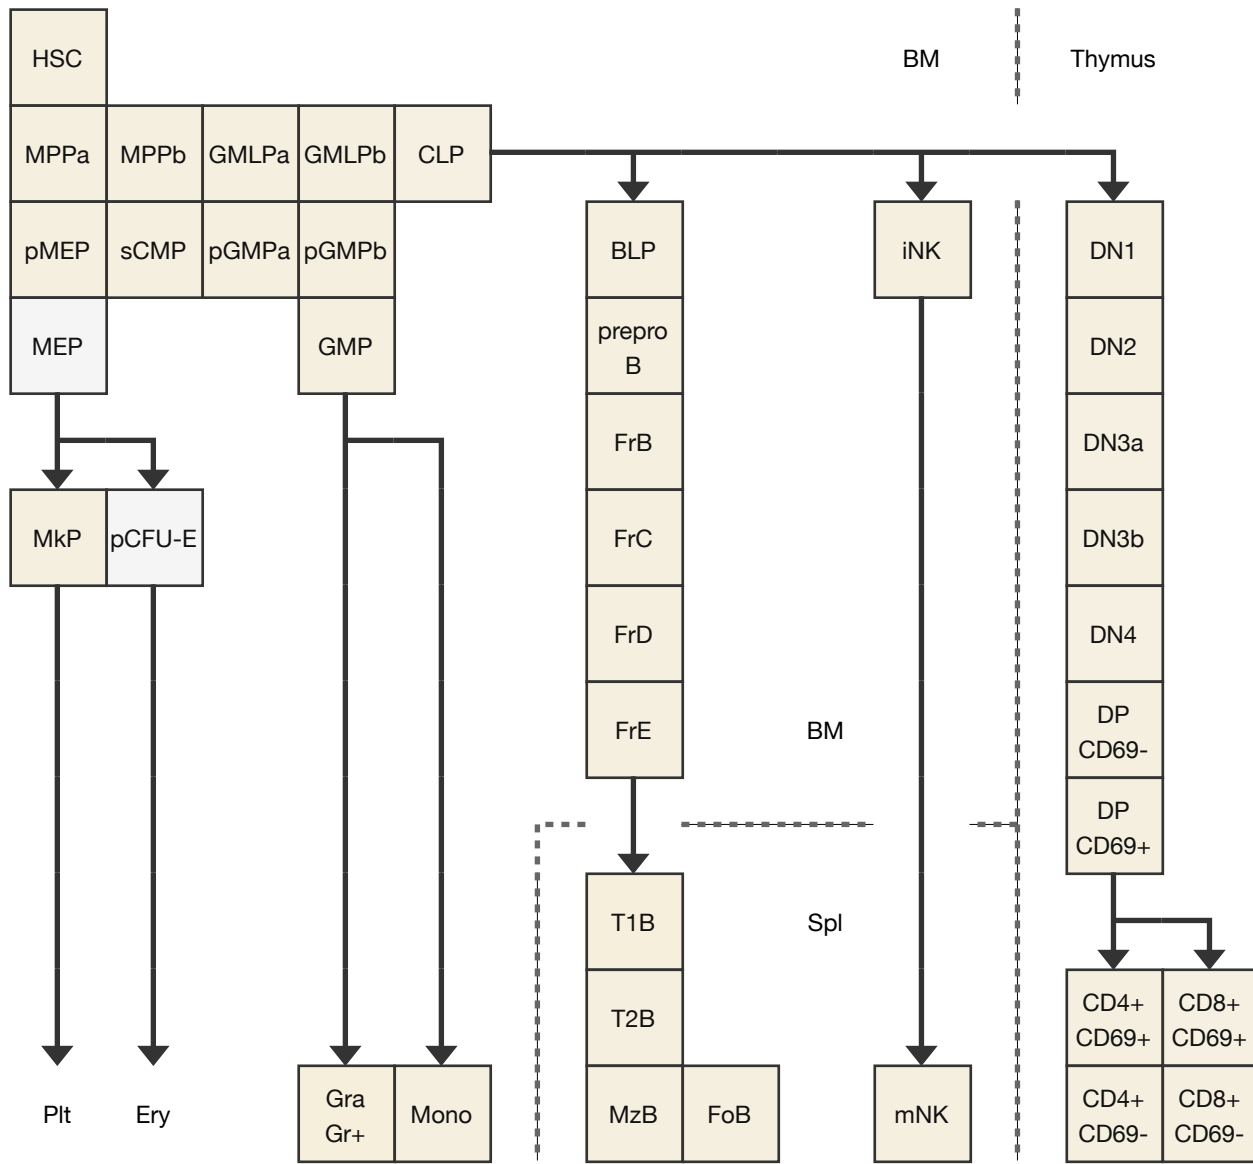

**Fli1 unique sites geneset**

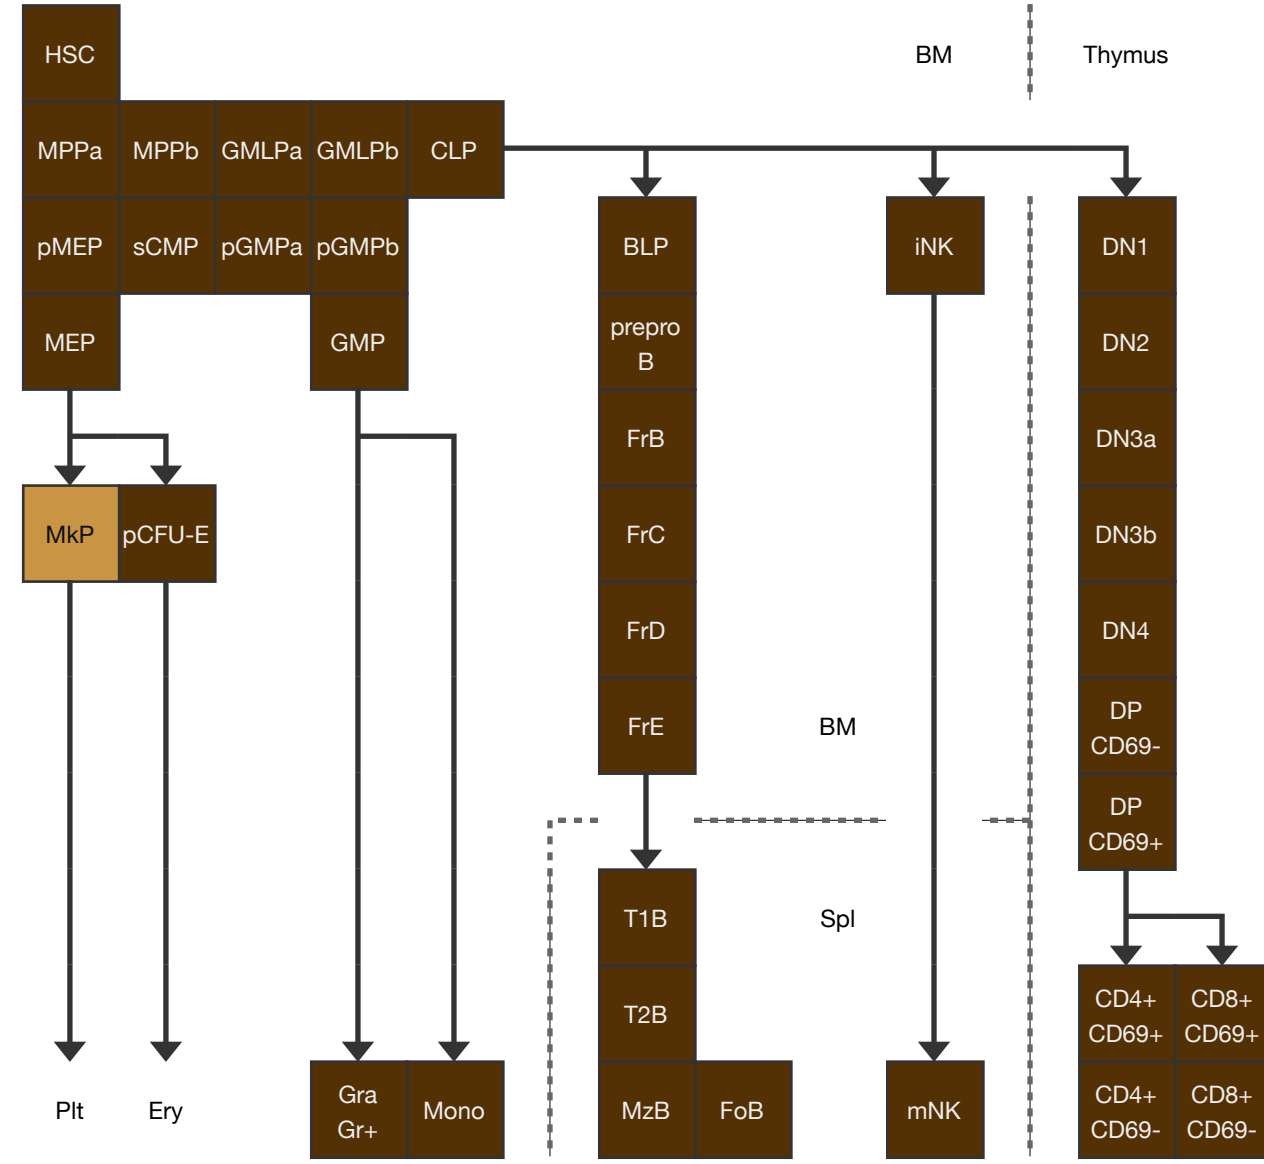

**Ar^1 mf a m] ka] geneset**

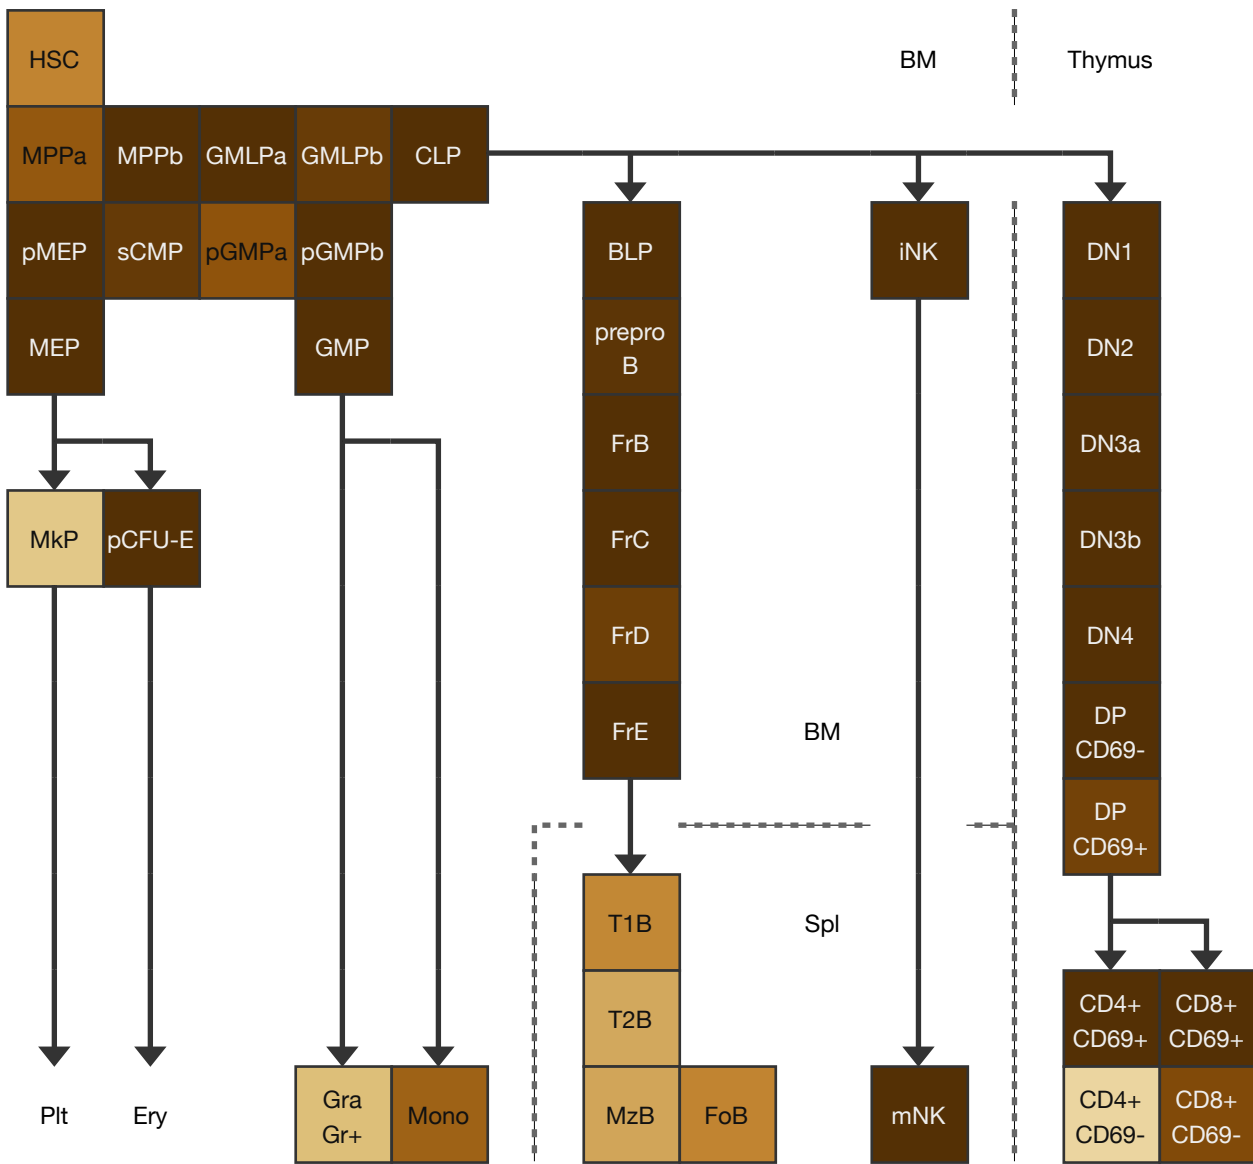

**Pax5/Fli1 unique sites geneset**

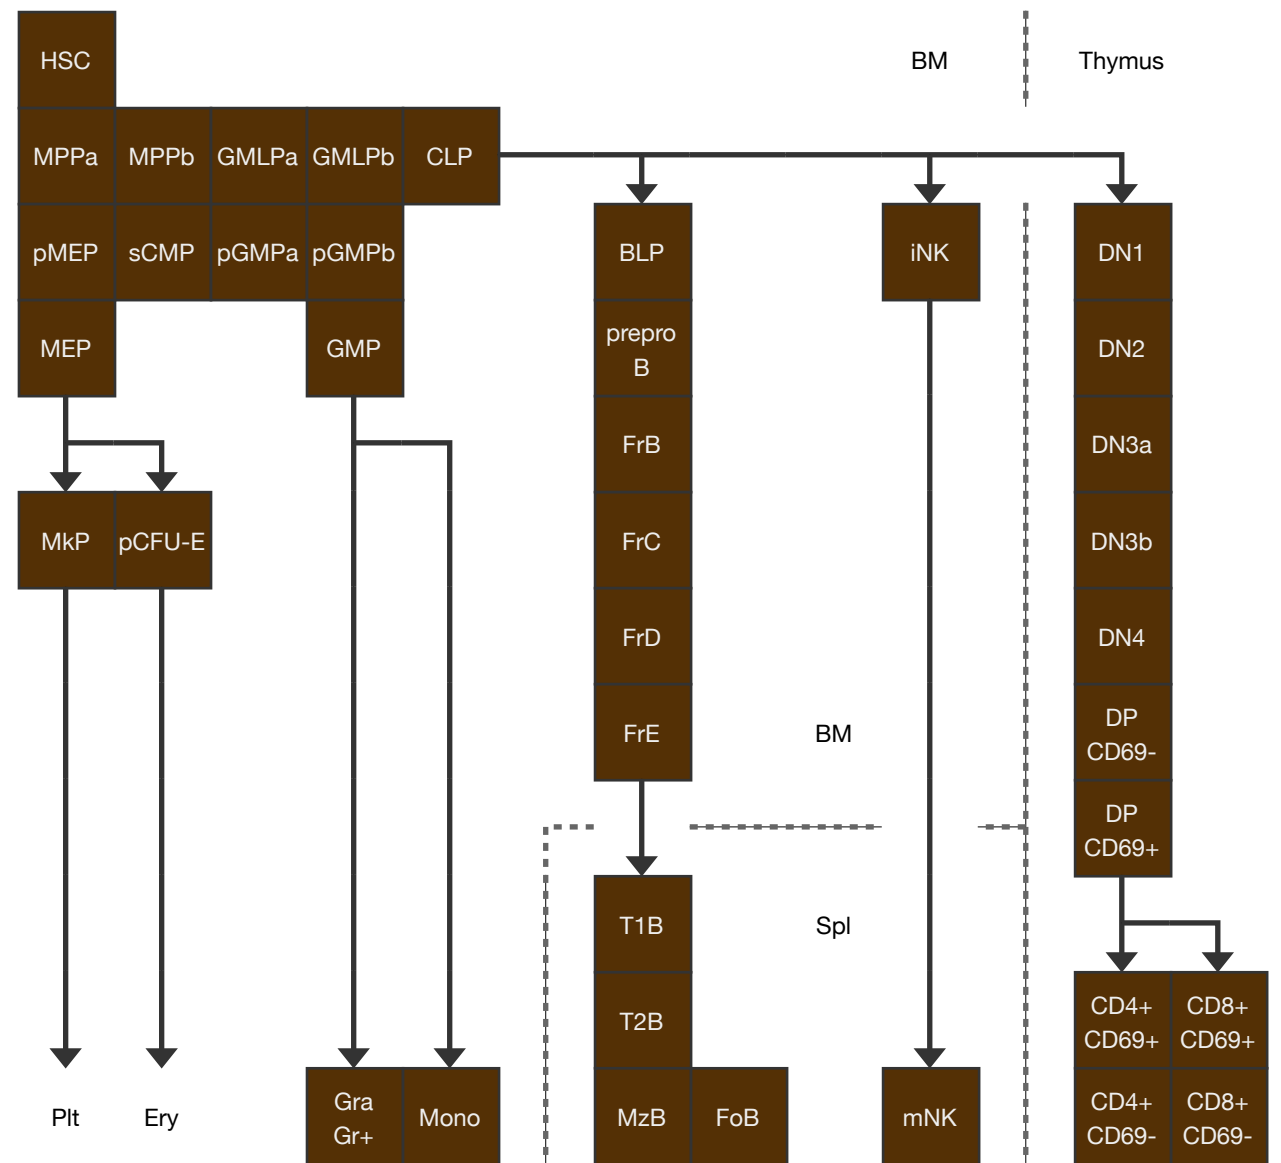

Supplement: pgen.1008280.s015.pdf [file pgen.1008280.s015.pdf]
