# Supplementary material for: PAX5 is part of a functional transcription factor network targeted in lymphoid leukemia
Source: PubMed Central journal article supplement (PMC6695195; doi:10.1371/journal.pgen.1008280), 2019-08-05

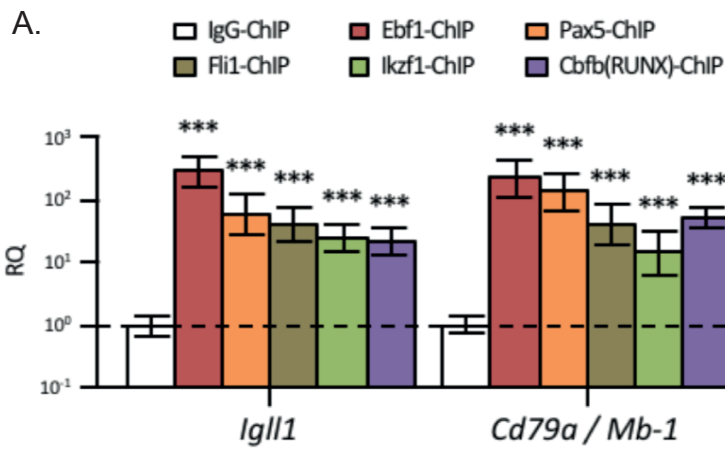

B.

| Rank                   | <i>De novo</i> Motif | P-value | % T/Bg    | Best match |
|------------------------|----------------------|---------|-----------|------------|
| 230-238<br>PAX5 peaks  | 1.                   | 1e-463  | 18.5/5.7  | PAX1       |
|                        | 2.                   | 1e-437  | 16.7/5.0  | PAX8       |
|                        | 3.                   | 1e-235  | 33.7/20.2 | ETV2 (ETS) |
|                        | 9.                   | 1e-110  | 15.9/9.1  | EBF        |
|                        | 11.                  | 1e-83   | 14.5/8.8  | RUNX2      |
| 230-238<br>IKZF1 peaks | 1.                   | 1e-318  | 36.7/19.4 | ETV2 (ETS) |
|                        | 2.                   | 1e-183  | 10.3/3.5  | RUNX       |
|                        | 3.                   | 1e-119  | 6.9/2.4   | NRF1       |
|                        | 5.                   | 1e-101  | 17.9/10.4 | EBF        |
| 230-238<br>RUNX1 peaks | 1.                   | 1e-1403 | 29.5/9.9  | ETS1 (ETS) |
|                        | 2.                   | 1e-1055 | 17.2/4.5  | RUNX2      |
|                        | 3.                   | 1e-525  | 10.9/3.4  | EBF        |

C.

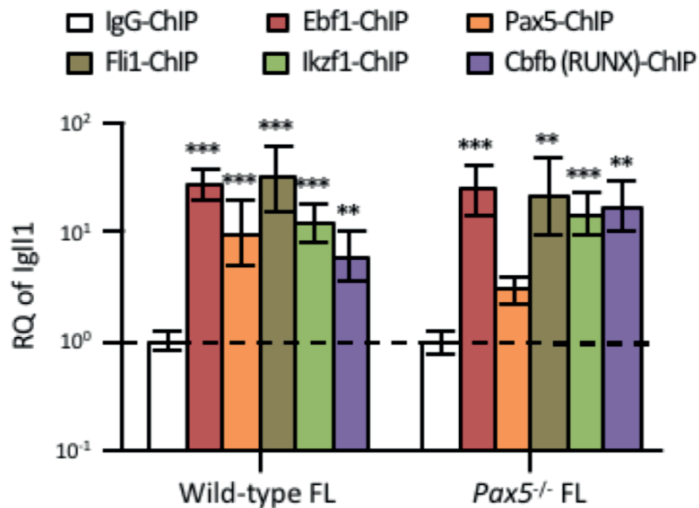

D.

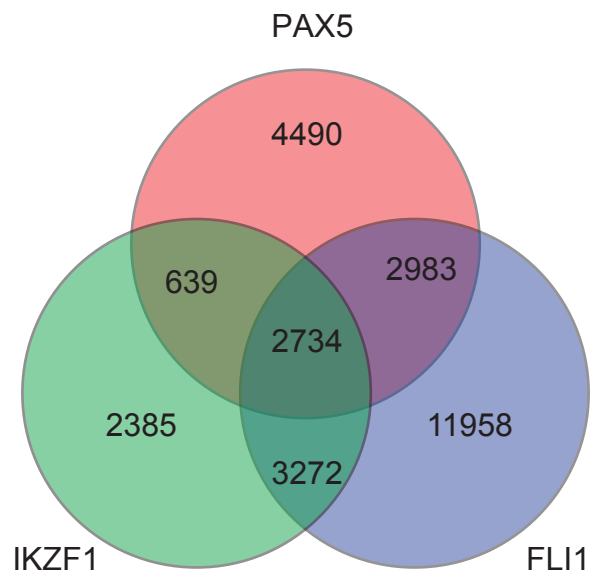

Supplement: pgen.1008280.s014.pdf [file pgen.1008280.s014.pdf]
