# Supplementary material for: PAX5 is part of a functional transcription factor network targeted in lymphoid leukemia
Source: PubMed Central journal article supplement (PMC6695195; doi:10.1371/journal.pgen.1008280), 2019-08-05
Supplement: pgen.1008280.s016.pdf [file pgen.1008280.s016.pdf]

Figure S6

|                       | Rank | <i>De novo</i> Motif | P-value | % T/Bg      | Best match   |
|-----------------------|------|----------------------|---------|-------------|--------------|
| NALM6<br>PAX5 peaks   | 1.   |                      | 1e-886  | 31.6 / 10.9 | PAX2         |
|                       | 2.   |                      | 1e-784  | 29.7 / 10.5 | PAX6         |
|                       | 3.   |                      | 1e-662  | 35.1 / 15.4 | ETV2 (ETS)   |
|                       | 5.   |                      | 1e-480  | 13.9 / 3.8  | EBF          |
|                       | 6.   |                      | 1e-368  | 11.6 / 3.4  | RUNX         |
| NALM6<br>EBF1 peaks   | 1.   |                      | 1e-8225 | 68.3 / 8.0  | EBF          |
|                       | 2.   |                      | 1e-677  | 36.3 / 18.1 | PTF1a (bHLH) |
|                       | 3.   |                      | 1e-666  | 37.1 / 18.8 | ETV2 (ETS)   |
|                       | 4.   |                      | 1e-411  | 17.7 / 7.5  | RUNX1        |
| NALM6<br>IKZF11 peaks | 1.   |                      | 1e-3034 | 53.4 / 21.5 | FLI1 (ETS)   |
|                       | 2.   |                      | 1e-1860 | 37.7 / 15.2 | ASCL1 (bHLH) |
|                       | 3.   |                      | 1e-1560 | 19.3 / 5.1  | EBF          |
|                       | 4.   |                      | 1e-1271 | 21.1 / 7.0  | RUNX1        |
|                       | 9.   |                      | 1e-187  | 7.7 / 3.9   | PAX6         |
| NALM6<br>RUNX1 peaks  | 1.   |                      | 1e-2009 | 35.8 / 9.3  | RUNX         |
|                       | 2.   |                      | 1e-1977 | 48.8 / 17.5 | FLI1 (ETS)   |
|                       | 3.   |                      | 1e-1676 | 42.0 / 14.7 | PTF1a (bHLH) |
|                       | 4.   |                      | 1e-1227 | 21.5 / 5.1  | EBF          |
|                       | 11.  |                      | 1e-127  | 6.9 / 3.2   | PAX2         |
