# Supplementary material for: PAX5 is part of a functional transcription factor network targeted in lymphoid leukemia
Source: PubMed Central journal article supplement (PMC6695195; doi:10.1371/journal.pgen.1008280), 2019-08-05

Figure S8

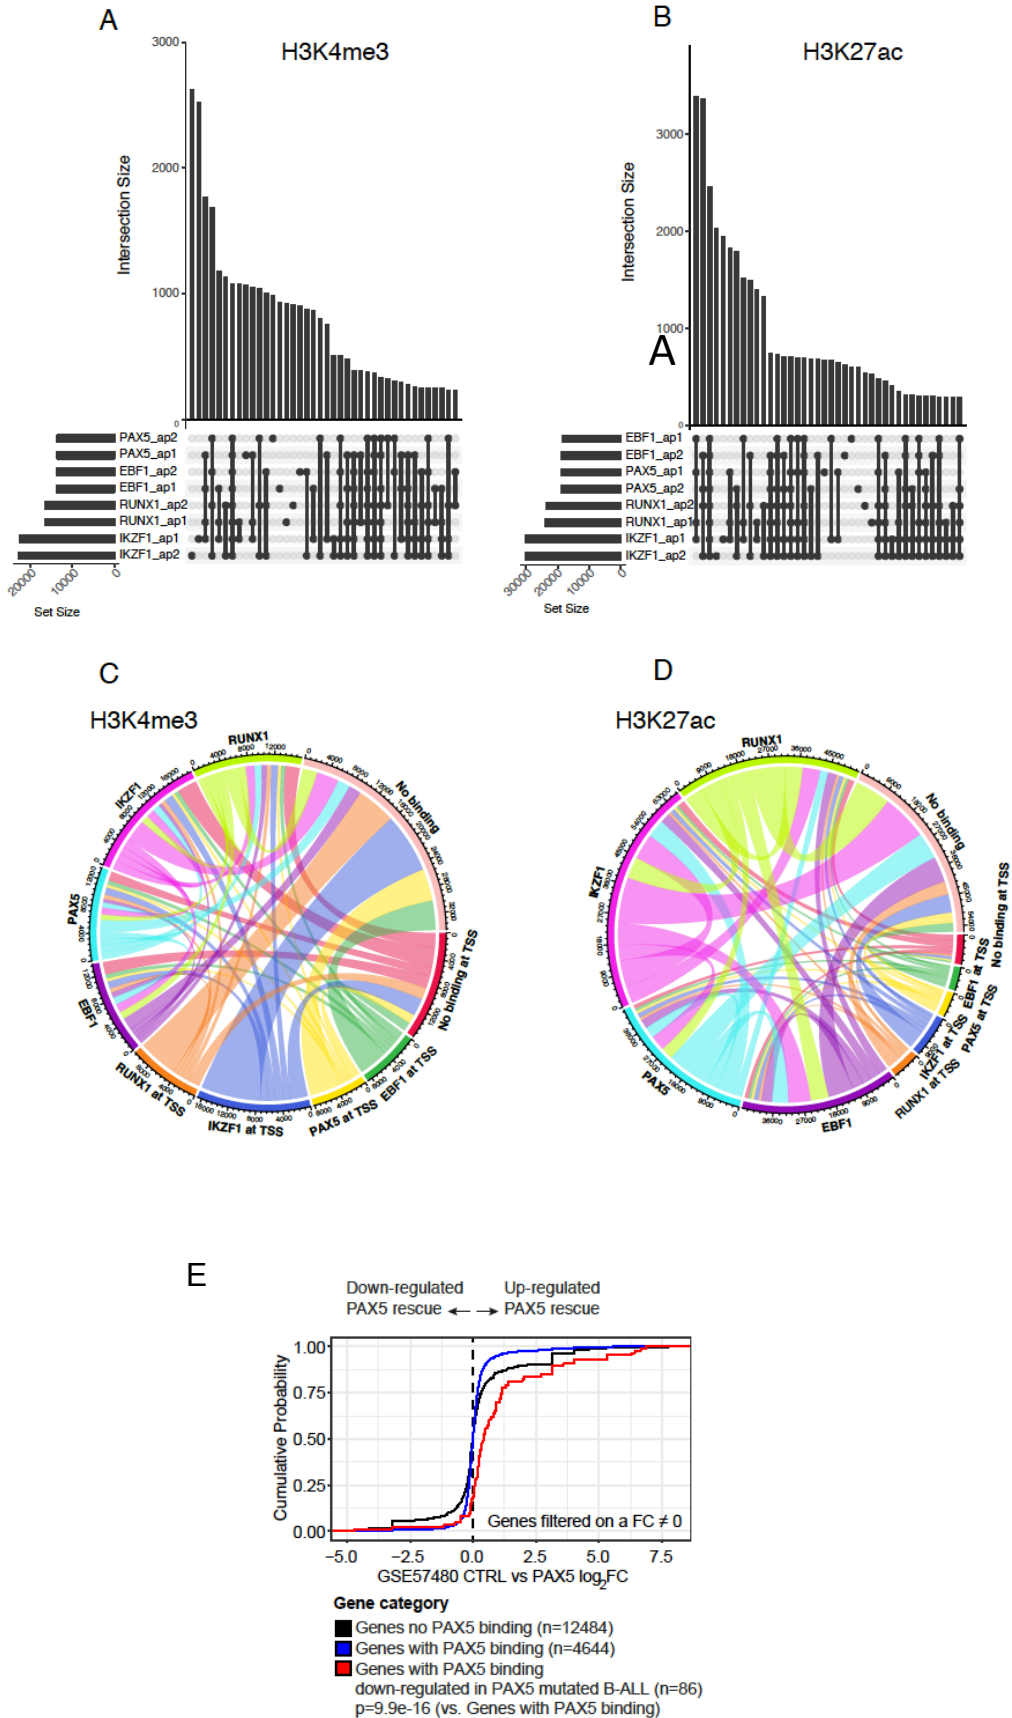

Supplement: pgen.1008280.s018.pdf [file pgen.1008280.s018.pdf]
