# Supplementary material for: PAX5 is part of a functional transcription factor network targeted in lymphoid leukemia
Source: PLoS Genet. 2019 Aug 5;15(8):e1008280. doi: 10.1371/journal.pgen.1008280 (PMC6695195; doi:10.1371/journal.pgen.1008280)
Supplement: S1 Table — The diagram displays proteins identified as PAX5 PXIs in 230–238 mouse B-ALL cells. The Saint score and the enrichment of a given protein as compared to what was observed in cells transduced with an NLS-BIRA* is indicated. Proteins previously identified as PAX5 interacting factors [16] or proteins identified by STRING analysis (https://string-db.org) as direct or indirect partners (S1 Fig) are indicated. The table also display GO-terms defined using Gene ontology (GO) analysis performed with PANTHER14.0. (XLSX) [file pgen.1008280.s002.xlsx]

## Sheet: Table wtPAX5 PXIs
	PXIs	NLS-BIRA*	PAX5-BIRA*	SAINT		IP verified Mac Manus et at			Identified as direct or indirect in String
1	9530053A07Rik		4	1
2	ABCB7	1	4	1
3	AHDC1	1	16	1
4	AMPD2		6	1
5	ARF4		22	1
6	ARID1A		87	1					Indirect
7	ARID1B		20	1					Indirect
8	ARID3A	2	25	1
9	ARID3B	3	45	1
10	ARL1		5	1
11	ATAD1		7	1
12	ATAD3		6	1
13	BCL11A		5	1
14	BRD4	13	54	1
15	CAD	1	9	1
16	CAP1		5	1
17	CCNK		4	1
18	CDK12		5	1
19	CECR2		7	1
20	CHAMP1		9	1
21	CHD8	3	15	1		Yes
22	CHMP5		7	1
23	CORO1A		10	1
24	CPSF6	14	44	1
25	CPSF7	1	19	1
26	CRAT		6	1
27	CREM		5	1
28	CTPS1		7	1
29	CUX1	1	29	1
30	DDX1		5	1
31	DDX6		4	1
32	DLG5		4	1
33	DNAJB6		7	1
34	DVL3		7	1
35	E2F6		4	1
36	EBF1		18	1					Direct
37	EIF4H		5	1
38	ELMSAN1		7	1
39	ERG	8	59	1
40	ETFA		5	1
41	FLI1	25	126	1
42	FOXO1		4	1
43	FOXP1		8	1
44	GATAD2A	2	11	1
45	GBP3		4	1
46	GBP7	1	14	1
47	GMEB2		7	1
48	GRM1	1	6	1
49	GSE1		9	1
50	GTF3C4		8	1
51	GVIN1		11	1
52	HCLS1		9	1
53	HMGA1		4	1
54	IKZF1		16	1
55	IPO4		7	1
56	IRF2BP2		11	1
57	JMJD1C	6	143	1
58	KMT2B		6	1					Indirect
59	KMT2D		8	1					Indirect
60	LEF1		5	1
61	LIN54		5	1
62	LPXN		8	1
63	MDM4		4	1
64	MEF2D	5	24	1					Indirect
65	MOGS		12	1
66	MSL3		8	1
67	MTA1		9	1
68	MYH9		84	1
69	NCOA3		6	1
70	NCOA6		22	1
71	NR2C1		9	1
72	NR2C2		36	1
73	ORC3		6	1
74	PAX5		111	1
75	PCCA		150	1
76	PCX	382	1699	1
77	PDHB	1	19	1
78	PDIA6		10	1
79	PFDN5	1	13	1
80	PTBP1		20	1
81	RAI1	1	13	1
82	RFX1		12	1
83	RUNX1		5	1					indirect
84	SF1	11	60	1
85	SIPA1	1	12	1
86	SMARCA4	3	20	1		Yes			Indirect
87	SMARCD2		6	1					Indirect
88	SMARCE1	1	12	1		Yes			Indirect
89	SMC4		4	1
90	SNX1		8	1
91	SOX21	1	8	1
92	STAG2		6	1
93	STAT3	4	21	1
94	TAF15		30	1
95	TAF6		4	1		Yes
96	TAF9B		5	1		Yes
97	THBS4	51	180	1
98	TLE3		12	1
99	TPH2		8	1
100	TRIP13		6	1
101	USP7	3	20	1
102	VBP1		11	1
103	VIM	3	13	1
104	YWHAG	1	6	1
105	YWHAZ	1	10	1
106	ZBTB14		5	1
107	ZBTB33	29	115	1
108	ZCWPW1		7	1
109	ZEB2		8	1
110	ZFP292		8	1
111	ZFP592		4	1
112	ADCY3		3	0.99
113	CRKL		3	0.99
114	FADS2P1		3	0.99
115	IKZF3	6	20	0.99
116	LENG8	6	22	0.99
117	OLFR174		3	0.99
118	PAX4		3	0.99
119	PFDN4		3	0.99
120	SAP130		3	0.99
121	SECISBP2		3	0.99
122	SNX15		3	0.99
123	SUGP2		3	0.99
124	TIMM50	3	12	0.99
125	XPO1	2	23	0.99
126	ZMIZ1		3	0.99
127	ACACB	73	177	0.98
128	ACAP1		3	0.98
129	ACTL6A	1	5	0.98					Indirect
130	AHRR		3	0.98
131	ANP32A		3	0.98
132	ARID2		5	0.98					Indirect
133	BC017643		3	0.98
134	CNTNAP1		3	0.98
135	CUL5		6	0.98
136	CUX2		3	0.98
137	DNM1L		5	0.98
138	DOT1L	1	4	0.98
139	DPF2		3	0.98
140	EFHB		4	0.98
141	EIF3M		9	0.98
142	EP400	2	16	0.98
143	FAM65C		4	0.98
144	GATAD2B	4	10	0.98
145	GM4950		3	0.98
146	KIF2A	1	8	0.98
147	LONP1		6	0.98
148	MBD2		3	0.98
149	MRPL28		7	0.98
150	MSN		3	0.98
151	NCOR1		9	0.98		Yes
152	NFKBIZ		3	0.98
153	OGT		5	0.98
154	PIAS1		3	0.98
155	PIN4		8	0.98
156	PNO1		3	0.98
157	POLD1		3	0.98
158	POU2F1		3	0.98
159	PRSS1		11	0.98
160	SEC31A		5	0.98
161	SF3A3	1	8	0.98
162	SHROOM4		3	0.98
163	SLK		5	0.98
164	SMDT1		3	0.98
165	SSXB2		3	0.98
166	STT3A	1	11	0.98
167	SWAP70	1	7	0.98
168	TAP1		3	0.98
169	TRPC5		3	0.98
170	VAV1		5	0.98
171	VPS13D		3	0.98
172	ZFP281	6	20	0.98
173	ELF1	2	8	0.97					Indirect
174	PSMD14	4	21	0.97
175	TCP1	41	100	0.97
176	HAUS6		2	0.96
177	PNISR		2	0.96
178	SNAPC4		2	0.96
179	TFAP4		2	0.96
180	IPO9	2	10	0.95
181	KRT13	6	19	0.95
182	KRT8	4	14	0.95
183	NACA	2	10	0.95
184	CTCF	2	6	0.93
185	DDX54	1	5	0.93
186	CCDC130	2	5	0.91
187	HADHB	2	14	0.91
188	RAB5C	8	18	0.91
189	RANBP2	3	9	0.91
190	MSANTD2	2	7	0.9
191	ZIC2	5	12	0.9
192	ADRM1		3	0.88
193	ALDH9A1		5	0.88
194	ARFGAP1		3	0.88
195	ATL3		5	0.88
196	BAP1		7	0.88
197	BRI3BP		3	0.88
198	CBFB		3	0.88					Direct
199	CD300LH		4	0.88
200	EFTUD2	5	11	0.88
201	GNAS		9	0.88
202	INTS1		8	0.88
203	LSM7		3	0.88
204	MEAF6		3	0.88
205	MYO1C		8	0.88
206	NCOR2		3	0.88
207	PDCD6IP		10	0.88
208	PFAS		4	0.88
209	PSMC1		3	0.88
210	RBM14		6	0.88
211	SIN3A	3	12	0.88					Indirect
212	WDR3		5	0.88
213	ZFP687		3	0.88
214	HIVEP3	1	4	0.87
215	BAZ2B		2	0.86
216	BRIX1		2	0.86
217	GM4340		2	0.86
218	GTF2H1		2	0.86
219	KDM1A		2	0.86
220	LDHA		2	0.86
221	NFRKB		2	0.86
222	PCDHA9		2	0.86
223	PIK3CG		2	0.86
224	Q3U0D2		2	0.86
225	RCOR3		2	0.86
226	SCAF11		2	0.86
227	SLC12A4		2	0.86
228	SUPT5		2	0.86
229	TCF3		2	0.86					Direct
230	TFDP1		2	0.86
231	TTC30A2		2	0.86
232	TUBGCP3		2	0.86
233	USP9X		2	0.86
234	YY1		2	0.86
235	ZBED4		2	0.86
236	ZFP384		2	0.86
237	CORO1C	6	21	0.85
238	KRT76	3	6	0.85
239	ABCE1	5	24	0.84

## Sheet: Table GO-slim
PANTHER GO-Slim Terms	Accession	Ref	PAX5 PXIs	Expected	Fold enrichment	p-value
Regulation of transcription from RNA polymerase II promoter	GO:0006357	586	33	6.50175	5.07556	1.45e-11
Transcription from RNA polymerase II promoter	GO:0006366	763	37	8.46559	4.37063	3.01e-11
Chromatin organization	GO:0006325	258	11	2.86255	3.84273	0.0473
Transcription, DNA-dependent	GO:0006351	998	42	11.0729	3.79303	5.27e-11
Biosynthetic process	GO:0009058	1719	64	19.0725	3.35561	2.11e-15
RNA metabolic process	GO:0016070	1536	53	17.0421	3.10994	5.05e-11
Nitrogen compound metabolic process	GO:0006807	2462	70	27.3162	2.56258	2.9e-11
Nucleobase-containing compound metabolic process	GO:0006139	2710	75	30.0678	2.49436	1.19e-11
Primary metabolic process	GO:0044238	4839	103	53.6894	1.91844	8e-10
Metabolic process	GO:0008152	6009	119	66.6707	1.78489	4.67e-10
Cellular process	GO:0009987	8762	133	97.2156	1.36809	0.00129
Nucleoplasm	GO:0005654	382	26	4.23834	6.13447	3.93e-11
Nucleus	GO:0005634	1971	64	21.8685	2.92658	3.44e-13
Protein complex	GO:0043234	1868	45	20.7257	2.17122	5.7e-05
Macromolecular complex	GO:0032991	2249	49	24.953	1.96369	0.00039
Organelle	GO:0043226	3964	84	43.9811	1.90991	1.02e-07
Intracellular	GO:0005622	5321	107	59.0372	1.81242	2.07e-09
Cell part	GO:0044464	5571	107	61.811	1.73108	3.32e-08
Sequence-specific DNA binding RNA polymerase II transcription factor activity	GO:0000981	229	14	2.54079	5.5101	9.46e-05
Transcription cofactor activity	GO:0003712	207	11	2.29669	4.78949	0.00546
Transcription factor binding transcription factor activity	GO:0000989	236	12	2.61845	4.58286	0.00362
Protein binding transcription factor activity	GO:0000988	243	12	2.69612	4.45084	0.00476
DNA binding	GO:0003677	1071	51	11.8829	4.29188	4.86e-16
Sequence-specific DNA binding transcription factor activity	GO:0003700	790	36	8.76516	4.10717	2.86e-10
Nucleic acid binding	GO:0003676	1614	67	17.9076	3.74144	8.16e-19
RNA binding	GO:0003723	397	14	4.40477	3.17837	0.0342
Binding	GO:0005488	5268	103	58.4492	1.76221	1.11e-07

## Sheet: Table GO, Reactome
GO molecular function complete	Accession	Ref	PAX5 PXIs	Expected	Fold enrichment	p-value		GO biological process complete	Accession	Ref	PAX5 PXIs	Expected	Fold enrichment	p-value		Reactome pathways	Accession	Ref	PAX5 PXIs	Expected	Fold enrichment	p-value
distal enhancer DNA-binding transcription activator activity, RNA polymerase II-specific	GO:0001205	42	6	0.465996	12.8757	0.037		nucleosome disassembly	GO:0006337	15	5	0.166427	30.0432	0.0177		RUNX1 regulates transcription of genes involved in interleukin signaling	R-MMU-8939247	3	3	0.0332854	90.1296	0.0401
steroid hormone receptor binding	GO:0035258	87	9	0.965277	9.32375	0.00305		chromatin disassembly	GO:0031498	15	5	0.166427	30.0432	0.0177		RUNX1 interacts with co-factors whose precise effect on RUNX1 targets is not known	R-MMU-8939243	37	9	0.41052	21.9234	2.43e-06
RNA polymerase II distal enhancer sequence-specific DNA binding	GO:0000980	91	9	1.00966	8.91391	0.0043		protein-DNA complex disassembly	GO:0032986	17	5	0.188617	26.5087	0.0296		RMTs methylate histone arginines	R-MMU-3214858	46	7	0.510376	13.7154	0.00278
enhancer binding	GO:0035326	125	12	1.38689	8.65244	0.000104		ATP-dependent chromatin remodeling	GO:0043044	38	7	0.421615	16.6028	0.00479		Deactivation of the beta-catenin transactivating complex	R-MMU-3769402	41	6	0.454901	13.1897	0.019
transcription factor activity, RNA polymerase II distal enhancer sequence-specific binding	GO:0003705	117	11	1.29813	8.47372	0.000473		histone H4 acetylation	GO:0043967	50	8	0.554757	14.4207	0.00192		HDACs deacetylate histones	R-MMU-3214815	48	6	0.532567	11.2662	0.043
enhancer sequence-specific DNA binding	GO:0001158	114	10	1.26485	7.9061	0.00311		histone acetylation	GO:0016573	93	10	1.03185	9.69135	0.00174		Transcriptional regulation by RUNX1	R-MMU-8878171	167	18	1.85289	9.71456	3.79e-09
nuclear hormone receptor binding	GO:0035257	147	12	1.63099	7.35751	0.000541		internal peptidyl-lysine acetylation	GO:0018393	98	10	1.08732	9.19689	0.00273		UCH proteinases	R-MMU-5689603	86	9	0.954182	9.43216	0.00162
acetyltransferase activity	GO:0016407	114	9	1.26485	7.11549	0.0239		internal protein amino acid acetylation	GO:0006475	101	10	1.12061	8.92372	0.00353		Chromatin modifying enzymes	R-MMU-3247509	183	18	2.03041	8.8652	1.55e-08
hormone receptor binding	GO:0051427	173	13	1.91946	6.77274	0.00041		peptidyl-lysine acetylation	GO:0018394	101	10	1.12061	8.92372	0.00353		Chromatin organization	R-MMU-4839726	183	18	2.03041	8.8652	1.55e-08
transcription corepressor activity	GO:0003714	182	12	2.01932	5.94261	0.00454		protein acetylation	GO:0006473	122	10	1.35361	7.38767	0.0175		TCF dependent signaling in response to WNT	R-MMU-201681	177	11	1.96384	5.60127	0.0122
chromatin binding	GO:0003682	569	36	6.31313	5.7024	3.56e-13		peptidyl-lysine modification	GO:0018205	233	16	2.58517	6.18915	0.000153		Generic Transcription Pathway	R-MMU-212436	733	41	8.13274	5.04135	7.62e-14
RNA polymerase II proximal promoter sequence-specific DNA binding	GO:0000978	537	33	5.95809	5.53869	1.62e-11		covalent chromatin modification	GO:0016569	325	22	3.60592	6.10108	3.84e-07		Deubiquitination	R-MMU-5688426	237	13	2.62955	4.94382	0.00671
DNA-binding transcription activator activity, RNA polymerase II-specific	GO:0001228	462	28	5.12595	5.4624	2.94e-09		histone modification	GO:0016570	316	21	3.50606	5.98962	1.49e-06		RNA Polymerase II Transcription	R-MMU-73857	851	45	9.44196	4.76596	1.39e-14
proximal promoter sequence-specific DNA binding	GO:0000987	550	33	6.10233	5.40777	3.09e-11		chromatin organization	GO:0006325	610	34	6.76804	5.02361	2.82e-10		Gene expression (Transcription)	R-MMU-74160	961	50	10.6624	4.68936	2.93e-16
regulatory region nucleic acid binding	GO:0001067	926	55	10.2741	5.35327	1.45e-20		negative regulation of transcription by RNA polymerase II	GO:0000122	836	43	9.27554	4.63585	1.16e-12		Transcriptional Regulation by TP53	R-MMU-3700989	276	13	3.06226	4.24523	0.0317
proximal promoter DNA-binding transcription repressor activity, RNA polymerase II-specific	GO:0001078	187	11	2.07479	5.30174	0.0343		negative regulation of transcription, DNA-templated	GO:0045892	1130	56	12.5375	4.4666	6.18e-17		Unclassified	UNCLASSIFIED	12881	101	142.916	0.706706	0
transcription regulatory region DNA binding	GO:0044212	922	54	10.2297	5.27874	7.53e-20		negative regulation of nucleic acid-templated transcription	GO:1903507	1133	56	12.5708	4.45477	6.96e-17
RNA polymerase II regulatory region DNA binding	GO:0001012	776	43	8.60983	4.99429	2.81e-14		negative regulation of RNA biosynthetic process	GO:1902679	1134	56	12.5819	4.45084	7.24e-17
transcription factor binding	GO:0008134	692	38	7.67784	4.94931	3.68e-12		positive regulation of transcription by RNA polymerase II	GO:0045944	1182	58	13.1145	4.4226	1.69e-17
transcription factor activity, RNA polymerase II proximal promoter sequence-specific DNA binding	GO:0000982	495	27	5.49209	4.91616	7.54e-08		in utero embryonic development	GO:0001701	428	21	4.74872	4.42224	0.000244
proximal promoter DNA-binding transcription activator activity, RNA polymerase II-specific	GO:0001077	332	18	3.68359	4.88654	0.00019		negative regulation of RNA metabolic process	GO:0051253	1215	59	13.4806	4.37666	1.15e-17
DNA-binding transcription repressor activity, RNA polymerase II-specific	GO:0001227	263	14	2.91802	4.79777	0.00685		transcription, DNA-templated	GO:0006351	1923	93	21.336	4.35884	2.8e-31
transcription coregulator activity	GO:0003712	452	24	5.015	4.78564	1.69e-06		nucleic acid-templated transcription	GO:0097659	1924	93	21.347	4.35657	2.92e-31
transcription regulatory region sequence-specific DNA binding	GO:0000976	811	43	8.99816	4.77876	1.29e-13		RNA biosynthetic process	GO:0032774	1927	93	21.3803	4.34979	3.29e-31
RNA polymerase II regulatory region sequence-specific DNA binding	GO:0000977	768	40	8.52107	4.69425	3.25e-12		chromosome organization	GO:0051276	892	42	9.89686	4.24377	5.12e-11
sequence-specific double-stranded DNA binding	GO:1990837	850	44	9.43087	4.66553	1.23e-13		nucleobase-containing compound biosynthetic process	GO:0034654	2249	102	24.953	4.08769	6.57e-33
DNA-binding transcription factor activity, RNA polymerase II-specific	GO:0000981	795	41	8.82064	4.64819	1.88e-12		negative regulation of nucleobase-containing compound metabolic process	GO:0045934	1346	61	14.9341	4.08462	5.68e-17
sequence-specific DNA binding	GO:0043565	1094	55	12.1381	4.53119	2.49e-17		heterocycle biosynthetic process	GO:0018130	2313	103	25.6631	4.01355	1.15e-32
DNA-binding transcription factor activity	GO:0003700	1025	51	11.3725	4.48449	1.27e-15		aromatic compound biosynthetic process	GO:0019438	2324	103	25.7851	3.99455	1.72e-32
transcription regulator activity	GO:0140110	1335	65	14.812	4.38833	1.63e-20		negative regulation of cellular macromolecule biosynthetic process	GO:2000113	1316	58	14.6012	3.97228	2.3e-15
double-stranded DNA binding	GO:0003690	939	45	10.4183	4.31931	8e-13		negative regulation of macromolecule biosynthetic process	GO:0010558	1347	58	14.9452	3.88086	6.55e-15
DNA binding	GO:0003677	2023	92	22.4455	4.09882	2.44e-29		regulation of transcription by RNA polymerase II	GO:0006357	1906	82	21.1473	3.87756	2.8e-23
nucleic acid binding	GO:0003676	3040	113	33.7292	3.35021	2.86e-30		organic cyclic compound biosynthetic process	GO:1901362	2432	104	26.9834	3.85422	1.36e-31
protein domain specific binding	GO:0019904	781	26	8.6653	3.00047	0.0027		positive regulation of transcription, DNA-templated	GO:0045893	1493	62	16.565	3.74282	1.7e-15
heterocyclic compound binding	GO:1901363	4937	145	54.7767	2.64711	2.93e-31		positive regulation of nucleic acid-templated transcription	GO:1903508	1496	62	16.5983	3.73532	1.88e-15
organic cyclic compound binding	GO:0097159	5033	145	55.8418	2.59662	2.63e-30		positive regulation of RNA biosynthetic process	GO:1902680	1497	62	16.6094	3.73282	1.94e-15
RNA binding	GO:0003723	1030	29	11.428	2.53763	0.0157		negative regulation of cellular biosynthetic process	GO:0031327	1401	58	15.5443	3.73127	3.8e-14
protein dimerization activity	GO:0046983	1368	35	15.1782	2.30595	0.018		negative regulation of biosynthetic process	GO:0009890	1436	58	15.9326	3.64033	1.13e-13
purine ribonucleoside triphosphate binding	GO:0035639	1691	40	18.7619	2.13198	0.017		negative regulation of gene expression	GO:0010629	1561	63	17.3195	3.63752	3.21e-15
nucleotide binding	GO:0000166	2003	47	22.2236	2.11487	0.0029		cellular nitrogen compound biosynthetic process	GO:0044271	2701	107	29.968	3.57048	6.03e-30
nucleoside phosphate binding	GO:1901265	2003	47	22.2236	2.11487	0.0029		chordate embryonic development	GO:0043009	713	28	7.91083	3.53945	0.000117
enzyme binding	GO:0019899	2265	53	25.1305	2.10899	0.000624		positive regulation of RNA metabolic process	GO:0051254	1588	62	17.6191	3.51891	3.17e-14
purine ribonucleotide binding	GO:0032555	1763	41	19.5607	2.09604	0.0226		RNA metabolic process	GO:0016070	2686	103	29.8015	3.4562	2.84e-27
purine nucleotide binding	GO:0017076	1775	41	19.6939	2.08187	0.025		embryo development ending in birth or egg hatching	GO:0009792	731	28	8.11055	3.45229	0.000195
ribonucleotide binding	GO:0032553	1778	41	19.7272	2.07835	0.0257		cellular macromolecule biosynthetic process	GO:0034645	2719	102	30.1677	3.3811	3.82e-26
ion binding	GO:0043167	5375	100	59.6364	1.67683	6.02e-05		positive regulation of macromolecule biosynthetic process	GO:0010557	1741	65	19.3166	3.36497	3.46e-14
protein binding	GO:0005515	8917	161	98.9354	1.62733	1.01e-11		macromolecule biosynthetic process	GO:0009059	2746	102	30.4673	3.34786	8.44e-26
binding	GO:0005488	13036	212	144.636	1.46575	7.04e-17		regulation of transcription, DNA-templated	GO:0006355	3017	112	33.474	3.34588	2.38e-29
Unclassified	UNCLASSIFIED	1970	9	21.8574	0.411759	0		regulation of nucleic acid-templated transcription	GO:1903506	3019	112	33.4962	3.34366	2.52e-29
molecular transducer activity	GO:0060089	2329	6	25.8406	0.232193	0.00727		regulation of RNA biosynthetic process	GO:2001141	3025	112	33.5628	3.33703	3.01e-29
signaling receptor activity	GO:0038023	2276	4	25.2525	0.1584	0.000512		positive regulation of gene expression	GO:0010628	1897	70	21.0475	3.32581	2.16e-15
transmembrane signaling receptor activity	GO:0004888	2089	1	23.1777	0.0431448	4.06e-06		positive regulation of nucleobase-containing compound metabolic process	GO:0045935	1770	65	19.6384	3.30984	7.73e-14
								nucleic acid metabolic process	GO:0090304	3122	113	34.639	3.26222	9.88e-29
								regulation of RNA metabolic process	GO:0051252	3235	117	35.8928	3.25971	3.74e-30
GO cellular component complete	Accession	Ref	PAX5 PXIs	Expected	Fold enrichment	p-value		positive regulation of cellular biosynthetic process	GO:0031328	1835	66	20.3596	3.24172	1.11e-13
SWI/SNF complex	GO:0016514	13	6	0.144237	41.5983	5.58e-05		DNA metabolic process	GO:0006259	646	23	7.16746	3.20895	0.0126
nBAF complex	GO:0071565	15	5	0.166427	30.0432	0.00292		gene expression	GO:0010467	3038	108	33.707	3.20408	2.67e-26
npBAF complex	GO:0071564	12	4	0.133142	30.0432	0.0327		positive regulation of biosynthetic process	GO:0009891	1876	66	20.8145	3.17087	3.27e-13
SWI/SNF superfamily-type complex	GO:0070603	73	15	0.809945	18.5198	5.77e-11		regulation of nucleobase-containing compound metabolic process	GO:0019219	3504	120	38.8774	3.08663	5.24e-29
ATPase complex	GO:1904949	91	15	1.00966	14.8565	9.9e-10		regulation of cellular macromolecule biosynthetic process	GO:2000112	3410	116	37.8344	3.06599	2.36e-27
histone deacetylase complex	GO:0000118	62	9	0.687899	13.0833	0.000116		nucleobase-containing compound metabolic process	GO:0006139	3624	121	40.2088	3.00929	2.61e-28
transcriptional repressor complex	GO:0017053	83	9	0.920897	9.77308	0.00111		regulation of macromolecule biosynthetic process	GO:0010556	3489	116	38.7109	2.99657	1.88e-26
histone acetyltransferase complex	GO:0000123	81	8	0.898706	8.90168	0.00869		cellular biosynthetic process	GO:0044249	3500	115	38.833	2.9614	1.15e-25
nuclear chromatin	GO:0000790	372	34	4.12739	8.23765	3.94e-17		heterocycle metabolic process	GO:0046483	3755	122	41.6622	2.92831	1.59e-27
protein acetyltransferase complex	GO:0031248	92	8	1.02075	7.83735	0.0206		regulation of cellular biosynthetic process	GO:0031326	3627	117	40.2421	2.9074	1.35e-25
acetyltransferase complex	GO:1902493	92	8	1.02075	7.83735	0.0206		organic substance biosynthetic process	GO:1901576	3584	115	39.765	2.89199	9.39e-25
RNA polymerase II transcription factor complex	GO:0090575	164	14	1.8196	7.69399	1.58e-05		cellular aromatic compound metabolic process	GO:0006725	3815	122	42.328	2.88226	7.17e-27
nuclear transcription factor complex	GO:0044798	206	17	2.2856	7.43788	6.64e-07		regulation of biosynthetic process	GO:0009889	3692	118	40.9633	2.88063	1.49e-25
transcription factor complex	GO:0005667	415	32	4.60448	6.94975	5.53e-14		regulation of gene expression	GO:0010468	3821	122	42.3945	2.87773	8.32e-27
chromatin	GO:0000785	537	40	5.95809	6.71356	1.36e-17		central nervous system development	GO:0007417	785	25	8.70968	2.87037	0.0299
nuclear chromosome part	GO:0044454	597	37	6.6238	5.58592	1.25e-13		biosynthetic process	GO:0009058	3645	116	40.4418	2.86832	9.43e-25
nuclear chromosome	GO:0000228	631	37	7.00103	5.28493	6.67e-13		embryo development	GO:0009790	1065	33	11.8163	2.79275	0.00132
chromosomal part	GO:0044427	933	48	10.3518	4.63689	2.41e-15		organic cyclic compound metabolic process	GO:1901360	4002	123	44.4027	2.7701	1.46e-25
nucleoplasm part	GO:0044451	999	49	11.084	4.42077	6.42e-15		negative regulation of nitrogen compound metabolic process	GO:0051172	2187	67	24.2651	2.76117	1.37e-10
chromosome	GO:0005694	1049	50	11.6388	4.29597	8.54e-15		cellular nitrogen compound metabolic process	GO:0034641	4190	128	46.4886	2.75336	6.71e-27
nuclear body	GO:0016604	640	26	7.10089	3.66151	3.43e-05		negative regulation of macromolecule metabolic process	GO:0010605	2375	71	26.351	2.6944	5.68e-11
nucleoplasm	GO:0005654	2736	101	30.3563	3.32715	5.05e-26		negative regulation of cellular metabolic process	GO:0031324	2358	69	26.1623	2.63738	4.36e-10
catalytic complex	GO:1902494	1360	48	15.0894	3.18104	2.39e-09		negative regulation of metabolic process	GO:0009892	2627	73	29.1469	2.50455	9.34e-10
nuclear lumen	GO:0031981	3549	118	39.3767	2.9967	6.63e-28		positive regulation of nitrogen compound metabolic process	GO:0051173	2975	81	33.008	2.45395	5.79e-11
nuclear part	GO:0044428	4019	129	44.5914	2.89294	3.63e-30		positive regulation of cellular metabolic process	GO:0031325	3100	84	34.3949	2.44222	3.07e-11
intracellular organelle lumen	GO:0070013	3954	123	43.8702	2.80373	7.67e-27		positive regulation of macromolecule metabolic process	GO:0010604	3107	84	34.4726	2.43672	3.21e-11
organelle lumen	GO:0043233	3959	123	43.9257	2.80019	8.65e-27		organelle organization	GO:0006996	2935	76	32.5642	2.33385	9.19e-09
membrane-enclosed lumen	GO:0031974	3959	123	43.9257	2.80019	8.65e-27		positive regulation of metabolic process	GO:0009893	3360	87	37.2797	2.33371	7.34e-11
nucleus	GO:0005634	6667	170	73.9713	2.29819	1.8e-32		regulation of nitrogen compound metabolic process	GO:0051171	5176	133	57.4284	2.31593	5.87e-21
protein-containing complex	GO:0032991	5406	129	59.9803	2.15071	1.13e-17		regulation of primary metabolic process	GO:0080090	5311	136	58.9263	2.30797	2.2e-21
intracellular organelle part	GO:0044446	7166	163	79.5078	2.05011	5.36e-24		regulation of macromolecule metabolic process	GO:0060255	5395	137	59.8583	2.28874	1.88e-21
non-membrane-bounded organelle	GO:0043228	4054	91	44.9797	2.02314	1.01e-08		regulation of cellular metabolic process	GO:0031323	5449	137	60.4574	2.26606	7.1e-21
intracellular non-membrane-bounded organelle	GO:0043232	4035	90	44.7689	2.01032	1.83e-08		cellular macromolecule metabolic process	GO:0044260	5110	128	56.6962	2.25765	1.44e-18
organelle part	GO:0044422	7521	167	83.4465	2.00128	1.05e-23		regulation of metabolic process	GO:0019222	5829	139	64.6736	2.14926	3.16e-19
cytosol	GO:0005829	3425	73	38.0009	1.92101	3.43e-05		nervous system development	GO:0007399	2142	49	23.7658	2.06179	0.011
intracellular membrane-bounded organelle	GO:0043231	10090	200	111.95	1.78651	4.05e-27		macromolecule metabolic process	GO:0043170	6319	141	70.1102	2.01112	1.05e-16
membrane-bounded organelle	GO:0043227	10793	208	119.75	1.73695	4.82e-28		animal organ development	GO:0048513	2967	65	32.9193	1.97453	0.000746
intracellular organelle	GO:0043229	11770	212	130.59	1.6234	1.64e-24		negative regulation of cellular process	GO:0048523	4443	97	49.2957	1.96772	3.59e-08
organelle	GO:0043226	12068	214	133.896	1.59825	3.39e-24		system development	GO:0048731	4085	88	45.3236	1.94159	1.46e-06
intracellular part	GO:0044424	13497	223	149.751	1.48914	4.82e-22		nitrogen compound metabolic process	GO:0006807	7056	150	78.2873	1.91602	1.33e-16
intracellular	GO:0005622	13569	223	150.55	1.48124	9.76e-22		multicellular organism development	GO:0007275	4626	98	51.3261	1.90936	1.49e-07
cytoplasm	GO:0005737	10789	157	119.705	1.31155	0.0036		negative regulation of biological process	GO:0048519	4940	104	54.81	1.89746	4.33e-08
cell part	GO:0044464	15954	229	177.012	1.2937	3.83e-13		cellular metabolic process	GO:0044237	7320	153	81.2164	1.88386	1.71e-16
cell	GO:0005623	15956	229	177.034	1.29354	3.84e-13		cellular component organization	GO:0016043	4991	103	55.3758	1.86002	1.69e-07
membrane part	GO:0044425	7316	45	81.172	0.554378	0.000517		anatomical structure development	GO:0048856	4971	102	55.1539	1.84937	2.97e-07
intrinsic component of membrane	GO:0031224	5972	26	66.2602	0.392393	6.16e-07		cellular component organization or biogenesis	GO:0071840	5166	106	57.3175	1.84935	9.99e-08
integral component of membrane	GO:0016021	5799	22	64.3407	0.34193	3e-08		primary metabolic process	GO:0044238	7582	155	84.1233	1.84253	7.53e-16
Unclassified	UNCLASSIFIED	1301	2	14.4348	0.138554	0		developmental process	GO:0032502	5253	106	58.2828	1.81872	2.51e-07
								cellular developmental process	GO:0048869	3644	73	40.4307	1.80556	0.00226
								cell differentiation	GO:0030154	3569	71	39.5986	1.79299	0.00464
								organic substance metabolic process	GO:0071704	7932	157	88.0066	1.78396	8.04e-15
								positive regulation of cellular process	GO:0048522	5197	102	57.6614	1.76895	4.61e-06
								metabolic process	GO:0008152	8396	160	93.1548	1.71757	1.36e-13
								positive regulation of biological process	GO:0048518	5835	107	64.7401	1.65276	8.18e-05
								regulation of cellular process	GO:0050794	10563	164	117.198	1.39934	2.28e-05
								biological regulation	GO:0065007	11816	181	131.1	1.38062	1.07e-06
								regulation of biological process	GO:0050789	11211	167	124.388	1.34258	0.000504
								cellular process	GO:0009987	14210	209	157.662	1.32562	5.66e-09
								Unclassified	UNCLASSIFIED	1794	6	19.9047	0.301437	0
