# Supplementary material for: PAX5 is part of a functional transcription factor network targeted in lymphoid leukemia
Source: PLoS Genet. 2019 Aug 5;15(8):e1008280. doi: 10.1371/journal.pgen.1008280 (PMC6695195; doi:10.1371/journal.pgen.1008280)
Supplement: S2 Table — The table display genes annotated to specific ChIP-seq peaks with unique or combined binding of transcription factors as shown in Fig 3A. Genes annotated to several categories were excluded from the analysis. (XLSX) [file pgen.1008280.s003.xlsx]

## Sheet: Metadata
	Pax	Pax_IKZF1	Pax_RUNX	Pax_IKZF1_RUNX	IKZF1	IKZF1_RUNX	RUNX
# of Peaks	7500	322	7530	5810	3302	3897	12464
# of bound genes	5370	304	5493	4628	2478	2980	7302
# genes unique to category	1415	23	1664	1422	198	489	1835

## Sheet: Pax_unique_genes
Transcript/RepeatID	Gene ID (cmd=analyzeRNA.pl rna mm10 -d Documents/Basespace/Tina-33488506/Tagdirs-Tina/T1-CLP_-_-/)	GeneID	chr	start	end	strand	Length	Copies	Annotation/Divergence
NM_001034013	NM_001034013	11418	chr11	80880165	81968396	-	2631	1	Asic2
NM_001289791	NM_001289791	11419	chr15	99691755	99701130	+	4276	1	Asic1
NM_015730	NM_015730	11438	chr2	181022311	181039177	-	4429	1	Chrna4
NM_007390	NM_007390	11441	chr7	63098692	63212526	-	2079	1	Chrna7
NM_025271	NM_025271	11471	chr4	56740005	56741425	-	1418	1	Actl7b
NM_007396	NM_007396	11480	chr2	48814109	48903264	+	5668	1	Acvr2a
NM_007400	NM_007400	11489	chr7	133883199	134225097	-	7650	1	Adam12
NM_001098225	NM_001098225	11496	chr5	8072347	8368160	-	9120	1	Adam22
NM_009620	NM_009620	11498	chr12	81419549	81421878	-	2327	1	Adam4
NM_001291903	NM_001291903	11514	chr15	64699035	64922296	-	4930	1	Adcy8
NM_009625	NM_009625	11516	chr17	93199168	93206537	+	3387	1	Adcyap1
NM_013460	NM_013460	11550	chr2	131545357	131562285	-	2390	1	Adra1d
NM_001291857	NM_001291857	11568	chr11	5861866	5872248	+	4052	1	Aebp1
NM_007442	NM_007442	11695	chr2	93642434	93681339	+	5197	1	Alx4
NM_007445	NM_007445	11705	chr10	80805248	80807648	+	1659	1	Amh
NM_020332	NM_020332	11732	chr15	27466677	27594907	+	3482	1	Ank
NM_013470	NM_013470	11745	chr5	96793385	96845968	+	1582	1	Anxa3
NM_009681	NM_009681	11777	chr18	46741876	46790826	+	1512	1	Ap3s1
NM_001198826	NM_001198826	11820	chr16	84954436	85173707	-	3284	1	App
NM_009706	NM_009706	11855	chr12	52516077	52567851	+	5188	1	Arhgap5
NM_019915	NM_019915	11872	chr7	101578860	101581161	-	866	1	Art2b
NM_007494	NM_007494	11898	chr2	31470270	31520670	+	1613	1	Ass1
NM_001142741	NM_001142741	11994	chr10	73821867	74634765	+	8936	1	Pcdh15
NM_001171739	NM_001171739	12017	chr4	40936398	40948294	-	1340	1	Bag1
NM_007524	NM_007524	12020	chr5	41761483	41764220	-	1433	1	Nkx3-2
NM_009752	NM_009752	12091	chr9	114401078	114474379	+	2378	1	Glb1
NM_007557	NM_007557	12162	chr2	172868012	172940321	-	3661	1	Bmp7
NM_007562	NM_007562	12173	chr7	81966662	81992299	-	4656	1	Bnc1
NM_009764	NM_009764	12189	chr11	101488764	101551955	-	6623	1	Brca1
NM_007572	NM_007572	12259	chr4	136895916	136898844	-	1077	1	C1qa
NM_009780	NM_009780	12268	chr17	34728381	34743897	-	5350	1	C4b
NM_001252060	NM_001252060	12286	chr8	84415364	84640249	+	7728	1	Cacna1a
NM_001255998	NM_001255998	12288	chr6	118587240	119196409	-	13365	1	Cacna1c
NM_001112813	NM_001112813	12291	chr11	94408391	94474198	-	8117	1	Cacna1g
NM_009785	NM_009785	12294	chr14	28904943	29721864	-	3655	1	Cacna2d3
NM_009789	NM_009789	12309	chrX	162961992	162964599	-	475	1	S100g
NM_009827	NM_009827	12425	chr5	53698485	53707704	-	2922	1	Cckar
NM_009840	NM_009840	12469	chr16	87483325	87495869	-	2374	1	Cct8
NM_009854	NM_009854	12516	chr11	121036749	121039478	-	1034	1	Cd7
NM_009855	NM_009855	12519	chr16	38458933	38486932	+	1693	1	Cd80
NM_001081110	NM_001081110	12525	chr6	71373427	71379171	+	3123	1	Cd8a
NM_009866	NM_009866	12552	chr8	102632095	102785111	-	5101	1	Cdh11
NM_019707	NM_019707	12554	chr8	118283611	119324927	+	3897	1	Cdh13
NM_007664	NM_007664	12558	chr18	16588877	16809246	-	4825	1	Cdh2
NM_001039154	NM_001039154	12564	chr8	99028769	99416471	-	3807	1	Cdh8
NM_009885	NM_009885	12613	chr2	28555820	28563403	-	2066	1	Cel
NM_009887	NM_009887	12622	chr4	82881751	82885151	-	1738	1	Cer1
NM_009892	NM_009892	12655	chr3	106147554	106167564	-	1526	1	Chil3
NM_001136056	NM_001136056	12804	chr4	41657498	41695445	-	1987	1	Cntfr
NM_181277	NM_181277	12818	chr15	55307750	55520803	+	6398	1	Col14a1
NM_015734	NM_015734	12831	chr2	27886425	28039510	+	8334	1	Col5a1
NM_001243009	NM_001243009	12835	chr1	90766860	90843971	-	8977	1	Col6a3
NM_016685	NM_016685	12845	chr8	70373548	70382066	+	2405	1	Comp
NM_013496	NM_013496	12903	chr9	54764748	54773110	+	796	1	Crabp1
NM_007762	NM_007762	12921	chr11	104132781	104175523	+	2519	1	Crhr1
NM_007775	NM_007775	12966	chr1	65071525	65073532	-	621	1	Crygc
NM_007805	NM_007805	13056	chr11	105933704	105944147	-	2466	1	Cyb561
NM_007809	NM_007809	13074	chr19	46667165	46673000	-	1831	1	Cyp17a1
NM_009995	NM_009995	13079	chr17	34801348	34804426	-	1911	1	Cyp21a1
NM_010005	NM_010005	13101	chr15	82402846	82407194	-	1636	1	Cyp2d10
NM_021282	NM_021282	13106	chr7	140763832	140774977	+	1725	1	Cyp2e1
NM_007819	NM_007819	13113	chr5	137892933	137921619	-	2940	1	Cyp3a13
NM_001038610	NM_001038610	13134	chr14	97786846	98169765	-	5279	1	Dach1
NM_007827	NM_007827	13137	chr1	130388528	130422999	-	1312	1	Cd55b
NM_007840	NM_007840	13207	chr11	106780356	106788494	-	3505	1	Ddx5
NM_007855	NM_007855	13345	chr1	91801461	91848034	+	1331	1	Twist2
NM_010043	NM_010043	13346	chr1	75360292	75368579	+	3054	1	Des
NM_010051	NM_010051	13380	chr19	30545885	30549496	-	2230	1	Dkk1
NM_010057	NM_010057	13396	chr6	6863334	6867970	+	1065	1	Dlx6
NM_013811	NM_013811	13417	chr17	30626936	30875264	+	14488	1	Dnah8
NM_007877	NM_007877	13490	chr16	43762242	43822839	+	1333	1	Drd3
NM_007883	NM_007883	13511	chr18	20558116	20604526	+	5712	1	Dsg2
NM_010091	NM_010091	13542	chr4	155847317	155859303	+	3426	1	Dvl1
NM_007893	NM_007893	13560	chr17	24443778	24455392	-	2640	1	E4f1
NM_010100	NM_010100	13608	chr10	58600788	58675696	-	3666	1	Edar
NM_010102	NM_010102	13611	chr10	81497745	81500137	-	2390	1	S1pr4
NM_007903	NM_007903	13616	chr2	174760758	174784042	+	2971	1	Edn3
NM_010111	NM_010111	13642	chr8	8617439	8660773	-	4312	1	Efnb2
NM_207655	NM_207655	13649	chr11	16752203	16913907	+	5935	1	Egfr
NM_010120	NM_010120	13664	chr18	46597704	46610225	+	2874	1	Eif1a
NM_010330	NM_010330	13723	chr13	117220573	117274415	+	2611	1	Emb
NM_010140	NM_010140	13837	chr16	63545218	63864157	-	3959	1	Epha3
NM_001122889	NM_001122889	13841	chr4	28813145	28947453	+	3260	1	Epha7
NM_010142	NM_010142	13844	chr4	136647541	136836012	-	10906	1	Ephb2
NM_007940	NM_007940	13850	chr14	66084372	66124522	-	2041	1	Ephx2
NM_010151	NM_010151	13865	chr13	78188973	78198982	-	2427	1	Nr2f1
NM_001003817	NM_001003817	13866	chr11	98412484	98437716	+	4969	1	Erbb2
NM_010154	NM_010154	13869	chr1	68032187	69108059	-	12007	1	Erbb4
NM_007954	NM_007954	13884	chr8	93099016	93131283	-	1824	1	Ces1c
NM_133660	NM_133660	13897	chr8	93201218	93229619	-	2057	1	Ces1e
NM_007957	NM_007957	13984	chrX	137115397	137120326	-	1593	1	Esx1
NM_010158	NM_010158	13992	chr15	68928420	69093518	+	1882	1	Khdrbs3
NM_001110231	NM_001110231	14007	chr2	6539699	7396198	-	9068	1	Celf2
NM_001252192	NM_001252192	14048	chr1	14168958	14310199	-	4195	1	Eya1
NM_010174	NM_010174	14077	chr4	130308778	130315463	+	634	1	Fabp3
NM_007984	NM_007984	14086	chr5	142960355	142973189	+	2660	1	Fscn1
NM_001081286	NM_001081286	14107	chr8	44950208	45052257	+	14599	1	Fat1
NM_007992	NM_007992	14115	chr6	91212764	91272540	+	4457	1	Fbln2
NM_010181	NM_010181	14119	chr18	58008623	58209926	-	10413	1	Fbn2
NM_008000	NM_008000	14158	chr17	63937972	64139496	+	2351	1	Fer
NM_010197	NM_010197	14164	chr18	38838673	38918699	-	3903	1	Fgf1
NM_008002	NM_008002	14165	chr13	118714699	118792573	+	4567	1	Fgf10
NM_001276420	NM_001276420	14167	chr16	28396945	28446075	-	2523	1	Fgf12
NM_010201	NM_010201	14169	chr14	123978291	124192546	-	2817	1	Fgf14
NM_001277268	NM_001277268	14176	chr5	98254184	98277033	+	2396	1	Fgf5
NM_010204	NM_010204	14177	chr6	127015542	127024718	+	1227	1	Fgf6
NM_008011	NM_008011	14186	chr13	55152818	55168759	+	3126	1	Fgfr4
NM_010221	NM_010221	14230	chr11	100415694	100424840	+	2591	1	Fkbp10
NM_010222	NM_010222	14231	chr2	76663034	76673098	-	892	1	Fkbp7
NM_001161765	NM_001161765	14263	chr3	97628838	97655287	+	5275	1	Fmo5
NM_008042	NM_008042	14294	chr17	17970458	17971677	+	1217	1	Fpr3
NM_010237	NM_010237	14302	chr10	34483400	34611230	+	4636	1	Frk
NM_001271993	NM_001271993	14344	chr7	45648591	45666394	-	3054	1	Fut2
NM_019468	NM_019468	14380	chr5	61808843	61810477	+	1632	1	G6pd2
NM_010250	NM_010250	14394	chr11	42130940	42182930	-	4675	1	Gabra1
NM_010251	NM_010251	14397	chr5	71569734	71658308	-	4112	1	Gabra4
NM_010252	NM_010252	14405	chr5	70751047	70842617	-	4760	1	Gabrg1
NM_144512	NM_144512	14412	chr6	121300296	121337718	+	2133	1	Slc6a13
NM_008079	NM_008079	14420	chr12	98202300	98259459	-	3807	1	Galc
NM_008091	NM_008091	14462	chr2	9857078	9878600	-	3207	1	Gata3
NM_133219	NM_133219	14538	chr13	40917634	40960892	+	4000	1	Gcnt2
NM_001163282	NM_001163282	14559	chr8	70315775	70331592	+	2718	1	Gdf1
NM_010278	NM_010278	14581	chr5	107716655	107724343	-	2854	1	Gfi1
NM_010281	NM_010281	14590	chr4	20042052	20066111	+	1315	1	Ggh
NM_008123	NM_008123	14616	chr3	96913566	96926051	-	6967	1	Gja8
NM_008133	NM_008133	14661	chr14	34310727	34345033	+	3143	1	Glud1
NM_008141	NM_008141	14686	chr3	108093066	108101430	+	1764	1	Gnat2
NM_001081088	NM_001081088	14725	chr2	69424335	69586067	-	15386	1	Lrp2
NM_010338	NM_010338	14763	chr6	25668523	25689980	-	3201	1	Gpr37
NM_010340	NM_010340	14765	chrX	71663667	71669257	+	3065	1	Gpr50
NM_008167	NM_008167	14804	chr6	63256857	64666279	+	3007	1	Grid2
NM_008170	NM_008170	14811	chr16	9577710	9992533	-	4499	1	Grin2a
NM_010374	NM_010374	14943	chr14	56205263	56211407	-	902	1	Gzmf
NM_013544	NM_013544	14985	chr17	36322860	36326150	-	1380	1	H2-M10.1
NM_010401	NM_010401	15109	chr10	93488768	93516743	+	2736	1	Hal
NM_010403	NM_010403	15112	chr2	134497361	134554352	-	2019	1	Hao1
NM_008217	NM_008217	15118	chr8	106870242	106882902	+	5906	1	Has3
NM_008219	NM_008219	15132	chr7	103841638	103843162	-	605	1	Hbb-bh1
NM_010425	NM_010425	15221	chr4	99656299	99658671	+	2370	1	Foxd3
NM_008264	NM_008264	15398	chr6	52258853	52260880	-	1309	1	Hoxa13
NM_010455	NM_010455	15404	chr6	52215624	52218573	-	1947	1	Hoxa7
NM_017370	NM_017370	15439	chr8	109575128	109579172	-	1338	1	Hp
NM_153193	NM_153193	15493	chr3	98711107	98724543	-	1792	1	Hsd3b2
NM_008295	NM_008295	15496	chr3	98618636	98645534	-	1601	1	Hsd3b5
NM_008304	NM_008304	15529	chr15	32920723	33034721	+	3306	1	Sdc2
NM_008305	NM_008305	15530	chr4	137468803	137570630	+	14078	1	Hspg2
NM_008308	NM_008308	15550	chr13	105443693	105448133	+	4438	1	Htr1a
NM_001285484	NM_001285484	15552	chr4	136424612	136444401	+	2790	1	Htr1d
NM_021358	NM_021358	15565	chr4	139061409	139074789	-	1357	1	Htr6
NM_008317	NM_008317	15586	chr9	107576952	107580133	+	2169	1	Hyal1
NM_008343	NM_008343	16009	chr11	7206091	7213923	-	2435	1	Igfbp3
NM_008355	NM_008355	16163	chr11	53631323	53634702	-	1200	1	Il13
NM_008373	NM_008373	16198	chr13	56479277	56482246	-	529	1	Il9
NM_008386	NM_008386	16333	chr19	52264297	52265009	+	591	1	Ins1
NM_001185084	NM_001185084	16334	chr7	142678656	142679726	-	579	1	Ins2
NM_021459	NM_021459	16392	chr13	116298270	116309688	-	2518	1	Isl1
NM_008409	NM_008409	16431	chrX	107397195	107403360	-	1624	1	Itm2a
NM_176847	NM_176847	16470	chr11	115315192	115321918	-	3178	1	Ush1g
NM_145983	NM_145983	16493	chr6	126532551	126535555	-	3002	1	Kcna5
NM_010600	NM_010600	16510	chr1	192190777	192510159	+	7226	1	Kcnh1
NM_001039484	NM_001039484	16513	chr1	172341210	172374085	+	5403	1	Kcnj10
NM_008426	NM_008426	16519	chr2	55435970	55598145	+	5209	1	Kcnj3
NM_008428	NM_008428	16523	chr6	142564939	142571356	-	2183	1	Kcnj8
NM_008430	NM_008430	16525	chr8	125995102	126030688	+	2301	1	Kcnk1
NM_001081133	NM_001081133	16558	chr2	142618345	142901464	-	5417	1	Kif16b
NM_008449	NM_008449	16574	chr2	49619314	49774778	+	6812	1	Kif5c
NM_001170851	NM_001170851	16633	chr6	131219235	131247362	-	1875	1	Klra2
NM_010658	NM_010658	16658	chr2	160363677	160367065	-	3386	1	Mafb
NM_008486	NM_008486	16790	chr7	79821803	79842352	-	3401	1	Anpep
NM_010687	NM_010687	16795	chr8	72814599	73352556	-	3652	1	Large
NM_008490	NM_008490	16816	chr8	105939551	105943402	-	1354	1	Lcat
NM_001159579	NM_001159579	16924	chr5	74597104	74677872	-	2319	1	Lnx1
NM_008516	NM_008516	16979	chr6	107529726	107570228	+	3752	1	Lrrn1
NM_001252058	NM_001252058	17067	chr15	75045473	75048663	-	702	1	Ly6c1
NM_008530	NM_008530	17071	chr15	75268421	75272234	+	871	1	Ly6f
NM_013591	NM_013591	17123	chr10	79664574	79668536	+	1413	1	Madcam1
NM_008539	NM_008539	17125	chr8	79338398	79399468	-	3037	1	Smad1
NM_010766	NM_010766	17167	chr1	120474538	120505084	-	1966	1	Marco
NM_008561	NM_008561	17201	chr2	172248492	172251114	+	2620	1	Mc3r
NM_008567	NM_008567	17219	chr1	128331575	128359705	-	2947	1	Mcm6
NM_010781	NM_010781	17229	chr17	25366333	25368092	+	1080	1	Tpsb2
NM_010789	NM_010789	17268	chr11	18880428	19018969	-	3332	1	Meis1
NM_008591	NM_008591	17295	chr6	17463957	17573980	+	6628	1	Met
NM_008598	NM_008598	17314	chr7	136894611	137128188	+	812	1	Mgmt
NM_001039543	NM_001039543	17349	chr3	67374097	67400000	+	1151	1	Mlf1
NM_019724	NM_019724	17389	chr4	17853482	18118734	+	4564	1	Mmp16
NM_181452	NM_181452	17826	chr19	5728087	5729666	-	1208	1	Fam89b
NM_008657	NM_008657	17878	chr10	107492860	107494729	-	1243	1	Myf6
NM_010867	NM_010867	17929	chr17	71019557	71126856	+	5573	1	Myom1
NM_001171615	NM_001171615	17932	chr2	181763332	181827775	+	5280	1	Myt1
NM_010871	NM_010871	17952	chr13	100281121	100316616	-	6689	1	Naip6
NM_008673	NM_008673	17960	chr8	67490758	67492103	+	1343	1	Nat1
NM_033217	NM_033217	18053	chr11	95568821	95587698	-	3398	1	Ngfr
NM_008712	NM_008712	18125	chr5	117866839	117958840	+	9665	1	Nos1
NM_008729	NM_008729	18163	chr15	30172593	31029343	+	5921	1	Ctnnd2
NM_001077404	NM_001077404	18187	chr1	62703317	62818692	+	6705	1	Nrp2
NM_008746	NM_008746	18213	chr7	78192114	78577838	-	2959	1	Ntrk3
NM_022563	NM_022563	18214	chr1	169972307	170088944	-	8271	1	Ddr2
NM_008752	NM_008752	18232	chr2	23321246	23401973	+	2575	1	Nxph2
NM_010951	NM_010951	18241	chrX	152781921	152808646	+	1640	1	Gpr143
NM_008760	NM_008760	18295	chr13	49608071	49624500	+	2531	1	Ogn
NM_010983	NM_010983	18317	chr7	107000875	107002605	-	1246	1	Olfr2
NM_010999	NM_010999	18356	chr11	49050733	49135387	+	1922	1	Olfr56
NM_001081147	NM_001081147	18430	chr6	112473684	112489808	-	4564	1	Oxtr
NM_008780	NM_008780	18503	chr2	147364994	147375048	+	2631	1	Pax1
NM_183355	NM_183355	18514	chr1	168153527	168432169	-	7152	1	Pbx1
NM_017463	NM_017463	18515	chr17	34592471	34597341	+	2790	1	Pbx2
NM_001098170	NM_001098170	18526	chr3	45378398	45434579	+	6057	1	Pcdh10
NM_008796	NM_008796	18559	chr11	89982544	90002894	-	2836	1	Pctp
NM_008824	NM_008824	18639	chrX	150589921	150643878	+	1723	1	Pfkfb1
NM_008849	NM_008849	18736	chr16	65520629	65533981	+	869	1	Pou1f1
NM_011098	NM_011098	18741	chr3	129199878	129219594	+	1939	1	Pitx2
NM_011109	NM_011109	18782	chr4	138775735	138782143	+	2258	1	Pla2g2d
NM_001141927	NM_001141927	18821	chr10	53337686	53345999	+	2475	1	Pln
NM_008901	NM_008901	18994	chrX	110814379	110819108	+	4727	1	Pou3f4
NM_138944	NM_138944	18997	chr8	78433009	78436652	-	3208	1	Pou4f2
NR_027710	NR_027710	19017	chr5	51454249	51553921	-	6482	1	Ppargc1a
NM_001004025	NM_001004025	19059	chr4	49678747	49681983	-	2981	1	Ppp3r2
NM_008926	NM_008926	19092	chr5	98929773	99037079	-	4675	1	Prkg2
NM_011174	NM_011174	19131	chr6	132569842	132572401	+	867	1	Prh1
NM_011190	NM_011190	19188	chr14	55587440	55591021	-	884	1	Psme2
NM_013643	NM_013643	19259	chr7	47077800	47133684	-	3116	1	Ptpn5
NM_007547	NM_007547	19261	chr2	129593169	129632228	+	4008	1	Sirpa
NM_008981	NM_008981	19270	chr14	11553553	12242039	+	9158	1	Ptprg
NM_008983	NM_008983	19272	chr10	28074820	28597397	+	6143	1	Ptprk
NM_008987	NM_008987	19288	chr3	66219887	66225806	+	1917	1	Ptx3
NM_008988	NM_008988	19289	chr9	65141189	65185870	+	3128	1	Igdcc3
NM_009026	NM_009026	19416	chr11	59963181	59964944	-	1607	1	Rasd1
NM_009027	NM_009027	19418	chr13	91880407	91988042	-	5827	1	Rasgrf2
NM_011261	NM_011261	19699	chr5	21884454	22344705	-	11632	1	Reln
NM_009060	NM_009060	19733	chrX	20549818	20562087	+	1565	1	Rgn
NM_001165934	NM_001165934	19739	chr11	109229856	109298181	-	7610	1	Rgs9
NM_011278	NM_011278	19822	chr5	34336250	34353445	+	3081	1	Rnf4
NM_009085	NM_009085	20016	chr17	46243920	46248045	-	1294	1	Polr1c
NM_001136227	NM_001136227	20166	chr6	83135808	83152579	+	2181	1	Rtkn
NM_009122	NM_009122	20230	chr17	51736187	51832647	-	6205	1	Satb1
NM_001272023	NM_001272023	20277	chr7	121865038	121918728	+	2682	1	Scnn1b
NM_011332	NM_011332	20295	chr8	94810453	94812036	+	509	1	Ccl17
NM_011345	NM_011345	20339	chr1	164048234	164057677	+	2896	1	Sele
NM_001271407	NM_001271407	20410	chr14	70180468	70206022	-	3038	1	Sorbs3
NM_011372	NM_011372	20447	chr3	153202509	153725133	-	3878	1	St6galnac3
NM_011377	NM_011377	20465	chr16	94085260	94127032	+	3657	1	Sim2
NM_011380	NM_011380	20472	chr17	85684268	85688254	-	2104	1	Six2
NM_011388	NM_011388	20494	chr8	5085623	5105232	-	1621	1	Slc10a2
NM_021712	NM_021712	20508	chr14	32462437	32464850	-	2411	1	Slc18a3
NM_011402	NM_011402	20531	chr5	53049353	53071663	+	4159	1	Slc34a2
NM_009215	NM_009215	20604	chr16	23889581	23890844	-	595	1	Sst
NM_009218	NM_009218	20607	chr15	78537015	78544345	-	3923	1	Sstr3
NM_001191008	NM_001191008	20609	chr17	25489875	25497288	-	2577	1	Sstr5
NM_011428	NM_011428	20614	chr2	136713450	136782428	+	2109	1	Snap25
NM_009234	NM_009234	20666	chr12	27334268	27342718	-	8448	1	Sox11
NM_001277328	NM_001277328	20679	chr7	115470872	115801609	-	8395	1	Sox6
NM_011447	NM_011447	20681	chr17	25565893	25570686	-	2994	1	Sox8
NM_011449	NM_011449	20686	chr9	37603294	37613720	-	683	1	Spa17
NM_011453	NM_011453	20707	chr13	33149275	33158351	-	1876	1	Serpinb9c
NM_009250	NM_009250	20713	chr3	75557533	75642523	+	3122	1	Serpini1
NM_011464	NM_011464	20733	chr7	29256330	29281977	-	1451	1	Spint2
NM_001166465	NM_001166465	20745	chr13	57421195	57908332	-	3120	1	Spock1
NM_011474	NM_011474	20762	chr3	92385685	92387319	+	743	1	Sprr2h
NM_009279	NM_009279	20832	chrX	73787143	73790828	+	678	1	Ssr4
NM_011491	NM_011491	20856	chr11	31359441	31370061	-	1787	1	Stc2
NM_133670	NM_133670	20887	chr7	126672870	126676357	-	1361	1	Sult1a1
NM_016663	NM_016663	20981	chr7	44384126	44400030	+	2485	1	Syt3
NM_009313	NM_009313	21336	chr6	82402475	82560104	+	5018	1	Tacr1
NM_001286340	NM_001286340	21419	chr1	19208914	19238845	+	3821	1	Tfap2b
NM_009335	NM_009335	21420	chr2	172549593	172558621	+	2828	1	Tfap2c
NM_031198	NM_031198	21426	chr6	16833381	16898441	-	1770	1	Tfec
NM_001282007	NM_001282007	21689	chr11	72344717	72361296	-	1398	1	Tekt1
NM_009378	NM_009378	21824	chr2	148404471	148408188	-	3715	1	Thbd
NM_011581	NM_011581	21826	chr17	14665500	14694262	-	5898	1	Thbs2
NM_001145887	NM_001145887	21844	chr16	89787111	89818352	-	4173	1	Tiam1
NM_011598	NM_011598	21884	chr3	10193624	10197283	-	640	1	Fabp9
NM_011600	NM_011600	21888	chr19	14448072	14598183	-	4733	1	Tle4
NM_021883	NM_021883	21916	chr4	46039222	46116032	+	2859	1	Tmod1
NM_011607	NM_011607	21923	chr4	63959785	64047015	-	7072	1	Tnc
NM_011614	NM_011614	21944	chr11	69686240	69696098	-	1685	1	Tnfsf12
NM_009403	NM_009403	21949	chr4	63832824	63861284	-	2222	1	Tnfsf8
NM_022312	NM_022312	21960	chr1	159523769	159924922	+	5370	1	Tnr
NM_027884	NM_027884	21961	chr1	73910231	74124447	-	9930	1	Tns1
NM_001164792	NM_001164792	21983	chr9	85842852	85847055	+	3505	1	Tpbg
NM_009426	NM_009426	22044	chr6	92242061	92244650	-	1379	1	Trh
NM_001126331	NM_001126331	22062	chr4	154056249	154097173	-	4456	1	Trp73
NR_027507	NR_027507	22109	chrY	1055764	1058868	-	317	1	Tspy-ps
NM_009434	NM_009434	22113	chr7	143501548	143502524	-	733	1	Phlda2
NM_009437	NM_009437	22117	chr15	78399556	78405859	-	1092	1	Tst
NM_009449	NM_009449	22147	chr6	145615963	145621477	+	1560	1	Tuba3b
NM_011655	NM_011655	22154	chr17	35833920	35838301	-	2639	1	Tubb5
NM_021478	NM_021478	22157	chr17	28351519	28365143	-	1991	1	Tulp1
NM_021290	NM_021290	22226	chr5	31137989	31138895	-	640	1	Ucn
NM_011674	NM_011674	22239	chr3	125865343	125938550	-	3591	1	Ugt8a
NM_013702	NM_013702	22255	chr5	139543898	139548178	+	2088	1	Uncx
NM_013839	NM_013839	22259	chr2	91184061	91195035	-	1943	1	Nr1h3
NM_021408	NM_021408	22283	chr1	188262838	188965039	+	15816	1	Ush2a
NR_038052	NR_038052	22314	chr4	156331103	156339496	+	2556	1	Vmn2r-ps159
NM_009521	NM_009521	22415	chr11	103774175	103818021	+	3108	1	Wnt3
NM_011741	NM_011741	22635	chr5	137378637	137477064	-	16391	1	Zan
NM_011773	NM_011773	22784	chr5	31086106	31093527	-	1991	1	Slc30a3
NM_011782	NM_011782	23794	chr16	85858157	85901125	-	8094	1	Adamts5
NM_011786	NM_011786	23801	chr11	69126377	69149115	+	2521	1	Aloxe3
NM_011800	NM_011800	23836	chr1	104768819	104995481	+	3708	1	Cdh20
NM_001085376	NM_001085376	23850	chr1	158711731	158957438	-	8562	1	Pappa2
NM_011821	NM_011821	23888	chr14	116925297	117979529	+	6739	1	Gpc6
NM_011825	NM_011825	23893	chr1	174833785	174921819	-	3741	1	Grem2
NM_011834	NM_011834	23923	chr8	60506124	60545677	+	1765	1	Aadat
NM_011839	NM_011839	23937	chr3	86545581	86548283	-	2700	1	Mab21l2
NM_001199003	NM_001199003	24012	chr1	175059076	175492545	-	2467	1	Rgs7
NM_013709	NM_013709	24057	chr12	30911669	30960160	+	1735	1	Sh3yl1
NM_011920	NM_011920	26357	chr6	58596672	58692451	+	2473	1	Abcg2
NM_007593	NM_007593	26369	chr18	9618419	9619469	-	1048	1	Cetn1
NM_001243792	NM_001243792	26381	chr1	187609006	188214884	+	5344	1	Esrrg
NM_011940	NM_011940	26388	chr1	173962569	173982844	-	1784	1	Ifi202b
NM_011943	NM_011943	26399	chr11	110399122	110513637	+	2050	1	Map2k6
NM_011990	NM_011990	26570	chr3	50364936	50443613	-	9213	1	Slc7a11
NM_011994	NM_011994	26874	chr15	91145871	91191807	-	5528	1	Abcd2
NM_172974	NM_172974	26895	chr1	86587100	86606500	+	2222	1	Cops7b
NM_012035	NM_012035	26946	chr13	56773098	56895789	-	3536	1	Trpc7
NM_012054	NM_012054	27052	chr13	20794113	21024254	+	2900	1	Aoah
NM_013737	NM_013737	27226	chr17	43568451	43612201	+	1901	1	Pla2g7
NM_013751	NM_013751	27281	chr16	29209695	29230530	+	2909	1	Hrasls
NM_013753	NM_013753	27355	chr10	61319657	61383523	-	4252	1	Pald1
NM_013761	NM_013761	27364	chr11	74906359	74925798	-	3688	1	Srr
NM_001163218	NM_001163218	27372	chr13	27198903	27203750	+	846	1	Prl3c1
NM_138582	NM_138582	27762	chr17	35016579	35026741	+	4294	1	Vwa7
NM_023746	NM_023746	28078	chr13	28142484	28151595	+	1038	1	Prl5a1
NM_080285	NM_080285	30785	chr6	18366477	18514825	-	5906	1	Cttnbp2
NM_013913	NM_013913	30924	chr4	99030954	99038192	+	1600	1	Angptl3
NM_013920	NM_013920	30942	chr3	3508030	3659800	+	4168	1	Hnf4g
NM_013922	NM_013922	30944	chr11	50811085	50827731	-	5360	1	Zfp354c
NM_001081168	NM_001081168	50724	chr11	57801637	57810615	+	1543	1	Sap30l
NM_015820	NM_015820	50787	chr14	119138265	119869815	+	1780	1	Hs6st3
NM_018885	NM_018885	50916	chr13	73260497	73269620	+	2593	1	Irx4
NM_016970	NM_016970	50928	chr6	122270597	122282833	-	1357	1	Klrg1
NM_001252347	NM_001252347	51799	chr11	102393403	102402939	+	3033	1	Rundc3a
NM_033560	NM_033560	52348	chr8	40511783	40551134	+	6366	1	Vps37a
NM_001170868	NM_001170868	52589	chr15	37366175	37459382	-	3414	1	Ncald
NM_001039168	NM_001039168	52897	chr11	118489760	118909572	-	4384	1	Rbfox3
NM_016736	NM_016736	53312	chr5	24685815	24710378	+	3261	1	Nub1
NM_016764	NM_016764	53381	chrX	155323918	155338460	-	974	1	Prdx4
NM_016866	NM_016866	53416	chr2	68210447	68471981	-	3227	1	Stk39
NM_016677	NM_016677	53602	chr12	17690814	17791926	+	1555	1	Hpcal1
NM_017388	NM_017388	53876	chr14	44102887	44103357	+	469	1	Ear3
NM_017394	NM_017394	53896	chr7	35186385	35201111	+	1937	1	Slc7a10
NM_001289653	NM_001289653	54003	chr15	95219440	95528252	-	3145	1	Nell2
NR_045611	NR_045611	54131	chr7	44997648	45002848	+	2181	1	Irf3
NM_016847	NM_016847	54140	chr10	122448499	122453453	+	2667	1	Avpr1a
NM_019398	NM_019398	54159	chr14	51162260	51163018	+	756	1	Rnase2b
NM_001122758	NM_001122758	54216	chr5	57718081	58133235	+	8671	1	Pcdh7
NM_019441	NM_019441	54397	chr17	34616662	34627148	-	1742	1	Ppt2
NM_001136260	NM_001136260	54403	chr5	88887260	89239656	+	7368	1	Slc4a4
NM_019446	NM_019446	54422	chr2	28907680	28916421	-	3669	1	Barhl1
NM_001146087	NM_001146087	54450	chr2	24276954	24282432	+	1840	1	Il1f5
NM_001276680	NM_001276680	54524	chr3	103576126	103645567	+	1850	1	Syt6
NM_173067	NM_173067	54525	chr19	10389090	10453181	+	6462	1	Syt7
NM_018779	NM_018779	54611	chr6	141249269	141499351	+	4187	1	Pde3a
NM_001001488	NM_001001488	54670	chr18	64528979	64661000	-	6410	1	Atp8b1
NM_080433	NM_080433	54713	chr14	12341892	12345865	-	2297	1	Fezf2
NM_018867	NM_018867	55987	chr7	132042810	132154741	-	3490	1	Cpxm2
NM_018859	NM_018859	56043	chr13	4592490	4609164	-	1701	1	Akr1e1
NM_019536	NM_019536	56087	chr5	124725085	124834308	+	13957	1	Dnah10
NM_019544	NM_019544	56184	chr12	11208382	11208948	-	565	1	Msgn1
NM_018785	NM_018785	56194	chr2	53138476	53191187	-	3537	1	Prpf40a
NM_019563	NM_019563	56222	chr4	120666563	120667820	+	1255	1	Cited4
NM_019799	NM_019799	56315	chr7	79593363	79617657	-	2077	1	Rhcg
NM_019790	NM_019790	56363	chr1	50927523	51187270	+	3327	1	Tmeff2
NM_029565	NM_029565	56374	chr4	107178630	107200996	+	1534	1	Tmem59
NM_001284328	NM_001284328	56403	chr9	88449364	88482397	-	6916	1	Syncrip
NM_019789	NM_019789	56461	chr2	127456498	127521392	-	2743	1	Kcnip3
NM_019723	NM_019723	56517	chr11	53950824	53980027	-	2285	1	Slc22a21
NM_019960	NM_019960	56534	chr13	113662896	113663676	-	778	1	Hspb3
NM_019946	NM_019946	56615	chr6	138140537	138156752	+	937	1	Mgst1
NM_019964	NM_019964	56691	chr6	88222268	88223256	+	986	1	Dnajb8
NM_019967	NM_019967	56710	chr4	68761372	68954397	-	3344	1	Brinp1
NM_019998	NM_019998	56737	chr4	47469833	47474367	-	3051	1	Alg2
NM_001253916	NM_001253916	56747	chr5	112419151	112577198	-	6061	1	Sez6l
NM_020265	NM_020265	56811	chr3	132085292	132180304	+	3699	1	Dkk2
NM_001289757	NM_001289757	56874	chr5	29195993	29225524	+	1594	1	Rnf32
NM_020502	NM_020502	57253	chr6	40493592	40494485	+	892	1	Tas2r108
NM_020510	NM_020510	57265	chr11	102604431	102608058	+	3625	1	Fzd2
NM_019568	NM_019568	57266	chr13	56288643	56296551	-	1821	1	Cxcl14
NM_018758	NM_018758	57267	chr10	81268172	81273247	+	2094	1	Apba3
NM_020568	NM_020568	57435	chr17	56100591	56109802	-	5744	1	Plin4
NM_021307	NM_021307	57745	chr7	24112320	24127952	+	3500	1	Zfp112
NM_021342	NM_021342	57814	chr1	78816949	78820025	+	2459	1	Kcne4
NM_021399	NM_021399	58208	chr12	107910403	108003414	-	7702	1	Bcl11b
NM_026907	NM_026907	58210	chr11	121053423	121063569	-	2315	1	Sectm1b
NM_021416	NM_021416	58227	chr5	45529705	45639501	-	4105	1	Fam184b
NM_021423	NM_021423	58234	chr15	89499857	89560260	+	7106	1	Shank3
NM_021448	NM_021448	58523	chr18	24603961	24638830	+	2765	1	Elp2
NM_021453	NM_021453	58803	chr19	10668957	10678071	-	1405	1	Pga5
NM_021503	NM_021503	59006	chr3	123006206	123034987	-	1145	1	Myoz2
NM_021507	NM_021507	59010	chr2	122781999	122809551	+	1971	1	Sqrdl
NM_021527	NM_021527	59030	chr2	136873781	136891406	-	3186	1	Mkks
NM_021532	NM_021532	59036	chr12	71309884	71320107	+	3644	1	Dact1
NM_021607	NM_021607	59287	chr1	172066013	172082749	-	2836	1	Ncstn
NM_016885	NM_016885	59308	chr3	137341078	137431069	+	1409	1	Emcn
NM_001267846	NM_001267846	60344	chr2	63971508	64098038	-	9811	1	Fign
NM_001146275	NM_001146275	60440	chr18	60376029	60392629	+	3118	1	Iigp1
NM_021892	NM_021892	60531	chr6	50650871	50654393	-	563	1	Npvf
NM_001110807	NM_001110807	60594	chr7	28881656	28893585	+	2805	1	Capn12
NM_022025	NM_022025	63993	chr17	54273590	54299034	-	5169	1	Slc5a7
NM_001204335	NM_001204335	64385	chr17	32905070	32917342	-	2193	1	Cyp4f14
NM_144960	NM_144960	64435	chr1	130800902	130814740	+	1734	1	Fcamr
NM_022657	NM_022657	64654	chr6	127072902	127082296	+	2697	1	Fgf23
NM_001166157	NM_001166157	64818	chr15	101459061	101463765	-	1846	1	Krt81
NM_022883	NM_022883	64899	chr2	160880670	160906000	+	3451	1	Lpin3
NM_023048	NM_023048	65255	chr6	5383386	5433021	+	3277	1	Asb4
NM_025318	NM_025318	66048	chr11	73175503	73177042	-	1349	1	Emc6
NM_001163526	NM_001163526	66166	chr3	90526849	90528835	+	926	1	S100a14
NM_023168	NM_023168	66168	chr15	76246807	76249904	+	1684	1	Grina
NM_176830	NM_176830	66180	chr11	100408750	100414819	-	1857	1	P3h4
NM_025446	NM_025446	66253	chr10	13652709	13868830	-	1046	1	Aig1
NR_027826	NR_027826	66297	chr1	42648200	42694825	-	542	1	Pantr1
NM_025510	NM_025510	66358	chr11	67037880	67052618	-	1485	1	Adprm
NM_001042592	NM_001042592	66412	chr7	68736994	68749238	-	3893	1	Arrdc4
NM_183257	NM_183257	66438	chr7	30922372	30924181	-	432	1	Hamp2
NM_025583	NM_025583	66473	chr8	111686510	111691010	-	878	1	Ctrb1
NM_025595	NM_025595	66493	chr6	125192200	125194392	+	1510	1	Mrpl51
NM_025611	NM_025611	66515	chr17	46650338	46664364	+	5501	1	Cul7
NM_001081246	NM_001081246	66605	chr10	100592386	100618391	+	1675	1	1700017N19Rik
NM_025696	NM_025696	66673	chr19	48206025	48805505	+	5605	1	Sorcs3
NM_025697	NM_025697	66674	chr14	61531851	61556886	-	4137	1	Spryd7
NM_025741	NM_025741	66745	chr19	30003790	30006020	+	2228	1	Trpd52l3
NM_025746	NM_025746	66755	chr1	23100474	23102253	-	1777	1	4933415F23Rik
NM_025749	NM_025749	66758	chr18	52615915	52639830	+	1926	1	Zfp474
NR_033783	NR_033783	66770	chr14	48878873	48887112	+	1625	1	4933429O19Rik
NR_105026	NR_105026	66785	chr9	61103012	61105386	-	1844	1	4933433G08Rik
NM_025809	NM_025809	66864	chr12	58264720	58269258	-	4536	1	Clec14a
NM_001033851	NM_001033851	66871	chr15	90643323	90679388	-	694	1	Cpne8
NM_025835	NM_025835	66904	chr9	100982032	101034884	-	2289	1	Pccb
NM_025862	NM_025862	66948	chr9	26974139	26999549	-	2851	1	Acad8
NM_001078649	NM_001078649	66990	chr19	4125960	4132307	+	1507	1	Tmem134
NM_194334	NM_194334	67016	chr9	90202049	90270769	-	5919	1	Tbc1d2b
NM_001039494	NM_001039494	67077	chr19	6922426	6925380	-	774	1	Tex40
NM_144953	NM_144953	67080	chr1	52925127	52952840	-	830	1	1700019D03Rik
NM_025989	NM_025989	67133	chr7	119442544	119459272	-	1965	1	Gp2
NM_144882	NM_144882	67198	chr1	57774861	57948397	+	3916	1	Spats2l
NM_026037	NM_026037	67216	chr12	24831599	24960299	+	2785	1	Mboat2
NM_145456	NM_145456	67263	chr13	107724617	107890064	-	5440	1	Zswim6
NM_023852	NM_023852	67295	chr13	110054187	110280206	-	8493	1	Rab3c
NM_026082	NM_026082	67299	chr4	98936659	99120915	-	6999	1	Dock7
NR_033784	NR_033784	67319	chr9	57175275	57186110	+	391	1	1700041C23Rik
NR_033785	NR_033785	67321	chr18	49523289	49524441	+	376	1	1700044K03Rik
NR_045397	NR_045397	67325	chr5	112582936	112589996	-	1045	1	1700034G24Rik
NR_015458	NR_015458	67330	chr1	182300834	182303289	+	684	1	1700047M11Rik
NR_027865	NR_027865	67336	chr6	112210708	112212518	+	448	1	1700054K19Rik
NR_033786	NR_033786	67340	chr12	80923432	80924447	-	375	1	1700052I22Rik
NM_001163768	NM_001163768	67344	chr4	102991795	103005594	+	1898	1	Tctex1d1
NR_038129	NR_038129	67351	chr5	127256860	127281623	-	797	1	Tmem132cos
NM_023844	NM_023844	67374	chr16	84774123	84826375	+	4805	1	Jam2
NM_026130	NM_026130	67398	chr9	35211203	35217003	+	2918	1	Srpr
NM_026189	NM_026189	67484	chr9	25481597	25604110	+	2663	1	Eepd1
NM_026200	NM_026200	67498	chr15	45106284	45114934	-	4491	1	Kcnv1
NM_026281	NM_026281	67623	chr6	146602276	146634592	-	3298	1	Tm7sf3
NM_026315	NM_026315	67687	chr8	79210430	79248583	-	970	1	1700011L22Rik
NR_027968	NR_027968	67692	chr10	21593145	21622375	+	1058	1	1700020N01Rik
NM_026334	NM_026334	67717	chr19	33961248	33976813	+	1341	1	Lipf
NM_001163386	NM_001163386	67741	chr3	138164135	138186713	-	1588	1	4930579F01Rik
NM_026367	NM_026367	67769	chr1	187215511	187351429	+	4537	1	Gpatch2
NM_023386	NM_023386	67775	chr16	23609919	23614222	+	1569	1	Rtp4
NM_026378	NM_026378	67789	chr9	108569892	108572771	+	1723	1	Dalrd3
NM_026389	NM_026389	67811	chr11	78512296	78522736	+	1938	1	Poldip2
NM_026402	NM_026402	67841	chr16	45158829	45188538	+	1999	1	Atg3
NM_026408	NM_026408	67847	chr18	52767811	52915931	+	3540	1	Sncaip
NR_040538	NR_040538	67850	chr3	58141707	58163807	-	1636	1	1700007F19Rik
NR_120500	NR_120500	67854	chr1	96906176	96997560	-	2460	1	Slco6b1
NM_001003951	NM_001003951	67935	chr8	93499213	93535707	-	1879	1	Ces5a
NM_026500	NM_026500	67997	chr1	136415271	136440220	+	2218	1	Ddx59
NM_026507	NM_026507	68014	chr9	64137144	64172931	-	2763	1	Zwilch
NR_027890	NR_027890	68144	chr2	6922702	6928722	-	6020	1	5031426D15Rik
NR_045799	NR_045799	68238	chr16	5975587	5998496	+	671	1	1700123O21Rik
NM_026634	NM_026634	68243	chr2	104122769	104124746	+	815	1	A930018P22Rik
NR_015532	NR_015532	68245	chr14	122229905	122233638	-	466	1	1700108J01Rik
NM_026648	NM_026648	68270	chr8	119575235	119598454	+	2807	1	Dnaaf1
NR_027970	NR_027970	68314	chr2	163493804	163541721	-	839	1	Hnf4aos
NM_026743	NM_026743	68498	chr6	127887622	127953031	+	4199	1	Tspan11
NM_026763	NM_026763	68553	chr9	105990318	106096691	-	7399	1	Col6a4
NM_026793	NM_026793	68632	chr10	5593728	5606791	+	2775	1	Myct1
NM_001081416	NM_001081416	68655	chr17	7738568	7804974	-	5825	1	Fndc1
NM_133187	NM_133187	68659	chr3	79885930	79946278	+	6621	1	Fam198b
NM_026826	NM_026826	68735	chr5	100798759	100804467	+	494	1	Mrps18c
NM_001033874	NM_001033874	68870	chr2	28700161	28813165	+	1555	1	Ak8
NM_026895	NM_026895	68972	chr1	191045830	191062932	-	1226	1	Tatdn3
NR_040439	NR_040439	69030	chr1	98131467	98144655	+	1684	1	1810006J02Rik
NR_045472	NR_045472	69054	chr12	49476993	49480862	-	705	1	1810007C17Rik
NM_026931	NM_026931	69068	chr8	24437616	24438946	-	1328	1	1810011O10Rik
NM_026955	NM_026955	69137	chr9	15239045	15259413	+	1982	1	Vstm5
NM_026956	NM_026956	69142	chr8	4102793	4105764	-	1099	1	Cd209f
NM_001081070	NM_001081070	69191	chr17	26195999	26199087	-	1708	1	Pdia2
NM_026993	NM_026993	69219	chr3	145758692	145894277	+	3739	1	Ddah1
NM_133711	NM_133711	69281	chr8	54600781	54610098	+	1049	1	Spata4
NM_027032	NM_027032	69310	chr17	10403012	10840191	-	1348	1	Pacrg
NM_027034	NM_027034	69314	chr4	92144318	92147221	-	1254	1	Izumo3
NM_027048	NM_027048	69347	chr3	6615413	6620443	-	782	1	1700008P02Rik
NR_105038	NR_105038	69357	chrX	93156154	93156871	+	573	2	BC061195
NM_027059	NM_027059	69371	chr6	146850110	146871404	+	1256	1	Smco2
NM_027070	NM_027070	69397	chr1	53158577	53187617	-	616	1	1700019A02Rik
NM_183281	NM_183281	69457	chr16	57036967	57071346	-	3058	1	Tmem45a2
NM_027128	NM_027128	69592	chr5	87885695	87892742	+	857	1	Odam
NM_181395	NM_181395	69675	chr12	29938036	30017658	+	6589	1	Pxdn
NM_027163	NM_027163	69677	chr2	24153172	24160103	+	783	1	Il1f8
NR_045428	NR_045428	69750	chr17	69275362	69277206	-	759	1	2410021H03Rik
NR_028123	NR_028123	69797	chr9	99470421	99474751	+	862	1	1600029I14Rik
NM_001190310	NM_001190310	69810	chr6	123049962	123071555	+	776	1	Clec4b1
NR_026688	NR_026688	69812	chr5	135012122	135013157	-	496	1	Abhd11os
NM_027221	NM_027221	69815	chr5	31251706	31253197	+	896	1	Krtcap3
NM_027244	NM_027244	69875	chr17	56717762	56724248	+	2655	1	Ndufa11
NM_027251	NM_027251	69894	chr10	62107656	62111013	-	1725	1	2010107G23Rik
NM_027318	NM_027318	70103	chr5	136982194	136987959	-	1109	1	Znhit1
NM_027342	NM_027342	70186	chr16	36043844	36071515	-	628	1	Fam162a
NM_027398	NM_027398	70357	chr11	33629341	33843585	-	2246	1	Kcnip1
NM_027399	NM_027399	70358	chr5	5736322	5749317	-	1209	1	Steap1
NM_177819	NM_177819	70363	chr15	71445678	71727838	-	4601	1	Fam135b
NM_178379	NM_178379	70383	chr11	63962627	64079472	-	2912	1	Cox10
NM_029763	NM_029763	70408	chr2	144527745	144541779	+	4149	1	Polr3f
NM_197996	NM_197996	70423	chr10	62185396	62231218	-	3595	1	Tspan15
NM_027426	NM_027426	70433	chr4	148098437	148130698	-	5191	1	Draxin
NM_027438	NM_027438	70481	chr12	84146131	84148489	-	2356	1	Pnma1
NM_001081242	NM_001081242	70549	chr9	67217085	67559703	-	12074	1	Tln2
NM_183289	NM_183289	70571	chr7	138208972	138397730	-	2555	1	Tcerg1l
NR_045500	NR_045500	70592	chr5	48395573	48414294	+	1731	1	5730480H06Rik
NM_027475	NM_027475	70601	chr14	20319859	20348121	-	3109	1	Ecd
NM_028450	NM_028450	70676	chr1	44551671	44796836	+	2963	1	Gulp1
NM_001109985	NM_001109985	70729	chr1	170317496	170589849	-	2961	1	Nos1ap
NR_045141	NR_045141	70753	chr6	77380257	77382475	-	2218	1	6330415B21Rik
NR_102341	NR_102341	70832	chr5	19202368	19226555	-	2152	1	4921504A21Rik
NM_027584	NM_027584	70866	chr1	98421124	98509380	+	2312	1	Slco6d1
NR_038000	NR_038000	70874	chr10	120765732	120778886	+	1573	1	4921513I03Rik
NR_045711	NR_045711	70886	chr15	18078137	18369627	-	2297	1	4921515E04Rik
NM_001113323	NM_001113323	70893	chr9	26817953	26860823	-	2443	1	Glb1l3
NM_027609	NM_027609	70935	chr5	17476122	17480936	+	1225	1	Speer4f1
NM_027614	NM_027614	70948	chr12	65225517	65228454	+	2224	1	Wdr20rt
NM_027616	NM_027616	70950	chr18	21810897	22171396	-	3310	1	Ccdc178
NR_045361	NR_045361	70960	chr18	83292792	83325884	-	518	1	4921531P14Rik
NR_040593	NR_040593	70970	chr3	55055242	55084002	+	965	1	4931419H13Rik
NR_038004	NR_038004	70971	chr13	47960330	48018608	-	2004	1	4931429P17Rik
NR_040561	NR_040561	70972	chr16	71131076	71139029	+	770	1	4931420L22Rik
NR_045505	NR_045505	71054	chr5	36873595	36876879	-	1488	1	Ppp2r2cos
NR_045158	NR_045158	71090	chr10	51756174	51757194	-	1020	1	4933411G06Rik
NM_001290390	NM_001290390	71096	chr1	8359739	9299877	-	7236	1	Sntg1
NM_001039095	NM_001039095	71103	chr2	25793967	25815836	-	1084	1	Glt6d1
NR_045842	NR_045842	71153	chr7	143322772	143330650	-	1523	1	4933417O13Rik
NR_045849	NR_045849	71186	chr8	123235091	123242359	+	1226	1	4933417D19Rik
NR_046208	NR_046208	71244	chr7	68417424	68426133	+	1530	1	4933436H12Rik
NR_045854	NR_045854	71249	chr8	9125412	9132288	-	1142	1	4933430N04Rik
NR_040719	NR_040719	71274	chr9	75410184	75415537	+	1149	1	4933433G15Rik
NR_029439	NR_029439	71307	chr13	31565492	31582513	-	708	1	1700018A04Rik
NM_199055	NM_199055	71367	chr18	15452175	15718046	-	1363	1	Chst9
NM_001081224	NM_001081224	71373	chr18	51117898	51304641	+	2220	1	Prr16
NM_001293806	NM_001293806	71382	chr5	3596066	3637230	+	4527	1	Pex1
NM_172409	NM_172409	71409	chr2	52857868	53134202	+	5822	1	Fmnl2
NM_027790	NM_027790	71412	chr14	55222007	55241440	+	1260	1	Dhrs2
NM_175167	NM_175167	71425	chr2	154257879	154271243	+	2021	1	Bpifb9a
NM_023608	NM_023608	71584	chrX	100729847	100738901	+	2579	1	Gdpd2
NM_027837	NM_027837	71597	chr8	74873174	74893506	+	1786	1	Isx
NM_175173	NM_175173	71682	chr17	14818672	14943124	-	2732	1	Wdr27
NM_001007569	NM_001007569	71691	chr7	16959795	16962320	+	1682	1	Pnmal1
NM_001163645	NM_001163645	71720	chr6	50293327	50456170	-	6755	1	Osbpl3
NM_133735	NM_133735	71799	chr5	145147378	145167104	-	3208	1	Ptcd1
NM_001081048	NM_001081048	71803	chr6	120773768	120793982	+	1355	1	Slc25a18
NM_027944	NM_027944	71831	chr8	75448694	75984507	+	2028	1	1700007B14Rik
NM_027945	NM_027945	71832	chr10	99757705	99759658	-	1951	1	Csl
NM_027951	NM_027951	71840	chr17	25471590	25476594	+	1524	1	Tekt4
NM_027963	NM_027963	71860	chr11	67924806	67965642	-	2185	1	Cfap52
NM_027974	NM_027974	71877	chr1	20951626	20990841	+	2195	1	Efhc1
NM_027982	NM_027982	71887	chr3	104781056	104786017	+	1708	1	Ppm1j
NM_001289831	NM_001289831	71950	chr6	122707489	122714633	+	1988	1	Nanog
NM_028029	NM_028029	71972	chr19	43846815	43940198	-	6095	1	Dnmbp
NM_028093	NM_028093	72090	chr2	25080323	25085719	+	2294	1	Entpd8
NR_029440	NR_029440	72093	chr8	70776862	70777606	+	744	1	2010320M18Rik
NM_023655	NM_023655	72169	chr9	43310763	43336125	+	2819	1	Trim29
NR_037964	NR_037964	72203	chr11	59197793	59202431	-	2902	1	2610507I01Rik
NR_033613	NR_033613	72224	chr9	40050558	40053025	+	2467	1	1700001J11Rik
NR_040720	NR_040720	72229	chr9	45318266	45322079	-	701	1	1700003G13Rik
NR_040594	NR_040594	72274	chr3	45416584	45439309	-	579	1	1700027H10Rik
NM_001033164	NM_001033164	72307	chr16	18836580	18840113	+	1227	1	2510002D24Rik
NM_028202	NM_028202	72330	chr9	121777607	121783819	+	2447	1	Klhl40
NM_001145676	NM_001145676	72371	chr13	77135536	77613679	+	4928	1	2210408I21Rik
NR_015556	NR_015556	72386	chr11	113043906	113201838	-	1845	1	2610035D17Rik
NM_028224	NM_028224	72393	chr15	99497005	99528165	-	4654	1	Faim2
NR_015560	NR_015560	72395	chr4	125887851	125922310	-	3537	1	2610028E06Rik
NM_001013024	NM_001013024	72607	chr3	32817626	32935257	+	4663	1	Usp13
NM_028315	NM_028315	72662	chr14	99076634	99099770	-	3699	1	Dis3
NR_036594	NR_036594	72677	chr13	83891208	83928710	+	1099	1	2810049E08Rik
NM_198412	NM_198412	72685	chr4	101496648	101642799	+	5105	1	Dnajc6
NM_176835	NM_176835	72778	chr15	99099484	99104707	+	1457	1	Dnajc22
NM_028351	NM_028351	72780	chr10	29453107	29535867	-	2389	1	Rspo3
NM_145820	NM_145820	72789	chr3	66053558	66296837	-	6415	1	Veph1
NM_029704	NM_029704	72795	chr11	62281473	62316441	+	3386	1	Ttc19
NM_028876	NM_028876	73130	chr5	108121647	108132591	-	3745	1	Tmed5
NM_130448	NM_130448	73173	chr3	49743296	49757316	-	5162	1	Pcdh18
NM_028472	NM_028472	73230	chr9	23223076	23485215	+	3789	1	Bmper
NM_028478	NM_028478	73246	chr5	90603076	90640527	-	1985	1	Rassf6
NM_030143	NM_030143	73284	chr3	137623672	137628332	+	2716	1	Ddit4l
NR_028081	NR_028081	73327	chr6	85446785	85451970	-	1101	1	Pradc1
NM_030689	NM_030689	73340	chr15	79786351	79804709	-	4942	1	Nptxr
NM_001081671	NM_001081671	73347	chrX	155124981	155147849	-	1051	1	Cldn34b2
NR_045919	NR_045919	73358	chr2	118304914	118308166	+	442	1	1700054M17Rik
NM_028514	NM_028514	73360	chrX	46329007	46330345	+	1336	1	Actrt1
NM_027022	NM_027022	73381	chr8	104281042	104293181	-	1077	1	Cmtm2a
NM_175198	NM_175198	73422	chr12	85086814	85106431	-	2675	1	Prox2
NR_045732	NR_045732	73425	chr6	143593353	143651288	-	640	1	1700060C16Rik
NR_038180	NR_038180	73438	chr2	9189515	9197484	+	879	1	1700061F12Rik
NR_045383	NR_045383	73452	chr5	91766242	91767300	-	489	1	1700063O14Rik
NR_040467	NR_040467	73454	chr1	95990659	96021758	-	353	1	1700063A18Rik
NM_028547	NM_028547	73470	chr11	91575286	91577555	-	2267	1	Kif2b
NR_040693	NR_040693	73477	chr5	119108236	119114543	+	1122	1	1700081H04Rik
NM_028550	NM_028550	73481	chr6	40920460	40940557	-	1638	1	1700074P13Rik
NM_028561	NM_028561	73526	chr5	27495809	27501392	-	1970	1	Speer4b
NR_040527	NR_040527	73531	chr6	118246695	118248454	-	784	1	1700069P05Rik
NR_040728	NR_040728	73558	chr9	40333472	40343337	+	705	1	1700110K17Rik
NR_045934	NR_045934	73584	chr13	70573241	70576104	+	679	1	1700100L14Rik
NR_038181	NR_038181	73609	chr8	68368459	68375710	+	640	1	1700125H03Rik
NR_045185	NR_045185	73624	chr4	10508031	10797802	-	563	1	1700123O12Rik
NM_023709	NM_023709	73647	chr8	124576111	124618731	+	2308	1	Capn9
NM_028598	NM_028598	73673	chr9	58652856	58741559	-	875	1	Rec114
NM_001018002	NM_001018002	73693	chr16	48283735	48294292	+	1370	1	Dppa4
NM_139218	NM_139218	73708	chr6	122626424	122630271	+	812	1	Dppa3
NM_028638	NM_028638	73748	chr9	115909455	116076176	+	3635	1	Gadl1
NR_045940	NR_045940	73796	chr7	69496094	69499689	+	997	1	4930402F11Rik
NM_028654	NM_028654	73808	chr7	133587024	133602115	-	909	1	Tex36
NR_045941	NR_045941	73815	chr12	71540607	71556133	+	764	1	4930404H11Rik
NR_045953	NR_045953	73877	chr14	103977628	104027142	-	3129	1	4930432J09Rik
NM_001285937	NM_001285937	73884	chr1	63200358	63314575	+	12640	1	Zdbf2
NR_045955	NR_045955	73921	chr11	88905928	88936061	+	806	1	Scpep1os
NR_045956	NR_045956	73922	chr11	90804691	90895152	+	646	1	4930405D11Rik
NR_040631	NR_040631	73938	chr2	117821928	117909136	+	1270	1	4930412B13Rik
NR_045960	NR_045960	73972	chr12	14996389	15050389	-	798	1	4930448C13Rik
NR_045060	NR_045060	73989	chr14	79702920	79712930	+	1076	1	4930452G13Rik
NR_045352	NR_045352	73990	chr10	21319088	21342055	-	1012	1	4930455C13Rik
NM_001017525	NM_001017525	74007	chr10	85598411	85660292	+	3918	1	Btbd11
NM_028719	NM_028719	74020	chr9	104569788	105034544	+	3636	1	Cpne4
NM_028725	NM_028725	74032	chr8	117661399	117671515	-	2830	1	Sdr42e1
NM_001159638	NM_001159638	74088	chr2	105224342	105379860	+	1508	1	Them7
NM_028748	NM_028748	74090	chr9	61953738	62026790	-	3490	1	Paqr5
NM_028757	NM_028757	74103	chr2	17346734	17731068	-	2971	1	Nebl
NM_001166391	NM_001166391	74145	chr13	36867178	37050244	-	3837	1	F13a1
NM_198003	NM_198003	74149	chr17	22424268	22456689	+	2908	1	Zfp946
NM_028810	NM_028810	74194	chr2	51130439	51149111	-	2820	1	Rnd3
NM_028813	NM_028813	74199	chr17	78508063	78627409	+	2704	1	Vit
NM_028842	NM_028842	74264	chrX	163760139	163761332	-	1191	1	Rnf138rt1
NR_045965	NR_045965	74280	chr13	70004050	70028348	-	1039	1	1700084F23Rik
NR_030733	NR_030733	74284	chr12	74284276	74295950	+	1041	1	1700086L19Rik
NM_028875	NM_028875	74335	chr12	111803192	111813879	-	2451	1	Xrcc3
NM_028880	NM_028880	74342	chr6	77242717	77245517	+	2517	1	Lrrtm1
NM_028901	NM_028901	74376	chr5	112688876	112896362	-	8234	1	Myo18b
NM_028902	NM_028902	74377	chr17	31944769	32034508	-	2857	1	Hsf2bp
NR_015540	NR_015540	74403	chr1	89676507	89683892	-	3607	1	4933400F21Rik
NM_028930	NM_028930	74424	chr7	118633736	118675085	+	2905	1	Tmc5
NM_028946	NM_028946	74446	chr3	135348037	135397827	+	2230	1	Slc9b1
NM_001029912	NM_001029912	74464	chr4	116877402	116989105	+	5381	1	Zswim5
NM_001270718	NM_001270718	74482	chr16	13981702	13986867	-	860	1	Ifitm7
NM_028986	NM_028986	74533	chr2	148681120	148692949	+	4127	1	Gzf1
NR_040732	NR_040732	74602	chr9	45416626	45431232	-	1254	1	4833428L15Rik
NR_033463	NR_033463	74622	chr17	79475624	79477885	-	1614	1	4930429F11Rik
NM_029025	NM_029025	74626	chr1	132506230	132508639	+	1738	1	Tmem81
NM_029036	NM_029036	74648	chr4	129150825	129189482	-	1537	1	S100pbp
NM_029042	NM_029042	74663	chr16	38812205	38828749	-	1362	1	4930435E12Rik
NR_046274	NR_046274	74667	chr14	71856709	71920438	+	1541	1	4930434J06Rik
NR_073360	NR_073360	74688	chr8	9144669	9149050	+	1436	1	4930453L07Rik
NM_001083618	NM_001083618	74711	chr2	152962485	153008482	+	2922	1	Ttll9
NR_040451	NR_040451	74726	chr15	46435866	46496179	-	1289	1	4930523O13Rik
NM_138303	NM_138303	74766	chr9	21588682	21592831	-	2167	1	Yipf2
NR_040475	NR_040475	74897	chr1	41167560	41181252	-	570	1	4930448I06Rik
NM_029122	NM_029122	74918	chr1	90042132	90153401	-	3189	1	Iqca
NR_040477	NR_040477	74942	chr1	194212187	194222759	-	575	1	4930503O07Rik
NR_040627	NR_040627	74971	chr1	184712497	184718989	+	1719	1	4930488B22Rik
NM_001163559	NM_001163559	74978	chr10	103063198	103236322	-	5204	1	Lrriq1
NM_183109	NM_183109	75002	chr15	100280837	100293053	+	1342	1	Tmprss12
NM_029154	NM_029154	75010	chr5	3657004	3679544	+	1433	1	Tmbim7
NM_001100394	NM_001100394	75087	chr11	30426006	30471829	-	918	1	4930505A04Rik
NM_175217	NM_175217	75104	chr5	142563481	142608752	-	2137	1	Mmd2
NR_040654	NR_040654	75128	chr4	140872693	140878057	+	590	1	4930515B02Rik
NM_029182	NM_029182	75141	chr8	75213944	75224113	+	2805	1	Rasd2
NR_045374	NR_045374	75162	chr18	17568746	17580990	-	859	1	4930545E07Rik
NM_029199	NM_029199	75185	chrX	154482002	154484682	+	958	1	Samt4
NM_029210	NM_029210	75209	chr13	95959443	96132577	-	4237	1	Sv2c
NR_045978	NR_045978	75239	chr7	113100236	113142015	-	1421	1	4930543E12Rik
NM_029230	NM_029230	75272	chr14	75642259	75667137	+	862	1	Erich6b
NM_029247	NM_029247	75311	chr9	53405286	53432803	+	1226	1	4930550C14Rik
NM_029252	NM_029252	75328	chr16	92318763	92321441	-	2676	1	4930563D23Rik
NR_040656	NR_040656	75360	chr4	26635820	26705449	-	558	1	4930548K13Rik
NR_040661	NR_040661	75367	chr4	52814604	52828269	+	1184	1	4930552N02Rik
NR_040704	NR_040704	75369	chr5	131880269	131883768	+	512	1	4930563F08Rik
NM_001113367	NM_001113367	75388	chr1	55300069	55362707	-	1075	1	Boll
NM_029269	NM_029269	75396	chr1	88407010	88426438	+	869	1	Spp2
NR_073044	NR_073044	75443	chrX	102908905	102909651	+	417	1	1700011M02Rik
NM_001081095	NM_001081095	75471	chr4	39450293	39451778	+	1258	1	1700009N14Rik
NM_029315	NM_029315	75507	chr13	78024902	78026296	+	1392	1	Pou5f2
NR_040326	NR_040326	75508	chr2	168978269	168978906	+	470	1	1700017J07Rik
NM_028169	NM_028169	75538	chr7	44496588	44501134	+	842	1	Fam71e1
NM_198414	NM_198414	75552	chr9	95559817	95562121	+	2302	1	Paqr9
NR_040741	NR_040741	75567	chr9	36668856	36693189	-	692	1	1700027I24Rik
NM_029346	NM_029346	75577	chr18	70240429	70244584	-	1222	1	Dynap
NM_001127346	NM_001127346	75597	chr13	108052589	108158625	-	674	1	Ndufaf2
NR_040509	NR_040509	75655	chr2	171956879	171962799	-	850	1	1700028P15Rik
NM_023790	NM_023790	75659	chr6	83152710	83156379	-	1255	1	Wdr54
NM_029385	NM_029385	75686	chr9	105129338	105131805	-	1601	1	Nudt16
NM_080846	NM_080846	75689	chr11	102836296	102838039	+	729	1	Higd1b
NM_029401	NM_029401	75718	chr4	138568969	138623992	-	3833	1	Vwa5b1
NM_029407	NM_029407	75729	chr15	79609576	79658956	-	5167	1	Fam227a
NR_073013	NR_073013	75783	chr5	44966201	44978805	+	2252	1	4930431F12Rik
NR_026888	NR_026888	75809	chr8	93811694	93813555	-	1861	1	4930488L21Rik
NR_029444	NR_029444	75881	chr9	98562460	98563611	-	1151	1	4930579K19Rik
NR_045371	NR_045371	75916	chr5	127170565	127184356	+	926	1	4930572K03Rik
NM_029498	NM_029498	76007	chr14	56887795	56962579	+	6850	1	Zmym2
NM_183116	NM_183116	76306	chr10	23796986	23827968	+	2821	1	Slc18b1
NM_023814	NM_023814	76365	chr9	87702800	87731260	-	4669	1	Tbx18
NM_001110240	NM_001110240	76376	chr4	86983126	87227963	-	10490	1	Slc24a2
NM_029586	NM_029586	76380	chr11	108682618	108860615	+	932	1	Cep112
NM_029608	NM_029608	76426	chr2	172472554	172474316	+	645	1	Fam209
NM_029614	NM_029614	76453	chr7	89507785	89517586	-	3222	1	Prss23
NM_029654	NM_029654	76559	chr12	105613540	105685241	-	10128	1	Atg2b
NM_054043	NM_054043	76626	chr11	88339382	88718229	-	6474	1	Msi2
NM_029690	NM_029690	76652	chr3	30597073	30599870	-	1888	1	Actrt3
NR_033618	NR_033618	76669	chr9	8221889	8241987	+	1107	1	1700128F08Rik
NM_029714	NM_029714	76718	chr7	29697219	29727015	-	3926	1	Catsperg2
NM_198415	NM_198415	76722	chr13	91853387	91876885	-	1474	1	Ckmt2
NM_175245	NM_175245	76789	chr14	99034544	99046136	-	2251	1	Mzt1
NM_183119	NM_183119	76803	chr13	66418114	66441118	-	508	1	2410141K09Rik
NM_001163686	NM_001163686	76829	chr2	170731807	170879775	+	1758	1	Dok5
NM_029766	NM_029766	76843	chr1	191537356	191575544	-	4204	1	Dtl
NM_001039593	NM_001039593	76925	chr1	170308861	170312125	+	709	1	1700015E13Rik
NM_001001326	NM_001001326	76954	chr7	109523911	109617147	-	4233	1	St5
NM_199065	NM_199065	76965	chr14	108909989	108914239	-	4248	1	Slitrk1
NM_029837	NM_029837	77015	chr2	106695601	106868360	+	2366	1	Mpped2
NM_029838	NM_029838	77018	chr3	130180845	130599883	+	7381	1	Col25a1
NR_040744	NR_040744	77119	chr9	34042371	34059019	+	1079	1	7630403G23Rik
NR_040664	NR_040664	77173	chr4	108942843	108972077	-	897	1	8030443G20Rik
NR_040483	NR_040483	77341	chr1	61378432	61395904	+	887	1	9530026F06Rik
NM_023865	NM_023865	77432	chr4	122689259	122705135	+	818	1	9530002B09Rik
NR_040338	NR_040338	77433	chr18	54422295	54453294	+	2225	1	Redrum
NM_029920	NM_029920	77521	chr5	147957320	148316065	+	7526	1	Mtus2
NM_001001980	NM_001001980	77569	chr5	66745840	67057159	+	6114	1	Limch1
NM_172430	NM_172430	77629	chr1	83255781	83408200	-	6499	1	Sphkap
NM_029947	NM_029947	77630	chr5	98180869	98187448	+	3113	1	Prdm8
NM_153409	NM_153409	77771	chr2	65845767	66031546	+	10663	1	Csrnp3
NR_040746	NR_040746	78025	chr9	15619857	15641220	+	428	1	4930540M03Rik
NR_040620	NR_040620	78049	chr2	52291002	52315240	+	403	1	4930573O16Rik
NM_030033	NM_030033	78081	chr1	18115191	18137051	-	1183	1	Crisp4
NR_108098	NR_108098	78158	chr2	78051177	78194430	+	1031	1	4930440I19Rik
NR_038024	NR_038024	78170	chr10	86095854	86113585	+	560	1	4930486F22Rik
NR_046192	NR_046192	78176	chr14	64099295	64104235	-	861	1	4930471C04Rik
NM_001289499	NM_001289499	78249	chr17	42656887	42692284	-	2978	1	Adgrf4
NM_030084	NM_030084	78308	chr17	57234915	57247689	-	2123	1	Gpr108
NR_046194	NR_046194	78420	chr11	85766833	85775680	-	655	1	Bcas3os2
NM_030101	NM_030101	78444	chr7	68236608	68264233	-	949	1	Pgpep1l
NM_030110	NM_030110	78506	chr8	40308051	40386304	+	3252	1	Micu3
NM_024279	NM_024279	78634	chr8	12573049	12600738	+	752	1	Spaca7
NR_040385	NR_040385	78706	chr3	41487681	41493199	-	2166	1	Platr4
NM_175279	NM_175279	78748	chr7	112953962	112957458	+	3494	1	Rassf10
NM_023903	NM_023903	78753	chr19	34100943	34122687	+	2689	1	Lipm
NM_030166	NM_030166	78754	chr14	32029103	32058326	+	2329	1	Galnt15
NR_040761	NR_040761	78773	chr6	94943834	94951545	+	2224	1	4930511E03Rik
NM_030179	NM_030179	78785	chr17	71781947	71858351	+	4037	1	Clip4
NM_172437	NM_172437	78895	chr15	94522640	94543507	-	2837	1	Pus7l
NM_001081328	NM_001081328	78923	chr18	59175340	59411336	+	3877	1	Chsy3
NR_038051	NR_038051	78931	chr18	68889487	68951528	-	2315	1	4930546C10Rik
NM_030231	NM_030231	78933	chr4	110397698	111657519	+	1885	1	Agbl4
NM_001199242	NM_001199242	80334	chr5	48389503	48509761	-	2090	1	Kcnip4
NM_030610	NM_030610	80857	chr8	40279166	40286953	-	1471	1	Fgf20
NM_030699	NM_030699	80883	chr3	109780050	110143472	-	5337	1	Ntng1
NM_030708	NM_030708	80892	chr3	5218554	5415855	+	13861	1	Zfhx4
NM_001204134	NM_001204134	81799	chr15	10952357	10980162	+	2536	1	C1qtnf3
NM_133189	NM_133189	81904	chr7	3336585	3366948	+	822	1	Cacng7
NM_031880	NM_031880	83813	chr11	69850563	69858730	-	3204	1	Tnk1
NM_023277	NM_023277	83964	chr9	27097384	27155421	-	1959	1	Jam3
NM_032400	NM_032400	84112	chr3	60081869	60087566	+	1567	1	Sucnr1
NM_053107	NM_053107	93690	chr1	42952872	43035449	+	3856	1	Gpr45
NM_053112	NM_053112	93725	chr14	43922898	43923368	-	469	1	Ear10
NM_001013581	NM_001013581	93742	chr8	127299612	127433144	+	3183	1	Pard3
NM_053133	NM_053133	93879	chr18	37355271	37357610	+	2338	1	Pcdhb8
NM_033321	NM_033321	94045	chr11	73160530	73172687	+	2273	1	P2rx5
NM_053171	NM_053171	94109	chr8	15892545	17535385	-	14206	1	Csmd1
NM_033373	NM_033373	94179	chr11	99477973	99493110	-	1529	1	Krt23
NM_001289530	NM_001289530	94191	chr13	8202866	8760442	+	5616	1	Adarb2
NM_053011	NM_053011	94217	chr2	40596773	42653598	-	14650	1	Lrp1b
NM_053188	NM_053188	94224	chr17	74017706	74047916	-	847	1	Srd5a2
NM_144796	NM_144796	96935	chr1	182764906	182895654	+	2025	1	Susd4
NM_028889	NM_028889	98363	chr1	87264364	87310791	+	1799	1	Efhd1
NM_145142	NM_145142	98388	chr1	38863873	38898160	-	3110	1	Chst10
NM_133816	NM_133816	98402	chr1	89070462	89153793	+	3665	1	Sh3bp4
NM_001098528	NM_001098528	98741	chr1	15312452	15714214	+	5305	1	Kcnb2
NM_001290819	NM_001290819	99334	chr2	121158273	121171125	-	5922	1	Zscan29
NR_040387	NR_040387	99686	chr3	154330821	154334687	+	2161	1	AI606473
NM_133869	NM_133869	99712	chr3	106502260	106547802	-	2803	1	Cept1
NM_133893	NM_133893	100535	chr5	120914818	120921647	+	1726	1	Oas1d
NM_153598	NM_153598	100727	chr5	86889770	86906937	-	3040	1	Ugt2b34
NM_133350	NM_133350	100732	chr5	30814641	30866106	+	2012	1	Mapre3
NM_145580	NM_145580	101883	chr7	30565427	30567962	+	1179	1	Igflr1
NM_170684	NM_170684	102278	chr8	123117374	123135185	+	2388	1	Cpne7
NR_027907	NR_027907	102623	chr9	27352685	27357543	+	4858	1	AI414108
NR_040760	NR_040760	102688	chr9	113496746	113587152	-	2174	1	AU023762
NM_145629	NM_145629	102866	chrX	75785654	75874574	-	3233	1	Pls3
NM_001252330	NM_001252330	103098	chr10	103367808	103419379	+	3533	1	Slc6a15
NM_175333	NM_175333	103775	chr17	57032772	57041654	-	1217	1	Slc25a41
NM_175640	NM_175640	103968	chr7	79721164	79732776	-	1905	1	Plin1
NM_001007596	NM_001007596	104001	chr12	72211749	72236727	-	1542	1	Rtn1
NM_023268	NM_023268	104009	chr1	155778155	155812899	-	2480	1	Qsox1
NM_033610	NM_033610	104069	chr13	54758860	54766440	-	1188	1	Sncb
NR_027773	NR_027773	104103	chr17	12741311	12859884	+	601	1	Airn
NM_001005477	NM_001005477	104382	chr5	106452523	106458166	-	2309	1	Barhl2
NM_029007	NM_029007	105005	chr12	14147598	14152038	-	3376	1	Fam84a
NM_001164743	NM_001164743	105355	chr13	23839434	23860714	+	4138	1	Slc17a3
NM_153518	NM_153518	105833	chr15	98708227	98723333	+	1867	1	Ccdc65
NM_130859	NM_130859	105844	chr15	78775136	78803042	-	4705	1	Card10
NM_025340	NM_025340	106025	chr15	76347040	76351110	-	1722	1	Sharpin
NM_026494	NM_026494	106564	chr4	119418533	119422420	-	1435	1	Ppcs
NM_001242389	NM_001242389	106628	chr17	57249451	57263697	+	2441	1	Trip10
NM_001163764	NM_001163764	106795	chr17	35512735	35516824	-	1610	1	Tcf19
NM_146079	NM_146079	107477	chr17	47385393	47392967	+	1662	1	Guca1b
NM_172671	NM_172671	107515	chr2	109917647	110014257	+	5040	1	Lgr4
NM_026924	NM_026924	107586	chr2	144305176	144332080	-	1466	1	Ovol2
NM_027098	NM_027098	107734	chr1	37890553	37898333	+	683	1	Mrpl30
NM_174991	NM_174991	107831	chr15	74516196	74589464	+	6194	1	Adgrb1
NM_001173372	NM_001173372	108017	chr6	117933559	117937335	-	540	1	Fxyd4
NM_181850	NM_181850	108069	chr5	9485236	9725352	-	3528	1	Grm3
NM_023908	NM_023908	108116	chr7	74281916	74554780	-	4685	1	Slco3a1
NM_181405	NM_181405	108657	chr1	92910825	92920585	+	3026	1	Rnpepl1
NM_175358	NM_175358	108672	chrX	104536970	104671064	-	5494	1	Zdhhc15
NM_001113246	NM_001113246	108699	chr2	73610660	73775346	-	4035	1	Chn1
NM_175369	NM_175369	108811	chr14	77036772	77112263	+	1772	1	Ccdc122
NM_028444	NM_028444	109042	chr7	105480616	105482197	-	1022	1	Prkcdbp
NM_175413	NM_175413	109245	chr3	116562973	116583134	+	3081	1	Lrrc39
NM_001033636	NM_001033636	109294	chr1	11263963	11303682	+	6529	1	Prex2
NM_175425	NM_175425	109323	chr5	43601922	43616586	+	1269	1	C1qtnf7
NR_030675	NR_030675	109361	chr15	79889532	79893138	-	3606	1	D730005E14Rik
NM_023456	NM_023456	109648	chr6	49822710	49829505	+	558	1	Npy
NM_025973	NM_025973	109820	chr17	47726842	47734478	+	1373	1	Pgc
NM_001042711	NM_001042711	109959	chr3	113249178	113258699	-	1565	4	Amy2a5
NR_028262	NR_028262	110333	chr10	92081746	92165178	-	2674	1	Rmst
NM_029851	NM_029851	110350	chr9	6928503	7177046	-	13881	1	Dync2h1
NM_152923	NM_152923	110862	chr15	65994915	66286224	-	2862	1	Kcnq3
NM_134157	NM_134157	110935	chr6	83743017	83758810	+	1911	1	Atp6v1b1
NM_053204	NM_053204	111173	chr6	119570796	119848150	-	8737	1	Erc1
NM_053242	NM_053242	114142	chr6	14901349	15441977	+	6739	1	Foxp2
NM_033522	NM_033522	114712	chr12	33928425	33929309	+	882	1	Ferd3l
NR_036631	NR_036631	116811	chr7	6955686	6976662	-	3217	1	Zim3
NM_053270	NM_053270	116837	chr1	22288422	22432843	-	2171	1	Rims1
NM_001081067	NM_001081067	117586	chr15	60917589	60921270	-	1814	1	A1bg
NM_001242411	NM_001242411	117600	chr10	121780991	122047315	-	7694	1	Srgap1
NM_080462	NM_080462	140483	chr2	24002913	24049379	-	1629	1	Hnmt
NM_181045	NM_181045	140904	chr5	130369458	130840645	+	2260	1	Caln1
NM_080852	NM_080852	140918	chr3	14480699	14505818	+	1721	1	Slc7a12
NM_001170748	NM_001170748	142687	chr14	26894604	26915257	+	2003	1	Asb14
NM_130457	NM_130457	170571	chr8	112570043	112882707	+	4824	1	Cntnap4
NM_130880	NM_130880	170711	chr7	63444772	63759027	+	3445	1	Otud7a
NM_130893	NM_130893	170729	chr15	76516203	76522129	-	4006	1	Scrt1
NM_001081346	NM_001081346	170799	chr10	67979598	68043864	+	3917	1	Rtkn2
NM_133364	NM_133364	170952	chr12	103196908	103242146	-	898	1	Prima1
NM_134170	NM_134170	171188	chr6	66552183	66559708	-	2437	1	Vmn1r32
NM_134176	NM_134176	171194	chr6	56956513	56957406	+	892	1	Vmn1r4
NM_134197	NM_134197	171231	chr17	20846551	20847501	+	949	1	Vmn1r230
NM_134199	NM_134199	171233	chr17	21260427	21262863	+	1777	1	Vmn1r235
NM_134209	NM_134209	171243	chr7	12321208	12322128	-	919	1	Vmn1r83
NM_134227	NM_134227	171261	chr7	13131471	13132358	-	886	1	Vmn1r87
NM_134230	NM_134230	171264	chr7	10273828	10275351	-	1521	1	Vmn1r66
NM_134253	NM_134253	171388	chr3	95241293	95251193	-	1776	1	Bnipl
NM_138666	NM_138666	192167	chr3	25431841	26331909	-	5620	1	Nlgn1
NM_138674	NM_138674	192190	chr15	44457553	44597135	+	12661	1	Pkhd1l1
NM_138948	NM_138948	192650	chr11	4738821	4746778	-	692	1	Cabp7
NR_003364	NR_003364	193217	chr11	116752167	116757883	+	3259	1	BC018473
NM_001033233	NM_001033233	194597	chr5	86410410	86468990	-	2646	1	Tmprss11a
NM_145890	NM_145890	195733	chr12	24580719	24617391	+	3084	1	Grhl1
NR_027989	NR_027989	207157	chr6	101774249	101801982	+	1554	1	Gm9871
NM_001114611	NM_001114611	207227	chr16	37107310	37384958	-	11790	1	Stxbp5l
NM_170599	NM_170599	207683	chr16	38902345	39027157	+	3403	1	Igsf11
NR_015565	NR_015565	208079	chr6	60279043	60403707	-	1446	1	A530053G22Rik
NM_177330	NM_177330	208188	chr3	27371351	27378010	+	4428	1	Ghsr
NM_139152	NM_139152	208372	chr1	89952678	90014577	-	1397	1	Asb18
NM_001177631	NM_001177631	208618	chr2	20519513	20810535	+	7384	1	Etl4
NM_145939	NM_145939	208624	chr16	20605458	20610749	-	1414	1	Alg3
NM_153509	NM_153509	209743	chr9	89590035	89622986	-	4238	1	AF529169
NM_172476	NM_172476	209760	chr7	118535844	118584686	-	4475	1	Tmc7
NM_001024138	NM_001024138	209776	chr7	119144323	119184374	-	1035	1	Gpr139
NM_175434	NM_175434	210027	chr8	126298579	126395977	+	2774	1	Slc35f3
NM_001081370	NM_001081370	210274	chr7	144284385	144422675	+	5900	1	Shank2
NM_001193274	NM_001193274	210321	chr7	81494274	81498330	-	683	1	BC048679
NM_173379	NM_173379	210530	chr16	25960323	26105784	-	2231	1	P3h2
NM_001033764	NM_001033764	210940	chr1	26681801	26687460	-	4327	1	4931408C20Rik
NM_001104626	NM_001104626	211223	chr5	109286269	109297556	-	2561	1	Vmn2r15
NM_178591	NM_178591	211323	chr8	31818028	31918203	-	2093	1	Nrg1
NM_203490	NM_203490	211578	chr7	145314835	145324059	+	3113	1	Mrgprd
NM_145967	NM_145967	211739	chr11	16257724	16284551	+	3622	1	Vstm2a
NM_172499	NM_172499	211798	chr1	40772040	40790657	-	3144	1	Mfsd9
NM_178670	NM_178670	212163	chr18	77633281	77714010	-	3411	1	8030462N17Rik
NM_183147	NM_183147	212518	chr7	140150628	140154659	-	3152	1	Sprn
NM_001162957	NM_001162957	212892	chr10	33905111	33916021	+	3642	1	Rsph4a
NM_145218	NM_145218	212996	chr5	130874951	131307522	-	4183	1	Wbscr17
NM_153785	NM_153785	213084	chr11	52004221	52038165	+	2750	1	Cdkl3
NM_178673	NM_178673	213262	chr3	76074561	76710005	+	4784	1	Fstl5
NM_001297612	NM_001297612	213435	chr8	85324929	85381041	-	2602	1	Mylk3
NM_145394	NM_145394	213603	chr3	121459528	121532344	-	2543	1	Slc44a3
NM_001037865	NM_001037865	213945	chr6	7997808	8192617	-	4193	1	Col28a1
NM_145136	NM_145136	214384	chr11	65176571	65269989	-	5101	1	Myocd
NM_173185	NM_173185	214897	chr9	65909010	66045014	+	7167	1	Csnk1g1
NM_178675	NM_178675	215085	chr10	52690501	53111622	+	4963	1	Slc35f1
NM_001007573	NM_001007573	215090	chr4	124855239	124862171	-	2721	1	Maneal
NM_001243258	NM_001243258	215467	chr9	46998741	47003860	+	1016	1	Gm4791
NM_001002268	NM_001002268	215798	chr10	14402585	14545036	-	6478	1	Adgrg6
NM_145419	NM_145419	216019	chr10	62383137	62422457	-	3463	1	Hkdc1
NM_001033261	NM_001033261	216345	chr10	115384959	115432771	+	6919	1	Zfc3h1
NM_001166661	NM_001166661	216613	chr11	28385684	28584324	-	5334	1	Ccdc85a
NM_153079	NM_153079	216749	chr11	56024990	56040987	-	3270	1	Nmur2
NM_001099288	NM_001099288	216831	chr11	65002039	65162961	-	4000	1	Arhgap44
NM_173754	NM_173754	216835	chr11	67854523	67922153	-	4445	1	Usp43
NM_001105561	NM_001105561	217122	chr11	94755136	94761182	-	2686	1	Gm11545
NM_178681	NM_178681	217480	chr12	37880705	38633410	+	5517	1	Dgkb
NM_177624	NM_177624	218739	chr14	13670876	13683148	+	1234	1	Sntn
NM_177629	NM_177629	219170	chr14	78081024	78089007	-	2232	1	Fam216b
NM_144845	NM_144845	223337	chr15	9335598	9370870	+	2187	1	Ugt3a2
NM_172610	NM_172610	223726	chr15	83780023	83858474	+	3246	1	Mpped1
NM_001008230	NM_001008230	224055	chr16	23925548	23930794	-	2424	1	Rtp2
NM_001104550	NM_001104550	224552	chr17	19053493	19081311	+	2567	1	Vmn2r98
NM_001104591	NM_001104591	224916	chr17	57508783	57545314	-	2563	1	Vmn2r120
NM_001128180	NM_001128180	224997	chr17	70522110	70821413	+	5294	1	Dlgap1
NM_153086	NM_153086	225152	chr18	9278607	9282809	-	2657	1	Gjd4
NM_172632	NM_172632	225724	chr18	73928486	74064949	-	4606	1	Mapk4
NM_001164504	NM_001164504	225743	chr18	77456110	77565136	-	7290	1	Rnf165
NM_001039149	NM_001039149	225825	chr18	89197427	89270327	+	2140	1	Cd226
NM_139301	NM_139301	225865	chr19	5335741	5344153	+	2048	1	Catsper1
NM_145496	NM_145496	225913	chr19	10592197	10604258	-	2237	1	Tkfc
NM_145831	NM_145831	226049	chr19	25672411	25678991	+	2331	1	Dmrt2
NM_001081319	NM_001081319	226089	chr19	29522282	29605921	+	6254	1	Ric1
NM_198108	NM_198108	226123	chr19	42074939	42086370	-	1809	1	Morn4
NM_172641	NM_172641	226245	chr19	56461637	56486729	+	2370	1	Plekhs1
NM_001115074	NM_001115074	226356	chr1	119923519	119995210	-	2487	1	Cfap221
NM_001114663	NM_001114663	227120	chr1	55405946	55754285	+	6547	1	Plcl1
NM_001081386	NM_001081386	227485	chr1	110889195	110977372	-	3040	1	Cdh19
NM_177647	NM_177647	227526	chr2	3513065	3526376	+	3007	1	Cdnf
NM_145523	NM_145523	227960	chr2	62664327	62694109	+	3278	1	Gca
NM_145534	NM_145534	228662	chr2	138278493	138287422	+	4934	1	Btbd3
NM_023504	NM_023504	228731	chr2	147083876	147085345	-	1062	1	Nkx2-4
NM_001080816	NM_001080816	229687	chr3	106016919	106032895	-	1577	1	Chil5
NM_172685	NM_172685	229731	chr3	109123149	109168409	+	3371	1	Slc25a24
NM_178697	NM_178697	229933	chr3	145070265	145099041	-	3905	1	Clca2
NM_153521	NM_153521	230654	chr4	116075269	116097109	+	3119	1	Lrrc41
NM_001243306	NM_001243306	230822	chr4	135369577	135398227	-	1997	1	Ncmap
NM_198610	NM_198610	230868	chr4	140026852	140246811	-	1988	1	Igsf21
NM_001099299	NM_001099299	230959	chr4	153373221	153482830	-	3059	1	Ajap1
NM_001081383	NM_001081383	231051	chr5	25271794	25498783	-	16759	1	Kmt2c
NM_181323	NM_181323	231293	chr5	73406078	73453425	+	2695	1	Cwh43
NM_153568	NM_153568	231296	chr5	73606642	73632421	-	3086	1	Lrrc66
NM_001104642	NM_001104642	232367	chr6	124191596	124231784	-	2567	1	Vmn2r27
NM_027784	NM_027784	232426	chr6	133292216	133295790	+	642	1	5530400C23Rik
NM_178028	NM_178028	232836	chr7	6197090	6216137	+	642	1	Galp
NM_170760	NM_170760	233073	chr7	30563340	30565364	+	854	1	U2af1l4
NM_177446	NM_177446	233090	chr7	33737193	33739295	-	498	1	Scgb2b24
NM_001100464	NM_001100464	233099	chr7	34011919	34013942	-	575	1	Scgb2b27
NM_177694	NM_177694	233246	chr7	51511029	51598707	+	7759	1	Ano5
NM_178705	NM_178705	233271	chr7	54835245	55268888	+	5260	1	Luzp2
NM_201639	NM_201639	233335	chr7	67730161	67759742	-	7860	1	Synm
NM_177696	NM_177696	233537	chr7	97919958	98049663	+	3030	1	Gdpd4
NM_206897	NM_206897	233670	chr7	106955984	106956934	-	949	1	Olfr6
NM_001278943	NM_001278943	233810	chr7	120409647	120544813	+	4588	1	Abca16
NM_172281	NM_172281	233900	chr7	127588698	127603605	+	4132	1	Rnf40
NM_199257	NM_199257	234129	chr8	22283441	22371418	+	2519	1	Tpte
NM_173789	NM_173789	234219	chr8	46292048	46294671	-	1526	1	Helt
NM_173411	NM_173411	234290	chr8	58911755	58914298	+	1600	1	BC030500
NM_175480	NM_175480	234725	chr8	110079734	110092752	+	4895	1	Zfp612
NM_001163762	NM_001163762	234797	chr8	120114152	120154574	+	1752	1	6430548M08Rik
NM_001024139	NM_001024139	235130	chr9	30899155	30922452	-	5918	1	Adamts15
NM_177701	NM_177701	235327	chr9	49250531	49280594	+	2288	1	Gm4894
NM_175484	NM_175484	235431	chr9	62419492	62537044	-	3596	1	Coro2b
NM_153098	NM_153098	235505	chr9	78615546	78716260	+	5832	1	Cd109
NM_177352	NM_177352	235533	chr9	96119429	96182953	+	2727	1	Gk5
NM_145621	NM_145621	235604	chr9	107935920	107949691	+	3018	1	Camkv
NM_001195437	NM_001195437	235634	chr9	110914739	110916861	-	494	1	Gm590
NM_001005569	NM_001005569	236509	chr2	37219491	37220420	+	928	1	Olfr366
NM_172788	NM_172788	237353	chr10	58813359	59138916	+	5769	1	Sh3rf3
NM_198614	NM_198614	237397	chr10	79606854	79614018	-	6743	1	C2cd4c
NM_172793	NM_172793	237754	chr11	49168325	49187089	-	2451	1	Btnl9
NM_178715	NM_178715	238257	chr12	73543114	73546395	-	3279	1	Tmem30b
NM_146244	NM_146244	238323	chr12	85135596	85151264	-	2521	1	Rps6kl1
NM_001080943	NM_001080943	238331	chr12	86983381	86988676	-	789	1	Zdhhc22
NM_001166030	NM_001166030	238564	chr13	32700827	32781779	-	5627	1	Mylk4
NM_175495	NM_175495	238725	chr13	76054851	76056996	-	2143	1	Gpr150
NM_175497	NM_175497	238880	chr13	111255013	111257749	+	2734	1	Actbl2
NM_177715	NM_177715	239217	chr14	102976581	102982637	-	6054	1	Kctd12
NM_001001490	NM_001001490	239283	chr14	120019585	120042435	-	3726	1	Oxgr1
NM_177355	NM_177355	239318	chr15	4375491	4575579	+	1885	1	Plcxd3
NM_001085421	NM_001085421	239364	chr15	33683875	33687883	-	4006	1	Tspyl5
NM_172815	NM_172815	239405	chr15	43020795	43170818	-	3332	1	Rspo2
NM_001081391	NM_001081391	239420	chr15	47580638	48791989	-	12949	1	Csmd3
NM_001164594	NM_001164594	239618	chr15	92597109	92771819	+	3383	1	Pdzrn4
NM_001033220	NM_001033220	239691	chr16	5211819	5222299	-	1362	1	AU021092
NM_001083894	NM_001083894	239759	chr16	21953818	21995542	-	3789	1	Liph
NM_172826	NM_172826	240025	chr17	14195230	14203831	-	2803	1	Dact2
NM_001033339	NM_001033339	240047	chr17	23629458	23645269	-	3361	1	Mmp25
NM_177719	NM_177719	240069	chr17	33135590	33139683	-	3706	1	Morc2b
NM_172829	NM_172829	240119	chr17	55445717	55499226	+	2271	1	St6gal2
NM_001033340	NM_001033340	240131	chr17	67630965	67632723	-	1756	1	Lrrc30
NM_001160268	NM_001160268	240753	chr1	133246097	133303435	+	7060	1	Plekha6
NM_173771	NM_173771	240755	chr1	134385940	134390983	+	1764	1	4933406M09Rik
NM_207583	NM_207583	240843	chr1	158245269	158356260	-	4091	1	Brinp2
NR_002858	NR_002858	241041	chr1	21285246	21298312	-	1142	1	Gm4956
NR_033627	NR_033627	241051	chr1	34633535	34636210	-	2675	1	AA619741
NM_139150	NM_139150	241066	chr1	60098247	60153953	+	5539	1	Carf
NM_001081658	NM_001081658	241073	chr1	63622851	63686927	-	2410	1	Dytn
NM_172854	NM_172854	241327	chr2	38931980	38960585	+	2399	1	Olfml2a
NM_178723	NM_178723	241494	chr2	77410627	77816816	-	3195	1	Zfp385b
NM_001033346	NM_001033346	241528	chr2	85188071	85196699	-	2895	1	Lrrc55
NM_183180	NM_183180	241556	chr2	93201760	93334487	-	3739	1	Tspan18
NM_001290784	NM_001290784	241576	chr2	101950201	102186460	-	3899	1	Ldlrad3
NM_172857	NM_172857	241624	chr2	119519404	119547627	-	3128	1	Exd1
NM_207247	NM_207247	242100	chr3	92014583	92031584	+	1100	1	Pglyrp3
NM_178594	NM_178594	242122	chr3	100825459	100896922	+	2614	1	Vtcn1
NM_001081263	NM_001081263	242259	chr3	153973436	154271720	+	4072	1	Slc44a5
NM_013526	NM_013526	242316	chr4	9844372	9862345	+	3528	1	Gdf6
NM_001166000	NM_001166000	242384	chr4	35706648	36718963	-	4089	1	Lingo2
NM_146254	NM_146254	242584	chr4	103038065	103114299	-	3774	1	Wdr78
NM_172875	NM_172875	242669	chr4	128932017	128962455	-	2071	1	Azin2
NM_001085509	NM_001085509	242702	chr4	135759715	135815567	+	5539	1	Myom3
NM_153106	NM_153106	242726	chr4	140727355	140742643	-	2315	1	Padi6
NM_001167879	NM_001167879	242915	chr5	30105196	30118380	+	3824	1	Gareml
NM_178730	NM_178730	243083	chr5	86521226	86632424	-	4264	1	Tmprss11f
NM_172881	NM_172881	243085	chr5	87000860	87013274	+	3350	1	Ugt2b35
NM_001081342	NM_001081342	243277	chr5	129096750	129204599	+	5135	1	Adgrd1
NM_001159507	NM_001159507	243547	chr6	91761510	91807393	-	5116	1	Grip2
NM_203491	NM_203491	243764	chr6	36388084	36524774	+	2031	1	Chrm2
NM_001081418	NM_001081418	243842	chr7	15971262	15999495	-	5344	1	Gltscr1
NM_172298	NM_172298	243931	chr7	36698118	36773457	+	4998	1	Tshz3
NM_172901	NM_172901	243996	chr7	50599190	50600528	+	1336	1	4933405O20Rik
NM_153108	NM_153108	244334	chr8	19445770	19447606	-	282	1	Defb8
NM_172913	NM_172913	244579	chr8	90247112	90348252	-	3184	1	Tox3
NM_172914	NM_172914	244608	chr8	95534100	95558888	+	1260	1	Ccdc113
NM_001081337	NM_001081337	244668	chr8	125418063	125492710	-	6342	1	Sipa1l2
NM_172924	NM_172924	244895	chr9	56201129	56418050	-	10970	1	Peak1
NM_172928	NM_172928	245038	chr9	111439081	111489611	+	3491	1	Dclk3
NM_144557	NM_144557	245049	chr9	120304073	120474834	+	4743	1	Myrip
NM_177743	NM_177743	245050	chr9	121950988	121980208	+	3615	1	Fam198a
NM_001101484	NM_001101484	245347	chrX	12651883	12652820	+	935	1	Gm4984
NM_177748	NM_177748	245615	chrX	136448107	136469041	-	1723	1	Kir3dl2
NM_139134	NM_139134	246048	chr16	78930948	78951728	+	2522	1	Chodl
NM_144944	NM_144944	246313	chr2	132370329	132385447	-	4528	1	Prokr2
NM_145848	NM_145848	252910	chr7	10747502	10749538	-	2034	1	Vmn1r71
NM_001011737	NM_001011737	257883	chr10	78611669	78618074	-	1156	1	Olfr1357
NM_001011782	NM_001011782	257947	chr7	102476773	102477902	-	1127	1	Olfr543
NM_001011816	NM_001011816	258060	chr2	88423088	88424023	-	934	1	Olfr1181
NM_001011837	NM_001011837	258113	chr14	50710332	50711255	+	922	1	Olfr748
NM_207152	NM_207152	258259	chr4	118753595	118754536	-	940	1	Olfr1338
NM_146271	NM_146271	258268	chr14	52389815	52390771	-	955	1	Olfr1511
NM_146286	NM_146286	258283	chr9	40022395	40023327	+	931	1	Olfr981
NM_146369	NM_146369	258366	chr6	43216915	43217880	+	964	1	Olfr434
NM_146374	NM_146374	258371	chr2	37331749	37332732	+	982	1	Olfr368
NM_146392	NM_146392	258387	chr14	14175130	14176080	-	949	1	Olfr720
NM_146396	NM_146396	258391	chr2	111269454	111270365	-	910	1	Olfr1277
NM_146412	NM_146412	258407	chr11	87913920	87915003	-	1081	1	Olfr464
NM_146434	NM_146434	258426	chr2	85438209	85439156	-	946	1	Olfr995
NM_146462	NM_146462	258454	chr2	88817173	88818102	+	928	1	Olfr1202
NM_146493	NM_146493	258486	chr14	50186262	50187218	-	955	1	Olfr730
NM_146544	NM_146544	258537	chr10	129268386	129269321	-	934	1	Olfr777
NM_146566	NM_146566	258559	chr9	18875329	18876276	+	946	1	Olfr830
NM_146572	NM_146572	258565	chr2	85721407	85722351	+	943	1	Olfr1009
NM_146732	NM_146732	258727	chr7	108255192	108256136	-	943	1	Olfr488
NM_146751	NM_146751	258746	chr7	104179456	104180406	-	949	1	Olfr648
NM_146761	NM_146761	258756	chr1	174430430	174431384	+	953	1	Olfr414
NM_146781	NM_146781	258777	chr9	38815408	38816539	+	1129	1	Olfr922
NM_146808	NM_146808	258804	chr2	89439270	89440343	-	1071	1	Olfr1240
NM_146862	NM_146862	258861	chr10	129011287	129012216	+	928	1	Olfr763
NM_146911	NM_146911	258913	chr11	50984703	50985626	+	922	1	Olfr1377
NM_146933	NM_146933	258935	chr10	129500886	129501854	+	967	1	Olfr790
NM_146945	NM_146945	258947	chr2	36640041	36640976	+	934	1	Olfr345
NM_146947	NM_146947	258949	chr2	36376778	36377698	+	919	1	Olfr338
NM_146960	NM_146960	258962	chr7	140646452	140652919	+	1159	1	Olfr53
NM_146971	NM_146971	258973	chr2	89248721	89249692	-	970	1	Olfr1228
NM_146982	NM_146982	258984	chr2	89880828	89881757	+	928	1	Olfr1257
NM_147003	NM_147003	259005	chr11	74044325	74045272	-	946	1	Olfr139
NM_207134	NM_207134	259022	chr2	86413109	86414050	-	940	1	Olfr1061
NM_147063	NM_147063	259066	chr7	99735145	99736095	+	949	1	Olfr520
NM_147067	NM_147067	259070	chr9	18856627	18857592	+	964	1	Olfr829
NM_147075	NM_147075	259078	chr7	104617657	104618646	+	988	1	Olfr656
NM_147102	NM_147102	259106	chr7	102604356	102605309	+	952	1	Olfr552
NM_001146349	NM_001146349	268291	chr10	31501887	31609725	-	2852	1	Rnf217
NR_037978	NR_037978	268498	chr11	109139291	109144369	-	1075	1	E030025P04Rik
NM_001252508	NM_001252508	268595	chr12	105453856	105493095	+	5782	1	D430019H16Rik
NM_178747	NM_178747	268756	chr14	65986787	66009210	-	2251	1	Gulo
NM_172961	NM_172961	268860	chr16	8513429	8621567	+	4617	1	Abat
NM_206958	NM_206958	268977	chr17	75178810	75392967	+	6739	1	Ltbp1
NM_201354	NM_201354	269037	chr18	75431221	75697696	-	6162	1	Ctif
NM_206973	NM_206973	269053	chr19	4139799	4145740	+	3920	1	Gpr152
NM_199021	NM_199021	269109	chr1	123332138	124045559	-	4602	1	Dpp10
NM_001161665	NM_001161665	269152	chr1	178529125	178932857	+	7389	1	Kif26b
NM_173007	NM_173007	269831	chr6	21771395	21852515	-	2479	1	Tspan12
NM_173016	NM_173016	270097	chr8	114205640	114374070	+	3644	1	Vat1l
NM_173018	NM_173018	270163	chr9	59751174	59928866	+	11928	1	Myo9a
NM_178753	NM_178753	270624	chrX	95022507	95026682	-	4173	1	Spin4
NM_199022	NM_199022	271849	chr2	125627447	125724148	-	4806	1	Shc4
NM_177777	NM_177777	276852	chr11	113684412	113694647	+	2189	1	D11Wsu47e
NM_207253	NM_207253	276865	chr11	52213052	52213987	-	934	1	Olfr1371
NM_199023	NM_199023	277496	chr2	181696795	181698442	-	710	1	Lkaaear1
NM_207254	NM_207254	277562	chr2	111420032	111420949	-	916	1	Olfr1286
NM_177787	NM_177787	277898	chr6	137983590	138079916	-	2451	1	Slc15a5
NM_177789	NM_177789	278180	chrX	96247203	96293438	-	1423	1	Vsig4
NR_045722	NR_045722	278725	chr16	34952026	34958864	-	3476	1	E130310I04Rik
NM_001111140	NM_001111140	278795	chr19	10455371	10457447	-	2074	1	Lrrc10b
NM_175033	NM_175033	280621	chr7	28284652	28291134	-	1207	1	BC089491
NM_178211	NM_178211	319160	chr13	21750145	21750553	-	406	1	Hist1h4k
NM_175667	NM_175667	319196	chr2	136532321	136555854	+	2710	1	Ankef1
NR_015588	NR_015588	319216	chr5	57570084	57717919	-	721	1	4932441J04Rik
NR_040396	NR_040396	319405	chr9	81632358	81645156	+	1500	1	D430036J16Rik
NR_045312	NR_045312	319454	chr11	119820811	119834365	-	1286	1	Rptoros
NM_001004367	NM_001004367	319478	chr3	134236495	134262089	+	5612	1	Cxxc4
NM_176930	NM_176930	319504	chr12	44328885	44601846	+	7539	1	Nrcam
NR_102306	NR_102306	319596	chr1	107917259	107950947	+	2101	1	D830032E09Rik
NR_015517	NR_015517	319616	chr5	128579130	128600687	-	2399	1	5930412G12Rik
NM_001195284	NM_001195284	319636	chr4	53631471	53707009	+	7452	1	Fsd1l
NM_178767	NM_178767	319660	chr12	37241639	37581932	+	2140	1	Agmo
NM_198649	NM_198649	319713	chr18	61799393	61911824	-	4509	1	Ablim3
NR_045727	NR_045727	319752	chr7	61529410	61615327	-	2053	1	B230209E15Rik
NM_176996	NM_176996	319757	chr6	29735497	29761366	+	3963	1	Smo
NM_177002	NM_177002	319800	chr19	8335623	8405105	-	1985	1	Slc22a30
NR_045836	NR_045836	319803	chr13	114124348	114151592	-	3673	1	A430090L17Rik
NM_001168684	NM_001168684	319880	chr10	94575257	94590954	+	5445	1	Tmcc3
NM_001081316	NM_001081316	319901	chr1	111858702	111864918	-	5759	1	Dsel
NR_015539	NR_015539	319903	chr14	84458838	84476424	-	2050	1	9630013A20Rik
NM_177034	NM_177034	319924	chr19	23758876	23949597	+	6617	1	Apba1
NR_015574	NR_015574	319960	chr8	95806830	95821728	+	2799	1	4930513N10Rik
NM_177047	NM_177047	319974	chr5	131437682	132542343	-	6038	1	Auts2
NR_040705	NR_040705	320014	chr8	10870422	10882454	-	3079	1	B930025P03Rik
NM_177059	NM_177059	320027	chr11	52764706	53187347	+	3099	1	Fstl4
NM_178775	NM_178775	320119	chr1	190772879	190911770	-	3978	1	Rps6kc1
NM_001252513	NM_001252513	320355	chr16	75540514	75586061	-	2069	1	Lipi
NM_177152	NM_177152	320398	chr10	125966219	126015359	+	4029	1	Lrig3
NM_177162	NM_177162	320454	chr5	86485877	86518600	-	2860	1	Tmprss11g
NR_030696	NR_030696	320469	chr15	60822965	60831400	+	5127	1	9930014A18Rik
NM_001146045	NM_001146045	320557	chr13	97067287	97129522	+	4506	1	Fam169a
NM_178789	NM_178789	320709	chr15	94629185	95096097	+	2771	1	Tmem117
NM_001145192	NM_001145192	320722	chr17	69439326	69489233	+	2292	1	A330050F15Rik
NR_028416	NR_028416	320749	chr7	4467245	4470884	-	3639	1	D630041G03Rik
NM_177256	NM_177256	320769	chr2	80292470	80295358	+	2886	1	Prdx6b
NM_001146043	NM_001146043	320806	chr13	97137937	97181196	+	4459	1	Gfm2
NM_177278	NM_177278	320858	chr17	68273797	68780086	+	4547	1	L3mbtl4
NM_001033397	NM_001033397	320864	chr11	99328484	99337965	-	2590	1	Krt26
NR_040622	NR_040622	320872	chr2	44059238	44065324	-	1758	1	Arhgap15os
NM_177292	NM_177292	320916	chr5	113550420	113589725	+	3801	1	Wscd2
NM_177307	NM_177307	320997	chr17	32452723	32493320	+	2602	1	Cyp4f39
NM_177310	NM_177310	321003	chr15	81400188	81454888	+	3225	1	Xpnpep3
NM_177371	NM_177371	326623	chr4	63724603	63745113	-	5822	1	Tnfsf15
NR_040638	NR_040638	327760	chr10	61031303	61038080	+	1128	1	Gm20611
NR_038032	NR_038032	327812	chr10	105574551	105583870	+	3201	1	Gm15663
NM_001177570	NM_001177570	327963	chr11	74070170	74087301	+	4802	1	Zfp616
NM_001037746	NM_001037746	328099	chr12	57230412	57242168	+	4002	1	Prps1l3
NM_177809	NM_177809	328258	chr13	56438355	56472363	+	1488	1	Slc25a48
NR_046142	NR_046142	328263	chr13	60029711	60116669	+	3729	1	A530065N20Rik
NR_030701	NR_030701	328287	chr13	72623466	72628564	-	5098	1	Gm20554
NM_175171	NM_175171	328329	chr13	102732489	103334492	-	10639	1	Mast4
NR_121588	NR_121588	328354	chr14	13157388	13284638	-	1917	1	Gm5087
NR_046164	NR_046164	328747	chr17	15231585	15240783	-	1174	1	Gm5091
NM_177822	NM_177822	328783	chr17	25736040	25748330	+	2610	1	Mslnl
NR_045400	NR_045400	328957	chr18	54611744	54639870	+	1837	1	9330117O12Rik
NM_001289497	NM_001289497	329093	chr1	10324719	10719945	-	1803	1	Cpa6
NM_175510	NM_175510	329178	chr1	66468447	66699148	+	13466	1	Unc80
NM_001033408	NM_001033408	329207	chr1	91145103	91170795	+	3833	1	Rbm44
NM_177845	NM_177845	329502	chr2	120166412	120245335	-	4455	1	Pla2g4e
NM_183221	NM_183221	329628	chr3	38886940	39011983	+	16088	1	Fat4
NR_040553	NR_040553	329780	chr3	155976354	156008592	+	3446	1	9330178D15Rik
NM_001085515	NM_001085515	329828	chr4	41495601	41503075	-	4171	1	AI464131
NM_001126316	NM_001126316	329993	chr4	144777204	144786583	-	1426	1	Gm438
NR_033138	NR_033138	330004	chr4	152697540	152700922	+	1288	1	Gm833
NM_001033415	NM_001033415	330096	chr5	67607883	67613987	+	3750	1	Shisa3
NM_001256184	NM_001256184	330097	chr5	67941669	67977070	+	537	1	Gm5108
NM_177879	NM_177879	330222	chr5	141241534	142213791	+	8466	1	Sdk1
NM_198884	NM_198884	330406	chr6	120203810	120294559	-	2940	1	B4galnt3
NM_177901	NM_177901	330820	chr8	87563907	87589197	+	1015	1	4933402J07Rik
NM_178906	NM_178906	330941	chr9	52673032	52679437	-	5631	1	AI593442
NM_001243265	NM_001243265	330951	chr9	58032274	58048997	+	2792	1	Gm16130
NR_040769	NR_040769	330958	chr9	62242596	62244100	-	1202	1	A730043L09Rik
NM_001037747	NM_001037747	332579	chr2	26352312	26359547	-	1598	1	Card9
NM_001034872	NM_001034872	332942	chr4	130209109	130222295	-	2196	1	Gm853
NM_001010836	NM_001010836	333654	chr7	19361216	19378533	+	3115	1	Ppp1r13l
NR_040353	NR_040353	338535	chr2	12301246	12312315	+	2771	1	E030013I19Rik
NR_002866	NR_002866	353504	chr12	110275385	110278068	-	1275	1	Dio3os
NM_183035	NM_183035	360211	chr8	19123752	19126540	+	243	1	Defb34
NR_046013	NR_046013	380765	chr12	73364075	73409563	-	685	1	D830013O20Rik
NM_001004158	NM_001004158	380907	chr14	59158503	59178749	-	622	1	Gm5142
NM_001030294	NM_001030294	380924	chr14	80000302	80021930	+	1632	1	Olfm4
NM_201529	NM_201529	380928	chr14	101729928	101934693	+	6071	1	Lmo7
NR_045143	NR_045143	380934	chr14	123169186	123176176	+	2048	1	AA536875
NM_001002900	NM_001002900	380975	chr15	100364585	100383955	+	500	1	Higd1c
NM_001099664	NM_001099664	381073	chr17	24657330	24658425	-	603	1	Npw
NM_201363	NM_201363	381286	chr1	107271201	107278371	-	1649	1	Serpinb3c
NM_198656	NM_198656	381409	chr2	178430515	178487366	+	2966	1	Cdh26
NM_001081200	NM_001081200	381457	chr3	93144787	93149471	+	1624	1	Crnn
NR_040591	NR_040591	381482	chr3	149274737	149279980	+	2421	1	Gm1653
NM_001012323	NM_001012323	381530	chr4	62050235	62054117	-	877	1	Mup20
NM_001033773	NM_001033773	381534	chr4	100478867	100550145	+	1505	1	Ube2u
NM_198664	NM_198664	381605	chr4	46604390	46650199	-	4290	1	Tbc1d2
NM_001005426	NM_001005426	381678	chr5	137787802	137822621	+	2199	1	Zcwpw1
NM_001080815	NM_001080815	381853	chr7	19157125	19166127	-	1776	1	Gipr
NM_001080817	NM_001080817	382066	chr9	31315107	31378543	+	3386	1	Prdm10
NM_001037907	NM_001037907	382089	chr9	87015537	87019916	+	496	1	Ripply2
NM_198674	NM_198674	382109	chr9	109717566	109746089	-	1812	1	Fbxw26
NM_001033473	NM_001033473	382384	chr10	79639526	79645738	-	1242	1	Odf3l2
NM_001166706	NM_001166706	384522	chr7	5146490	5147422	-	931	1	Vmn1r55
NM_001079931	NM_001079931	384814	chr8	43673658	43699491	-	2559	1	Gm5347
NM_207263	NM_207263	384997	chr3	90726906	90741517	+	2216	1	Pglyrp4
NM_001008424	NM_001008424	386463	chr17	35552128	35557180	+	2674	1	Cdsn
NR_029721	NR_029721	387191	chr11	96265164	96265265	+	101	1	Mir196a-1
NR_029591	NR_029591	387200	chr19	22750605	22750672	+	67	1	Mir204
NR_029592	NR_029592	387201	chr1	193507463	193507530	-	67	1	Mir205
NR_029536	NR_029536	387230	chr17	17830188	17830257	+	69	1	Mir99b
NR_029567	NR_029567	387237	chr6	29022619	29022691	+	72	1	Mir129-1
NM_207027	NM_207027	387352	chr6	132909651	132910586	+	934	1	Tas2r125
NM_201641	NM_201641	394430	chr1	88055411	88220002	+	3235	1	Ugt1a10
NR_038011	NR_038011	402734	chr1	151138034	151144095	+	2633	1	C730036E19Rik
NM_207540	NM_207540	404242	chr7	48020971	48027597	-	1176	1	Mrgprx1
NM_207000	NM_207000	404634	chr10	61738647	61783864	-	1899	1	H2afy2
NM_001002005	NM_001002005	406218	chr15	89059726	89070907	+	3407	1	Panx2
NM_001001180	NM_001001180	407812	chr7	140809677	140822178	-	3904	1	Zfp941
NR_033559	NR_033559	414067	chr6	95290574	95333993	-	3649	1	AY512915
NR_029447	NR_029447	414101	chr10	79851377	79854971	-	3594	1	E130317F20Rik
NR_102314	NR_102314	414116	chr11	31800688	31824547	-	582	1	D630024D03Rik
NM_001013411	NM_001013411	432450	chr10	31689319	32889915	-	3196	1	Nkain2
NR_004444	NR_004444	432855	chr14	55073091	55075874	+	2485	1	Zfhx2os
NM_001134480	NM_001134480	433022	chr16	45959261	46010413	-	7331	1	Plcxd2
NR_045150	NR_045150	433047	chr16	88811440	88812220	-	780	1	Gm20741
NM_001034885	NM_001034885	433091	chr17	28858411	28890308	+	4471	1	Pnpla1
NM_001033547	NM_001033547	433386	chr1	182747126	182749180	-	2052	1	Ccdc185
NR_002688	NR_002688	433406	chr1	30941592	30949710	-	2777	1	Gm13363
NR_040639	NR_040639	433426	chr2	51656966	51732009	-	2402	1	Gm13490
NM_001097977	NM_001097977	433486	chr2	151086786	151092350	-	2666	2	Gm14151
NM_001013393	NM_001013393	433719	chr4	73401032	73405072	-	1315	1	Gm11487
NM_001033489	NM_001033489	433809	chr4	152307023	152318625	-	2460	1	Rnf207
NM_001004182	NM_001004182	434008	chr6	40110253	40248353	+	3087	1	Tmem178b
NM_001004190	NM_001004190	434377	chr9	20345136	20385158	-	4723	1	Zfp560
NM_025274	NM_025274	434423	chr9	78367054	78368199	-	634	1	Dppa5a
NM_001008428	NM_001008428	434440	chr9	109217432	109234754	-	1499	1	Fbxw20
NM_001013820	NM_001013820	434674	chr19	8062209	8131982	-	1992	1	Slc22a28
NM_001033979	NM_001033979	435811	chr4	137570876	137575180	-	1822	1	Ldlrad2
NM_001272045	NM_001272045	436059	chr8	105000853	105020410	+	1664	1	Ces2h
NR_040657	NR_040657	442820	chr10	33222345	33256357	-	1841	1	D830005E20Rik
NM_001081061	NM_001081061	544971	chr13	100017994	100104070	-	9880	1	Bdp1
NM_001024717	NM_001024717	545276	chr19	5298331	5308739	+	2417	1	Gal3st3
NM_001024719	NM_001024719	545288	chr19	39608859	39649042	-	1695	1	Cyp2c67
NM_001024720	NM_001024720	545370	chr1	150562502	150993435	-	18205	1	Hmcn1
NM_001039594	NM_001039594	545548	chr3	92925287	92926230	-	545	1	Lce3a
NM_001190403	NM_001190403	545562	chr3	113147656	113156727	-	1401	1	Amy2b
NR_040659	NR_040659	545641	chr4	82065380	82102807	+	1075	1	Gm5860
NM_001085535	NM_001085535	546519	chr11	117860752	117865543	+	1814	1	Tmem235
NR_045156	NR_045156	619327	chr13	47910435	47934301	+	3499	1	G630093K05Rik
NM_001135093	NM_001135093	619665	chr6	30956021	30958990	-	2967	1	Klf14
NR_045866	NR_045866	619945	chr5	74949194	74966368	+	1428	1	Gm6116
NM_001081653	NM_001081653	620292	chr17	57769570	58410342	+	3893	1	Cntnap5c
NM_001105181	NM_001105181	620697	chr7	85221518	85237704	-	2549	1	Vmn2r68
NM_001277919	NM_001277919	622019	chr4	4527774	4529458	-	1682	1	Gm11780
NM_001160412	NM_001160412	622117	chr8	43183122	43193884	+	1458	1	Triml2
NM_001037913	NM_001037913	622404	chr4	43493365	43495921	+	806	1	Ccdc107
NM_001081295	NM_001081295	622434	chr3	62338777	62462221	+	5189	1	Arhgef26
NM_001206661	NM_001206661	622645	chr17	68837136	68843138	+	3209	1	Tmem200c
NM_001039173	NM_001039173	623279	chr18	89301135	89769136	-	987	1	Dok6
NR_040750	NR_040750	624759	chr3	159076364	159308080	+	2827	1	Gm20752
NM_001037929	NM_001037929	627302	chr2	145549455	145554982	-	1809	1	Gm14092
NR_046027	NR_046027	627800	chr10	92171301	92375373	-	1595	1	Gm20757
NR_027858	NR_027858	627984	chr11	71242430	71285232	-	3444	1	Nlrp1c-ps
NM_001099688	NM_001099688	628100	chr11	72314444	72319419	+	1705	1	Fbxo39
NR_033589	NR_033589	628431	chr8	33484311	33485757	+	1446	1	Hmgb1-rs17
NR_028441	NR_028441	628490	chr7	42430105	42430369	-	264	1	Vmn2r-ps60
NM_001177567	NM_001177567	628870	chr10	107762310	107912134	-	6924	1	Otogl
NR_033141	NR_033141	629678	chr14	77479483	77506868	-	1157	1	Gm6994
NM_001102582	NM_001102582	632671	chr5	151561661	151586924	-	2378	1	Vmn2r18
NM_001277170	NM_001277170	633285	chr3	82836523	82876483	-	3578	1	Rbm46
NM_001122977	NM_001122977	635895	chr17	13948373	13950678	+	1599	1	Gm7168
NM_001077425	NM_001077425	636808	chr1	115685137	116580674	+	3890	1	Cntnap5a
NM_001104614	NM_001104614	637004	chr3	64258961	64287417	-	2662	1	Vmn2r3
NM_001105057	NM_001105057	637898	chr7	42116471	42195776	+	2555	1	Vmn2r60
NM_001167586	NM_001167586	639025	chr9	36431884	36434938	+	513	1	Gm7257
NR_002881	NR_002881	654456	chr8	19300677	19304794	+	202	1	Defa-ps13
NM_001039124	NM_001039124	654462	chr4	115884400	115887964	+	945	1	Kncn
NR_015562	NR_015562	654796	chr5	28466984	28719209	+	2919	1	9530036O11Rik
NR_028445	NR_028445	654805	chr11	64433135	64436674	-	3539	1	F930015N05Rik
NR_033607	NR_033607	664619	chr18	17234483	17235482	-	999	1	4921533I20Rik
NM_029384	NM_029384	664968	chr7	4784785	4789560	-	1047	1	Tmem238
NR_033529	NR_033529	665005	chr9	56027636	56031573	+	3937	1	Gm7444
NM_001163007	NM_001163007	665113	chr3	28263214	28670585	+	7057	1	Tnik
NM_001166734	NM_001166734	665150	chr7	5220478	5221410	+	931	1	Vmn1r57
NR_046033	NR_046033	665194	chr5	119194313	119200018	-	1516	1	Gm7538
NM_001081422	NM_001081422	665775	chr5	41787540	41844315	-	10509	1	Bod1l
NM_001085549	NM_001085549	666048	chr4	114406724	114615098	+	6608	1	Trabd2b
NM_174875	NM_174875	666468	chr3	103643953	103646068	-	2113	1	Atg4a
NR_046039	NR_046039	666589	chr8	32151895	32181847	+	1610	1	Gm8179
NR_036696	NR_036696	667335	chr6	3288519	3317019	+	730	1	Gm8579
NM_001005858	NM_001005858	667370	chr19	34607957	34613401	+	2009	1	Ifit3b
NM_148413	NM_148413	667663	chr2	22227503	22423370	+	2549	1	Myo3a
NR_027658	NR_027658	667931	chr1	71888112	71891204	+	1016	1	Gm8883
NM_029139	NM_029139	668110	chr8	113643213	113655533	+	887	1	Syce1l
NM_001214911	NM_001214911	668225	chr15	101050192	101054399	-	4206	1	Fignl2
NM_001288801	NM_001288801	668725	chr7	47234919	47252848	-	1048	1	Mrgpra9
NM_001101609	NM_001101609	668814	chr14	118267158	118267770	+	610	1	Gm9376
NR_033467	NR_033467	670775	chr2	166273908	166294831	+	380	1	Gm11468
NR_028584	NR_028584	670833	chr4	63596901	63600764	-	522	1	Gm11213
NM_001163996	NM_001163996	675812	chr5	110110092	110129794	+	3151	1	Zfp605
NR_029823	NR_029823	723815	chr9	112118636	112118711	-	75	1	Mir128-2
NR_029798	NR_029798	723822	chr5	48223942	48224051	+	109	1	Mir218-1
NR_029806	NR_029806	723827	chrX	19146294	19146388	-	94	1	Mir221
NR_029789	NR_029789	723837	chr4	56895229	56895298	-	69	1	Mir32
NR_029884	NR_029884	723860	chr8	38252133	38252202	-	69	1	Mir383
NR_030403	NR_030403	723948	chr3	127545228	127545301	+	73	1	Mir302b
NR_029540	NR_029540	723952	chr16	77646273	77646343	+	70	1	Mir125b-2
NR_030477	NR_030477	735262	chr4	63256851	63256932	+	81	1	Mir455
NR_030486	NR_030486	735267	chr6	85336292	85336373	-	81	1	Mir705
NR_030488	NR_030488	735269	chr7	44849699	44849771	+	72	1	Mir707
NR_030473	NR_030473	735273	chr12	91110229	91123337	+	32	1	Mir669c
NR_109835	NR_109835	735288	chr13	74407065	74407173	+	108	2	Mir692-2
NR_030465	NR_030465	751529	chr17	6895229	6895337	-	108	1	Mir692-1
NR_030758	NR_030758	751533	chrX	74023849	74023936	-	87	1	Mir718
NR_030526	NR_030526	751557	chr15	103014910	103015001	+	91	1	Mir615
NR_030417	NR_030417	791070	chr11	65734733	65734832	-	99	1	Mir744
NR_030429	NR_030429	791074	chr16	93369720	93369816	+	96	1	Mir802
NR_038097	NR_038097	100036768	chr11	109354778	109363654	-	2763	1	Gm11696
NM_001168423	NM_001168423	100038417	chr18	62607540	62741387	-	788	1	Spink13
NR_045882	NR_045882	100038479	chr10	77011995	77022214	+	1545	1	Gm10787
NR_046061	NR_046061	100038494	chr13	56362900	56368857	+	1476	1	Gm10782
NR_033546	NR_033546	100038554	chr8	12706944	12719127	-	3651	1	Gm15348
NR_045886	NR_045886	100038566	chr9	57056897	57071966	-	1130	1	Gm10658
NR_033475	NR_033475	100038623	chr16	27849930	27926128	+	810	1	Gm10823
NR_033538	NR_033538	100038689	chr12	117144523	117151269	-	839	1	Gm10421
NR_040421	NR_040421	100038714	chr6	72629831	72637717	+	1458	1	Gm15401
NR_033495	NR_033495	100038743	chr2	66440880	66547472	+	1343	1	Gm13629
NM_001166063	NM_001166063	100039139	chr15	3280627	3303526	-	787	1	Ccdc152
NR_110432	NR_110432	100039691	chr13	97434970	97497664	+	3381	1	Lncenc1
NR_033636	NR_033636	100039727	chr6	147690241	147702374	+	917	1	1700049E15Rik
NR_046067	NR_046067	100039954	chr8	50368112	50416089	+	949	1	Gm2516
NR_046068	NR_046068	100040567	chr4	45762377	45764223	-	643	1	Gm12409
NR_040286	NR_040286	100040792	chr11	102576399	102579119	-	674	1	Gm11627
NR_036607	NR_036607	100040999	chr12	69963409	69969744	+	625	1	Gm3086
NR_028586	NR_028586	100041311	chr11	6650148	6660236	-	1300	1	Gm11978
NM_001101631	NM_001101631	100041351	chr10	77861975	77862638	+	661	1	Gm3285
NR_030682	NR_030682	100042332	chr11	120186650	120189856	-	1704	1	2810410L24Rik
NR_030680	NR_030680	100042415	chr14	9884095	9886868	+	2773	1	Mnd1-ps
NM_001281470	NM_001281470	100042855	chr18	44156403	44159885	-	338	1	Gm10267
NR_102715	NR_102715	100043065	chr12	31168862	31185922	+	1554	1	6030469F06Rik
NR_046075	NR_046075	100043132	chr14	71251273	71271059	+	674	1	Gm4251
NM_001163611	NM_001163611	100043254	chr7	135268619	135272942	+	855	1	Nps
NR_028311	NR_028311	100043335	chr15	96182800	96203470	+	1608	1	Gm4371
NR_028023	NR_028023	100043644	chr17	71333201	71341804	-	529	1	Gm4566
NM_001099329	NM_001099329	100043860	chr7	33743799	33745103	+	395	1	Scgb1b24
NM_001099330	NM_001099330	100043868	chr7	34095431	34100837	+	486	1	Scgb1b30
NR_040359	NR_040359	100045469	chr2	158595472	158610723	-	1551	1	Gm14204
NR_030645	NR_030645	100124448	chr1	10708387	10865874	-	51	1	Mir467e
NR_030611	NR_030611	100124452	chr14	63727189	63727267	+	78	1	Mir598
NM_001278271	NM_001278271	100169864	chrX	74367447	74373349	-	1178	1	SlcUbl4a
NM_001177525	NM_001177525	100170401	chr7	43214039	43226842	+	1422	1	EU599041
NR_028570	NR_028570	100216538	chr11	116674597	116674672	+	75	1	Snord1a
NR_028543	NR_028543	100217446	chr1	161038092	161038156	+	64	1	Snord47
NR_028556	NR_028556	100217462	chr17	71631279	71631361	+	82	1	Snord92
NR_028273	NR_028273	100302592	chr2	32777988	32778009	+	21	1	Snord14a
NR_028577	NR_028577	100303738	chr12	84875802	84879755	+	3953	1	D030025P21Rik
NR_028571	NR_028571	100306954	chr2	26639190	26639321	-	131	1	Snora17
NR_028573	NR_028573	100306957	chr3	123507937	123508066	-	129	1	Snora24
NM_001167540	NM_001167540	100312477	chr7	26266831	26267775	+	943	1	Vmn1r184
NR_031758	NR_031758	100313943	chr5	74093530	74093650	+	120	1	Snora26
NR_035438	NR_035438	100316681	chr9	21032251	21032328	-	77	1	Mir1900
NR_035459	NR_035459	100316693	chr12	40222712	40222811	-	99	1	Mir1938
NR_035476	NR_035476	100316703	chr2	115638725	115638813	+	88	1	Mir1951
NR_035501	NR_035501	100316717	chr7	81529916	81529988	+	72	1	Mir1839
NR_035440	NR_035440	100316809	chr12	109544541	109544620	+	79	2	Mir1906-1
NR_037309	NR_037309	100499526	chr12	36415616	36492195	+	69	2	Mir3472
NM_001271591	NM_001271591	100502825	chr5	115102922	115107962	-	673	1	Rpl37rt
NR_038463	NR_038463	100502842	chrX	57200637	57204376	+	754	1	Gm14718
NR_037973	NR_037973	100502868	chr10	53498443	53518989	-	5482	1	Gm20597
NR_040295	NR_040295	100502917	chr11	38491548	38520045	-	2450	1	Gm12130
NM_001205035	NM_001205035	100502921	chr10	77715807	77716169	+	361	1	Gm10142
NM_001195253	NM_001195253	100502950	chr8	70718543	70722635	+	1146	1	Gm3336
NR_036457	NR_036457	100503044	chr3	121637126	121643485	-	987	1	A730020M07Rik
NR_045094	NR_045094	100503434	chr17	83033592	83078225	-	1539	1	Gm19689
NR_037666	NR_037666	100503704	chr16	4935164	4939585	-	1528	1	Gm16861
NR_045049	NR_045049	100504101	chr12	61499660	61521820	-	1086	1	Gm20063
NM_181990	NM_181990	100504164	chr8	104293542	104310145	-	1124	1	Cmtm1
NR_036629	NR_036629	100504221	chr2	153780879	153795182	+	1455	1	Efcab8
NM_001204913	NM_001204913	100504323	chr1	25276404	25277954	-	1548	1	Gm20172
NR_040372	NR_040372	100504350	chr2	156609198	156613422	-	2523	1	Gm14169
NR_045032	NR_045032	100504486	chr12	32824116	32826908	+	2792	1	Gdap10
NR_105062	NR_105062	100505025	chr7	73310380	73315193	+	1815	1	LOC100505025
NR_037214	NR_037214	100526464	chr8	16168757	16168838	-	81	1	Mir3106
NR_037223	NR_037223	100526468	chr11	95963292	95963383	-	91	1	Mir3063
NR_037285	NR_037285	100526558	chr7	61790519	61790581	-	62	1	Mir344b
NR_045917	NR_045917	100534633	chrX	36910834	36911985	+	456	1	Gm15008
NR_039589	NR_039589	100628596	chr18	81992010	81992080	-	70	1	Mir5127
NR_039593	NR_039593	100628600	chr14	45657961	45658053	-	92	1	Mir5131
NR_039573	NR_039573	100628612	chr15	80940039	80940120	+	81	1	Mir5113
NR_046233	NR_046233	100861531	chr17	39842997	39848829	+	5832	1	Rn45s
NM_001270685	NM_001270685	100862314	chrX	3835879	3836656	-	775	3	Gm21637
NR_049205	NR_049205	100885844	chr17	67026147	67026235	-	88	1	Mir5709
NR_105751	NR_105751	102465169	chr2	56785811	56785907	+	96	1	Mir195b
NR_105754	NR_105754	102465171	chr2	42447439	42447568	-	129	1	Mir6336
NR_105764	NR_105764	102465176	chr1	118954220	118954299	+	79	1	Mir6346
NR_105766	NR_105766	102465178	chr1	168490643	168490762	+	119	1	Mir6348
NR_105817	NR_105817	102465209	chr15	87795850	87795943	-	93	1	Mir6393
NR_105830	NR_105830	102465217	chr7	143933115	143933208	+	93	1	Mir6404
NR_105846	NR_105846	102465227	chr5	137529480	137529594	-	114	1	Mir6418
NR_105865	NR_105865	102465542	chr1	92464483	92464542	-	59	1	Mir6900
NR_105891	NR_105891	102465558	chr11	74868127	74868194	-	67	1	Mir6926
NR_105963	NR_105963	102465603	chr2	29995950	29996020	+	70	1	Mir6997
NR_105985	NR_105985	102465616	chr4	137538286	137538370	+	84	1	Mir7018
NR_106073	NR_106073	102465700	chr17	27317035	27317095	-	60	1	Mir7214
NR_106091	NR_106091	102465711	chr6	81895590	81895663	-	73	1	Mir7232
NR_106137	NR_106137	102465776	chr15	78348599	78348660	+	61	2	Mir7676-1
NR_106169	NR_106169	102465886	chr17	35251289	35251405	+	116	1	Mir8094
NR_106174	NR_106174	102465889	chr14	62837721	62837857	+	136	1	Mir8098
NR_105744	NR_105744	102465959	chr9	110281287	110281409	+	122	1	Mir6236
NR_105902	NR_105902	102465980	chr12	28679325	28679389	+	64	1	Mir6937
NR_105745	NR_105745	102466147	chr9	9894431	9894521	+	90	1	Mir6237
NR_105799	NR_105799	102466155	chr3	34922545	34922651	-	106	1	Mir6378
NR_105835	NR_105835	102466158	chr10	60923023	60923113	+	90	1	Mir6408
NR_106163	NR_106163	102466241	chr9	102304924	102304975	-	51	1	Mir7243
NR_105767	NR_105767	102466631	chr1	39186896	39186992	-	96	1	Mir6349
NR_105801	NR_105801	102466638	chr11	47739592	48074583	-	56	1	Mir6380
NR_105893	NR_105893	102466767	chr11	101030340	101030409	+	69	1	Mir6928
NR_106005	NR_106005	102466792	chr5	140427339	140427409	+	70	1	Mir7038
NR_106130	NR_106130	102466843	chr6	38507325	38507393	+	68	1	Mir7670
NR_106186	NR_106186	102466885	chr9	110635999	110636115	-	116	1	Mir8107
NR_105768	NR_105768	102466969	chr1	47467021	47467125	-	104	1	Mir6350
NR_105896	NR_105896	102466988	chr11	102999848	102999921	-	73	1	Mir6931
NM_001287194	NM_001287194	102577427	chr17	40574711	40579549	+	1108	1	Esp5
NR_110488	NR_110488	102638436	chr3	34772075	34782346	+	1148	1	Gm38509

## Sheet: Pax_IKZF1_unique_genes
Transcript/RepeatID	Gene ID (cmd=analyzeRNA.pl rna mm10 -d Documents/Basespace/Tina-33488506/Tagdirs-Tina/T1-CLP_-_-/)	chr	start	end	strand	Length	Copies	Annotation/Divergence
NM_009746	NM_009746	chr7	127704978	127708766	-	957	1	Bcl7c
NM_010198	NM_010198	chr11	69796068	69801716	-	2610	1	Fgf11
NM_001287217	NM_001287217	chr7	31032723	31042331	-	1018	1	Fxyd5
NM_011676	NM_011676	chr11	78343495	78349164	+	1309	1	Unc119
NM_021437	NM_021437	chr14	54686171	54690742	+	1885	1	1700123O20Rik
NM_025425	NM_025425	chr17	24732685	24736149	+	1030	1	Rpl3l
NM_026257	NM_026257	chr4	134102583	134126780	+	1560	1	Ubxn11
NM_026883	NM_026883	chr5	122364584	122371963	-	974	1	Fam216a
NM_001081005	NM_001081005	chr2	167062934	167065862	+	731	1	1500012F01Rik
NM_027412	NM_027412	chr19	8809075	8819294	-	3464	1	Ttc9c
NM_023626	NM_023626	chr6	21949615	21976037	+	3741	1	Ing3
NM_178627	NM_178627	chr15	83125978	83149336	-	3238	1	Poldip3
NR_045701	NR_045701	chr15	100614140	100615110	-	876	1	C330013E15Rik
NM_030153	NM_030153	chr13	59585333	59634781	+	2589	1	Naa35
NM_033444	NM_033444	chr17	35050243	35058719	+	1151	1	Clic1
NM_054089	NM_054089	chr4	3574879	3616623	+	4312	1	Tgs1
NM_026666	NM_026666	chr16	5050068	5086285	+	6434	1	Ubn1
NM_173382	NM_173382	chr3	53463817	53481755	+	4306	1	Proser1
NM_199221	NM_199221	chr11	114922781	114934386	-	2875	1	Cd300lb
NM_145520	NM_145520	chr2	29774684	29787671	-	3993	1	Trub2
NM_178734	NM_178734	chr7	44731482	44748617	-	3802	1	Zfp473
NR_040371	NR_040371	chr2	129297370	129307826	+	1776	1	Gm14023
NR_106020	NR_106020	chr7	44538106	44538178	-	72	1	Mir7053

## Sheet: Pax_RUNX_unique_genes
Transcript/RepeatID	Gene ID (cmd=analyzeRNA.pl rna mm10 -d Documents/Basespace/Tina-33488506/Tagdirs-Tina/T1-CLP_-_-/)	chr	start	end	strand	Length	Copies	Annotation/Divergence
NM_007381	NM_007381	chr1	66830839	66863309	-	1935	1	Acadl
NM_017366	NM_017366	chr11	70010183	70015428	-	2166	1	Acadvl
NM_015728	NM_015728	chr3	63942324	63964733	-	3113	1	Slc33a1
NM_007392	NM_007392	chr19	34240336	34255373	-	2561	1	Acta2
NM_001037722	NM_001037722	chr3	89339640	89350010	-	2964	1	Adam15
NM_001102444	NM_001102444	chr5	34573714	34632305	+	4029	1	Add1
NM_007419	NM_007419	chr19	56722372	56724862	+	2488	1	Adrb1
NM_021604	NM_021604	chr4	156165290	156197488	-	7341	1	Agrn
NM_009650	NM_009650	chr6	126853098	126874308	+	3145	1	Akap3
NM_007438	NM_007438	chr7	126795234	126799254	-	1500	1	Aldoa
NM_007443	NM_007443	chr4	63143275	63154172	-	1255	1	Ambp
NM_007450	NM_007450	chr8	46207341	46211009	-	1100	1	Slc25a4
NM_009673	NM_009673	chr3	36448924	36475887	-	1708	1	Anxa5
NM_001110300	NM_001110300	chr9	21295457	21312333	-	1725	1	Ap1m2
NM_024406	NM_024406	chr3	10204343	10208576	-	635	1	Fabp4
NM_009682	NM_009682	chr7	79875325	79920640	-	5796	1	Ap3s2
NM_009694	NM_009694	chr17	48419231	48432728	-	1213	1	Apobec2
NM_009698	NM_009698	chr8	122574637	122576907	-	859	1	Aprt
NM_007472	NM_007472	chr6	55336299	55348555	+	2754	1	Aqp1
NM_009699	NM_009699	chr15	99579056	99584545	+	1410	1	Aqp2
NM_007473	NM_007473	chr4	41033074	41048136	-	2514	1	Aqp7
NM_009702	NM_009702	chr2	114101161	114175339	-	4860	1	Aqr
NM_007505	NM_007505	chr18	77773768	77782868	+	2417	1	Atp5a1
NM_009730	NM_009730	chr2	130906496	131030326	+	8706	1	Atrn
NM_009734	NM_009734	chr11	120064430	120086827	-	3550	1	Cep131
NM_007528	NM_007528	chr11	70224127	70229798	-	3415	1	Bcl6b
NM_007541	NM_007541	chr3	88383495	88384466	-	473	1	Bglap
NM_009761	NM_009761	chr14	66985240	67008877	-	3229	1	Bnip3l
NM_013484	NM_013484	chr17	34862602	34882100	-	2624	1	C2
NM_009778	NM_009778	chr17	57203967	57228136	-	5096	1	C3
NM_009787	NM_009787	chr6	47796141	47813512	-	2469	1	Pdia4
NM_009793	NM_009793	chr18	32939041	33195767	+	12318	1	Camk4
NM_001301164	NM_001301164	chr8	104534700	104550343	+	1934	1	Car7
NM_009813	NM_009813	chr1	172209894	172219895	-	1861	1	Casq1
NM_009832	NM_009832	chr12	108179738	108203359	+	2618	1	Ccnk
NM_009833	NM_009833	chr15	98543211	98567636	-	2165	1	Ccnt1
NM_007636	NM_007636	chr10	117050998	117063814	-	1944	1	Cct2
NM_009842	NM_009842	chr7	141467362	141471481	+	1894	1	Cd151
NM_007640	NM_007640	chr3	86986586	86989532	+	1236	1	Cd1d2
NM_013486	NM_013486	chr3	101275908	101287939	-	1137	1	Cd2
NM_007644	NM_007644	chr5	92441311	92505657	-	4707	1	Scarb2
NM_016742	NM_016742	chr9	21138541	21149906	-	2446	1	Cdc37
NM_001301368	NM_001301368	chr4	109660876	109666756	-	2033	1	Cdkn2c
NM_007688	NM_007688	chr12	54858819	54862877	-	2932	1	Cfl2
NM_007691	NM_007691	chr9	36708482	36726658	-	3382	1	Chek1
NR_037153	NR_037153	chr15	89426349	89429927	-	1912	1	Chkb
NR_073190	NR_073190	chr19	3851773	3894369	+	2674	1	Chka
NM_007708	NM_007708	chr5	115845656	116006341	+	6847	1	Cit
NM_009897	NM_009897	chr2	121358641	121363737	+	1578	1	Ckmt1
NM_007712	NM_007712	chr3	89164795	89177087	+	2305	1	Clk2
NM_013806	NM_013806	chr19	43782308	43838218	+	5355	1	Abcc2
NM_009919	NM_009919	chr14	46775568	46788357	-	1476	1	Cnih1
NM_013807	NM_013807	chr4	117128655	117133963	-	2361	1	Plk3
NM_007742	NM_007742	chr11	94936224	94953042	+	5877	1	Col1a1
NM_001285512	NM_001285512	chr2	125830302	125859082	-	3349	1	Cops2
NM_009940	NM_009940	chr7	118525062	118533356	-	906	1	Coq7
NM_009945	NM_009945	chr9	79755241	79759853	-	748	1	Cox7a2
NM_007757	NM_007757	chr16	58670208	58680389	+	3175	1	Cpox
NM_013495	NM_013495	chr19	3323301	3385733	+	4280	1	Cpt1a
NM_007759	NM_007759	chr3	87948693	87953372	+	894	1	Crabp2
NM_007761	NM_007761	chr5	130029306	130060783	+	1462	1	Crcp
NM_001025432	NM_001025432	chr16	4084048	4213404	-	7474	1	Crebbp
NM_017406	NM_017406	chr17	34647146	34655074	+	2546	1	Atf6b
NM_021351	NM_021351	chr5	112246492	112252518	-	801	1	Cryba4
NM_009968	NM_009968	chr3	154596711	154623182	+	2496	1	Cryz
NM_026444	NM_026444	chr10	128337832	128362479	+	2815	1	Cs
NM_007788	NM_007788	chr2	152226840	152281851	+	4189	1	Csnk2a1
NM_007799	NM_007799	chr1	131638314	131675507	+	2108	1	Ctse
NM_009987	NM_009987	chr9	120048683	120068296	-	3749	1	Cx3cr1
NM_009994	NM_009994	chr17	79706953	79715041	-	5123	1	Cyp1b1
NM_007820	NM_007820	chr5	145436309	145469723	-	1715	1	Cyp3a16
NM_007823	NM_007823	chr4	115624728	115647705	-	1857	1	Cyp4b1
NM_010012	NM_010012	chr9	121914356	121916305	-	1947	1	Cyp8b1
NM_010016	NM_010016	chr1	130439030	130462740	-	2514	1	Cd55
NM_010020	NM_010020	chr13	73536747	73578672	+	3439	1	Slc6a3
NM_001146308	NM_001146308	chr11	5788483	5800980	+	2354	1	Dbnl
NM_007832	NM_007832	chr5	88765013	88783277	+	3048	1	Dck
NM_010024	NM_010024	chr14	118012790	118052246	-	2253	1	Dct
NM_015735	NM_015735	chr19	10605625	10629821	+	4134	1	Ddb1
NM_010027	NM_010027	chr10	75771233	75773374	-	604	1	Ddt
NM_001025296	NM_001025296	chr4	149104142	149120653	+	2459	1	Dffa
NM_001289813	NM_001289813	chr16	18066403	18071632	+	1357	1	Dgcr6
NM_010048	NM_010048	chr16	17840356	17891728	-	4067	1	Dgcr2
NM_007865	NM_007865	chr17	15367354	15375823	-	3415	1	Dll1
NM_032418	NM_032418	chr7	19083849	19093820	+	2743	1	Dmpk
NM_010067	NM_010067	chr2	13510161	13544664	-	2624	1	Trdmt1
NM_007874	NM_007874	chr18	34344886	34373415	-	2890	1	Reep5
NM_013503	NM_013503	chr5	38319509	38322523	+	3012	1	Drd5
NM_007885	NM_007885	chr18	61196854	61211596	-	3857	1	Slc26a2
NM_007889	NM_007889	chr16	20517064	20532187	+	2936	1	Dvl3
NM_010098	NM_010098	chr1	175662421	175692632	-	1763	1	Opn3
NM_007910	NM_007910	chr3	89333393	89338028	-	1590	1	Efna4
NM_007915	NM_007915	chr9	36779153	36797068	-	2097	1	Ei24
NM_010124	NM_010124	chr10	61432497	61452669	-	1781	1	Eif4ebp2
NM_013507	NM_013507	chr7	111067985	111083030	-	7736	1	Eif4g2
NM_023119	NM_023119	chr4	150237197	150248873	+	1762	1	Eno1
NM_007936	NM_007936	chr1	77367185	77515088	-	6308	1	Epha4
NM_007680	NM_007680	chr6	41605482	41620507	+	3736	1	Ephb6
NM_007947	NM_007947	chr2	25657952	25661645	+	690	1	Lcn5
NM_010155	NM_010155	chr7	25242560	25250758	-	3497	1	Erf
NM_053072	NM_053072	chr10	94036001	94145339	+	8021	1	Fgd6
NM_007966	NM_007966	chr6	52313498	52318378	+	2872	1	Evx1
NM_010171	NM_010171	chr3	121723537	121735052	+	1868	1	F3
NM_007980	NM_007980	chr3	122895072	122899506	+	959	1	Fabp2
NM_007991	NM_007991	chr7	28169748	28179269	+	1148	1	Fbl
NM_007994	NM_007994	chr13	62836885	62858370	-	1285	1	Fbp2
NM_007996	NM_007996	chr9	51943025	51963602	-	1206	1	Fdx1
NM_007998	NM_007998	chr18	64456550	64489066	-	2888	1	Fech
NM_008005	NM_008005	chr11	33116978	33147400	-	1531	1	Fgf18
NM_001163215	NM_001163215	chr5	33721724	33737068	+	4225	1	Fgfr3
NM_010209	NM_010209	chr1	175601378	175625635	-	1620	1	Fh1
NM_001301412	NM_001301412	chr4	52439221	52488365	+	5504	1	Smc2
NM_010219	NM_010219	chr6	128430107	128438631	-	2155	1	Fkbp4
NM_023907	NM_023907	chr11	34204341	34208089	-	2350	1	Foxi1
NM_013519	NM_013519	chr8	121116171	121118894	+	2721	1	Foxc2
NM_010228	NM_010228	chr5	147562196	147725988	-	6248	1	Flt1
NM_021355	NM_021355	chr1	134037515	134048277	+	2854	1	Fmod
NM_008031	NM_008031	chrX	68678541	68717961	+	4388	1	Fmr1
NM_010236	NM_010236	chr2	32682609	32694175	-	2246	1	Fpgs
NM_019502	NM_019502	chr7	105640540	105641845	+	992	1	Timm10b
NM_008057	NM_008057	chr1	59482147	59486955	+	4806	1	Fzd7
NM_008076	NM_008076	chr4	33063112	33095865	+	1809	1	Gabrr2
NM_010254	NM_010254	chr11	116280939	116283938	+	1936	1	Galr2
NM_016658	NM_016658	chr4	41755228	41759224	+	2111	1	Galt
NM_010255	NM_010255	chr10	80258151	80260968	-	936	1	Gamt
NR_002840	NR_002840	chr1	161035166	161038537	+	2550	1	Gas5
NM_008106	NM_008106	chrX	74127466	74150755	+	1212	1	Opn1mw
NM_010270	NM_010270	chr6	39801807	39810936	-	1047	1	Mrps33
NM_008110	NM_008110	chr11	53433286	53437902	+	1800	1	Gdf9
NM_010274	NM_010274	chr2	57238382	57370719	+	5601	1	Gpd2
NM_010294	NM_010294	chr5	97455161	97457008	-	1845	1	Gk2
NM_021332	NM_021332	chr17	30901867	30936510	+	1465	1	Glp1r
NM_010305	NM_010305	chr5	18265135	18360413	-	3183	1	Gnai1
NM_010320	NM_010320	chr7	16891786	16895435	+	914	1	Gng8
NM_008145	NM_008145	chr14	67745181	67749436	+	564	1	Gnrh1
NM_010324	NM_010324	chr19	43499753	43524605	-	2046	1	Got1
NM_008154	NM_008154	chr4	133209340	133212536	-	2139	1	Gpr3
NM_001291025	NM_001291025	chr17	25926420	25941989	-	3281	1	Pigq
NM_010341	NM_010341	chr1	86386325	86388141	-	1215	1	Nmur1
NM_010353	NM_010353	chr11	73135484	73138294	-	2808	1	Gsg2
NM_001130008	NM_001130008	chr16	11216241	11254325	-	6805	1	Gspt1
NM_008184	NM_008184	chr3	107938848	107943749	-	1142	1	Gstm6
NM_013541	NM_013541	chr19	4035411	4037912	-	735	1	Gstp1
NM_008185	NM_008185	chr10	75783813	75798584	-	1030	1	Gstt1
NM_010362	NM_010362	chr19	47854989	47864788	+	1153	1	Gsto1
NM_010363	NM_010363	chr12	87147707	87164723	+	1656	1	Gstz1
NM_010364	NM_010364	chr17	35667728	35673743	-	1669	1	Gtf2h4
NM_001267808	NM_001267808	chr17	35263123	35266730	+	1052	1	H2-L
NM_008207	NM_008207	chr17	36005695	36020560	-	2174	1	H2-T24
NM_016763	NM_016763	chrX	152001896	152004442	+	903	1	Hsd17b10
NM_010410	NM_010410	chr11	100761693	100762931	-	580	1	Hcrt
NM_013551	NM_013551	chr9	44336348	44344228	-	1580	1	Hmbs
NM_016884	NM_016884	chr14	52073380	52104028	-	2833	1	Hnrnpc
NM_013557	NM_013557	chr5	143871862	143902717	+	2555	1	Eif2ak1
NM_008289	NM_008289	chr8	105518746	105523988	+	1842	1	Hsd11b2
NM_008291	NM_008291	chr13	64058274	64089201	-	1273	1	Hsd17b3
NM_010476	NM_010476	chr1	169949537	169969205	-	4563	1	Hsd17b7
NM_013559	NM_013559	chr5	149616845	149636315	-	3458	1	Hsph1
NM_008301	NM_008301	chr12	76404370	76406936	+	2564	1	Hspa2
NM_008303	NM_008303	chr1	55088148	55091317	+	762	1	Hspe1
NM_010487	NM_010487	chr9	22015005	22052023	-	5018	1	Elavl3
NM_010498	NM_010498	chrX	70343070	70365085	-	4961	1	Ids
NM_008336	NM_008336	chr4	88690599	88691268	-	667	1	Ifnab
NM_010516	NM_010516	chr3	145646971	145649985	-	2021	1	Cyr61
NM_133836	NM_133836	chr2	11705293	11733985	+	1708	1	Il15ra
NM_010571	NM_010571	chr5	137643032	137645714	-	2333	1	Irs3
NM_008404	NM_008404	chr10	77530348	77565674	+	2844	1	Itgb2
NM_001281968	NM_001281968	chr11	46325148	46389515	-	4252	1	Itk
NM_008408	NM_008408	chr9	36732413	36767578	-	2677	1	Stt3a
NM_010588	NM_010588	chr12	112908590	112929495	-	4026	1	Jag2
NM_008415	NM_008415	chr15	74702412	74709322	-	5525	1	Jrk
NM_008424	NM_008424	chr16	92346001	92359468	-	3151	1	Kcne1
NM_008431	NM_008431	chr19	6925690	6934515	-	1726	1	Kcnk4
NM_175088	NM_175088	chr6	15720661	15802169	+	3428	1	Mdfic
NM_001290995	NM_001290995	chr4	149176319	149307733	-	10223	1	Kif1b
NM_001145832	NM_001145832	chr8	95099828	95113342	-	2907	1	Kifc3
NM_008479	NM_008479	chr6	124904359	124911705	-	1993	1	Lag3
NM_011029	NM_011029	chr9	120127766	120132369	+	1852	1	Rpsa
NM_010699	NM_010699	chr7	46845804	46855627	+	1613	1	Ldha
NM_010701	NM_010701	chr14	79637693	79662183	-	1437	1	Lect1
NM_010712	NM_010712	chr1	155701694	155742027	-	1843	1	Lhx4
NM_010722	NM_010722	chr10	80901363	80918245	-	3357	1	Lmnb2
NM_008507	NM_008507	chr5	121815481	121836859	-	4264	1	Sh2b3
NM_013586	NM_013586	chr6	83034224	83052564	+	4033	1	Loxl3
NM_008532	NM_008532	chr17	87635979	87651127	+	2049	1	Epcam
NM_010744	NM_010744	chr9	21507380	21510186	-	1481	1	Tmed1
NM_008545	NM_008545	chr2	121953771	121956092	-	2319	1	Mageb3
NM_010761	NM_010761	chr2	121008408	121016912	+	1559	1	Ccndbp1
NM_001110253	NM_001110253	chr9	123789500	123851899	-	7682	1	Fyco1
NM_008587	NM_008587	chr2	128698997	128802188	+	3534	1	Mertk
NM_021296	NM_021296	chr18	61712424	61726331	-	4040	1	Grpel2
NM_008636	NM_008636	chr4	124802549	124849800	+	7618	1	Mtf1
NM_008637	NM_008637	chr5	140331922	140338135	+	932	1	Nudt1
NM_001161824	NM_001161824	chr3	89209081	89214335	-	1509	1	Mtx1
NM_139063	NM_139063	chr13	38602706	38635109	-	1762	1	Bloc1s5
NM_144514	NM_144514	chr11	22899728	22982284	-	813	1	Commd1
NM_013606	NM_013606	chr16	97536083	97560899	+	2401	1	Mx2
NM_010865	NM_010865	chr1	162639150	162649694	+	2075	1	Myoc
NM_008669	NM_008669	chr15	82329532	82338826	-	1901	1	Naga
NM_010872	NM_010872	chr13	100144063	100202122	-	4835	1	Naip2
NM_010870	NM_010870	chr13	100211740	100247336	-	5275	1	Naip5
NM_001293637	NM_001293637	chr8	60993193	61131346	+	5582	1	Nek1
NM_010914	NM_010914	chr10	82748700	82764141	-	2542	1	Nfyb
NM_001081453	NM_001081453	chr12	70011435	70102854	-	9644	1	Nin
NM_008698	NM_008698	chr11	4874003	4894200	+	1862	1	Nipsnap1
NM_010921	NM_010921	chr14	69190692	69194658	+	3133	1	Nkx3-1
NM_008705	NM_008705	chr11	93949814	93956256	-	1002	1	Nme2
NM_020282	NM_020282	chr13	33964659	33988465	+	3964	1	Nqo2
NM_008721	NM_008721	chr2	25403050	25409494	+	1495	1	Npdc1
NM_010937	NM_010937	chr3	103058285	103067914	+	4461	1	Nras
NM_008743	NM_008743	chr17	24632682	24638838	+	1072	1	Nthl1
NM_008747	NM_008747	chr12	16653470	16660236	+	1541	1	Ntsr2
NM_001163662	NM_001163662	chr7	45492674	45510408	-	2624	1	Nucb1
NM_010948	NM_010948	chr4	133532542	133546027	-	1337	1	Nudc
NM_010950	NM_010950	chr7	27258761	27282150	+	2721	1	Numbl
NM_008753	NM_008753	chr10	80826656	80829290	+	1068	1	Oaz1
NM_010953	NM_010953	chr15	65876053	65912287	-	1782	1	Oc90
NM_008756	NM_008756	chr13	100497367	100552498	-	3181	1	Ocln
NM_011010	NM_011010	chr7	98143359	98145447	-	2086	1	Omp
NM_011020	NM_011020	chr3	40745613	40790365	+	3537	1	Hspa4l
NM_011025	NM_011025	chr2	130576169	130577053	+	535	1	Oxt
NM_011044	NM_011044	chr2	173153073	173159253	+	2604	1	Pck1
NM_008787	NM_008787	chr10	76351254	76442912	-	9486	1	Pcnt
NM_008788	NM_008788	chr5	137605107	137611404	-	1528	1	Pcolce
NM_001281934	NM_001281934	chr9	45906569	45929722	+	4059	1	Pcsk7
NM_011067	NM_011067	chr4	151003655	151044665	-	5973	1	Per3
NM_011069	NM_011069	chr3	96635430	96645381	+	2433	1	Pex11b
NM_008877	NM_008877	chr17	12378609	12419384	+	2734	1	Plg
NM_008889	NM_008889	chr19	6975048	6977324	+	913	1	Ppp1r14b
NM_213614	NM_213614	chr16	18621811	18629938	-	2113	1	2019-09-05
NM_011148	NM_011148	chr5	92226974	92253159	-	2257	1	Ppef2
NM_144828	NM_144828	chr11	98348406	98357796	+	1990	1	Ppp1r1b
NM_011172	NM_011172	chr16	18071726	18089190	-	2267	1	Prodh
NM_008939	NM_008939	chr3	123446913	123506602	+	2594	1	Prss12
NM_008943	NM_008943	chr12	83688563	83735199	+	3009	1	Psen1
NM_011188	NM_011188	chr5	21785283	21803784	+	1767	1	Psmc2
NM_008950	NM_008950	chr11	106256185	106263112	+	1264	1	Psmc5
NM_011192	NM_011192	chr11	101316251	101323530	+	2606	1	Psme3
NR_003368	NR_003368	chr15	62037986	62250976	+	3067	1	Pvt1
NM_001277805	NM_001277805	chr6	124396816	124415067	-	3167	1	Pex5
NM_011224	NM_011224	chr19	6384429	6398459	+	2822	1	Pygm
NM_029391	NM_029391	chr7	27168433	27178883	-	1160	1	Rab4b
NM_009004	NM_009004	chr18	34624936	34633277	+	3452	1	Kif20a
NR_028096	NR_028096	chr3	153907289	153912203	-	1565	1	Rabggtb
NR_102718	NR_102718	chr11	82873063	82890624	-	7085	1	Rad51d
NM_013833	NM_013833	chr18	65934639	65939089	-	1664	1	Rax
NM_011258	NM_011258	chr5	65261852	65335639	-	4693	1	Rfc1
NM_023042	NM_023042	chr6	142361376	142387087	-	3372	1	Recql
NM_023132	NM_023132	chrX	73922121	73930850	-	1405	1	Renbp
NM_009059	NM_009059	chr17	33929894	33937687	+	2920	1	Rgl2
NR_028056	NR_028056	chr3	88716854	88731048	+	2532	1	Rit1
NM_011272	NM_011272	chr19	29331755	29334670	-	693	1	Rln1
NM_001286865	NM_001286865	chr12	28649602	28659591	+	1447	1	Rnaseh1
NM_009070	NM_009070	chr17	24414675	24425897	+	1911	1	Rnps1
NM_011289	NM_011289	chr11	101442245	101445596	+	727	1	Rpl27
NM_011291	NM_011291	chr1	16101296	16104433	-	924	1	Rpl7
NM_011299	NM_011299	chr17	7170115	7303316	+	5384	1	Rps6ka2
NM_013648	NM_013648	chr7	19282624	19296164	+	1982	1	Rtn2
NM_176785	NM_176785	chr19	46003478	46006173	+	2693	1	Hps6
NM_001290481	NM_001290481	chr2	27709292	27763319	+	5076	1	Rxra
NM_016882	NM_016882	chr19	5377523	5388703	-	5069	1	Sart1
NM_009131	NM_009131	chr7	44303766	44306959	-	1950	1	Clec11a
NM_009141	NM_009141	chr5	90759298	90761625	+	1650	1	Cxcl5
NR_073549	NR_073549	chr3	95160420	95174050	+	4014	1	Sema6c
NM_001079695	NM_001079695	chr12	80945504	80950507	+	1643	1	Srsf5
NM_011743	NM_011743	chr2	120506830	120563831	-	9075	1	Zfp106
NM_011368	NM_011368	chr3	89418551	89430029	+	3141	1	Shc1
NM_009195	NM_009195	chr8	105943590	105966115	-	3800	1	Slc12a4
NM_148938	NM_148938	chr15	8634124	8710807	-	4194	1	Slc1a3
NM_015747	NM_015747	chr2	129198773	129211612	+	3290	1	Slc20a1
NM_001290703	NM_001290703	chrX	48623578	48662298	+	1851	1	Slc25a14
NM_016981	NM_016981	chr4	133369772	133423698	+	4592	1	Slc9a1
NM_011409	NM_011409	chr11	83191330	83215154	+	1811	1	Slfn3
NM_011418	NM_011418	chr10	75896769	75921614	-	1646	1	Smarcb1
NM_001252629	NM_001252629	chr13	100123205	100137698	+	1280	1	Smn1
NM_011427	NM_011427	chr2	167538227	167542811	+	1581	1	Snai1
NM_009227	NM_009227	chr1	133603871	133610280	-	485	1	Snrpe
NM_013673	NM_013673	chr1	85649988	85709997	+	2747	1	Sp100
NM_011456	NM_011456	chr13	33249610	33260846	+	1912	1	Serpinb9e
NM_011479	NM_011479	chr12	87305058	87388355	-	6696	1	Sptlc2
NM_009270	NM_009270	chr15	59315092	59331193	+	2735	1	Sqle
NM_011485	NM_011485	chr8	25808513	25815982	+	3998	1	Star
NM_016665	NM_016665	chr11	120710941	120713767	-	629	1	Stra13
NM_011499	NM_011499	chr6	137735082	137751930	+	2632	1	Strap
NM_011506	NM_011506	chr14	73552786	73596142	+	2095	1	Sucla2
NM_011516	NM_011516	chr3	102818499	102936100	-	3402	1	Sycp1
NM_013680	NM_013680	chrX	20860511	20920918	-	3198	1	Syn1
NM_009309	NM_009309	chr17	8434423	8442496	+	2036	1	T
NM_001040435	NM_001040435	chr5	33658128	33672202	+	2632	1	Tacc3
NM_021382	NM_021382	chr3	134829007	134934581	+	3757	1	Tacr3
NM_021441	NM_021441	chr8	119597974	119605240	-	3238	1	Taf1c
NM_009317	NM_009317	chr4	53779705	53786885	+	1140	1	Tal2
NM_011528	NM_011528	chr7	141392160	141402976	+	1266	1	Taldo1
NR_027799	NR_027799	chr15	82890483	82898461	-	7978	1	Tbrg3
NM_134011	NM_134011	chr11	6615598	6626067	-	3125	1	Tbrg4
NM_011532	NM_011532	chr16	18581704	18586969	-	1777	1	Tbx1
NM_033476	NM_033476	chr15	100502748	100552008	-	3283	1	Tfcp2
NM_009353	NM_009353	chr8	107069402	107096545	-	2652	1	Terf2
NM_011573	NM_011573	chr9	106658746	106685816	-	1881	1	Tex264
NM_009360	NM_009360	chr10	71225477	71238044	-	3909	1	Tfam
NM_009376	NM_009376	chr14	57424071	57517936	+	3051	1	Ift88
NM_199226	NM_199226	chr10	79576477	79587136	-	1168	1	Theg
NM_011609	NM_011609	chr6	125349723	125362483	+	2143	1	Tnfrsf1a
NM_001136259	NM_001136259	chr8	75033686	75070121	+	2340	1	Tom1
NM_011625	NM_011625	chr12	111828458	111908055	-	4314	1	Ppp1r13b
NM_009417	NM_009417	chr12	30054661	30132624	-	3278	1	Tpo
NM_011629	NM_011629	chr10	94147931	94197214	+	3811	1	Nr2c1
NM_011632	NM_011632	chr12	111166370	111267155	+	7146	1	Traf3
NM_009445	NM_009445	chr9	83834689	83872390	+	2880	1	Ttk
NM_011653	NM_011653	chr15	98949847	98953501	-	1585	1	Tuba1a
NM_178794	NM_178794	chrX	163950386	163958666	-	3928	1	Zrsr2
NM_001083937	NM_001083937	chrX	7884244	7894027	+	2407	1	Slc35a2
NM_013840	NM_013840	chrX	20951665	20961978	-	824	1	Uxt
NM_009497	NM_009497	chr11	69088528	69092381	+	2157	1	Vamp2
NM_009507	NM_009507	chr6	113624021	113631633	+	2725	1	Vhl
NM_011703	NM_011703	chr9	121642716	121672954	+	4887	1	Vipr1
NM_001164314	NM_001164314	chr12	108860030	108894174	-	2819	1	Wars
NM_021279	NM_021279	chr15	98789857	98793830	+	2365	1	Wnt1
NM_009526	NM_009526	chr1	74771892	74785319	+	2062	1	Wnt6
NM_023500	NM_023500	chrX	9272784	9313245	+	5038	1	Xk
NM_011729	NM_011729	chr1	44147744	44181260	+	3993	1	Ercc5
NM_011752	NM_011752	chr9	46273064	46282642	+	2967	1	Zpr1
NM_011758	NM_011758	chr11	58888153	58904225	-	3883	1	Zfp39
NM_011759	NM_011759	chr15	75616684	75625300	+	3738	1	Zfp41
NM_009561	NM_009561	chr7	24291046	24299549	-	2338	1	Zfp61
NM_001001130	NM_001001130	chr13	67747800	67755134	-	2212	1	Zfp85
NM_016684	NM_016684	chr13	21362820	21372302	+	4412	1	Zscan12
NM_009577	NM_009577	chr7	10487224	10495381	-	4185	1	Zik1
NM_009584	NM_009584	chr5	21757277	21785165	-	2018	1	Dnajc2
NM_011787	NM_011787	chr8	93971588	94012640	-	3662	1	Amfr
NM_011799	NM_011799	chr11	98908151	98923942	+	4594	1	Cdc6
NM_022011	NM_022011	chr13	100468577	100492609	-	1689	1	Gtf2h2
NM_011830	NM_011830	chr9	108560501	108565566	+	1609	1	Impdh2
NM_011846	NM_011846	chr5	129584214	129608211	+	3477	1	Mmp17
NM_011849	NM_011849	chr14	30951377	30988821	+	4228	1	Nek4
NM_015750	NM_015750	chr1	87594550	87597840	+	1578	1	Neu2
NM_011864	NM_011864	chr19	32620005	32667187	+	3620	1	Papss2
NM_011868	NM_011868	chr13	34977748	34994144	-	1598	1	Eci2
NM_011869	NM_011869	chr11	98704591	98729435	-	3382	1	Med24
NM_011884	NM_011884	chr4	33310311	33502614	+	4139	1	Rngtt
NM_011890	NM_011890	chr5	73632749	73647731	-	3719	1	Sgcb
NM_019710	NM_019710	chrX	152016428	152061973	+	3943	1	Smc1a
NM_011896	NM_011896	chr3	37639947	37644599	+	2488	1	Spry1
NR_028355	NR_028355	chr18	36667187	36670311	-	1083	1	Sra1
NM_020024	NM_020024	chr7	105742894	105744338	-	750	1	Taf10
NM_001039073	NM_001039073	chr14	34526699	34588681	-	4720	1	Ldb3
NM_001163797	NM_001163797	chr5	138603652	138619743	-	4717	1	Zfp68
NM_011933	NM_011933	chr17	26081211	26090164	-	2040	1	Decr2
NM_011941	NM_011941	chr2	119972699	120027403	+	6905	1	Mapkbp1
NM_011949	NM_011949	chr16	16983382	17047453	+	5088	1	Mapk1
NM_030595	NM_030595	chr3	55625198	56183701	-	10923	1	Nbea
NM_011959	NM_011959	chr5	22486489	22550331	-	2043	1	Orc5
NM_011960	NM_011960	chr14	32201971	32297549	+	4370	1	Parg
NM_011966	NM_011966	chr9	54950859	54958030	+	1085	1	Psma4
NM_011970	NM_011970	chr4	126677643	126709715	+	839	1	Psmb2
NM_011971	NM_011971	chr11	97703434	97713500	+	723	1	Psmb3
NM_011989	NM_011989	chr2	29802680	29817522	+	3993	1	Slc27a4
NM_020026	NM_020026	chr3	69573919	69598960	-	2262	1	B3galnt1
NM_012000	NM_012000	chr8	14888536	14901719	+	6426	1	Cln8
NM_012017	NM_012017	chr13	55105309	55135071	+	3588	1	Zfp346
NM_025297	NM_025297	chr4	131843471	131867787	+	1325	1	Mecr
NM_001253897	NM_001253897	chr9	22072246	22085427	-	1654	1	Ecsit
NM_012053	NM_012053	chr15	76904071	76906318	+	854	1	Rpl8
NM_012044	NM_012044	chr4	138877942	138882814	+	844	1	Pla2g2e
NM_018822	NM_018822	chr11	119343489	119355510	-	4314	1	Sgsh
NM_012055	NM_012055	chr6	7675171	7693182	-	1913	1	Asns
NM_019787	NM_019787	chr2	144556229	144590753	+	2788	1	Sec23b
NM_013717	NM_013717	chr11	61505172	61512927	+	776	1	B9d1
NM_031494	NM_031494	chrX	73342620	73359080	+	6369	1	Zfp275
NM_013719	NM_013719	chr2	118388617	118475234	+	5172	1	Eif2ak4
NM_013726	NM_013726	chr5	8396969	8422716	-	2430	1	Dbf4
NM_020494	NM_020494	chr12	103407976	103425867	-	2893	1	Ddx24
NM_013742	NM_013742	chr7	143557230	143600090	-	3197	1	Cars
NM_013767	NM_013767	chr15	79417852	79442057	-	2747	1	Csnk1e
NM_013788	NM_013788	chr7	62461871	62464510	-	2637	1	Peg12
NM_018795	NM_018795	chr7	45976380	46030286	-	4925	1	Abcc6
NM_145405	NM_145405	chrX	74365718	74368548	-	2311	1	Ubl4a
NM_033568	NM_033568	chr11	96034917	96047405	+	937	1	Snf8
NM_022408	NM_022408	chr16	17900709	17911348	-	2809	1	Dgcr14
NM_138584	NM_138584	chr9	65460937	65488470	+	2679	1	Spg21
NM_001025365	NM_001025365	chr4	147860778	147868719	-	1801	1	Miip
NM_178602	NM_178602	chr9	71478437	71485983	-	2242	1	Polr2m
NM_138591	NM_138591	chr3	67430115	67475068	+	2578	1	Gfm1
NM_145422	NM_145422	chr10	85938637	85957793	-	1965	1	Rtcb
NM_026579	NM_026579	chr10	83360221	83368835	+	3503	1	D10Wsu102e
NM_013868	NM_013868	chr4	141420779	141425310	+	2763	1	Hspb7
NM_013869	NM_013869	chr14	60963834	61046855	-	4627	1	Tnfrsf19
NM_013872	NM_013872	chr15	81951106	81960930	-	1292	1	Pmm1
NM_013883	NM_013883	chr4	120405281	120530199	+	3375	1	Scmh1
NM_013899	NM_013899	chr2	84827021	84830213	+	661	1	Timm10
NM_013900	NM_013900	chr16	31878810	31899019	+	4114	1	Mfi2
NM_013908	NM_013908	chr2	25500778	25505470	+	2348	1	Fbxw5
NM_013909	NM_013909	chr15	76535728	76538746	-	1703	1	Fbxl6
NM_001002846	NM_001002846	chr9	20637749	20644767	-	2092	1	Fbxl12
NM_013914	NM_013914	chr8	122454206	122460692	-	1584	1	Snai3
NM_144884	NM_144884	chr2	30960561	30967918	-	1445	1	Tor1a
NM_023141	NM_023141	chr1	156653617	156674339	-	3260	1	Tor3a
NM_001163447	NM_001163447	chr17	24897506	24936977	-	5542	1	Mapk8ip3
NM_001199016	NM_001199016	chr7	35449098	35466034	+	1687	1	Slc7a9
NM_001170419	NM_001170419	chr6	99711299	99726392	-	1320	1	Prok2
NM_015769	NM_015769	chr16	13109736	13152009	+	6690	1	Ercc4
NM_015772	NM_015772	chr14	52311177	52328670	-	5051	1	Sall2
NM_025305	NM_025305	chr11	115604151	115607624	+	1317	1	Mrps7
NM_015797	NM_015797	chr4	148145716	148151925	-	1947	1	Fbxo6
NM_001201569	NM_001201569	chr18	80734141	80934058	-	5400	1	Atp9b
NM_016694	NM_016694	chr17	10840384	12063360	+	3187	1	Park2
NM_019393	NM_019393	chr3	36552606	36565727	+	1603	1	Exosc9
NM_016671	NM_016671	chr8	84030286	84042575	-	2642	1	Il27ra
NR_027802	NR_027802	chr7	45367233	45367948	+	715	1	Mtag2
NM_016748	NM_016748	chr4	120539868	120570276	-	2684	1	Ctps
NM_175238	NM_175238	chr2	52072837	52122381	+	8464	1	Rif1
NR_027630	NR_027630	chr1	57955101	57969524	-	2640	1	Kctd18
NM_024204	NM_024204	chr19	34122549	34166041	-	1746	1	Ankrd22
NM_001033128	NM_001033128	chr19	4886882	4906627	-	5578	1	Bbs1
NM_023209	NM_023209	chr14	65805911	65817822	+	1636	1	Pbk
NM_026504	NM_026504	chr5	115279702	115296972	+	1992	1	Coq5
NM_029884	NM_029884	chr8	25944459	25976744	-	2659	1	Hgsnat
NM_026792	NM_026792	chr8	18846279	18884413	+	3819	1	Agpat5
NM_001162538	NM_001162538	chr3	145118589	145153915	+	2565	1	Odf2l
NM_026560	NM_026560	chr4	124918465	124936917	-	1614	1	Cdca8
NM_001080930	NM_001080930	chr8	109726451	109737739	-	7520	1	Atxn1l
NM_134046	NM_134046	chr12	4211672	4234294	-	4334	1	Cenpo
NM_023175	NM_023175	chr16	57156665	57167332	-	1274	1	Nit2
NM_172567	NM_172567	chr11	105126425	105141146	+	2608	1	Mettl2
NM_001293683	NM_001293683	chr10	72654846	72674964	+	1823	1	Zwint
NM_026559	NM_026559	chr11	72207554	72210487	+	1440	1	Txndc17
NM_025918	NM_025918	chr11	102684688	102697725	-	2300	1	Ccdc43
NM_029148	NM_029148	chr2	134594502	134644121	-	5137	1	Tmx4
NM_028043	NM_028043	chr1	39535802	39546877	+	3157	1	Cnot11
NM_001177780	NM_001177780	chrX	100777271	100818410	+	3318	1	Dlg3
NM_016783	NM_016783	chrX	36598193	36606079	+	1865	1	Pgrmc1
NM_016871	NM_016871	chr7	19701313	19715429	-	1556	1	Tomm40
NM_016804	NM_016804	chr2	74825812	74876748	+	1246	1	Mtx2
NM_016908	NM_016908	chr7	4539765	4546567	-	1740	1	Syt5
NM_016890	NM_016890	chr4	41714798	41723163	-	957	1	Dctn3
NM_017378	NM_017378	chr18	38267092	38284401	-	5581	1	Pcdh12
NM_016879	NM_016879	chr15	101431014	101491303	-	2016	1	Krt85
NM_145907	NM_145907	chrX	8193846	8206525	-	1866	1	Porcn
NM_017393	NM_017393	chr17	56990264	56996371	+	1199	1	Clpp
NM_001282072	NM_001282072	chr7	141297176	141327725	-	2347	1	Deaf1
NM_016861	NM_016861	chr19	40222239	40271616	-	1496	1	Pdlim1
NM_017407	NM_017407	chr11	78301591	78322454	+	3796	1	Spag5
NM_017470	NM_017470	chr15	79761449	79774467	-	1470	1	Dnal4
NM_019403	NM_019403	chr17	34601099	34603561	-	1093	1	Rnf5
NM_019419	NM_019419	chr7	118118890	118129625	-	2127	1	Arl6ip1
NM_018767	NM_018767	chr3	96798763	96814521	-	2506	1	Cd160
NM_019421	NM_019421	chr17	33843091	33849774	+	2202	1	Cd320
NM_019425	NM_019425	chr14	45376421	45388796	-	2528	1	Gnpnat1
NM_133183	NM_133183	chr7	3424662	3434940	+	778	1	Cacng6
NM_019437	NM_019437	chr19	17394043	17401349	+	2476	1	Rfk
NM_019443	NM_019443	chrX	37187589	37191238	-	488	1	Ndufa1
NM_018810	NM_018810	chr6	39397821	39420369	-	2926	1	Mkrn1
NM_138742	NM_138742	chrX	122394561	122397385	-	2822	1	Nap1l3
NM_001290574	NM_001290574	chrX	7558562	7574281	-	3486	1	Ppp1r3f
NM_019582	NM_019582	chrX	7607103	7635196	+	6025	1	Cacna1f
NM_018807	NM_018807	chr2	153227769	153241358	-	5402	1	Plagl2
NM_001285861	NM_001285861	chr7	142436834	142440396	+	1371	1	Syt8
NM_018739	NM_018739	chr9	22448312	22468356	-	1133	1	Rp9
NM_018831	NM_018831	chr19	56529161	56548222	-	4062	1	Dclre1a
NM_018796	NM_018796	chr1	63176831	63180486	+	1925	1	Eef1b2
NM_018866	NM_018866	chr5	95956939	95961068	+	1156	1	Cxcl13
NM_019489	NM_019489	chr4	123127125	123139941	-	1156	1	Ppie
NM_207678	NM_207678	chr4	155812489	155824543	+	2429	1	Ccnl2
NM_001291055	NM_001291055	chr13	12439402	12459316	-	2511	1	Lgals8
NM_019540	NM_019540	chr19	12427905	12432110	+	3914	1	Pfpl
NM_019518	NM_019518	chr15	101224207	101232756	+	2004	1	Grasp
NM_001026212	NM_001026212	chr3	95624980	95630493	+	2271	1	Ensa
NM_019584	NM_019584	chr11	101288267	101302267	-	2017	1	Becn1
NM_019571	NM_019571	chr3	138742208	138904433	+	3158	1	Tspan5
NM_207687	NM_207687	chr4	152120876	152152207	-	2844	1	Espn
NM_021299	NM_021299	chr19	29020832	29047902	-	2744	1	Ak3
NM_019832	NM_019832	chr13	58233351	58274188	-	1504	1	Gkap1
NM_026490	NM_026490	chr6	81957842	81965949	-	4993	1	Mrpl19
NM_001177965	NM_001177965	chrX	73916870	73921944	-	1046	1	Naa10
NM_019814	NM_019814	chr9	121848560	121858000	-	1867	1	Higd1a
NM_019826	NM_019826	chr2	118862000	118881357	+	2053	1	Ivd
NM_019736	NM_019736	chrX	155262443	155297654	+	1735	1	Acot9
NM_019735	NM_019735	chr2	103073675	103092649	+	915	1	Apip
NM_019694	NM_019694	chr5	33741352	33782704	-	3464	1	Letm1
NM_001168225	NM_001168225	chrX	136732948	136741155	-	1925	1	Morf4l2
NM_001146296	NM_001146296	chr3	89730718	89753455	+	5893	1	Adar
NM_019780	NM_019780	chr5	122354413	122363287	+	969	1	Vps29
NM_019750	NM_019750	chr9	107580170	107584048	+	1994	1	Nat6
NM_019817	NM_019817	chr15	103272918	103299864	+	1653	1	Copz1
NM_001163472	NM_001163472	chr15	82370527	82380260	-	2760	1	Cyp2d22
NM_019654	NM_019654	chr17	87107679	87137588	+	4392	1	Socs5
NM_019684	NM_019684	chrX	73774405	73778924	+	1963	1	Srpk3
NM_019685	NM_019685	chr6	88465423	88497566	+	1642	1	Ruvbl1
NM_019827	NM_019827	chr16	38089001	38246079	+	8285	1	Gsk3b
NM_019922	NM_019922	chr9	114375131	114390712	-	1705	1	Crtap
NM_020052	NM_020052	chr7	109798691	109865679	-	3538	1	Scube2
NM_021546	NM_021546	chr2	154544405	154558853	-	1795	1	Necab3
NM_020293	NM_020293	chr17	23682584	23684026	-	1440	1	Cldn9
NM_001039386	NM_001039386	chr2	25054379	25062881	+	2915	1	Nsmf
NM_020514	NM_020514	chr14	52450393	52451402	+	1007	1	Olfr1509
NM_020516	NM_020516	chr15	79251016	79254748	-	1783	1	Slc16a8
NM_020520	NM_020520	chr9	108662098	108684641	+	1772	1	Slc25a20
NM_020560	NM_020560	chr8	22411340	22429665	+	1527	1	Mrps31
NM_020603	NM_020603	chr17	33940723	33949695	+	2147	1	Wdr46
NM_020579	NM_020579	chr1	171270328	171276895	+	1988	1	B4galt3
NM_001291220	NM_001291220	chr7	78913424	78920396	+	1204	1	Isg20
NR_003522	NR_003522	chr5	30950066	30955095	+	1347	1	Abhd1
NM_021305	NM_021305	chr2	5870987	5895353	-	2355	1	Sec61a2
NM_021328	NM_021328	chr14	70100145	70138206	+	1716	1	Bin3
NM_021329	NM_021329	chr11	68972484	68973855	-	825	1	Rangrf
NM_021340	NM_021340	chr14	37034909	37049014	-	4281	1	Rgr
NM_178873	NM_178873	chr6	39573876	39588769	+	3529	1	Adck2
NM_020581	NM_020581	chr17	33774900	33781575	-	1894	1	Angptl4
NM_021429	NM_021429	chr12	8313433	8343824	+	2949	1	Hs1bp3
NM_021435	NM_021435	chr6	34155879	34177054	-	3685	1	Slc35b4
NM_025613	NM_025613	chr2	125673100	125675642	+	2540	1	Eid1
NM_021485	NM_021485	chr19	4156977	4163245	-	1475	1	Rps6kb2
NM_021499	NM_021499	chr4	154142372	154156818	+	1586	1	Wrap73
NM_021521	NM_021521	chrX	101274091	101298934	+	8400	1	Med12
NM_021525	NM_021525	chr19	29101375	29143843	+	1792	1	Rcl1
NM_021526	NM_021526	chr2	61711694	61800376	+	1527	1	Psmd14
NM_021531	NM_021531	chr9	21546894	21589465	+	3200	1	Carm1
NM_021534	NM_021534	chr2	154587044	154603673	-	1462	1	Pxmp4
NM_021537	NM_021537	chr1	93620751	93635727	-	3240	1	Stk25
NM_021564	NM_021564	chr16	22920222	22939768	+	1565	1	Fetub
NM_021713	NM_021713	chr15	102331709	102338138	+	1470	1	Myg1
NM_021789	NM_021789	chr9	44403759	44407548	-	1161	1	Trappc4
NM_021782	NM_021782	chr3	37222759	37232636	-	3083	1	Il21
NM_021888	NM_021888	chr9	21411837	21420279	+	1309	1	Qtrt1
NM_053081	NM_053081	chr4	43002337	43010301	-	2707	1	Fancg
NM_001163028	NM_001163028	chr8	117095865	117133720	+	2518	1	Bco1
NM_022030	NM_022030	chr3	96181227	96195180	+	3902	1	Sv2a
NM_022325	NM_022325	chr2	174427494	174439039	-	1432	1	Ctsz
NR_110957	NR_110957	chr2	26396249	26409219	-	4243	1	Inpp5e
NM_177475	NM_177475	chr10	76032612	76042969	+	4870	1	Zfp280b
NM_029550	NM_029550	chr19	12695790	12719896	+	1658	1	Keg1
NM_019752	NM_019752	chr6	83051267	83054571	-	1714	1	Htra2
NM_022985	NM_022985	chr7	84615054	84679351	-	1648	1	Zfand6
NM_001141922	NM_001141922	chr8	104170513	104219097	+	3382	1	Bean1
NM_001039126	NM_001039126	chr1	91540565	91559590	+	5964	1	Asb1
NM_023047	NM_023047	chr5	30711895	30799369	+	5006	1	Dpysl5
NM_023906	NM_023906	chr11	30954398	31102704	+	3213	1	Asb3
NM_001017433	NM_001017433	chr10	61171964	61188841	+	1516	1	Tbata
NM_025314	NM_025314	chr2	144599953	144768747	+	1275	1	Dtd1
NM_025321	NM_025321	chr1	171129157	171150603	-	1171	1	Sdhc
NM_001252444	NM_001252444	chr16	17086556	17111252	-	2304	1	Ppil2
NM_025323	NM_025323	chr12	4817608	4827659	+	1110	1	Sf3b6
NM_178374	NM_178374	chr9	56950924	56983199	+	1327	1	Snupn
NM_023154	NM_023154	chr7	24587543	24608926	+	1475	1	Ethe1
NM_025338	NM_025338	chr4	155831269	155833098	+	1203	1	Aurkaip1
NM_025339	NM_025339	chr9	123021326	123023491	+	1040	1	Tmem42
NM_025348	NM_025348	chr7	3617373	3620161	+	343	1	Ndufa3
NM_001190264	NM_001190264	chr13	100735940	100744659	-	704	1	Mrps36
NM_025370	NM_025370	chr13	64291836	64312710	-	964	1	Aaed1
NM_023162	NM_023162	chr17	36954358	36958428	-	680	1	Znrd1
NM_025377	NM_025377	chr11	87109261	87122974	+	1343	1	Ska2
NM_025384	NM_025384	chr14	77826217	77874917	-	640	1	Dnajc15
NM_025385	NM_025385	chr15	102459170	102462806	+	1222	1	Prr13
NM_025387	NM_025387	chr13	41016250	41022582	+	944	1	Tmem14c
NM_025390	NM_025390	chr7	38262820	38271348	-	1205	1	Pop4
NM_025392	NM_025392	chr7	133709333	133721145	+	1235	1	Bccip
NM_025397	NM_025397	chr11	70451931	70453726	+	884	1	Med11
NM_025409	NM_025409	chr18	76930027	76941614	+	1389	1	Ier3ip1
NM_025421	NM_025421	chr12	85272398	85280435	-	643	1	Acyp1
NM_023178	NM_023178	chr4	117674686	117682225	-	1500	1	Dmap1
NM_025436	NM_025436	chr8	64718145	64733578	-	1816	1	Msmo1
NM_024172	NM_024172	chr7	4660521	4684963	-	1478	1	Hspbp1
NM_025445	NM_025445	chr15	83299740	83350247	-	2600	1	Arfgap3
NM_133881	NM_133881	chr4	129105530	129111626	+	1101	1	Tmem54
NM_025454	NM_025454	chr1	93803965	93822100	+	4528	1	Ing5
NM_025473	NM_025473	chrX	74384720	74393274	-	1889	1	Fam3a
NM_001136270	NM_001136270	chr7	16272013	16273692	-	1677	1	Inafm1
NM_025479	NM_025479	chr13	17695413	17699105	+	2668	1	Mplkip
NM_025481	NM_025481	chr11	106820064	106920715	-	5310	1	Smurf2
NM_025482	NM_025482	chr2	181497142	181517962	+	3612	1	Tpd52l2
NM_025483	NM_025483	chr16	56075404	56190031	+	4882	1	Senp7
NM_001025375	NM_001025375	chr9	54717153	54734549	-	1318	1	Wdr61
NM_025486	NM_025486	chr8	105326364	105329057	+	767	1	Tmem208
NM_025495	NM_025495	chr13	49464059	49652731	-	1044	1	Cenpp
NM_001160209	NM_001160209	chr1	164289800	164307484	-	4005	1	Blzf1
NM_025512	NM_025512	chr3	10339956	10351301	-	1581	1	Zfand1
NM_025513	NM_025513	chr4	45316630	45320603	-	1028	1	Exosc3
NM_175107	NM_175107	chr7	27553290	27582098	+	2631	1	2310022A10Rik
NM_025529	NM_025529	chr19	4000580	4002102	+	780	1	Nudt8
NM_025539	NM_025539	chr4	41465148	41480926	+	843	1	Nudt2
NM_025554	NM_025554	chr10	80035953	80039659	-	999	1	Polr2e
NM_025558	NM_025558	chr8	107150661	107187470	+	4287	1	Cyb5b
NM_139291	NM_139291	chr4	62394589	62408623	-	788	1	Cdc26
NM_025567	NM_025567	chr15	76343523	76345934	+	1185	1	Cyc1
NM_025570	NM_025570	chr4	155803618	155808829	+	659	1	Mrpl20
NM_025576	NM_025576	chr2	90910713	90918050	-	1315	1	Ptpmt1
NM_025582	NM_025582	chr4	154896430	154899043	-	776	1	Fam213b
NM_023211	NM_023211	chr19	47083471	47090625	-	335	1	Usmg5
NM_025589	NM_025589	chr12	69182734	69184067	-	513	1	Rpl36al
NR_045798	NR_045798	chr13	64248700	64268145	+	1799	1	1810034E14Rik
NM_025607	NM_025607	chr6	72359714	72362381	-	1376	1	Rnf181
NM_025616	NM_025616	chr7	28305826	28312046	-	1166	1	Timm50
NM_025623	NM_025623	chr4	53011924	53022059	+	1499	1	Nipsnap3b
NM_025636	NM_025636	chr8	125734203	125748235	+	1148	1	Ntpcr
NM_025943	NM_025943	chr14	118875520	118925470	-	4876	1	Dzip1
NM_025647	NM_025647	chr4	114960613	114987228	-	1872	1	Cmpk1
NM_133679	NM_133679	chr16	91689322	91728802	-	1777	1	Cryzl1
NM_001286857	NM_001286857	chr3	88043106	88055994	+	2240	1	Gpatch4
NM_170592	NM_170592	chr2	30807977	30823014	+	1211	1	Ntmt1
NM_133680	NM_133680	chr13	65065030	65112982	-	3458	1	Hiatl1
NM_025679	NM_025679	chr3	102995740	103003914	+	2791	1	Sike1
NM_025689	NM_025689	chr9	109082496	109093363	+	2391	1	Ccdc51
NM_025693	NM_025693	chr16	21934327	21947552	-	1352	1	Tmem41a
NM_025735	NM_025735	chr2	155276364	155278073	+	1039	1	Map1lc3a
NM_025777	NM_025777	chr2	122298900	122302885	+	1584	1	Duoxa2
NM_001173547	NM_001173547	chrX	74282718	74290151	+	1821	1	Taz
NM_025811	NM_025811	chr19	56548261	56598846	+	3921	1	Nhlrc2
NM_024182	NM_024182	chr18	12128850	12157367	+	3646	1	Riok3
NM_025828	NM_025828	chr13	55343833	55362783	-	4305	1	Lman2
NR_028108	NR_028108	chr1	92637145	92641948	-	671	1	Myeov2
NM_025877	NM_025877	chr17	57043711	57059863	-	3350	1	Slc25a23
NM_028190	NM_028190	chr17	26252910	26285506	+	4965	1	Luc7l
NM_025891	NM_025891	chr5	24592622	24602002	-	1710	1	Smarcd3
NM_025894	NM_025894	chr11	107479528	107498036	+	1710	1	Psmd12
NM_025914	NM_025914	chr10	89711973	89732295	-	1690	1	Actr6
NM_025921	NM_025921	chrX	107782752	107816334	-	5831	1	2610002M06Rik
NM_025924	NM_025924	chr8	13785615	13798537	+	1390	1	Upf3a
NM_027349	NM_027349	chr12	83632234	83683123	+	4223	1	Rbm25
NM_024188	NM_024188	chr15	4026428	4155344	+	3463	1	Oxct1
NM_025938	NM_025938	chr14	8080313	8091846	+	2459	1	Rpp14
NM_025939	NM_025939	chr5	76951411	76967505	+	2367	1	Paics
NM_001164217	NM_001164217	chr2	156144153	156145794	+	461	1	Romo1
NM_025954	NM_025954	chr17	24470473	24471596	+	1028	1	Pgp
NR_040578	NR_040578	chr10	119413444	119426864	+	890	1	1700025F24Rik
NM_025968	NM_025968	chr4	58965590	58987078	-	2092	1	Ptgr1
NM_025970	NM_025970	chr4	129336026	129347029	+	651	1	Zbtb8os
NM_025972	NM_025972	chr5	92257660	92278181	-	2411	1	Naaa
NM_025988	NM_025988	chr11	103101688	103112199	+	2064	1	Acbd4
NM_175115	NM_175115	chr7	131388649	131410478	-	4384	1	Ikzf5
NM_025998	NM_025998	chr4	130530131	130574036	-	2543	1	Nkain1
NM_026010	NM_026010	chr7	100159277	100160931	+	1225	1	Lipt2
NM_145944	NM_145944	chr14	65837302	65866604	+	2216	1	Ccdc25
NM_023311	NM_023311	chr18	40204865	40219399	-	2321	1	Yipf5
NR_045040	NR_045040	chr5	23850597	23855033	+	1366	1	2700038G22Rik
NM_026028	NM_026028	chr6	120324322	120357469	-	2637	1	Ccdc77
NM_026031	NM_026031	chr4	124678764	124693554	-	943	1	Utp11l
NM_026041	NM_026041	chr1	186721087	186749358	-	1205	1	Rrp15
NM_026044	NM_026044	chr2	24962422	24973471	+	2941	1	Dph7
NM_026046	NM_026046	chr7	12803780	12818860	-	7927	1	Zfp329
NM_026061	NM_026061	chr19	44550254	44555415	-	634	1	Ndufb8
NM_024197	NM_024197	chr1	92439719	92473758	-	1197	1	Ndufa10
NM_026073	NM_026073	chr5	136908150	136913244	+	904	1	Ift22
NM_152807	NM_152807	chr11	120458129	120464353	+	2751	1	Ccdc137
NR_027974	NR_027974	chr13	119487257	119488384	-	1127	1	3110070M22Rik
NM_026094	NM_026094	chr10	80519585	80539124	-	4381	1	Atp8b3
NM_026126	NM_026126	chrX	75382399	75397158	+	3254	1	Fundc2
NM_026140	NM_026140	chr7	122034162	122067086	-	6517	1	Ears2
NM_026165	NM_026165	chr18	31580168	31609902	-	4361	1	Slc25a46
NM_026175	NM_026175	chr11	4160354	4182541	+	4898	1	Sf3a1
NM_001286005	NM_001286005	chr17	84676302	84700333	+	3401	1	Abcg8
NM_026181	NM_026181	chr7	35276544	35318440	-	3035	1	Gpatch1
NM_026197	NM_026197	chr11	74770863	74818692	+	2706	1	Mettl16
NM_026210	NM_026210	chr11	62879490	62895184	+	1739	1	Tvp23b
NM_178110	NM_178110	chr4	128884140	128911326	+	3191	1	Trim62
NM_001014974	NM_001014974	chr1	74661754	74697973	+	4231	1	Ttll4
NR_033586	NR_033586	chr17	15396202	15433581	+	5820	1	Fam120b
NM_026232	NM_026232	chr14	75761999	75787037	-	1694	1	Slc25a30
NM_026238	NM_026238	chr17	25773776	25783332	+	2542	1	Narfl
NM_026253	NM_026253	chr14	32991382	33015292	+	2582	1	Lrrc18
NM_026255	NM_026255	chr6	94500314	94604652	+	1907	1	Slc25a26
NM_001163628	NM_001163628	chr6	145211134	145216542	+	1618	1	Lyrm5
NM_001042499	NM_001042499	chr16	37539894	37572385	+	2012	1	Rabl3
NM_026302	NM_026302	chr18	60526221	60558762	+	3699	1	Dctn4
NM_001163725	NM_001163725	chr9	72958785	72973067	+	1609	1	Dyx1c1
NM_026318	NM_026318	chr2	121457088	121458440	+	598	1	Hypk
NR_015524	NR_015524	chr10	94673493	94688613	-	4132	1	Cep83os
NM_026340	NM_026340	chr15	34495311	34530653	+	3285	1	Pop1
NM_026344	NM_026344	chr4	117888643	117892003	-	2518	1	Dph2
NM_026362	NM_026362	chr19	29348677	29361871	-	835	1	Plgrkt
NM_026365	NM_026365	chr6	113442569	113448229	+	1197	1	Jagn1
NM_026388	NM_026388	chr4	154157485	154160684	-	1736	1	Tprgl
NM_001033136	NM_001033136	chr2	119136998	119157034	-	2237	1	Rmdn3
NM_026396	NM_026396	chr15	10474779	10485937	-	2642	1	Brix1
NM_026399	NM_026399	chr8	85075035	85080746	-	1227	1	Wdr83
NM_026410	NM_026410	chr19	6085097	6091773	+	1898	1	Cdca5
NM_172398	NM_172398	chr6	34384247	34396949	+	1329	1	Akr1b10
NM_026421	NM_026421	chr5	100039994	100068765	+	1821	1	Enoph1
NM_026425	NM_026425	chr2	145903241	145916425	+	1164	1	Naa20
NM_026432	NM_026432	chr8	34154563	34170847	+	1891	1	Saraf
NM_026437	NM_026437	chr19	60811570	60836229	+	2339	1	Fam45a
NM_001083882	NM_001083882	chr17	14943184	14945939	+	2753	1	1600012H06Rik
NM_026452	NM_026452	chr8	94838417	94854895	+	1682	1	Coq9
NM_026455	NM_026455	chr8	72219730	72223775	+	1915	1	Fam32a
NM_001163454	NM_001163454	chr11	29511757	29515033	-	2123	1	Prorsd1
NM_026467	NM_026467	chr9	66946076	66949522	+	513	1	Rps27l
NM_026472	NM_026472	chr1	118321843	118333831	+	1885	1	Nifk
NM_026474	NM_026474	chr14	79587691	79629755	+	1936	1	Sugt1
NM_026483	NM_026483	chr7	64376541	64392236	-	2189	1	Mphosph10
NM_001038015	NM_001038015	chr5	69575002	69592285	-	1829	1	Gnpda2
NM_001037098	NM_001037098	chr2	26055536	26092396	-	6885	1	Nacc2
NM_026506	NM_026506	chr6	86371540	86378902	+	387	1	Snrpg
NM_026511	NM_026511	chr12	111713269	111734224	+	1054	1	Apopt1
NM_026512	NM_026512	chr13	34037641	34074074	+	1200	1	Bphl
NM_026526	NM_026526	chr14	57549598	57571569	-	829	1	N6amt2
NM_026528	NM_026528	chr14	19811402	19823823	-	1500	1	2700060E02Rik
NM_026529	NM_026529	chr18	24470871	24477767	+	1025	1	2700062C07Rik
NM_026531	NM_026531	chr7	78895927	78908833	+	2574	1	Aen
NM_026533	NM_026533	chr7	116331507	116334190	-	574	1	Rps13
NM_026534	NM_026534	chr4	6191105	6219788	+	4725	1	Ubxn2b
NM_026550	NM_026550	chr13	41001010	41013033	+	1741	1	Pak1ip1
NM_026551	NM_026551	chr11	102994056	103017147	-	1707	1	Dcakd
NM_026553	NM_026553	chr19	5088538	5092879	+	1483	1	Yif1a
NM_001080935	NM_001080935	chr11	97840780	97843043	+	1184	1	B230217C12Rik
NM_026578	NM_026578	chr3	129824912	129831396	-	1262	1	Gar1
NM_026598	NM_026598	chr14	61339763	61360445	-	2071	1	Ebpl
NM_024220	NM_024220	chr7	97400003	97407800	+	676	1	Ndufc2
NM_001024474	NM_001024474	chr13	52504375	52530836	-	4344	1	Diras2
NM_026623	NM_026623	chr8	94019403	94037039	-	1102	1	Nudt21
NM_001167831	NM_001167831	chr19	7373222	7383026	-	1587	1	AI846148
NM_026630	NM_026630	chr2	163087031	163089601	-	876	1	Gtsf1l
NM_026633	NM_026633	chr17	25863698	25868738	-	809	1	Fam195a
NM_024221	NM_024221	chr14	8165991	8172992	-	1473	1	Pdhb
NM_197982	NM_197982	chr8	83715177	83723351	+	1646	1	Ddx39
NM_146171	NM_146171	chr6	125168007	125191586	-	4480	1	Ncapd2
NM_024223	NM_024223	chr12	113140236	113145506	+	1430	1	Crip2
NM_178848	NM_178848	chr13	43370716	43395203	+	1352	1	Sirt5
NM_026688	NM_026688	chr2	90894636	90904721	-	931	1	Ndufs3
NM_026696	NM_026696	chr6	72347317	72353160	+	4628	1	0610030E20Rik
NM_026718	NM_026718	chr5	114775140	114805820	+	3235	1	Ankrd13a
NM_026719	NM_026719	chr1	24678544	24766301	+	5374	1	Lmbrd1
NM_026725	NM_026725	chr1	172630769	172632974	-	1413	1	Dusp23
NM_178376	NM_178376	chr4	86575673	86577283	+	1608	1	Rraga
NM_001013013	NM_001013013	chr11	67798271	67816002	+	1115	1	Dhrs7c
NM_026735	NM_026735	chr5	88720871	88758455	+	3163	1	Mob1b
NM_023464	NM_023464	chr2	25271039	25272418	-	859	1	Ssna1
NM_026744	NM_026744	chr6	83109108	83109932	+	615	1	Mrpl53
NM_001163416	NM_001163416	chr17	25120760	25125268	+	1487	1	Ptx4
NM_001134646	NM_001134646	chr4	45105210	45108113	-	681	1	Tomm5
NM_028643	NM_028643	chr14	57916280	57999262	-	2296	1	Micu2
NM_026751	NM_026751	chr11	120646031	120648337	-	2304	1	Myadml2
NM_026758	NM_026758	chr8	117791645	117801929	-	1047	1	Mphosph6
NM_001177403	NM_001177403	chr17	78916499	78921048	+	1506	1	Cebpzos
NM_026779	NM_026779	chr18	24653691	24701556	+	2867	1	Mocos
NM_024227	NM_024227	chr17	26123503	26126613	+	1058	1	Mrpl28
NM_026785	NM_026785	chr2	164769929	164772902	+	923	1	Ube2c
NM_178614	NM_178614	chr15	84192233	84214303	+	1656	1	Samm50
NM_175130	NM_175130	chr7	45303155	45333780	-	4218	1	Trpm4
NM_024229	NM_024229	chr11	120610087	120617890	-	1819	1	Pcyt2
NR_040713	NR_040713	chr9	64049829	64054100	+	774	1	1110036E04Rik
NM_178111	NM_178111	chr2	155381856	155389847	+	3928	1	Trp53inp2
NM_199197	NM_199197	chr18	80192264	80200619	-	1331	1	Rbfa
NM_001037742	NM_001037742	chr1	57388244	57406674	-	1403	1	Tyw5
NM_144524	NM_144524	chr12	86700502	86726460	-	3838	1	Angel1
NR_040707	NR_040707	chr13	33936032	33960181	+	772	1	1110046J04Rik
NM_001159906	NM_001159906	chr1	75168646	75171626	+	1188	1	Zfand2b
NM_001080932	NM_001080932	chr11	121259987	121309896	+	5021	1	Foxk2
NM_175134	NM_175134	chr15	36477668	36496791	-	2473	1	Ankrd46
NM_133701	NM_133701	chr2	181601319	181655661	+	3032	1	Prpf6
NM_001039483	NM_001039483	chr1	167308670	167333978	+	4465	1	Tmco1
NM_026888	NM_026888	chr7	127573348	127583307	+	1614	1	Phkg2
NR_045821	NR_045821	chr5	138264045	138266661	+	738	1	6330418K02Rik
NM_026908	NM_026908	chr14	59440981	59548903	+	3024	1	Cab39l
NM_001081065	NM_001081065	chr15	75969185	75975865	+	1810	1	Zfp707
NM_026912	NM_026912	chr19	6119404	6128215	-	1531	1	Snx15
NM_026932	NM_026932	chr4	118620799	118627776	+	2949	1	Ebna1bp2
NM_178616	NM_178616	chr11	80428615	80472133	+	1728	1	Psmd11
NM_133708	NM_133708	chr1	75435943	75443176	+	1513	1	Gmppa
NM_026938	NM_026938	chr7	16452779	16455490	+	810	1	Tmem160
NM_027314	NM_027314	chr19	37207545	37224457	+	4105	1	March5
NM_197989	NM_197989	chr11	78750506	78751729	-	1221	1	Fam58b
NM_026944	NM_026944	chr2	93980634	94010730	-	1219	1	Alkbh3
NR_040417	NR_040417	chr15	89071198	89075854	-	650	1	1810021B22Rik
NM_026967	NM_026967	chr15	98877760	98881414	-	1203	1	Rhebl1
NM_026982	NM_026982	chr11	69838525	69839558	+	425	1	Tmem256
NM_024462	NM_024462	chr4	119195310	119201298	+	724	1	Svbp
NM_026999	NM_026999	chr7	127418966	127422034	-	1011	1	Zfp688
NM_027016	NM_027016	chr3	30792876	30821263	+	3956	1	Sec62
NR_027980	NR_027980	chr15	83353847	83367297	-	5999	1	1700001L05Rik
NR_038077	NR_038077	chr14	66295329	66297129	-	766	1	1700001G11Rik
NM_027041	NM_027041	chr4	34711332	34730206	-	1703	1	Cfap206
NM_027084	NM_027084	chr1	87183314	87188405	+	2164	1	Prss56
NM_001033149	NM_001033149	chr12	81631249	81667557	+	4773	1	Ttc9
NM_027094	NM_027094	chr14	41072911	41092197	+	985	1	Dydc1
NM_001164578	NM_001164578	chrX	151087094	151096543	-	3798	1	Tsr2
NM_027102	NM_027102	chr9	37528089	37538319	+	1845	1	Esam
NM_027106	NM_027106	chr19	42123275	42128993	-	971	1	Avpi1
NM_027134	NM_027134	chr9	65435782	65453054	+	2031	1	Mtfmt
NM_001289438	NM_001289438	chr15	98517658	98534269	-	3681	1	Kansl2
NM_029556	NM_029556	chr14	122181694	122402234	+	1231	1	Clybl
NM_027152	NM_027152	chr4	133220809	133224554	+	978	1	Cd164l2
NM_027156	NM_027156	chr5	110653451	110660496	+	4829	1	Ddx51
NR_045757	NR_045757	chr15	38549344	38594934	-	618	1	2310043O21Rik
NM_027175	NM_027175	chr2	119655451	119662798	-	1444	1	Ndufaf1
NM_023526	NM_023526	chr14	18271136	18284000	+	4589	1	Nkiras1
NM_027194	NM_027194	chr8	25017211	25023260	+	1275	1	Tm2d2
NR_073433	NR_073433	chr5	45668701	45669708	-	1007	1	1600023N17Rik
NM_027213	NM_027213	chr12	81573564	81594958	-	994	1	Med6
NR_036588	NR_036588	chr8	103343878	103347534	-	486	1	1600027J07Rik
NM_023529	NM_023529	chr19	10962295	10974670	-	998	1	Ms4a10
NM_053085	NM_053085	chr5	30968677	30977018	+	4096	1	Tcf23
NM_172402	NM_172402	chr15	39094191	39112716	-	2936	1	Slc25a32
NM_027266	NM_027266	chr4	45297168	45316131	+	2012	1	Trmt10b
NM_001289764	NM_001289764	chr5	77205107	77211259	-	547	1	Spink2
NM_027294	NM_027294	chr9	114789345	114844152	-	1058	1	Cmtm8
NR_015531	NR_015531	chr5	74093083	74094336	+	1034	1	Dancr
NM_027303	NM_027303	chr2	173568661	173578341	-	1060	1	Ankrd60
NM_027308	NM_027308	chr7	19937305	19950743	-	1888	1	Igsf23
NM_001256493	NM_001256493	chr17	21879570	21909926	-	2214	1	2210404O09Rik
NR_045498	NR_045498	chr13	98424110	98435065	-	1183	1	2310005E17Rik
NM_058212	NM_058212	chr12	83269011	83487736	-	1502	1	Dpf3
NM_027334	NM_027334	chr15	100304817	100314348	+	1879	1	Mettl7a1
NR_045360	NR_045360	chr18	57632079	57638585	-	455	1	2210409D07Rik
NM_027338	NM_027338	chr8	22192860	22218597	+	1261	1	Vps36
NM_027346	NM_027346	chr11	106066107	106073612	+	1330	1	Taco1
NM_001166416	NM_001166416	chr10	24869986	24913529	+	4914	1	Med23
NR_015508	NR_015508	chrX	103493558	103506425	+	3799	1	Jpx
NM_027375	NM_027375	chr10	58255526	58305592	+	6486	1	Gcc2
NM_139292	NM_139292	chr10	80330145	80336441	+	2008	1	Reep6
NR_028286	NR_028286	chr2	132490728	132524057	+	843	1	1700026D11Rik
NM_027405	NM_027405	chr12	86241878	86291368	+	3907	1	Gpatch2l
NM_027411	NM_027411	chr11	34809185	34833641	-	2496	1	Spdl1
NM_133727	NM_133727	chr7	16119876	16127516	+	1635	1	Kptn
NM_024239	NM_024239	chr6	83543206	83572504	-	2145	1	Stambp
NM_027462	NM_027462	chr3	99141090	99220203	+	4380	1	Wars2
NM_027480	NM_027480	chr10	81628540	81647612	+	3636	1	Ankrd24
NM_023585	NM_023585	chr16	15550986	15594518	-	5886	1	Ube2v2
NM_172405	NM_172405	chr5	100804802	100820935	-	2488	1	Fam175a
NM_023587	NM_023587	chr16	35022421	35109175	+	3594	1	Hacd2
NM_001289527	NM_001289527	chr5	3689999	3803124	-	6622	1	Ankib1
NM_001025156	NM_001025156	chr1	121431067	121506460	+	7230	1	Ccdc93
NR_038162	NR_038162	chr2	14070333	14073934	-	798	1	Stamos
NM_027654	NM_027654	chr19	47033617	47050906	-	2149	1	Pcgf6
NR_029438	NR_029438	chr7	114354640	114415161	-	1040	1	4933406I18Rik
NM_027655	NM_027655	chr8	105708303	105710168	+	1118	1	4933405L10Rik
NR_045508	NR_045508	chr13	117706764	117720011	-	917	1	4933413L06Rik
NM_027687	NM_027687	chr18	12741355	12755142	+	2117	1	Cabyr
NM_027698	NM_027698	chr7	119783826	119794058	-	3558	1	Eri2
NM_001077713	NM_001077713	chr6	6956018	7039220	+	546	1	Sdhaf3
NM_027749	NM_027749	chr6	53873279	53978673	-	1693	1	Cpvl
NR_033641	NR_033641	chr8	92326031	92356120	-	1238	1	Crnde
NM_027782	NM_027782	chr14	8214081	8223569	+	1710	1	Kctd6
NR_045276	NR_045276	chr11	3452483	3458342	+	1836	1	8430429K09Rik
NM_001081490	NM_001081490	chr9	78081500	78109065	-	1837	1	Fbxo9
NM_027859	NM_027859	chr11	4135160	4141192	+	1925	1	Rnf215
NM_027865	NM_027865	chr9	44793779	44799216	-	2343	1	Tmem25
NM_027872	NM_027872	chr5	147878441	147894802	-	2413	1	Slc46a3
NM_027873	NM_027873	chr4	148434497	148444751	-	2966	1	Ubiad1
NM_001163579	NM_001163579	chr3	14533788	14568303	+	5654	1	Lrrcc1
NM_027895	NM_027895	chr9	57589452	57596233	+	2808	1	Ulk3
NM_001033162	NM_001033162	chr1	153425209	153452574	+	2033	1	Shcbp1l
NM_170591	NM_170591	chr14	60219468	60251378	-	2377	1	Nupl1
NM_027985	NM_027985	chr4	148140490	148145704	+	1222	1	Mad2l2
NM_027986	NM_027986	chr14	59563945	59597959	-	2236	1	Cdadc1
NM_027988	NM_027988	chr17	24696234	24700529	+	2227	1	Noxo1
NM_028002	NM_028002	chr12	31640055	31654826	-	1759	1	Dus4l
NM_024248	NM_024248	chr8	11514017	11550771	-	1833	1	Cars2
NM_183088	NM_183088	chr5	129895723	129903622	+	2485	1	Zbed5
NM_028050	NM_028050	chr7	141210043	141214080	-	2032	1	Lmntd2
NM_001081320	NM_001081320	chr3	108195771	108200834	-	4186	1	Cyb561d1
NM_028064	NM_028064	chr15	76612383	76616852	-	2212	1	Slc39a4
NM_023644	NM_023644	chr3	35959306	36000678	-	2961	1	Mccc1
NM_028070	NM_028070	chr5	136138781	136141614	+	1708	1	Alkbh4
NM_028096	NM_028096	chr1	37611676	37719811	-	4349	1	2010300C02Rik
NM_028099	NM_028099	chr6	85942269	85961667	-	6423	1	Dusp11
NM_028102	NM_028102	chr8	25725324	25754280	-	4247	1	Ddhd2
NM_028105	NM_028105	chr12	88360782	88461726	+	2301	1	Adck1
NM_028106	NM_028106	chr13	95324825	95337842	+	2303	1	Zbed3
NM_028116	NM_028116	chr9	72925650	72946015	+	1740	1	Pygo1
NM_153780	NM_153780	chr8	129216354	129234046	-	1769	1	2610044O15Rik8
NM_001252448	NM_001252448	chr11	106162974	106193603	-	2528	1	Strada
NM_028128	NM_028128	chr5	117379145	117389023	-	1717	1	Rfc5
NM_028141	NM_028141	chr2	127575533	127584677	-	2981	1	Zfp661
NM_028150	NM_028150	chr5	31514569	31526762	-	2670	1	Supt7l
NM_028151	NM_028151	chr13	112867780	112927380	-	3280	1	Skiv2l2
NR_040460	NR_040460	chr1	80445932	80475660	+	391	1	1700016L21Rik
NM_024413	NM_024413	chr7	38220654	38227994	-	1555	1	Plekhf1
NM_028193	NM_028193	chr12	112959862	113000621	-	2735	1	Brf1
NM_133346	NM_133346	chr2	30823098	30828300	-	2105	1	Asb6
NM_028208	NM_028208	chr19	23687400	23721129	+	2055	1	Ptar1
NM_028209	NM_028209	chr4	106661808	106678944	-	2557	1	Ttc4
NM_028211	NM_028211	chr5	114942202	114948540	+	1312	1	2210016L21Rik
NM_028222	NM_028222	chr14	46760541	46771525	+	763	1	Cdkn3
NM_024254	NM_024254	chr2	112379211	112414237	+	2871	1	Katnbl1
NM_133744	NM_133744	chr9	108460518	108465945	+	3104	1	Ccdc71
NM_028250	NM_028250	chr1	155558120	155687233	+	1487	1	Acbd6
NM_026047	NM_026047	chr14	104477534	104522666	-	3448	1	Rnf219
NM_028283	NM_028283	chr9	60794548	60880370	+	4407	1	Uaca
NM_028287	NM_028287	chr10	33926936	33951212	-	2352	1	Zufsp
NM_028292	NM_028292	chr7	100326737	100371896	-	2345	1	Ppme1
NM_028300	NM_028300	chr9	50617321	50625000	+	1251	1	Pih1d2
NM_001159595	NM_001159595	chr4	11202928	11254259	-	4647	1	Ints8
NM_001146024	NM_001146024	chr7	6172513	6193104	+	4324	1	Zfp444
NM_144802	NM_144802	chr17	80029487	80062268	-	3035	1	Hnrnpll
NM_028335	NM_028335	chr6	118427319	118455506	-	3653	1	Zfp248
NM_023685	NM_023685	chr13	21387004	21402755	-	2591	1	Zkscan3
NM_028365	NM_028365	chr12	110850279	110869998	+	3715	1	Zfp839
NM_001080941	NM_001080941	chr13	67389328	67399767	-	2026	1	Zfp429
NM_028369	NM_028369	chr9	107888129	107903139	+	2087	1	Mon1a
NM_182839	NM_182839	chr13	74009419	74035753	+	5084	1	Tppp
NM_028419	NM_028419	chr12	105032618	105040911	+	998	1	Glrx5
NM_028439	NM_028439	chr1	120121187	120188189	+	488	1	3110009E18Rik
NM_001081056	NM_001081056	chr10	121587380	121626316	-	5962	1	Xpot
NM_001142745	NM_001142745	chr17	35899832	35910068	-	2029	1	Atat1
NR_045909	NR_045909	chr11	109845878	109848476	+	386	1	1700023C21Rik
NM_028484	NM_028484	chr16	3905798	3908689	-	1092	1	1700037C18Rik
NR_045178	NR_045178	chr11	11868123	11885321	+	1071	1	1700042O10Rik
NM_028525	NM_028525	chr14	64104323	64113751	+	1016	1	Prss52
NR_040526	NR_040526	chr6	35330846	35336829	+	425	1	1700065J11Rik
NM_028536	NM_028536	chr8	123840844	123860209	-	2667	1	Ccsap
NR_027956	NR_027956	chr11	105179021	105181433	-	2412	1	1700052K11Rik
NM_178387	NM_178387	chr5	73651380	73679484	+	1934	1	Spata18
NM_028607	NM_028607	chr19	44139247	44146446	-	890	1	Bloc1s2
NM_028617	NM_028617	chr8	71542930	71548026	+	1051	1	Mvb12a
NM_001170847	NM_001170847	chr19	53677306	53867080	+	6576	1	Rbm20
NM_198001	NM_198001	chr2	32379101	32381915	-	653	1	1110008P14Rik
NM_028636	NM_028636	chr9	57130777	57142210	+	3193	1	Man2c1
NM_030246	NM_030246	chr12	83520466	83541992	+	2069	1	Dcaf4
NM_028665	NM_028665	chr7	92584183	92637142	-	2768	1	Ankrd42
NM_028672	NM_028672	chr11	23013387	23023741	+	1931	1	Fam161a
NM_029610	NM_029610	chr7	119896292	119916756	+	1276	1	Lyrm1
NM_001163627	NM_001163627	chr13	92449620	92484031	-	1375	1	Fam151b
NM_001276340	NM_001276340	chr16	16312228	16359031	-	4055	1	Dnm1l
NM_028718	NM_028718	chr1	91494668	91529307	+	3483	1	Traf3ip1
NM_001159599	NM_001159599	chr4	152039321	152060038	+	3728	1	Nol9
NM_001271411	NM_001271411	chr15	82996736	83033397	-	3954	1	Nfam1
NM_001039184	NM_001039184	chr1	155844964	155973255	-	13267	1	Cep350
NM_024258	NM_024258	chr16	87454985	87483513	+	2899	1	Usp16
NM_001290449	NM_001290449	chr4	40970906	41013873	+	4864	1	Nfx1
NM_028805	NM_028805	chr8	95081201	95099874	+	3403	1	Katnb1
NM_028806	NM_028806	chr2	178141933	178338492	+	5085	1	Phactr3
NM_028833	NM_028833	chr5	140663505	140702378	-	4334	1	Iqce
NM_001293672	NM_001293672	chr3	146450467	146465848	+	2885	1	Ctbs
NM_028838	NM_028838	chr9	110951545	110984064	+	3644	1	Lrrc2
NM_001146701	NM_001146701	chr9	106499967	106502250	+	525	1	Iqcf1
NR_108037	NR_108037	chr15	77084398	77096314	+	1087	1	1700109K24Rik
NM_001159900	NM_001159900	chr5	77086986	77095267	-	1100	1	Hopx
NM_028868	NM_028868	chr18	74216212	74221491	+	2520	1	Cxxc1
NM_028873	NM_028873	chr10	128805676	128819446	+	4220	1	Dnajc14
NR_015503	NR_015503	chr19	12585868	12596566	-	1104	1	A330040F15Rik
NR_027913	NR_027913	chr11	69803669	69806038	+	2369	1	G630025P09Rik
NM_028943	NM_028943	chr3	131318986	131344923	-	5782	1	Sgms2
NM_028955	NM_028955	chr7	120982509	121014787	+	1873	1	4933427G17Rik
NM_148958	NM_148958	chr9	115067279	115232223	+	1860	1	Osbpl10
NM_028976	NM_028976	chr9	119925673	119937558	-	3472	1	Gorasp1
NM_029002	NM_029002	chr8	23153271	23158948	+	2231	1	Nkx6-3
NM_183106	NM_183106	chr2	94300766	94406689	-	4564	1	Ttc17
NM_029008	NM_029008	chr18	46850039	46905446	+	3197	1	Lvrn
NM_029017	NM_029017	chr3	32727497	32736755	-	863	1	Mrpl47
NM_029031	NM_029031	chr11	73199482	73224506	+	2772	1	Shpk
NM_001197041	NM_001197041	chr8	129045477	129065492	-	1298	1	Ccdc7a
NM_001276356	NM_001276356	chr6	108065045	108077127	+	1765	1	Setmar
NM_029075	NM_029075	chr10	12939983	12964259	-	2391	1	Stx11
NM_029091	NM_029091	chr17	46630631	46645144	-	2304	1	Klc4
NR_040613	NR_040613	chr2	155547040	155556930	-	625	1	Acss2os
NR_040323	NR_040323	chr2	104559459	104568230	+	885	1	Platr14
NM_029144	NM_029144	chr3	146646259	146651317	-	1010	1	4930503B20Rik
NR_073374	NR_073374	chr17	8293366	8311118	-	970	1	4930506C21Rik
NR_045735	NR_045735	chr9	72518250	72531858	-	1188	1	4930509E16Rik
NM_001162909	NM_001162909	chr17	17830975	17839071	+	1091	1	Spaca6
NM_001282024	NM_001282024	chr17	35972539	35979467	-	2024	1	Prr3
NM_133803	NM_133803	chr19	4907229	4928287	-	2663	1	Dpp3
NM_001098237	NM_001098237	chr19	8802530	8804854	+	2033	1	Zbtb3
NM_029249	NM_029249	chr10	88091398	88146941	-	3615	1	Parpbp
NM_023774	NM_023774	chrX	58911461	58920304	+	1568	1	4930550L24Rik
NR_040703	NR_040703	chr5	34118740	34135339	+	1071	1	4930557J02Rik
NM_029280	NM_029280	chr2	69871195	69885615	-	962	1	Mettl5
NM_027532	NM_027532	chr7	101896331	101899545	+	877	1	Anapc15
NM_029293	NM_029293	chr2	25573431	25574871	-	578	1	Phpt1
NM_029314	NM_029314	chr3	108537584	108544697	+	585	1	1700013F07Rik
NM_029337	NM_029337	chr5	110664373	110770717	-	10744	1	Ep400
NM_029348	NM_029348	chr11	69765912	69784026	+	7818	1	Zbtb4
NM_172422	NM_172422	chr1	63730625	63753385	+	3191	1	Fastkd2
NM_029366	NM_029366	chr8	70513396	70523180	-	1209	1	Kxd1
NR_045979	NR_045979	chr10	110801174	110896507	-	607	1	1700020G17Rik
NR_040568	NR_040568	chr16	59466872	59469238	-	382	1	1700022E09Rik
NM_030690	NM_030690	chr15	10568978	10713540	-	4880	1	Rai14
NR_040522	NR_040522	chr16	42796388	42875762	-	713	1	4932412D23Rik
NM_029430	NM_029430	chr15	10503947	10558668	-	1918	1	Ttc23l
NM_029431	NM_029431	chr3	94310132	94332532	+	1722	1	Them4
NM_027448	NM_027448	chr9	83393416	83441099	-	4225	1	Lca5
NM_001165989	NM_001165989	chr2	91546322	91620665	+	6532	1	Ckap5
NR_045381	NR_045381	chr18	32663642	32837287	-	1611	1	4930455D15Rik
NM_177077	NM_177077	chr6	84618486	85069513	-	5416	1	Exoc6b
NM_029529	NM_029529	chr10	19847917	19851459	-	2625	1	Slc35d3
NM_001081174	NM_001081174	chr4	141213956	141220114	+	943	1	Rsg1
NM_001289656	NM_001289656	chr6	34780432	34859459	+	5239	1	Agbl3
NM_001033174	NM_001033174	chr19	11965844	11994114	+	4571	1	Osbp
NM_029746	NM_029746	chr8	124520767	124552007	+	2804	1	Cog2
NM_023821	NM_023821	chr13	93040715	93144724	-	11833	1	Cmya5
NM_029631	NM_029631	chr9	106448640	106452918	+	1469	1	Abhd14b
NM_029632	NM_029632	chr17	36948355	36951792	-	1674	1	Ppp1r11
NR_037698	NR_037698	chr15	82256023	82260753	+	1550	1	1500009C09Rik
NM_023831	NM_023831	chr9	44773009	44792714	+	3323	1	Ift46
NR_040548	NR_040548	chr3	27154026	27157019	+	858	1	1700125G22Rik
NM_001033875	NM_001033875	chr4	141838240	141846359	-	947	1	Ctrc
NM_029723	NM_029723	chr2	59484653	59505020	+	567	1	Dapl1
NM_001081082	NM_001081082	chr1	87098002	87101606	-	2324	1	Alpi
NM_001282120	NM_001282120	chr11	29526397	29545447	+	3070	1	Mtif2
NM_175246	NM_175246	chr4	125066693	125074043	+	2319	1	Snip1
NM_001290759	NM_001290759	chr11	50131360	50172785	+	5222	1	Tbc1d9b
NM_029758	NM_029758	chr12	12262139	12376361	+	4833	1	Fam49a
NM_029767	NM_029767	chr7	3704041	3706897	+	696	1	Rps9
NM_001162911	NM_001162911	chr13	62516797	62558599	-	2229	1	Zfp934
NM_176838	NM_176838	chr8	106131183	106136974	-	2655	1	Esrp2
NM_001081378	NM_001081378	chr12	24974932	25059697	+	7368	1	Kidins220
NM_001135019	NM_001135019	chr9	20495069	20521419	-	6262	1	Zfp266
NM_029934	NM_029934	chr7	3677789	3693525	-	2870	1	Mboat7
NM_152825	NM_152825	chr4	21776270	21837872	+	5987	1	Usp45
NM_029939	NM_029939	chr9	21989871	22002634	-	2182	1	Ccdc151
NM_029949	NM_029949	chr4	83417744	83453340	+	1374	1	Snapc3
NR_029464	NR_029464	chr12	111941991	111944482	-	1726	1	5033406O09Rik
NR_040511	NR_040511	chr2	9883041	9889540	-	733	1	9230102O04Rik
NM_029992	NM_029992	chr5	114707779	114722327	+	2848	1	Tchp
NM_144543	NM_144543	chr9	26999677	27007334	+	953	1	Thyn1
NM_207633	NM_207633	chrX	98937781	98949020	+	5185	1	Yipf6
NM_145609	NM_145609	chr9	4383537	4386869	+	2733	1	Msantd4
NM_183131	NM_183131	chr7	126830474	126831496	-	469	1	4930451I11Rik
NM_030059	NM_030059	chr2	148768618	148771497	-	601	1	Cst11
NM_133778	NM_133778	chr16	20695057	20703036	+	2263	1	Fam131a
NR_040666	NR_040666	chr4	45234723	45243990	-	412	1	Frmpd1os
NM_175277	NM_175277	chr6	83349484	83358392	+	524	1	Bola3
NM_023900	NM_023900	chr10	80796099	80798626	-	1252	1	Plekhj1
NM_030185	NM_030185	chr5	52783055	52823571	+	5728	1	Zcchc4
NM_198101	NM_198101	chr8	69808687	69821870	+	3902	1	Gmip
NM_024283	NM_024283	chr1	43730602	43742564	+	882	1	1500015O10Rik
NM_001081068	NM_001081068	chr16	87376651	87432606	-	7705	1	Ltn1
NM_024286	NM_024286	chr10	45289305	45318450	+	1845	1	Popdc3
NM_023260	NM_023260	chr17	24895120	24896273	+	893	1	Mrps34
NM_024467	NM_024467	chr8	95326136	95331950	-	4103	1	Zfp319
NR_033173	NR_033173	chr5	3803181	3844515	+	6334	1	Krit1
NM_001277340	NM_001277340	chr12	55565205	55566896	+	1689	1	Aldoart2
NM_030248	NM_030248	chr11	96907425	96916514	-	2253	1	Cdk5rap3
NM_030257	NM_030257	chr13	81657806	81671890	+	3121	1	Lysmd3
NM_030564	NM_030564	chr5	122850188	122868945	+	1946	1	Rnf34
NM_019979	NM_019979	chr14	29968380	29975074	+	1011	1	Selk
NM_001199246	NM_001199246	chrX	150806421	150813703	-	2088	1	Maged2
NM_030702	NM_030702	chr11	69673110	69681970	-	2429	1	Senp3
NM_030614	NM_030614	chrX	105764477	105776532	+	3035	1	Fgf16
NM_030725	NM_030725	chr2	92915101	92956051	+	3743	1	Syt13
NM_030729	NM_030729	chr9	108808380	108818366	+	2855	1	Nckipsd
NM_030730	NM_030730	chr9	106688080	106789213	-	9302	1	Rad54l2
NM_133190	NM_133190	chr7	3394117	3415605	+	1375	1	Cacng8
NM_031255	NM_031255	chr7	19054687	19074447	+	2349	1	Rsph6a
NM_031406	NM_031406	chr5	137314558	137333582	-	3299	1	Slc12a9
NM_031842	NM_031842	chr15	99702287	99713995	+	3138	1	Smarcd1
NM_032004	NM_032004	chr8	69902215	69903518	+	1301	1	Tssk6
NM_032543	NM_032543	chr9	108051672	108079375	-	4273	1	Rnf123
NR_002142	NR_002142	chr14	50807447	50807771	-	324	1	Rpph1
NM_134102	NM_134102	chr16	38396117	38433145	-	1961	1	Pla1a
NM_033146	NM_033146	chr14	55581524	55585254	-	798	1	Emc9
NM_139141	NM_139141	chr13	21513221	21531114	-	8792	1	Zkscan8
NM_033581	NM_033581	chr18	37806410	37841872	+	4680	1	Pcdhgc3
NM_053119	NM_053119	chr7	140105723	140116423	-	1481	1	Echs1
NM_053156	NM_053156	chr12	28553756	28582483	-	1445	1	Allc
NM_153516	NM_153516	chr6	120836230	120892842	+	6924	1	Bcl2l13
NM_053159	NM_053159	chr9	105053268	105077476	+	1519	1	Mrpl3
NM_025606	NM_025606	chr19	11770415	11774946	+	1118	1	Mrpl16
NM_053164	NM_053164	chr19	45005014	45006442	-	1208	1	Mrpl43
NM_053169	NM_053169	chr11	62820253	62842948	+	3888	1	Trim16
NM_053172	NM_053172	chr5	104325329	104338611	+	1677	1	Mepe
NM_033374	NM_033374	chr11	34226821	34783905	-	6362	1	Dock2
NM_053178	NM_053178	chr9	54604997	54661885	-	2759	1	Acsbg1
NM_033572	NM_033572	chr5	134148058	134176767	-	2297	1	Wbscr16
NM_133787	NM_133787	chr3	69722055	69749046	+	1720	1	Nmd3
NM_178878	NM_178878	chr5	30118304	30154980	-	3813	1	Hadha
NM_139229	NM_139229	chr8	107048709	107056737	-	2097	1	Cog8
NM_133798	NM_133798	chr12	80463095	80498135	+	3312	1	Exd2
NM_173865	NM_173865	chr1	131828012	131848864	+	4648	1	Slc41a1
NM_001290700	NM_001290700	chr1	33801960	33814595	-	2071	1	Zfp451
NR_030669	NR_030669	chr1	191894072	191907527	-	4357	1	1700034H15Rik
NM_001123327	NM_001123327	chr2	104754793	104816696	-	8961	1	Qser1
NM_207206	NM_207206	chr2	112239841	112247111	+	1886	1	Lpcat4
NM_001253768	NM_001253768	chr3	146404642	146440137	+	3674	1	Ssx2ip
NR_102309	NR_102309	chr2	180099465	180104407	-	2618	1	Hrh3
NM_178888	NM_178888	chr2	32986366	33087204	-	3356	1	Garnl3
NM_133872	NM_133872	chr4	136550533	136602723	-	2994	1	Kdm1a
NM_001004141	NM_001004141	chr4	96294509	96348680	-	1923	1	Cyp2j11
NM_001197082	NM_001197082	chr4	132331919	132345750	-	2314	1	Rcc1
NM_145414	NM_145414	chr5	135369953	135376797	+	2230	1	Nsun5
NM_001033202	NM_001033202	chr5	114100333	114122924	+	2775	1	Usp30
NM_133913	NM_133913	chr5	24586750	24592486	+	3711	1	Chpf2
NM_133924	NM_133924	chr2	164786021	164792770	+	1515	1	Snx21
NM_133927	NM_133927	chr6	128409444	128424910	-	2285	1	Itfg2
NM_175312	NM_175312	chr6	13625675	13677966	-	4134	1	B630005N14Rik
NM_001033205	NM_001033205	chr7	24583838	24587641	-	2735	1	Zfp575
NM_182995	NM_182995	chr7	118712611	118737018	+	4990	1	Ccp110
NM_153419	NM_153419	chr7	45825223	45830789	-	1893	1	Grwd1
NM_001033206	NM_001033206	chr7	139248482	139267253	+	2330	1	Pwwp2b
NM_001007571	NM_001007571	chr8	84246235	84249761	-	656	1	D8Ertd738e
NM_198299	NM_198299	chr8	105703652	105708168	-	1267	1	Enkd1
NM_153168	NM_153168	chr9	123366940	123462664	+	3858	1	Lars2
NM_001033210	NM_001033210	chr9	95752642	95845279	-	3679	1	Pls1
NM_175325	NM_175325	chr9	59321966	59353508	-	2524	1	Bbs4
NM_133993	NM_133993	chr10	85871831	85889103	+	2562	1	Pwp1
NM_001003910	NM_001003910	chr10	86705811	86776843	+	4347	1	Ttc41
NM_001034895	NM_001034895	chr10	81233163	81252123	+	3321	1	Zfr2
NM_134021	NM_134021	chr11	96937816	96944019	-	2027	1	Pnpo
NM_213729	NM_213729	chr11	70688361	70700155	-	1209	1	Inca1
NM_001014981	NM_001014981	chr18	63708695	63989759	+	7078	1	Wdr7
NM_138595	NM_138595	chr19	30098441	30175441	-	3758	1	Gldc
NM_145126	NM_145126	chr3	106201491	106219479	-	1497	1	Chil4
NM_178645	NM_178645	chr11	76945656	76987389	+	2341	1	Blmh
NM_026772	NM_026772	chr19	5917556	5924816	-	1487	1	Cdc42ep2
NM_018855	NM_018855	chr8	123518835	123536650	+	1667	1	Gas8
NM_148952	NM_148952	chr8	105297663	105305370	+	1981	1	E2f4
NM_024233	NM_024233	chr9	48468514	48480611	-	1066	1	Rexo2
NM_134033	NM_134033	chr11	5528888	5542217	-	3394	1	Ccdc117
NM_134034	NM_134034	chr11	29172907	29220797	+	5090	1	Smek2
NM_177325	NM_177325	chr11	74898080	74909340	+	3368	1	Tsr1
NM_001142580	NM_001142580	chr12	87238875	87266286	-	2531	1	Vipas39
NM_023697	NM_023697	chr12	10390780	10395562	+	1468	1	Rdh14
NM_001168253	NM_001168253	chr15	76001092	76009498	-	4528	1	Fam83h
NM_178920	NM_178920	chr15	54571366	54602846	+	2769	1	Mal2
NM_001014976	NM_001014976	chr15	102296293	102324356	+	6597	1	Espl1
NR_027897	NR_027897	chr16	31947051	31948521	-	1470	1	0610012G03Rik
NM_134130	NM_134130	chr18	10644411	10706696	-	1876	1	Abhd3
NM_134136	NM_134136	chr18	62504059	62548743	-	4374	1	Fbxo38
NM_134139	NM_134139	chr19	8735839	8740624	+	1191	1	Wdr74
NM_178930	NM_178930	chr19	46152558	46286510	+	6359	1	Gbf1
NM_025462	NM_025462	chr16	20611601	20618869	+	979	1	Ece2
NM_001199212	NM_001199212	chrX	170672644	170678054	+	1181	1	Asmt
NM_001031808	NM_001031808	chr2	24972470	24975098	-	2419	1	Mrpl41
NM_172438	NM_172438	chr11	4895343	4928865	+	2213	1	Thoc5
NM_023223	NM_023223	chr4	118432901	118437343	-	1772	1	Cdc20
NM_001143834	NM_001143834	chr7	87584168	88135063	+	8511	1	Grm5
NM_028017	NM_028017	chr18	62977916	62999451	+	3469	1	Napg
NM_138745	NM_138745	chr12	76255232	76319820	+	3294	1	Mthfd1
NM_138607	NM_138607	chrX	74313033	74320149	+	1368	1	Fam50a
NM_175401	NM_175401	chr13	50417877	50433769	+	1773	1	Fbxw17
NM_024240	NM_024240	chr8	23226610	23237668	-	1354	1	Gins4
NM_001145875	NM_001145875	chr13	41763148	41847616	-	2510	1	Adtrp
NM_029787	NM_029787	chr15	83153501	83172208	-	2020	1	Cyb5r3
NM_025374	NM_025374	chr17	30592862	30612659	-	1931	1	Glo1
NM_024439	NM_024439	chr7	66079649	66089405	+	1183	1	Vimp
NM_026637	NM_026637	chr6	54985095	54992867	-	1356	1	Ggct
NM_025628	NM_025628	chr7	30616974	30626151	-	499	1	Cox6b1
NM_201607	NM_201607	chr8	70724064	70751176	+	3174	1	Pde4c
NM_009338	NM_009338	chr17	12943042	12960725	-	2065	1	Acat2
NM_145927	NM_145927	chr12	76837467	76921412	+	2546	1	Fntb
NM_026662	NM_026662	chrX	167346320	167382749	-	3692	1	Prps2
NR_075104	NR_075104	chr7	43444072	43457800	+	897	1	Etfb
NM_133199	NM_133199	chr11	106318593	106349390	-	6572	1	Scn4a
NM_001114597	NM_001114597	chr19	5707374	5726317	-	6385	1	Ehbp1l1
NM_053254	NM_053254	chr10	81590905	81600900	-	1999	1	Tle6
NR_001462	NR_001462	chr17	35064437	35065596	+	1159	1	G6bos
NM_001164259	NM_001164259	chr5	108694229	108706950	+	2375	1	Fgfrl1
NM_054085	NM_054085	chr7	81057600	81105612	+	6353	1	Alpk3
NM_027773	NM_027773	chr11	76202056	76208257	+	923	1	Fam57a
NM_054093	NM_054093	chr5	114380607	114421166	+	5161	1	Ube3b
NM_080444	NM_080444	chr5	24532697	24540457	-	2319	1	Asb10
NM_080445	NM_080445	chr4	155989466	155992678	-	3210	1	B3galt6
NM_080452	NM_080452	chr2	28468066	28471177	+	2073	1	Mrps2
NM_080458	NM_080458	chr4	106483458	106492243	-	2708	1	Bsnd
NM_021402	NM_021402	chr4	155943813	155959604	+	3510	1	Ube2j2
NM_207223	NM_207223	chr4	155891875	155907251	+	4286	1	Acap3
NM_207706	NM_207706	chr2	165288031	165326479	-	4602	1	Elmo2
NM_080728	NM_080728	chr14	54970688	54994549	-	6011	1	Myh7
NR_002445	NR_002445	chr4	123712710	123718161	+	490	2	BC002163
NM_130882	NM_130882	chr17	32924688	32947361	-	1696	1	Cyp4f13
NM_130884	NM_130884	chr2	130279309	130284451	-	1506	1	Idh3b
NM_133215	NM_133215	chr11	87592217	87616296	+	5671	1	Mtmr4
NM_133228	NM_133228	chr13	67515782	67526231	-	2703	1	Zfp87
NM_178364	NM_178364	chr13	65278854	65297795	+	2859	1	Zfp369
NM_183000	NM_183000	chr5	24413451	24417834	+	1929	1	Asic3
NM_134188	NM_134188	chr12	83987861	83993875	+	2193	1	Acot2
NM_134250	NM_134250	chr11	46454931	46481254	+	2715	1	Havcr2
NM_134420	NM_134420	chr9	108854043	108862143	+	2706	1	Slc26a6
NM_138659	NM_138659	chr11	75486777	75509447	+	7437	1	Prpf8
NM_203507	NM_203507	chr8	47533645	47552837	+	2943	1	Rwdd4a
NM_138675	NM_138675	chr11	59948214	59963306	+	3009	1	Med9
NM_147201	NM_147201	chr5	31240918	31251562	+	2125	1	Nrbp1
NM_001145013	NM_001145013	chr7	5109787	5116911	-	1440	1	Rfpl4
NM_001081652	NM_001081652	chr11	6597823	6606054	-	4883	1	Nacad
NM_178656	NM_178656	chr11	66911991	66928700	+	3010	1	Pirt
NM_177573	NM_177573	chr4	124937048	124944661	+	2935	1	9930104L06Rik
NM_178357	NM_178357	chr12	24651371	24662782	+	3976	1	Klf11
NM_001001981	NM_001001981	chr1	78657825	78667601	+	3690	1	Utp14b
NM_183140	NM_183140	chr4	119169518	119173856	-	2332	1	Zfp691
NM_001284523	NM_001284523	chr15	99972780	100016358	+	6515	1	Larp4
NM_001029982	NM_001029982	chr7	128744870	128784835	+	4556	1	Sec23ip
NM_198105	NM_198105	chrX	151344223	151474134	+	7689	1	Fam120c
NM_153407	NM_153407	chr15	100479570	100495239	-	4119	1	Csrnp2
NM_172450	NM_172450	chr17	28896395	28915324	-	4580	1	4930539E08Rik
NM_029497	NM_029497	chr16	90751527	90810413	-	7324	1	Urb1
NR_040650	NR_040650	chr8	22060721	22071627	+	4960	1	Alg11
NM_177583	NM_177583	chr9	66775487	66795423	-	4550	1	Aph1b
NM_172458	NM_172458	chr17	32765497	32788287	-	10844	1	Zfp871
NM_145938	NM_145938	chr13	35895104	35906347	-	2726	1	Rpp40
NM_153056	NM_153056	chr11	120618372	120625002	-	1703	1	Sirt7
NM_172467	NM_172467	chr6	38287394	38299259	-	6532	1	Zc3hav1l
NM_145369	NM_145369	chr2	164176325	164182742	-	2318	1	Wfdc5
NM_173747	NM_173747	chrX	7697134	7710259	+	3560	1	Gpkow
NM_145373	NM_145373	chr11	121067403	121081139	-	1607	1	Sectm1a
NM_153134	NM_153134	chr7	24530648	24538600	+	6119	1	Irgq
NM_177594	NM_177594	chr14	63523610	63543953	-	2396	1	Mtmr9
NM_181584	NM_181584	chrX	74988545	75084905	-	2117	1	Gab3
NM_001166457	NM_001166457	chrX	75416628	75454001	+	4297	1	Brcc3
NM_172491	NM_172491	chr8	69271080	69303375	+	1994	1	D130040H23Rik
NM_001024135	NM_001024135	chr14	79426511	79431038	+	4525	1	Kbtbd7
NM_001033242	NM_001033242	chr14	103070216	103077630	+	2441	1	Cln5
NM_173733	NM_173733	chr10	128669887	128673918	-	2343	1	Suox
NM_172049	NM_172049	chr12	30584443	30591219	+	2951	1	Tmem18
NM_027801	NM_027801	chr16	43889902	43964314	+	3625	1	Ccdc191
NM_172503	NM_172503	chr8	84210942	84237042	-	4332	1	Zswim4
NM_153783	NM_153783	chr7	140125685	140134334	+	1728	1	Paox
NM_198020	NM_198020	chr8	84689247	84699808	+	2167	1	Trmt1
NM_198322	NM_198322	chr13	67813816	67827000	+	2315	1	Zfp273
NM_144806	NM_144806	chr11	61729650	61762088	-	1853	1	Prpsap2
NM_145974	NM_145974	chr11	51643089	51651073	-	2565	1	N4bp3
NM_144807	NM_144807	chr10	88473476	88503970	-	3229	1	Chpt1
NM_001282055	NM_001282055	chr13	55634999	55681267	+	5690	1	Ddx46
NM_145977	NM_145977	chr1	131970609	131982972	+	3341	1	Slc45a3
NM_172514	NM_172514	chr15	66526212	66561046	-	2919	1	Tmem71
NM_145391	NM_145391	chr6	125224212	125231860	-	2064	1	Tapbpl
NM_172516	NM_172516	chr1	132417453	132466959	+	6370	1	Dstyk
NM_172517	NM_172517	chr1	132477367	132505665	+	3616	1	Rbbp5
NM_153136	NM_153136	chr14	70577847	70582571	+	3711	1	Nudt18
NM_001163622	NM_001163622	chr17	85063477	85090267	-	3813	1	Prepl
NM_145985	NM_145985	chr9	44742144	44767808	-	3443	1	Arcn1
NM_145987	NM_145987	chr4	141614233	141618633	-	2058	1	Tmem82
NM_001040399	NM_001040399	chr3	40950631	40977793	+	1693	1	Larp1b
NM_170593	NM_170593	chr2	118779719	118795175	+	6619	1	Disp2
NM_001013751	NM_001013751	chr5	134557254	134560171	-	2915	1	Syna
NM_153076	NM_153076	chr5	24751002	24757843	-	599	1	Crygn
NM_172529	NM_172529	chr17	25234318	25240116	-	1220	1	Gnptg
NM_145404	NM_145404	chr8	106211054	106251694	+	2234	1	Prmt7
NM_145531	NM_145531	chr2	122053526	122118386	-	7623	1	Spg11
NM_181328	NM_181328	chr12	108825878	108835876	-	1958	1	Slc25a29
NM_145999	NM_145999	chr17	25838838	25844851	-	2787	1	Rhot2
NM_146000	NM_146000	chr9	46283012	46298783	+	2196	1	Bud13
NM_172541	NM_172541	chr5	135735490	135744172	-	1264	1	Tmem120a
NM_153077	NM_153077	chr2	24291196	24293820	+	532	1	Il1f10
NM_144818	NM_144818	chr2	127103810	127133954	-	2674	1	Ncaph
NM_029875	NM_029875	chr10	117733678	117746358	-	3476	1	Slc35e3
NM_172543	NM_172543	chr11	95337018	95381872	+	2307	1	Fam117a
NM_145743	NM_145743	chr10	42312585	42478565	-	2498	1	Lace1
NM_172550	NM_172550	chr10	76459567	76469114	-	4515	1	Ybey
NM_153059	NM_153059	chr10	122081260	122097102	-	1370	1	Tmem5
NM_001033263	NM_001033263	chr10	127078907	127093170	+	5613	1	Agap2
NM_001171582	NM_001171582	chr10	127296221	127311786	-	2939	1	Mars
NM_180599	NM_180599	chr11	57518665	57533817	+	4823	1	Mfap3
NM_001166669	NM_001166669	chr11	58120001	58168539	-	6184	1	Gemin5
NM_172560	NM_172560	chr11	69299496	69323873	-	3929	1	Cntrob
NM_153081	NM_153081	chr11	70213910	70216414	+	1749	1	Slc16a11
NM_178116	NM_178116	chr11	70669463	70688105	-	4622	1	Camta2
NM_001077496	NM_001077496	chr11	79513385	79523762	-	3525	1	Evi2b
NM_145431	NM_145431	chr11	82900768	82908395	-	1752	1	Nle1
NM_145432	NM_145432	chr11	83753637	83783754	+	5651	1	Heatr6
NM_001285988	NM_001285988	chr11	104502526	104550620	-	5775	1	Cdc27
NM_001080934	NM_001080934	chr11	115462473	115474398	+	3014	1	Slc16a5
NM_145441	NM_145441	chr12	4879032	4907520	-	2502	1	Ubxn2a
NM_172574	NM_172574	chr12	16988648	17000118	-	1919	1	Pqlc3
NM_172581	NM_172581	chr12	84345317	84361821	-	3347	1	Fam161b
NM_001290303	NM_001290303	chr12	100125450	100159653	-	3709	1	Nrde2
NM_177620	NM_177620	chr12	102283074	102390854	+	3853	1	Rin3
NM_173363	NM_173363	chr12	111538101	111546753	+	3952	1	Eif5
NM_145450	NM_145450	chr12	112808975	112816245	+	1908	1	BC022687
NM_001286155	NM_001286155	chr13	23353103	23369208	-	5190	1	Zfp322a
NM_178410	NM_178410	chr13	100595957	100616944	-	2195	1	Marveld2
NM_139299	NM_139299	chr13	112522807	112580662	-	3649	1	Il31ra
NM_001136240	NM_001136240	chr14	30009000	30040466	+	5642	1	Chdh
NM_145139	NM_145139	chr15	79075223	79094400	+	1878	1	Eif3l
NM_001205345	NM_001205345	chr15	79724068	79742536	-	3789	1	Sun2
NM_027905	NM_027905	chr15	89089107	89100340	+	2349	1	Selo
NM_001033277	NM_001033277	chr15	102116528	102136215	-	2424	1	Spryd3
NM_178069	NM_178069	chr16	30561369	30587589	-	2286	1	Lsg1
NM_175011	NM_175011	chr16	58635262	58638403	-	671	1	E330017A01Rik
NM_174848	NM_174848	chr16	59490775	59555752	-	6523	1	Crybg3
NM_144854	NM_144854	chr16	87553330	87595336	+	1645	1	Map3k7cl
NM_139154	NM_139154	chr17	25882114	25919714	-	2457	1	Rab40c
NM_001286040	NM_001286040	chr17	27909306	28062779	+	7065	1	Anks1
NM_153063	NM_153063	chr17	32965831	32979211	+	2331	1	Zfp472
NM_207541	NM_207541	chr17	33333728	33358878	-	2247	1	Zfp81
NM_172620	NM_172620	chr17	33955882	33966488	+	2744	1	Vps52
NM_144857	NM_144857	chr17	46667453	46674255	-	1191	1	Rrp36
NM_145488	NM_145488	chr17	46711463	46725541	+	3181	1	Pex6
NM_145490	NM_145490	chr17	55892093	55898930	+	2051	1	Zfp959
NM_153153	NM_153153	chr18	5046589	5119293	+	7387	1	Svil
NM_153552	NM_153552	chr18	9958180	9995484	+	3832	1	Thoc1
NM_153515	NM_153515	chr18	31759824	31784083	+	4771	1	Ammecr1l
NM_173394	NM_173394	chr18	46558231	46574533	-	3259	1	Ticam2
NM_178690	NM_178690	chr1	127868773	127943876	+	4225	1	Rab3gap1
NM_001081078	NM_001081078	chr1	128284756	128328318	-	6155	1	Lct
NM_144875	NM_144875	chr1	131867277	131872889	+	1183	1	Rab29
NM_172644	NM_172644	chr1	161040601	161070660	-	3602	1	Dars2
NM_001204910	NM_001204910	chr1	173723428	173741809	-	3473	1	AI607873
NM_146105	NM_146105	chr1	179546529	179627473	+	4532	1	Cnst
NM_001081259	NM_001081259	chr1	191005832	191026190	-	4075	1	Mfsd7b
NM_146107	NM_146107	chr1	36699202	36709925	-	2064	1	Actr1b
NM_001159657	NM_001159657	chr2	6098500	6130185	-	3619	1	Proser2
NM_001033293	NM_001033293	chr2	25361492	25365626	-	1679	1	Uap1l1
NM_153557	NM_153557	chr2	25459488	25461094	-	966	1	BC029214
NM_153558	NM_153558	chr2	25700074	25703326	+	705	1	Obp2a
NM_001001714	NM_001001714	chr2	25842997	25847248	-	1277	1	Sohlh1
NM_001290419	NM_001290419	chr2	26362765	26380653	-	4465	1	Snapc4
NM_207234	NM_207234	chr2	26953563	26964386	-	2271	1	Rexo4
NM_139197	NM_139197	chr2	28496891	28505415	+	1326	1	Gbgt1
NM_144886	NM_144886	chr2	31670737	31681307	+	1611	1	Exosc2
NM_175015	NM_175015	chr2	73908447	73911326	-	707	1	Atp5g3
NM_001081260	NM_001081260	chr2	85050460	85073048	+	5733	1	Tnks1bp1
NR_027371	NR_027371	chr2	91650118	91672320	+	2938	1	Arhgap1
NM_175466	NM_175466	chr2	114193461	114201432	-	4259	1	Zfp770
NM_145532	NM_145532	chr2	127704390	127729897	-	1961	1	Mall
NM_001033297	NM_001033297	chr2	144594065	144595365	+	455	1	Gm561
NM_177655	NM_177655	chr2	148750361	148755378	+	604	1	Cstl1
NM_144892	NM_144892	chr2	165000357	165034779	-	3081	1	Ncoa5
NM_144500	NM_144500	chr2	180119366	180162680	+	2729	1	Osbpl2
NM_144896	NM_144896	chr3	85574129	85654470	+	2292	1	Gatb
NM_178246	NM_178246	chr3	88336260	88362337	+	4423	1	Smg5
NM_173347	NM_173347	chr3	95253674	95282076	-	3130	1	Prune
NM_153513	NM_153513	chr3	95884973	95891930	-	441	1	BC028528
NR_033498	NR_033498	chr3	107039504	107054322	+	5542	1	AI504432
NM_146137	NM_146137	chr3	108186289	108192286	+	5582	1	Amigo1
NM_001033304	NM_001033304	chr3	108458069	108536522	-	3303	1	5330417C22Rik
NM_144902	NM_144902	chr3	116670798	116712280	-	4017	1	Slc35a3
NM_172689	NM_172689	chr4	40203777	40239825	-	4923	1	Ddx58
NM_172693	NM_172693	chr4	47091953	47123042	+	2204	1	Galnt12
NM_173400	NM_173400	chr4	86581285	86612022	-	3676	1	Haus6
NM_145549	NM_145549	chr4	99829500	99912783	+	1805	1	Efcab7
NM_001285783	NM_001285783	chr4	106651069	106655282	+	3090	1	Pars2
NM_175471	NM_175471	chr4	107070168	107084805	+	1597	1	Cyb5rl
NM_177669	NM_177669	chr4	114163384	114245028	+	814	1	Skint11
NM_183163	NM_183163	chr4	123787875	123829904	+	1207	1	Rhbdl2
NM_145552	NM_145552	chr4	125030014	125055382	+	2332	1	Gnl2
NM_172710	NM_172710	chr5	53107083	53213452	-	4486	1	Sel1l3
NM_178700	NM_178700	chr5	88659233	88676171	-	2741	1	Grsf1
NM_172713	NM_172713	chr5	92284010	92310024	-	4996	1	Sdad1
NM_144910	NM_144910	chr5	96070333	96161990	-	8550	1	Cnot6l
NM_144911	NM_144911	chr5	107597696	107661853	+	2307	1	Rpap2
NM_001164573	NM_001164573	chr5	114314941	114364576	+	4598	1	Myo1h
NM_146167	NM_146167	chr6	48718621	48724636	+	1265	1	Gimap7
NM_145570	NM_145570	chr6	82041628	82093099	+	1763	1	Eva1a
NM_146169	NM_146169	chr6	83806059	83831741	-	3317	1	Paip2b
NM_144918	NM_144918	chr6	85431976	85446429	+	2478	1	Smyd5
NM_001081112	NM_001081112	chr6	118502564	118562256	-	5668	1	Ankrd26
NM_145573	NM_145573	chr6	147042770	147070902	+	1057	1	Mrps35
NR_027963	NR_027963	chr6	47943175	47954549	+	4409	1	Zfp783
NM_170759	NM_170759	chr7	4915217	4922003	+	3519	1	Zfp628
NM_172738	NM_172738	chr7	7114683	7121476	-	2030	1	Zfp954
NM_001024699	NM_001024699	chr7	13005666	13009800	-	2136	1	Zbtb45
NM_001033314	NM_001033314	chr7	18890884	18910404	-	1994	1	Ccdc61
NM_199149	NM_199149	chr7	19530967	19562398	-	2956	1	Ppp1r37
NM_001102613	NM_001102613	chr7	24611328	24629297	+	2265	1	Phldb3
NM_001033315	NM_001033315	chr7	27523261	27531174	+	2408	1	Hipk4
NM_198027	NM_198027	chr7	30308753	30314303	+	936	1	Alkbh6
NM_194057	NM_194057	chr7	30860568	30861470	-	901	1	Ffar1
NM_001008422	NM_001008422	chr7	45002950	45016249	-	4164	1	Scaf1
NM_178070	NM_178070	chr7	80269655	80291579	+	2543	1	Vps33b
NM_177448	NM_177448	chr7	99219084	99238611	-	1764	1	Mogat2
NM_001291358	NM_001291358	chr7	102210335	102238564	+	2156	1	Pgap2
NM_181517	NM_181517	chr7	110018425	110055114	+	3091	1	Ipo7
NM_145585	NM_145585	chr7	119715094	119720798	-	2682	1	Thumpd1
NM_001164580	NM_001164580	chr7	120677620	120734854	+	4837	1	BC030336
NM_001033318	NM_001033318	chr7	121922839	121981693	-	2865	1	Cog7
NM_172747	NM_172747	chr7	126928879	126945609	+	1646	1	Kctd13
NM_178708	NM_178708	chr8	13077525	13105343	-	2392	1	Pcid2
NM_172282	NM_172282	chr8	13288013	13322924	+	4518	1	Tmco3
NM_001253754	NM_001253754	chr8	54779434	55060878	+	2957	1	Gpm6a
NM_172754	NM_172754	chr8	69610654	69625548	-	2455	1	Zfp868
NM_183170	NM_183170	chr8	70758649	70760921	-	948	1	Mpv17l2
NM_172756	NM_172756	chr8	71406012	71410542	+	2761	1	Ankle1
NM_145599	NM_145599	chr8	77595978	77610653	-	2670	1	Tmem184c
NM_001013380	NM_001013380	chr8	104417674	104443047	-	4618	1	Dync1li2
NM_145604	NM_145604	chr8	105225188	105253051	+	2853	1	D230025D16Rik
NM_001033320	NM_001033320	chr8	105690906	105698165	+	2485	1	Rltpr
NM_001301100	NM_001301100	chr8	105880881	105893225	+	4749	1	Edc4
NM_175646	NM_175646	chr8	109565986	109574051	+	1790	1	Txnl4b
NM_146218	NM_146218	chr8	111270944	111300222	-	4428	1	Rfwd3
NM_001009950	NM_001009950	chr8	119479603	119501698	-	2609	1	Slc38a8
NM_146219	NM_146219	chr8	119862305	119876989	+	2135	1	Klhl36
NM_172761	NM_172761	chr8	121097557	121108379	-	2434	1	Mthfsd
NM_194446	NM_194446	chr8	123224841	123232256	+	1634	1	Cdk10
NM_172288	NM_172288	chr8	123897123	123949265	-	5780	1	Nup133
NM_172289	NM_172289	chr9	15709769	15738789	+	1924	1	Slc36a4
NM_146222	NM_146222	chr9	37489321	37524150	+	2285	1	Msantd2
NM_175483	NM_175483	chr9	56917200	56928371	-	4560	1	Snx33
NM_146223	NM_146223	chr9	57599992	57606281	-	2854	1	Cplx3
NM_001289645	NM_001289645	chr9	96823343	96889474	-	3181	1	Pxylp1
NM_153099	NM_153099	chr9	110798185	110803744	+	1548	1	Prss42
NM_173364	NM_173364	chr9	122848910	122866006	-	6180	1	Zfp445
NM_001033157	NM_001033157	chr12	18514510	18535254	+	2464	1	5730507C01Rik
NM_153403	NM_153403	chr4	126435013	126468421	-	7044	1	Ago1
NM_173415	NM_173415	chrX	13467672	13489313	+	3616	1	Nyx
NM_181751	NM_181751	chrX	48667979	48674478	-	2265	1	Gpr119
NM_145630	NM_145630	chrX	93764616	93832095	-	1986	1	Pdk3
NM_001039060	NM_001039060	chrX	94234930	94255968	+	3995	1	Klhl15
NM_001105557	NM_001105557	chr10	82224856	82241275	-	2025	1	Zfp938
NM_172795	NM_172795	chr11	78472330	78497754	-	5033	1	Sarm1
NM_001030291	NM_001030291	chr11	118988188	118992841	+	1363	1	Enpp7
NM_198111	NM_198111	chr12	52699383	53151015	+	10247	1	Akap6
NM_001033335	NM_001033335	chr12	104214633	104221129	+	2205	1	Serpina3f
NM_001001152	NM_001001152	chr13	67254918	67269068	-	3482	1	Zfp458
NM_183175	NM_183175	chr14	60768134	60780869	+	1897	1	C1qtnf9
NM_001081409	NM_001081409	chr15	66577572	66645255	+	6647	1	Phf20l1
NM_177716	NM_177716	chr15	98167806	98170134	+	2326	1	Ccdc184
NM_001045559	NM_001045559	chr17	32993139	33005457	+	3002	1	Zfp952
NM_001271547	NM_001271547	chr18	36528152	36556272	+	2943	1	Slc4a9
NM_001160399	NM_001160399	chr18	46282151	46311928	-	2789	1	Ccdc112
NM_198616	NM_198616	chr19	5453163	5457563	-	4398	1	Ccdc85b
NM_172835	NM_172835	chr19	4931855	4943092	-	1928	1	Peli3
NM_172841	NM_172841	chr1	12866550	12991135	-	8500	1	Slco5a1
NM_153128	NM_153128	chr1	134455531	134490873	+	3168	1	Klhl12
NM_001081126	NM_001081126	chr1	165295766	165326745	+	6828	1	Gpr161
NM_172849	NM_172849	chr1	81077317	81271651	+	4899	1	Nyap2
NM_001001309	NM_001001309	chr2	12106660	12301920	-	5750	1	Itga8
NM_146253	NM_146253	chr2	37425500	37430919	-	4531	1	Zbtb6
NM_153405	NM_153405	chr2	76369984	76383767	+	1885	1	Rbm45
NM_030234	NM_030234	chr2	121506723	121544859	+	4229	1	Wdr76
NM_197945	NM_197945	chr2	130632765	130642844	-	4312	1	Lzts3
NM_183023	NM_183023	chr2	163863881	163918683	-	825	1	Rims4
NM_001008502	NM_001008502	chr3	37312554	37321451	+	2430	1	Bbs12
NM_177730	NM_177730	chr4	4764351	4793306	-	4620	1	Impad1
NM_175518	NM_175518	chr4	56876013	56947429	-	6875	1	Tmem245
NM_172877	NM_172877	chr4	143412426	143421087	+	3875	1	Pramef8
NM_175529	NM_175529	chr7	4148183	4149872	-	1687	1	Leng9
NM_011748	NM_011748	chr7	30036359	30051396	-	3483	1	Zfp14
NM_001034115	NM_001034115	chr7	44310264	44358353	+	7569	1	Shank1
NM_153592	NM_153592	chr8	27023799	27039435	+	3931	1	Erlin2
NM_172919	NM_172919	chr9	20581328	20595193	+	2747	1	Zfp846
NM_001163143	NM_001163143	chr9	67830532	67832330	-	1348	1	C2cd4a
NM_173434	NM_173434	chr11	48965817	48979398	-	2398	2	9930111J21Rik2
NM_183185	NM_183185	chrX	21079150	21089229	-	4651	1	Zfp300
NM_146261	NM_146261	chrX	137049594	137082501	+	8289	1	Fam199x
NM_172150	NM_172150	chr2	163017472	163046135	+	2109	1	Ift52
NM_145155	NM_145155	chr5	146385006	146471125	+	2673	1	Wasf3
NM_001101486	NM_001101486	chr6	29281141	29290676	+	1169	1	Fam71f2
NM_001081429	NM_001081429	chr9	37275835	37348392	-	3507	1	Ccdc15
NM_139309	NM_139309	chr4	53714182	53763271	+	3370	1	Fktn
NM_001287074	NM_001287074	chr10	77686569	77886769	+	2432	1	Tspear
NM_207153	NM_207153	chr11	58580837	58581877	+	1038	1	Olfr325
NM_146431	NM_146431	chr14	52409889	52410927	-	1036	1	Olfr1510
NM_146534	NM_146534	chr13	21142111	21143055	-	943	1	Olfr1368
NM_146537	NM_146537	chr11	58841116	58842042	+	925	1	Olfr311
NM_146613	NM_146613	chr9	39909805	39910728	+	922	1	Olfr229
NM_146877	NM_146877	chr11	49148259	49149212	+	952	1	Olfr1395
NM_153804	NM_153804	chr12	76533560	76579039	+	4934	1	Plekhg3
NM_153600	NM_153600	chr6	38381524	38427647	+	4120	1	Ttc26
NM_010822	NM_010822	chr11	32226505	32232702	+	1739	1	Mpg
NM_001127576	NM_001127576	chr11	102665585	102682238	+	4567	1	Meioc
NM_001252071	NM_001252071	chr12	16670615	16757239	-	7819	1	Greb1
NM_183392	NM_183392	chr5	92415540	92435199	-	2318	1	Nup54
NM_080850	NM_080850	chr1	93309437	93342788	-	5099	1	Pask
NR_027618	NR_027618	chr2	120316461	120353133	-	4391	1	Vps39
NM_001001882	NM_001001882	chr2	181319724	181356616	+	4403	1	Rtel1
NM_001164597	NM_001164597	chr2	181582103	181592461	-	5353	1	Zfp512b
NM_175554	NM_175554	chr4	126556980	126593903	+	4954	1	Clspn
NM_008146	NM_008146	chr5	110176701	110223155	+	4791	1	Golga3
NM_001168562	NM_001168562	chr7	12977848	12985716	+	4907	1	Zfp446
NM_173013	NM_173013	chr8	70905974	70917529	+	3265	1	Map1s
NM_212449	NM_212449	chr9	50605240	50617464	-	3308	1	AU019823
NM_178253	NM_178253	chr12	69241832	69283961	+	1934	1	Klhdc1
NM_027477	NM_027477	chr6	47835661	47868257	+	3470	1	Zfp398
NM_019866	NM_019866	chr7	44525995	44532071	-	2778	1	Spib
NM_172310	NM_172310	chr7	65644898	65692093	+	3173	1	Tarsl2
NM_201406	NM_201406	chr11	78328422	78342776	+	2474	1	Pigs
NM_001013386	NM_001013386	chr11	83410072	83421038	+	3475	1	Rasl10b
NM_198627	NM_198627	chr2	157914653	157944719	+	1357	1	Vstm2l
NM_001007578	NM_001007578	chrX	134748455	134751419	-	2028	1	Armcx6
NM_175658	NM_175658	chr13	23934462	23934913	+	449	1	Hist1h2aa
NM_176921	NM_176921	chr9	58488603	58499742	+	2134	1	6030419C18Rik
NM_176923	NM_176923	chr8	111448784	111522107	-	5133	1	Wdr59
NM_145360	NM_145360	chr13	8885606	8892396	+	2860	1	Idi1
NM_001033379	NM_001033379	chr6	119175253	119221614	+	3300	1	Dcp1b
NM_176968	NM_176968	chr10	34303612	34418528	-	2702	1	Nt5dc1
NM_176987	NM_176987	chr13	54503805	54551290	+	4781	1	Simc1
NM_177016	NM_177016	chr13	23897889	23915007	-	2469	1	Slc17a4
NM_001254744	NM_001254744	chr10	22113050	22149270	-	2077	1	E030030I06Rik
NM_001081288	NM_001081288	chr15	55015129	55072152	-	5005	1	Taf2
NM_177041	NM_177041	chr3	89402673	89411863	-	2178	1	Flad1
NM_178869	NM_178869	chr15	83483769	83510907	-	2060	1	Ttll1
NM_198035	NM_198035	chr10	127739538	127747339	+	5946	1	Zbtb39
NM_001164658	NM_001164658	chr7	29181532	29214033	-	3536	1	Catsperg1
NM_177117	NM_177117	chr9	119102478	119147694	+	5225	1	Dlec1
NR_040401	NR_040401	chr9	78175914	78178882	+	1443	1	C920006O11Rik
NM_177130	NM_177130	chr3	85869846	85887518	-	2733	1	Glt28d2
NM_177157	NM_177157	chr2	119167788	119172389	+	624	1	Gchfr
NM_001081264	NM_001081264	chr4	99715630	99763460	+	3097	1	Alg6
NM_177178	NM_177178	chr15	9140570	9197450	+	3026	1	Lmbrd2
NM_001161540	NM_001161540	chr9	58196297	58201799	-	3985	1	Islr2
NM_177214	NM_177214	chr2	127208404	127240451	+	6693	1	Snrnp200
NM_177235	NM_177235	chr1	33852052	33907621	-	2283	1	Bend6
NM_177244	NM_177244	chr2	69686824	69712606	-	2840	1	Fastkd1
NM_177267	NM_177267	chr12	80335847	80436601	-	5696	1	Dcaf5
NM_001081299	NM_001081299	chr15	23036463	23474418	+	2731	1	Cdh18
NM_177279	NM_177279	chr8	123212858	123222045	+	513	1	Spata33
NM_001037863	NM_001037863	chrX	60223290	60403981	-	6015	1	Atp11c
NR_015566	NR_015566	chr1	195017399	195037908	+	5187	1	A330023F24Rik
NM_001111017	NM_001111017	chr17	6040571	6079739	-	5611	1	Serac1
NM_177312	NM_177312	chr7	13258967	13278721	-	3340	1	6330408A02Rik
NM_001037713	NM_001037713	chr11	72301629	72313733	+	2590	1	Xaf1
NR_045285	NR_045285	chr13	44121167	44125179	+	1199	1	Gm5083
NM_001145978	NM_001145978	chr14	56575619	56659798	+	6354	1	Parp4
NM_001166475	NM_001166475	chr15	82059151	82066538	+	4669	1	4930407I10Rik
NM_001163319	NM_001163319	chr15	89099098	89123150	-	6930	1	Tubgcp6
NM_001012402	NM_001012402	chr17	24753003	24758684	+	1216	1	Hs3st6
NR_046167	NR_046167	chr1	136127719	136131183	-	504	1	Gm15850
NR_046171	NR_046171	chr1	153721240	153737829	-	3334	1	C230024C17Rik
NM_177869	NM_177869	chr5	21424903	21482124	+	3072	1	Fam185a
NM_183308	NM_183308	chr6	5264624	5298373	-	1839	1	Pon2
NM_207258	NM_207258	chr6	29319140	29336022	+	1578	1	Fam71f1
NM_001033420	NM_001033420	chr7	134670687	135173647	+	6761	1	Dock1
NM_183315	NM_183315	chr8	4257646	4259274	-	1222	1	Ctxn1
NM_198632	NM_198632	chr8	124793019	124834704	+	8796	1	Trim67
NM_212487	NM_212487	chr15	101946004	101954287	-	3423	1	Krt78
NM_178036	NM_178036	chr2	25682726	25686080	+	1097	1	Lcn10
NM_199312	NM_199312	chr2	181220016	181222851	+	1376	1	BC051628
NM_001033428	NM_001033428	chr5	113226909	113239263	+	1820	1	Tmem211
NM_001029985	NM_001029985	chr6	29482036	29507952	-	4848	1	Kcp
NM_177321	NM_177321	chr12	59095800	59109130	+	1622	1	Mia2
NM_001290566	NM_001290566	chr2	32762177	32775339	-	2661	1	Ttc16
NM_177394	NM_177394	chr11	119491620	119511465	+	5154	1	Endov
NM_178935	NM_178935	chrX	162778917	162829454	-	3852	1	Txlng
NM_172252	NM_172252	chr19	3283047	3292837	+	983	1	Mrpl21
NM_194269	NM_194269	chr17	80290212	80297476	+	640	1	Morn2
NR_027885	NR_027885	chr18	36801763	36802107	+	344	1	Vaultrc5
NR_040354	NR_040354	chr2	143535476	143547837	-	4230	1	Pcsk2os1
NM_001045530	NM_001045530	chr11	43528749	43586999	+	2701	1	Ccnjl
NM_001013769	NM_001013769	chr13	67173182	67183498	+	2039	1	Rsl1
NR_045327	NR_045327	chr15	101221191	101224777	-	1315	1	A330009N23Rik
NM_001256309	NM_001256309	chr16	32804888	32810446	-	514	1	Gm933
NM_198651	NM_198651	chr19	28923064	28964154	-	2137	1	4430402I18Rik
NM_001001334	NM_001001334	chr2	18699022	18749605	+	1638	1	Spag6l
NM_001034875	NM_001034875	chr2	153940862	153963852	+	2097	1	Bpifb4
NM_001081201	NM_001081201	chr4	11265079	11322131	-	2963	1	Dpy19l4
NM_001034876	NM_001034876	chr4	117869260	117872470	-	1271	1	Ccdc24
NM_001286663	NM_001286663	chr6	40471468	40481823	+	2008	1	Ssbp1
NM_001163445	NM_001163445	chr6	133105239	133107750	+	2509	1	Smim10l1
NM_001029872	NM_001029872	chr7	128173946	128205503	+	3931	1	Itgad
NM_203492	NM_203492	chr7	143763710	143766993	-	1817	1	Mrgprg
NM_001166645	NM_001166645	chr8	71908606	71918851	+	5646	1	Zfp882
NM_201372	NM_201372	chr9	44410164	44418007	-	1145	1	Ccdc84
NM_001164686	NM_001164686	chrX	150408578	150440905	-	1257	1	Tmem29
NM_027740	NM_027740	chr10	99107171	99197988	+	2713	1	Poc1b
NM_001033475	NM_001033475	chr12	87166242	87200229	-	7171	1	Tmed8
NM_001013780	NM_001013780	chr4	141618825	141623834	-	2675	1	Slc25a34
NM_029645	NM_029645	chr5	115333242	115341161	-	1772	1	Gatc
NM_001190332	NM_001190332	chrX	50892645	50942710	-	4634	1	Frmd7
NR_029817	NR_029817	chr3	88215598	88215686	+	88	1	Mir9-1
NR_029793	NR_029793	chr7	141221384	141221493	-	109	1	Mir210
NR_003270	NR_003270	chr4	132351933	132353686	-	434	1	Snhg3
NM_201611	NM_201611	chr17	36812175	36815566	+	1397	1	H2-M10.6
NM_001001496	NM_001001496	chrX	160902116	160907052	-	2013	1	Gja6
NM_001013786	NM_001013786	chr13	21442175	21453727	-	3984	1	Zscan26
NM_001037751	NM_001037751	chr14	62977524	62984510	-	441	1	Defb48
NM_001177392	NM_001177392	chr2	29761528	29764089	+	623	1	Gm13547
NM_001033457	NM_001033457	chr5	29434667	29452169	+	3529	1	Nom1
NM_001024707	NM_001024707	chr7	35200878	35215345	-	3984	1	Lrp3
NR_040658	NR_040658	chr10	84547417	84553338	-	1330	1	Platr7
NM_001002929	NM_001002929	chr11	115564444	115583924	+	2138	1	Nup85
NM_001104641	NM_001104641	chr6	123822814	123853190	-	2561	1	Vmn2r25
NR_045096	NR_045096	chr7	24818795	24840275	+	1868	1	Gm5893
NM_001025381	NM_001025381	chr18	31942999	31949636	-	5189	1	Gpr17
NM_001200023	NM_001200023	chr8	69741639	69749962	-	2285	1	Zfp963
NM_001276448	NM_001276448	chr2	25676786	25681607	+	799	1	Lcn6
NM_178213	NM_178213	chr3	96219916	96220353	+	435	1	Hist2h2ab
NR_040749	NR_040749	chr7	104315031	104324838	+	825	1	Gm15133
NR_077226	NR_077226	chr4	40720154	40722841	-	1622	1	Gm6297
NM_001177349	NM_001177349	chr1	173591957	173599274	-	2674	1	Pydc4
NM_001103366	NM_001103366	chr10	130471821	130497379	-	2540	1	Vmn2r87
NR_033622	NR_033622	chr9	22330139	22330690	-	551	1	Gm6607
NR_037965	NR_037965	chr6	34303934	34317443	-	1342	1	Gm6644
NM_001039553	NM_001039553	chr8	19729576	19753602	+	2577	1	4930467E23Rik
NM_001161806	NM_001161806	chr2	164662894	164674087	-	610	1	Wfdc11
NM_001167906	NM_001167906	chr3	100993529	101029495	-	3228	1	Cd101
NM_001104579	NM_001104579	chr17	23343977	23360128	+	2567	1	Vmn2r115
NR_015472	NR_015472	chr17	23749236	23754065	+	3159	1	9530082P21Rik
NM_001039153	NM_001039153	chr5	122239495	122264460	-	4054	1	Tctn1
NM_001109743	NM_001109743	chr18	76856405	76900342	+	3130	1	Skor2
NR_036572	NR_036572	chr4	132219893	132220589	-	696	1	Rps15a-ps4
NM_001101598	NM_001101598	chr7	4877053	4895716	+	1079	1	Isoc2a
NM_001101600	NM_001101600	chr9	59951294	59959044	+	609	1	Gm7616
NR_003372	NR_003372	chr9	21607084	21608329	-	1245	1	Gm7904
NM_001081431	NM_001081431	chr5	145283343	145291469	+	1989	1	Zscan25
NR_015510	NR_015510	chr7	92740706	92741459	-	667	1	4632427E13Rik
NR_073378	NR_073378	chr17	5480989	5483069	-	2080	1	Gm8363
NM_001101603	NM_001101603	chr4	120588745	120609672	+	414	1	Gm8439
NM_001042407	NM_001042407	chr4	155067030	155072406	+	1639	1	Pex10
NM_001145360	NM_001145360	chr6	29471437	29473429	+	642	1	Gm9047
NM_001105061	NM_001105061	chr7	43018798	43048106	+	2557	1	Gm9268
NM_025880	NM_025880	chr7	44246722	44252319	+	1974	1	2410002F23Rik
NM_001163576	NM_001163576	chr15	76232995	76243440	-	3383	1	Parp10
NR_046046	NR_046046	chr2	84500748	84506873	-	827	1	Gm13710
NR_029821	NR_029821	chr8	84178873	84178961	-	88	1	Mir181c
NR_029771	NR_029771	chr12	108658620	108658718	+	98	1	Mir342
NR_030252	NR_030252	chr16	14159626	14159692	+	66	1	Mir484
NR_029552	NR_029552	chr8	94324311	94324381	+	70	1	Mir138-2
NR_029830	NR_029830	chr19	6264643	6264728	+	85	1	Mir194-2
NR_029803	NR_029803	chr10	126995530	126995613	+	83	1	Mir26a-2
NR_030481	NR_030481	chr4	135416555	135416633	-	78	1	Mir700
NR_030756	NR_030756	chr11	77078064	77078172	-	108	1	Mir423
NR_030492	NR_030492	chr9	108969922	108970003	+	81	1	Mir711
NM_001081975	NM_001081975	chr2	121461666	121474023	-	1878	1	Mfap1b
NR_003373	NR_003373	chr11	68901589	68904534	+	516	1	Gm15772
NM_008929	NM_008929	chr14	118937932	118981702	+	5176	1	Dnajc3
NR_015525	NR_015525	chr1	92933543	92950590	-	1670	1	9430060I03Rik
NM_001083945	NM_001083945	chr17	6904716	6948356	-	1604	1	Rsph3b
NM_001083938	NM_001083938	chr17	8128598	8147788	-	951	1	Rnaset2a
NR_026798	NR_026798	chr13	21504316	21506524	-	932	1	Zfp389
NR_033547	NR_033547	chr9	45107176	45135606	-	2200	1	Gm10684
NR_033511	NR_033511	chr17	15350813	15354461	-	720	1	Gm10510
NR_045113	NR_045113	chr12	44221356	44224380	+	3024	1	Gm2027
NM_001142750	NM_001142750	chrX	118479706	118480737	-	1029	2	Tgif2lx2
NR_033625	NR_033625	chr5	147418620	147423044	+	1059	1	D5Ertd605e
NM_001099319	NM_001099319	chr4	127126043	127129660	+	1134	1	Gm12942
NR_110499	NR_110499	chr7	45324958	45325651	+	693	1	Rpl14-ps1
NR_045893	NR_045893	chr11	6525591	6528760	-	588	1	Gm11974
NR_029470	NR_029470	chr15	79166066	79216401	+	675	1	Gm10863
NR_030709	NR_030709	chr17	22776230	22817747	-	4216	1	Gm16386
NM_001105179	NM_001105179	chr7	10087198	10105659	-	2552	1	Vmn2r51
NR_033631	NR_033631	chr16	30008667	30021430	+	2425	1	4632428C04Rik
NM_177001	NM_177001	chr7	128234451	128238031	-	3578	1	9130023H24Rik
NM_001301269	NM_001301269	chr2	118745758	118748810	+	3050	1	Inafm2
NR_028578	NR_028578	chr7	132315664	132318291	+	2627	1	Gm10584
NR_030681	NR_030681	chr7	24661294	24663109	+	1078	1	Gm4598
NM_001099328	NM_001099328	chr2	174643534	174710830	+	9798	1	Zfp831
NM_001254951	NM_001254951	chr7	27984471	28014115	-	6538	1	Zfp850
NR_030529	NR_030529	chr11	50357785	50357879	-	94	1	Mir804
NR_030607	NR_030607	chr14	54975700	54975776	-	76	1	Mir208b
NR_030612	NR_030612	chr6	3721301	3721385	-	84	1	Mir653
NR_026944	NR_026944	chr10	77257773	77259223	-	709	1	Gm10941
NR_028538	NR_028538	chr3	108554342	108554402	-	60	1	Scarna2
NR_026741	NR_026741	chrX	7375925	7378042	+	1876	1	Gm14379
NR_027290	NR_027290	chr2	181579532	181582150	+	2016	1	Uckl1os
NM_001145863	NM_001145863	chr2	150181755	150193279	+	1722	1	Gm14139
NR_035423	NR_035423	chr19	23149431	23149551	+	120	1	Mir1192
NR_035517	NR_035517	chrX	72992079	72992144	+	65	1	Mir2137
NR_035502	NR_035502	chr1	184822407	184822488	-	81	1	Mir1981
NR_045914	NR_045914	chr1	63114740	63158295	+	1724	1	Ino80dos
NR_045947	NR_045947	chr12	118518297	118530193	-	880	1	D230030E09Rik
NM_001163246	NM_001163246	chr13	67589439	67609707	-	4829	1	Zfp729b
NR_045709	NR_045709	chr16	33379854	33380736	-	745	1	1700007L15Rik
NR_040427	NR_040427	chr5	30573987	30588619	-	4819	1	Gm9899
NM_001205032	NM_001205032	chr10	77689957	77690757	-	799	1	Gm19402
NR_040320	NR_040320	chr19	41746961	41750097	+	2235	1	Gm19424
NM_001255991	NM_001255991	chr5	107437997	107491596	+	1124	1	Btbd8
NR_034038	NR_034038	chr5	100420842	100429535	-	621	1	5430416N02Rik
NR_040680	NR_040680	chr11	109440078	109453359	+	1774	1	LOC100503496
NM_001201391	NM_001201391	chr7	103826523	103827928	-	634	1	Hbb-bs
NM_001195244	NM_001195244	chr8	3621551	3624235	+	1187	1	Pet100
NM_001195034	NM_001195034	chr7	44253087	44257204	-	1266	1	Acpt
NR_046275	NR_046275	chr2	33641193	33645663	+	3812	1	C130021I20Rik
NR_046044	NR_046044	chr12	76546972	76547925	-	537	1	AI463170
NR_045057	NR_045057	chr12	80942652	80945399	-	1139	1	Gm20337
NR_045295	NR_045295	chr12	111572317	111574402	-	1952	1	2810029C07Rik
NR_037212	NR_037212	chr10	95559231	95559321	-	90	1	Mir3058
NR_037295	NR_037295	chr8	108936860	108936938	+	78	1	Mir3108
NR_037269	NR_037269	chr11	114344526	114749749	-	75	1	Mir466n
NR_037240	NR_037240	chr11	5254598	5254622	+	24	1	Mir3079
NR_077233	NR_077233	chr15	89476252	89484850	+	867	1	C230037L18Rik
NR_039544	NR_039544	chr7	99641530	99641549	-	19	1	Mir3965
NR_039583	NR_039583	chr8	111016450	111016530	-	80	1	Mir3473d
NR_039559	NR_039559	chr11	60728663	60728726	+	63	1	Mir5100
NR_040366	NR_040366	chr5	109933563	109941710	+	1548	1	Gm15446
NR_104353	NR_104353	chr2	120027483	120043032	+	5074	1	Gm28042
NR_105853	NR_105853	chr11	117077348	117077457	+	109	1	Mir6516
NR_105887	NR_105887	chr11	60202262	60202327	-	65	1	Mir6922
NR_105943	NR_105943	chr17	56418846	56418909	-	63	1	Mir6977
NR_105953	NR_105953	chr19	5679004	5679076	-	72	1	Mir6987
NR_106013	NR_106013	chr7	24970010	24970075	-	65	1	Mir7046
NR_106039	NR_106039	chr8	88138206	88138274	+	68	1	Mir7071
NR_106042	NR_106042	chr8	105951637	105951699	-	62	1	Mir7074
NR_106072	NR_106072	chr15	79998970	79999026	-	56	1	Mir7213
NR_106076	NR_106076	chr17	27355738	27355799	+	61	1	Mir7217
NR_106168	NR_106168	chr2	32687630	32687766	-	136	1	Mir8093
NR_105924	NR_105924	chr15	89305658	89305732	-	74	1	Mir6959
NR_106052	NR_106052	chr9	22113944	22114013	-	69	1	Mir7084
NR_105883	NR_105883	chr11	4891345	4891402	+	57	1	Mir6918
NR_106015	NR_106015	chr7	25217668	25217725	-	57	1	Mir7048
NR_106016	NR_106016	chr7	28560925	28560984	-	59	1	Mir7049
NR_106025	NR_106025	chr7	126367971	126368045	-	74	1	Mir7058
NR_106099	NR_106099	chr8	70798135	70798192	+	57	1	Mir7240
NR_106106	NR_106106	chr15	90224360	90224412	+	52	1	Mir7648
NR_106191	NR_106191	chr8	84005628	84005764	+	136	1	Mir8111
NR_110508	NR_110508	chr16	22874983	22894386	-	1765	1	Gm30505

## Sheet: Pax_IKZF1_RUNX_unique_genes
Transcript/RepeatID	Gene ID (cmd=analyzeRNA.pl rna mm10 -d Documents/Basespace/Tina-33488506/Tagdirs-Tina/T1-CLP_-_-/)	chr	start	end	strand	Length	Copies	Annotation/Divergence
NM_007414	NM_007414	chr16	38445399	38452689	-	1577	1	Adprh
NM_009634	NM_009634	chr15	80948490	80970947	+	3697	1	Adsl
NM_001005605	NM_001005605	chr6	140623502	140655481	+	6369	1	Aebp2
NM_020559	NM_020559	chr9	106233455	106247954	-	2689	1	Alas1
NM_001301211	NM_001301211	chr8	109778583	109864209	+	6841	1	Ap1g1
NM_007455	NM_007455	chr14	55098835	55106593	-	2664	1	Ap1g2
NM_007457	NM_007457	chr5	137034994	137046060	-	1270	1	Ap1s1
NM_007465	NM_007465	chr9	7818226	7837057	-	3322	1	Birc2
NM_001301354	NM_001301354	chr16	31296192	31314808	-	1997	1	Apod
NM_007476	NM_007476	chr11	59211412	59228267	-	1792	1	Arf1
NM_016802	NM_016802	chr9	108306160	108337943	+	2167	1	Rhoa
NM_019734	NM_019734	chr8	41340646	41374697	-	2232	1	Asah1
NM_001112738	NM_001112738	chr2	10056031	10080510	-	1788	1	Atp5c1
NM_001161419	NM_001161419	chr11	96072793	96075631	-	798	1	Atp5g1
NM_007508	NM_007508	chr16	44085404	44139019	-	3929	1	Atp6v1a
NM_013477	NM_013477	chr8	105524470	105566040	-	1607	1	Atp6v0d1
NM_007510	NM_007510	chr6	120795244	120822685	-	1193	1	Atp6v1e1
NM_009729	NM_009729	chr17	24163866	24169429	-	1146	1	Atp6v0c
NM_007527	NM_007527	chr7	45461695	45466898	-	861	1	Bax
NM_001164090	NM_001164090	chr12	31595354	31634658	-	1781	1	Bcap29
NM_009739	NM_009739	chr7	127904073	127909664	+	2843	1	Bckdk
NM_013479	NM_013479	chr9	75347758	75351640	+	1224	1	Bcl2l10
NM_007539	NM_007539	chr12	105604091	105605428	+	1335	1	Bdkrb1
NM_009751	NM_009751	chr2	143826528	143863173	-	2362	1	Bfsp1
NM_009756	NM_009756	chr6	87428994	87434512	+	1321	1	Bmp10
NM_001081001	NM_001081001	chr5	150522621	150570146	+	11104	1	Brca2
NM_007566	NM_007566	chr17	74528295	74703356	+	15693	1	Birc6
NM_001077184	NM_001077184	chr10	79704358	79711979	+	1395	1	Bsg
NM_007573	NM_007573	chr11	70977846	70983026	-	1157	1	C1qbp
NM_007576	NM_007576	chr1	130635921	130661618	-	1871	1	C4bp
NM_021395	NM_021395	chr9	44379490	44392369	+	4404	1	Hyou1
NM_009790	NM_009790	chr12	100199435	100209824	+	4117	1	Calm1
NM_007589	NM_007589	chr17	87433401	87446935	-	1208	1	Calm2
NM_007591	NM_007591	chr8	84842088	84846931	-	1932	1	Calr
NM_184053	NM_184053	chr6	29348106	29376675	+	3220	1	Calu
NM_007596	NM_007596	chr13	55623005	55632416	+	1381	1	Caml
NM_007609	NM_007609	chr9	5308849	5336791	+	1432	1	Casp4
NM_007622	NM_007622	chr11	96789136	96808640	+	1266	1	Cbx1
NM_007634	NM_007634	chr17	24223232	24251409	-	3080	1	Ccnf
NM_009839	NM_009839	chr11	82719248	82764321	-	1788	1	Cct6b
NM_007638	NM_007638	chr6	85451505	85468477	+	2438	1	Cct7
NM_013487	NM_013487	chr9	44981786	44987052	+	1323	1	Cd3d
NM_007648	NM_007648	chr9	44998743	45009590	-	1426	1	Cd3e
NM_009860	NM_009860	chr18	34732995	34751533	-	1926	1	Cdc25c
NM_009862	NM_009862	chr16	18780447	18811972	-	2121	1	Cdc45
NM_183417	NM_183417	chr10	128697939	128705051	-	2422	1	Cdk2
NM_007668	NM_007668	chr5	24418242	24423530	-	2044	1	Cdk5
NM_009871	NM_009871	chr11	80477046	80481179	+	4131	1	Cdk5r1
NM_009874	NM_009874	chr13	100697025	100730942	-	7583	1	Cdk7
NM_021273	NM_021273	chr12	111669355	111672338	-	1468	1	Ckb
NM_023671	NM_023671	chr7	97696657	97720793	+	3386	1	Clns1a
NM_009904	NM_009904	chr8	83389891	83426829	+	2261	1	Clgn
NM_007715	NM_007715	chr5	76209868	76304548	-	9762	1	Clock
NM_009908	NM_009908	chr6	142756686	142775714	+	1750	1	Cmas
NM_013493	NM_013493	chr6	87842615	87851106	-	2171	1	Cnbp
NM_009922	NM_009922	chr9	22099253	22109221	+	1978	1	Cnn1
NM_007741	NM_007741	chr4	121039566	121055325	+	2712	1	Col9a2
NM_007747	NM_007747	chr9	57521232	57532426	+	685	1	Cox5a
NM_009942	NM_009942	chr1	36691487	36693388	+	563	1	Cox5b
NM_009944	NM_009944	chr7	30184171	30186030	+	360	1	Cox7a1
NR_045561	NR_045561	chr4	126024659	126044975	+	3932	1	Csf3r
NM_007792	NM_007792	chr10	110920176	110939514	+	881	1	Csrp2
NM_001244891	NM_001244891	chr2	90940397	91019497	+	7796	1	Celf1
NM_007830	NM_007830	chr1	120113280	120121096	-	581	1	Dbi
NM_010022	NM_010022	chr3	116513079	116549981	+	3279	1	Dbt
NM_001198866	NM_001198866	chr6	83165924	83200117	+	4156	1	Dctn1
NM_010046	NM_010046	chr15	76502015	76511818	-	1736	1	Dgat1
NM_007859	NM_007859	chr4	153964449	153975081	-	2039	1	Dffb
NM_010061	NM_010061	chr16	4037145	4040024	+	1294	1	Dnase1
NM_010062	NM_010062	chr8	84908624	84911461	+	1635	1	Dnase2a
NM_030238	NM_030238	chr12	110601395	110666944	+	14319	1	Dync1h1
NM_007875	NM_007875	chr9	44326845	44333600	+	1894	1	Dpagt1
NM_007879	NM_007879	chr11	3249922	3266386	-	1513	1	Drg1
NM_007888	NM_007888	chr11	70000626	70010109	+	2918	1	Dvl2
NM_007892	NM_007892	chr3	14578671	14606309	+	1739	1	E2f5
NM_026114	NM_026114	chr12	78862072	78887010	+	3142	1	Eif2s1
NM_001127356	NM_001127356	chr5	31187558	31193139	-	2087	1	Eif2b4
NM_007922	NM_007922	chrX	20933395	20950608	-	3540	1	Elk1
NM_007927	NM_007927	chrX	74254687	74257893	+	1593	1	Emd
NM_007931	NM_007931	chr2	30171524	30174069	+	1027	1	Endog
NM_007949	NM_007949	chr7	19382039	19395692	+	3522	1	Ercc2
NR_015349	NR_015349	chr13	59769966	59773680	+	3133	1	Etohd2
NM_024166	NM_024166	chr5	129881161	129887470	-	904	1	Chchd2
NM_010185	NM_010185	chr1	171229572	171234349	-	651	1	Fcer1g
NM_010191	NM_010191	chr14	63145151	63179578	-	3685	1	Fdft1
NM_010192	NM_010192	chr17	56256793	56263608	+	6813	1	Fem1a
NM_001271614	NM_001271614	chr19	10199132	10203943	-	2207	1	Fen1
NM_008014	NM_008014	chr5	31202668	31220545	-	2153	1	Ppm1g
NM_010223	NM_010223	chr8	70527743	70535328	+	1690	1	Fkbp8
NM_013520	NM_013520	chr7	45131189	45136432	-	1064	1	Flt3l
NM_008033	NM_008033	chr8	25998722	26015601	-	1870	1	Fnta
NM_008043	NM_008043	chr19	41829970	41832583	+	2611	1	Frat1
NM_001293630	NM_001293630	chr9	44397095	44402968	+	2337	1	Slc37a4
NM_001271467	NM_001271467	chr2	126628907	126675592	-	2796	1	Gabpb1
NM_008085	NM_008085	chr7	30729779	30739407	-	1463	1	Gapdhs
NM_008095	NM_008095	chr5	129725075	129758325	+	2086	1	Gbas
NM_010259	NM_010259	chr3	142594847	142619176	+	2807	1	Gbp2b
NM_015740	NM_015740	chr10	128919914	128923524	-	544	1	Bloc1s1
NM_020004	NM_020004	chr11	100704746	100712467	-	3028	1	Kat2a
NM_013528	NM_013528	chr6	87042846	87092207	+	6227	1	Gfpt1
NM_008131	NM_008131	chr1	153899929	153909723	+	2798	1	Glul
NM_024284	NM_024284	chr17	24850490	24864450	+	1180	1	Hagh
NM_010306	NM_010306	chr3	108107275	108146152	-	3262	1	Gnai3
NM_010322	NM_010322	chr8	124863033	124890057	+	2966	1	Gnpat
NM_010331	NM_010331	chr15	76331294	76334899	+	2022	1	Gpaa1
NM_008156	NM_008156	chr13	24943152	24991936	+	4631	1	Gpld1
NM_008163	NM_008163	chr11	115644045	115708597	-	2701	1	Grb2
NM_008175	NM_008175	chr11	102430322	102436809	+	2318	1	Grn
NM_008187	NM_008187	chr8	95420250	95434869	-	1286	1	Cfap20
NR_027010	NR_027010	chr6	113067429	113077244	-	600	1	Gt(ROSA)26Sor
NM_001159410	NM_001159410	chr11	59183855	59187741	-	925	1	Guk1
NM_010390	NM_010390	chr17	35320558	35325099	+	2014	1	H2-Q1
NM_008211	NM_008211	chr11	116021961	116024504	-	1987	1	H3f3b
NM_010411	NM_010411	chr18	37936971	37954988	-	1988	1	Hdac3
NM_010413	NM_010413	chrX	7930122	7947889	-	4111	1	Hdac6
NM_008231	NM_008231	chr3	87906321	87916132	+	2237	1	Hdgf
NM_010440	NM_010440	chr10	81346046	81350427	-	1618	1	Hmg20b
NM_145998	NM_145998	chr7	131554062	131556582	+	1665	1	Hmx2
NM_001039129	NM_001039129	chr15	103240397	103244962	+	1947	1	Hnrnpa1
NM_008296	NM_008296	chr15	76477445	76500972	+	2004	1	Hsf1
NM_010489	NM_010489	chr9	107569163	107572778	+	1843	1	Hyal2
NM_008339	NM_008339	chr11	106311341	106314562	-	1223	1	Cd79b
NM_008368	NM_008368	chr15	78480549	78495066	-	2684	1	Il2rb
NM_008378	NM_008378	chr18	12972252	12992948	+	3419	1	Impact
NM_010565	NM_010565	chr10	127356326	127370544	-	1964	1	Inhbc
NM_008385	NM_008385	chr4	124741850	124801511	+	3783	1	Inpp5b
NM_001159417	NM_001159417	chr14	55603985	55610030	+	2533	1	Irf9
NM_001082960	NM_001082960	chr7	128062640	128118491	+	4650	1	Itgam
NM_025922	NM_025922	chr2	130667841	130681614	+	1149	1	Itpa
NM_008435	NM_008435	chr2	164163619	164171113	-	2706	1	Kcns1
NM_010615	NM_010615	chr19	37376403	37421859	+	4795	1	Kif11
NM_010635	NM_010635	chr8	84901928	84905295	+	1529	1	Klf1
NM_008466	NM_008466	chr14	61365186	61439947	-	4148	1	Kpna3
NM_008468	NM_008468	chr4	129643979	129672767	-	5695	1	Kpna6
NM_010684	NM_010684	chr8	13159135	13175338	+	2244	1	Lamp1
NM_010689	NM_010689	chr7	126363828	126369534	-	1220	1	Lat
NM_010716	NM_010716	chr11	82781109	82804274	+	5949	1	Lig3
NM_010720	NM_010720	chr18	74939322	74961263	-	3775	1	Lipg
NM_010734	NM_010734	chr17	35185095	35188440	-	410	1	Lst1
NM_001276446	NM_001276446	chr4	62505984	62519909	-	4433	1	Alad
NM_010749	NM_010749	chr6	122309010	122317677	+	2213	1	M6pr
NM_008537	NM_008537	chr15	10981756	10996624	+	2568	1	Amacr
NM_010755	NM_010755	chr15	79347520	79359076	+	1953	1	Maff
NR_104306	NR_104306	chr11	32231963	32267707	-	3071	1	Nprl3
NM_010769	NM_010769	chr4	130944385	130955476	+	1992	1	Matn1
NM_013594	NM_013594	chr18	74268288	74282684	+	2655	1	Mbd1
NM_008563	NM_008563	chr1	20803014	20820213	-	2867	1	Mcm3
NM_008565	NM_008565	chr16	15623897	15637400	-	3571	1	Mcm4
NM_008575	NM_008575	chr1	132986105	133025416	-	7284	1	Mdm4
NM_010787	NM_010787	chr17	46681121	46683126	+	871	1	Mea1
NM_008594	NM_008594	chr7	79133768	79149060	-	2114	1	Mfge8
NM_026810	NM_026810	chr9	111228228	111271608	-	2577	1	Mlh1
NM_008605	NM_008605	chr9	7347374	7360461	+	3595	1	Mmp12
NM_019471	NM_019471	chr9	7502342	7510242	+	1722	1	Mmp10
NM_010811	NM_010811	chr14	20723730	20734562	-	3890	1	Ndst2
NM_008615	NM_008615	chr9	86581363	86695914	-	3241	1	Me1
NM_020021	NM_020021	chr4	3870658	3872105	-	1445	1	Mos
NM_010829	NM_010829	chr13	92211881	92355003	-	3919	1	Msh3
NM_031189	NM_031189	chr1	134290004	134292548	+	1475	1	Myog
NM_001113199	NM_001113199	chr10	128035346	128048637	+	7023	1	Naca
NM_010878	NM_010878	chr9	100495003	100546053	-	1679	1	Nck1
NM_010886	NM_010886	chr6	11900373	11907446	-	486	1	Ndufa4
NM_010887	NM_010887	chr13	114287795	114388094	-	1527	1	Ndufs4
NM_010909	NM_010909	chr17	35220175	35235815	-	1464	1	Nfkbil1
NM_010925	NM_010925	chr10	78400362	78413043	-	1993	1	Rrp1
NM_010926	NM_010926	chr8	120653914	120668112	-	4926	1	Emc8
NM_001252282	NM_001252282	chr11	6291597	6359094	+	6634	1	Ogdh
NM_010957	NM_010957	chr6	113326976	113334186	+	1534	1	Ogg1
NM_011014	NM_011014	chr4	41738493	41741359	-	1634	1	Sigmar1
NM_001013365	NM_001013365	chr11	4236785	4241026	+	1902	1	Osm
NM_011026	NM_011026	chr5	122707544	122729738	+	2688	1	P2rx4
NM_019788	NM_019788	chr2	122738505	122749487	+	3487	1	Bloc1s6
NR_037610	NR_037610	chr11	74673949	74723858	-	5779	1	Pafah1b1
NM_008775	NM_008775	chr9	45965311	45984871	-	4233	1	Pafah1b2
NM_008799	NM_008799	chr17	15521575	15527301	-	1112	1	Pdcd2
NM_011066	NM_011066	chr1	91415982	91459328	-	5812	1	Per2
NM_145122	NM_145122	chr2	92375239	92381220	+	1449	1	Pex16
NM_008822	NM_008822	chr10	19860090	19907674	-	1882	1	Pex7
NM_008847	NM_008847	chr3	95058530	95106930	-	3656	1	Pip5k1a
NM_008854	NM_008854	chr8	83972978	83996442	+	2278	1	Prkaca
NM_172695	NM_172695	chr4	94565139	94603247	-	6799	1	Plaa
NM_011113	NM_011113	chr7	24462500	24475873	+	1387	1	Plaur
NM_011119	NM_011119	chr10	128557766	128565934	-	2418	1	Pa2g4
NM_011121	NM_011121	chr7	122159435	122169884	+	2202	1	Plk1
NM_008883	NM_008883	chrX	74329066	74344689	+	6908	1	Plxna3
NM_011130	NM_011130	chr8	22628119	22653437	-	1211	1	Polb
NM_138945	NM_138945	chr18	42394597	42396093	+	1142	1	Pou4f3
NM_001080118	NM_001080118	chr11	98153661	98193293	-	6499	1	Med1
NM_001038492	NM_001038492	chr2	164832872	164841032	+	3531	1	Ctsa
NM_011149	NM_011149	chr9	66060169	66066629	+	953	1	Ppib
NM_021880	NM_021880	chr11	109650921	109669663	+	3353	1	Prkar1a
NM_011163	NM_011163	chr17	78852550	78882572	-	4308	1	Eif2ak2
NM_011178	NM_011178	chr10	79879667	79883172	+	963	1	Prtn3
NM_019412	NM_019412	chr7	27499324	27520041	+	5252	1	Prx
NM_008945	NM_008945	chr3	94884324	94886958	-	940	1	Psmb4
NM_011186	NM_011186	chr14	54614120	54617995	-	866	1	Psmb5
NM_008948	NM_008948	chr2	91054016	91059438	+	1621	1	Psmc3
NM_008991	NM_008991	chr3	121758910	121815215	-	3374	1	Abcd3
NM_008996	NM_008996	chr11	20201602	20226856	+	2649	1	Rab1a
NM_009007	NM_009007	chr5	143505481	143527993	-	2261	1	Rac1
NM_009012	NM_009012	chr11	53649519	53707319	-	5126	1	Rad50
NM_011234	NM_011234	chr2	119112817	119136070	+	2126	1	Rad51
NM_009013	NM_009013	chr6	126923419	126939555	-	1824	1	Rad51ap1
NM_001166381	NM_001166381	chr6	119902698	119922823	+	1684	1	Rad52
NM_009391	NM_009391	chr5	129020156	129024321	+	2279	1	Ran
NM_001290122	NM_001290122	chr19	4784293	4794009	-	2568	1	Rbm4
NM_029169	NM_029169	chr9	107773559	107872819	-	3966	1	Rbm6
NM_023131	NM_023131	chr19	4622551	4625617	-	1437	1	Rce1
NM_009041	NM_009041	chr9	52047941	52088738	+	4547	1	Rdx
NM_053075	NM_053075	chr5	24802823	24842361	-	1511	1	Rheb
NM_009066	NM_009066	chr17	34020792	34024680	-	2025	1	Ring1
NM_009078	NM_009078	chr11	98026924	98030493	+	744	1	Rpl19
NM_009083	NM_009083	chr15	34440508	34443225	-	569	1	Rpl30
NM_172086	NM_172086	chr6	115805514	115808743	-	498	1	Rpl32
NM_011293	NM_011293	chr5	136116691	136122947	+	580	1	Polr2j
NM_009095	NM_009095	chr7	12922311	12926686	+	732	1	Rps5
NM_011300	NM_011300	chr12	28630847	28635953	-	952	1	Rps7
NM_001205215	NM_001205215	chr17	34032350	34038403	+	2344	1	Rxrb
NM_011316	NM_011316	chr7	46727999	46732543	-	2027	1	Saa4
NM_009120	NM_009120	chr10	61680321	61693297	+	2593	1	Sar1a
NM_011327	NM_011327	chr4	108043830	108118547	-	2646	1	Scp2
NM_198885	NM_198885	chr15	76457438	76459468	+	1132	1	Scx
NM_009139	NM_009139	chr11	83587886	83593087	-	1430	1	Ccl6
NM_009150	NM_009150	chr3	94933083	94944758	+	1671	1	Selenbp1
NM_011353	NM_011353	chr13	100108019	100114233	+	584	1	Serf1
NM_011358	NM_011358	chr11	116849897	116853094	-	1898	1	Srsf2
NM_013664	NM_013664	chr17	56016750	56036637	-	2063	1	Sh3gl1
NM_009193	NM_009193	chr5	33640055	33652574	-	1896	1	Slbp
NM_011396	NM_011396	chr11	53864542	53891703	-	3093	1	Slc22a5
NM_009204	NM_009204	chr11	69942286	69948190	-	2809	1	Slc2a4
NM_011419	NM_011419	chrY	897788	943811	+	5443	1	Kdm5d
NM_133854	NM_133854	chr3	90488026	90491013	-	1910	1	Snapin
NM_011432	NM_011432	chr17	27840087	27851967	+	752	1	Snrpc
NM_011434	NM_011434	chr16	90220742	90226324	+	641	1	Sod1
NM_011460	NM_011460	chr13	33192959	33203980	+	2092	1	Serpinb9d
NM_009261	NM_009261	chr2	37569868	37647285	-	16329	1	Strbp
NM_020493	NM_020493	chr17	46546839	46556162	-	4084	1	Srf
NM_009272	NM_009272	chr4	148591513	148594619	+	1319	1	Srm
NM_001110145	NM_001110145	chr2	69861562	69871846	+	2047	1	Ssb
NM_011482	NM_011482	chr15	82041345	82047598	-	1252	1	Nhp2l1
NM_019963	NM_019963	chr10	128270576	128292849	+	4368	1	Stat2
NM_009289	NM_009289	chr19	47580019	47645246	+	7009	1	Slk
NM_011497	NM_011497	chr2	172356190	172370570	-	1964	1	Aurka
NM_016801	NM_016801	chr5	135023572	135051099	+	2059	1	Stx1a
NM_011514	NM_011514	chrX	8061171	8074760	-	3108	1	Suv39h1
NM_009315	NM_009315	chr5	138178617	138187186	-	2247	1	Taf6
NM_009325	NM_009325	chr10	81328703	81335174	+	1943	1	Tbxa2r
NM_011550	NM_011550	chr11	101087290	101092207	+	1965	1	Mlx
NM_009343	NM_009343	chr17	26933127	26937908	+	2430	1	Phf1
NM_009352	NM_009352	chr1	15805646	15844052	+	2256	1	Terf1
NM_009358	NM_009358	chr17	46682991	46705002	-	2909	1	Ppp2r5d
NM_019678	NM_019678	chr16	56690329	56717450	-	1938	1	Tfg
NM_011577	NM_011577	chr7	25687002	25705077	+	2166	1	Tgfb1
NM_011585	NM_011585	chr6	86404219	86433405	+	4462	1	Tia1
NM_009383	NM_009383	chr7	128439777	128461513	-	4278	1	Tial1
NM_011588	NM_011588	chr7	13024152	13031032	+	3223	1	Trim28
NM_011589	NM_011589	chr10	128238066	128252941	+	4371	1	Timeless
NM_001044384	NM_001044384	chrX	20870166	20874737	+	882	1	Timp1
NM_011596	NM_011596	chr5	124629052	124724455	+	5323	1	Atp6v0a2
NM_009386	NM_009386	chr7	65296165	65371244	-	7024	1	Tjp1
NM_009387	NM_009387	chr11	117815519	117826014	-	1360	1	Tk1
NM_011602	NM_011602	chr4	43531513	43562583	-	8501	1	Tln1
NM_011624	NM_011624	chr16	16870891	16892986	+	2939	1	Top3b
NM_021884	NM_021884	chr7	46889027	46919930	-	1820	1	Tsg101
NM_031201	NM_031201	chr15	75924683	75929730	-	1299	1	Tsta3
NM_011660	NM_011660	chr4	57943373	57956411	-	1044	1	Txn1
NM_011664	NM_011664	chr11	62551171	62553213	+	1495	1	Ubb
NM_009462	NM_009462	chr8	119910360	119957559	+	3714	1	Usp10
NM_013700	NM_013700	chr6	124815019	124829447	-	3154	1	Usp5
NM_009466	NM_009466	chr5	65413222	65435842	-	2428	1	Ugdh
NM_011678	NM_011678	chr9	108347831	108392529	+	3644	1	Usp4
NM_009479	NM_009479	chr7	133686355	133709295	-	1774	1	Uros
NM_011695	NM_011695	chr14	21831561	21845879	+	1650	1	Vdac2
NM_011697	NM_011697	chr19	6982472	6987651	-	1273	1	Vegfb
NM_011699	NM_011699	chr2	109890878	109900936	+	4129	1	Lin7c
NM_016757	NM_016757	chr6	83119044	83121461	-	1314	1	Wbp1
NM_001163633	NM_001163633	chr15	85535437	85580729	-	3404	1	Wnt7b
NM_011728	NM_011728	chr4	46175222	46196311	-	947	1	Xpa
NM_194333	NM_194333	chr1	75125542	75133890	-	2044	1	Slc23a3
NM_011747	NM_011747	chr17	23575852	23599487	-	2131	1	Zfp13
NM_001286726	NM_001286726	chr17	36837146	36859398	+	3223	1	Trim26
NM_011760	NM_011760	chr17	21423227	21435384	+	2530	1	Zfp54
NM_001024846	NM_001024846	chr11	49203500	49218816	+	4020	1	Zfp62
NM_009567	NM_009567	chr7	24270418	24277794	+	3504	1	Zfp93
NM_001042438	NM_001042438	chr15	58047003	58076508	-	5224	1	Zhx1
NM_019927	NM_019927	chr9	59388554	59486374	-	6419	1	Arih1
NM_011791	NM_011791	chr8	25816001	25840787	-	3284	1	Ash2l
NM_011796	NM_011796	chr1	92934408	92947948	+	2863	1	Capn10
NM_011801	NM_011801	chr8	111768473	111854310	-	1206	1	Cfdp1
NM_001253784	NM_001253784	chr8	123442956	123463899	+	3858	1	Def8
NM_011806	NM_011806	chr5	9118868	9161776	-	3719	1	Dmtf1
NM_011814	NM_011814	chr11	69632971	69653297	+	2951	1	Fxr2
NM_011819	NM_011819	chr8	70629394	70631635	-	1080	1	Gdf15
NM_011835	NM_011835	chr10	7726000	7763150	+	1762	1	Katna1
NM_011836	NM_011836	chr2	31887281	31946535	+	5900	1	Lamc3
NM_001291037	NM_001291037	chr11	61488812	61494266	-	3246	1	Mapk7
NM_011842	NM_011842	chr19	8941920	8952300	+	3067	1	Mta2
NM_011848	NM_011848	chr8	22128283	22166435	-	2026	1	Nek3
NM_023371	NM_023371	chr9	20652130	20666584	+	3802	1	Pin1
NM_011871	NM_011871	chr2	76629937	76647994	-	1544	1	Prkra
NM_022813	NM_022813	chr9	57560944	57588798	+	2331	1	Scamp2
NM_023059	NM_023059	chr7	141091175	141100546	-	1978	1	Sigirr
NM_011899	NM_011899	chr12	55080496	55115367	+	4246	1	Srp54a
NM_015752	NM_015752	chr19	46396896	46488804	+	4511	1	Sufu
NM_001083921	NM_001083921	chr2	152316334	152332425	-	2383	1	Rbck1
NM_011930	NM_011930	chr17	25133394	25162099	+	4036	1	Clcn7
NM_007953	NM_007953	chr19	6910977	6921808	-	2233	1	Esrra
NM_023138	NM_023138	chr10	81105947	81124697	+	2360	1	Map2k2
NM_009006	NM_009006	chr19	6341160	6355619	+	4614	1	Map4k2
NM_016700	NM_016700	chr14	33377899	33447158	-	5741	1	Mapk8
NM_011955	NM_011955	chr16	10411938	10424425	+	2115	1	Nubp1
NM_019834	NM_019834	chr5	114727408	114773491	-	5006	1	Git2
NM_011967	NM_011967	chr3	108256926	108279952	+	1206	1	Psma5
NM_011992	NM_011992	chr9	56041845	56059083	+	2033	1	Rcn2
NR_102282	NR_102282	chr1	10024600	10038159	-	1731	1	Cops5
NM_011997	NM_011997	chr4	32615473	32653265	+	6791	1	Casp8ap2
NM_012003	NM_012003	chr6	124958807	124965397	-	1765	1	Cops7a
NM_026794	NM_026794	chr9	121710389	121712921	+	512	1	Deb1
NM_012012	NM_012012	chr1	175880778	175911396	+	5489	1	Exo1
NM_012039	NM_012039	chr9	49055581	49078773	+	2878	1	Zw10
NM_023314	NM_023314	chr1	87213914	87240488	+	3385	1	Eif4e2
NM_177461	NM_177461	chr15	79108983	79136901	+	6676	1	Micall1
NM_013752	NM_013752	chr4	15957967	15992589	+	2473	1	Nbn
NM_013755	NM_013755	chr3	20122084	20155116	-	1712	1	Gyg
NM_013855	NM_013855	chr17	24352023	24410204	+	6444	1	Abca3
NM_001045864	NM_001045864	chr17	34850391	34856372	+	1597	1	Nelfe
NM_001110101	NM_001110101	chr17	34981854	34985893	+	861	1	Lsm2
NM_145620	NM_145620	chr9	106477309	106485415	+	1520	1	Rrp9
NM_138585	NM_138585	chr8	72460483	72475233	-	3780	1	Cherp
NM_178600	NM_178600	chr7	127893063	127895617	-	743	1	Vkorc1
NR_104358	NR_104358	chr7	25659153	25668032	+	1104	1	Exosc5
NM_138593	NM_138593	chr3	127536714	127553349	-	2106	1	Larp7
NM_138598	NM_138598	chr11	113661319	113684151	-	2610	1	Fam104a
NM_145705	NM_145705	chr14	55679080	55681817	-	1728	1	Tinf2
NM_013859	NM_013859	chr19	6061207	6062468	+	1259	1	Znhit2
NM_013876	NM_013876	chr4	109452857	109476505	-	2127	1	Rnf11
NM_013881	NM_013881	chr11	61775598	61855092	-	5784	1	Ulk2
NM_013901	NM_013901	chr3	90248192	90253612	+	2338	1	Slc39a1
NM_009668	NM_009668	chr18	32377217	32435740	+	2434	1	Bin1
NM_015774	NM_015774	chr14	45283087	45318572	-	4400	1	Ero1l
NM_181586	NM_181586	chr10	81621786	81627608	-	1693	1	Sirt6
NM_015789	NM_015789	chr7	45207525	45211883	-	896	1	Dkkl1
NM_015824	NM_015824	chr4	34566781	34614942	-	6291	1	Orc3
NM_015827	NM_015827	chr9	98563731	98588375	+	3019	1	Copb2
NM_015830	NM_015830	chr17	25959556	25965505	-	3276	1	Capn15
NM_016962	NM_016962	chr17	74338987	74391113	+	4674	1	Spast
NM_016699	NM_016699	chr4	148558427	148582400	+	2764	1	Exosc10
NM_016772	NM_016772	chr7	28825338	28832239	+	1126	1	Ech1
NM_145528	NM_145528	chr2	91674612	91710592	-	3555	1	Atg13
NM_029320	NM_029320	chr14	99099424	99254494	+	3261	1	Pibf1
NM_024499	NM_024499	chr10	81044073	81060154	-	1933	1	Sgta
NM_029092	NM_029092	chr16	56033720	56037774	-	1842	1	Trmt10c
NM_199196	NM_199196	chr11	79993106	80034123	+	4355	1	Suz12
NM_025855	NM_025855	chr10	29313500	29346661	+	3040	1	Echdc1
NM_026107	NM_026107	chr11	65807175	65829239	+	2361	1	Zkscan6
NM_181424	NM_181424	chr2	180070593	180085902	+	1687	1	Mtg2
NM_026638	NM_026638	chr7	126975914	126980501	+	2305	1	Cdipt
NM_177472	NM_177472	chr16	3979106	4001678	-	5704	1	Slx4
NM_016798	NM_016798	chr8	45885485	45919546	+	1569	1	Pdlim3
NM_001098227	NM_001098227	chr4	6365680	6396122	+	2542	1	Sdcbp
NM_016806	NM_016806	chr6	51460435	51469894	-	2251	1	Hnrnpa2b1
NM_016906	NM_016906	chr6	88503607	88518800	-	3025	1	Sec61a1
NM_015785	NM_015785	chr11	11280040	11462419	-	3835	1	Zpbp
NM_016800	NM_016800	chr12	79156017	79172458	-	1273	1	Vti1b
NM_019693	NM_019693	chr17	35241746	35253707	+	1726	1	Ddx39b
NM_017381	NM_017381	chr3	157534397	157548339	+	2604	1	Zranb2
NM_017391	NM_017391	chr16	92058322	92087473	+	10909	1	Slc5a3
NM_016912	NM_016912	chr5	92006074	92043042	-	4050	1	Cdkl2
NM_016918	NM_016918	chr2	5845034	5868736	+	1578	1	Nudt5
NM_016860	NM_016860	chr19	46376814	46395735	-	2729	1	Actr1a
NM_019396	NM_019396	chr15	76643395	76660208	-	4099	1	Cyhr1
NM_017472	NM_017472	chr10	42502054	42535369	+	1371	1	Snx3
NM_019422	NM_019422	chr4	118428093	118432952	+	1800	1	Elovl1
NM_018740	NM_018740	chr11	69968226	69981235	-	1424	1	Elp5
NM_018757	NM_018757	chr9	109832794	109842961	+	1016	1	Nme6
NM_018817	NM_018817	chr1	72583251	72636790	+	6696	1	Smarcal1
NM_018742	NM_018742	chr7	140853384	140856383	-	1546	1	Bet1l
NM_023764	NM_023764	chr7	141881585	141902406	-	3697	1	Tollip
NM_018786	NM_018786	chr15	99295409	99317007	+	3131	1	Prpf40b
NM_133991	NM_133991	chrX	8238668	8252406	-	3410	1	Ftsj1
NM_001290455	NM_001290455	chrX	7789993	7820567	+	2993	1	Gripap1
NM_018889	NM_018889	chr9	73015696	73039699	-	2179	1	Pigb
NM_018868	NM_018868	chr1	59685006	59711510	+	1959	1	Nop58
NM_019491	NM_019491	chr13	17880575	17944217	-	2655	1	Rala
NM_019542	NM_019542	chr6	83795057	83802556	+	1318	1	Nagk
NM_019551	NM_019551	chr13	24831659	24842153	+	1968	1	Tdp2
NM_019552	NM_019552	chr8	123952459	123983122	-	4291	1	Abcb10
NM_019575	NM_019575	chr10	80602882	80615783	+	1793	1	Scamp4
NM_019578	NM_019578	chr4	134356373	134372547	-	4101	1	Extl1
NM_027204	NM_027204	chr11	120484669	120488754	+	942	1	Mrpl12
NM_019726	NM_019726	chr11	69914192	69916591	+	1208	1	Gps2
NM_019747	NM_019747	chr5	138139702	138155744	-	6463	1	Zfp113
NM_019667	NM_019667	chr2	52692206	52742149	-	4108	1	Stam2
NM_019722	NM_019722	chr19	6134389	6141137	-	862	1	Arl2
NM_019821	NM_019821	chr5	114669500	114690935	-	1604	1	Gltp
NM_019720	NM_019720	chr9	107539011	107541865	-	1777	1	Cyb561d2
NM_019757	NM_019757	chr10	81366879	81378370	-	2238	1	Fzr1
NM_019829	NM_019829	chr19	8741803	8755642	+	2100	1	Stx5a
NM_019674	NM_019674	chr7	126785868	126792471	-	1321	1	Ppp4c
NM_001199045	NM_001199045	chr11	86544991	86567360	+	2058	1	Tubd1
NM_019758	NM_019758	chr2	90847155	90866634	+	2405	1	Mtch2
NM_019822	NM_019822	chr2	180171588	180176283	+	1417	1	Adrm1
NM_019662	NM_019662	chr8	104628066	104631321	-	1568	1	Rrad
NM_019760	NM_019760	chr10	57515775	57532529	-	2867	1	Serinc1
NM_019785	NM_019785	chr12	70937857	70964717	+	4006	1	Actr10
NM_026446	NM_026446	chr2	181688419	181693977	-	1506	1	Rgs19
NM_019749	NM_019749	chr11	69991370	69994949	+	1116	1	Gabarap
NM_019806	NM_019806	chr2	173737571	173784336	+	6961	1	Vapb
NM_019941	NM_019941	chr7	24134163	24143241	+	3446	1	Zfp235
NM_019953	NM_019953	chr10	128322459	128327187	+	1009	1	Cnpy2
NM_001163780	NM_001163780	chr9	78109192	78172109	+	6695	1	Ick
NM_019924	NM_019924	chr19	6829084	6840627	-	3112	1	Rps6ka4
NM_001039509	NM_001039509	chr1	74285034	74353692	+	2944	1	Pnkd
NM_019921	NM_019921	chr11	61871307	61930257	-	3862	1	Akap10
NM_020003	NM_020003	chr3	88325023	88328631	+	1529	1	Glmp
NM_020035	NM_020035	chr4	43017626	43025774	-	4254	1	Pigo
NM_019988	NM_019988	chr17	24473550	24479078	-	3350	1	Mlst8
NM_001164621	NM_001164621	chr18	38296805	38317849	+	3341	1	Rnf14
NM_019976	NM_019976	chr3	108383838	108388231	+	1729	1	Psrc1
NM_001204129	NM_001204129	chr11	118428457	118451782	+	4387	1	C1qtnf1
NM_020050	NM_020050	chr7	109735836	109752263	-	1678	1	Tmem9b
NM_020285	NM_020285	chr7	143069368	143071087	+	1389	1	Tssc4
NM_020271	NM_020271	chr15	78913919	78919517	+	1997	1	Pdxp
NM_020490	NM_020490	chr14	55761428	55763229	+	1435	1	Ltb4r2
NM_020508	NM_020508	chr17	32196272	32284133	-	5926	1	Brd4
NM_020580	NM_020580	chr2	174415804	174427502	+	2262	1	Nelfcd
NM_020611	NM_020611	chr5	76140273	76155503	+	1761	1	Srd5a3
NM_020619	NM_020619	chr6	83115506	83118898	+	2764	1	Mogs
NM_020594	NM_020594	chr2	128926268	128944020	-	1556	1	Zc3h8
NM_020570	NM_020570	chr5	25689816	25705797	-	3210	1	Xrcc2
NM_001042485	NM_001042485	chr1	134346097	134361999	-	3156	1	Tmem183a
NM_001190870	NM_001190870	chr7	100178683	100184869	+	1327	1	Kcne3
NM_021310	NM_021310	chr13	93430097	93499808	-	8767	1	Jmy
NM_019507	NM_019507	chr11	97098007	97115331	-	2544	1	Tbx21
NM_175098	NM_175098	chr6	49319274	49341586	+	2350	1	Ccdc126
NM_133934	NM_133934	chr6	87818448	87838759	-	1606	1	Isy1
NM_021383	NM_021383	chr1	74506060	74530842	+	3256	1	Rqcd1
NM_021393	NM_021393	chr2	25199712	25211489	-	2622	1	Nelfb
NM_021419	NM_021419	chr17	29614789	29641664	+	2068	1	Rnf8
NM_021450	NM_021450	chr2	126791558	126876261	-	7104	1	Trpm7
NM_021501	NM_021501	chr10	81153966	81167720	-	1655	1	Pias4
NM_021519	NM_021519	chr2	25557900	25562082	+	662	1	Edf1
NM_021538	NM_021538	chr8	70302785	70312990	+	1021	1	Cope
NM_021549	NM_021549	chr7	44857146	44862929	+	2116	1	Pnkp
NM_021559	NM_021559	chr18	24012267	24020771	-	3122	1	Zfp24
NM_025875	NM_025875	chr3	96629928	96633791	+	2605	1	Rbm8a
NM_019811	NM_019811	chr2	155518043	155562743	+	2813	1	Acss2
NM_022028	NM_022028	chr12	69965013	69987002	-	2516	1	Sav1
NM_022324	NM_022324	chr16	17130138	17132383	-	1103	1	Sdf2l1
NM_025474	NM_025474	chr1	160195260	160201186	+	1965	1	Mrps14
NM_022724	NM_022724	chr2	3455815	3474986	-	4274	1	Suv39h2
NM_022887	NM_022887	chr2	28641233	28691172	+	7658	1	Tsc1
NM_022889	NM_022889	chr11	3963975	3980004	+	2894	1	Pes1
NM_001193659	NM_001193659	chr5	5505015	5514849	-	3798	1	Cldn12
NM_022891	NM_022891	chr11	97777526	97782439	-	1055	1	Rpl23
NM_022981	NM_022981	chr7	12834810	12850584	+	3539	1	Zfp110
NM_023045	NM_023045	chr14	70654246	70766628	-	15088	1	Xpo7
NM_023063	NM_023063	chr15	99778468	99820149	-	4107	1	Lima1
NM_025317	NM_025317	chr10	81264722	81266926	-	582	1	Mrpl54
NM_025324	NM_025324	chr7	5015508	5018488	+	1101	1	Zfp524
NM_025329	NM_025329	chr16	32419702	32428892	+	624	1	Tctex1d2
NM_025332	NM_025332	chr16	44738879	44746363	-	1296	1	Gtpbp8
NM_001035123	NM_001035123	chr8	95715913	95719004	+	1660	1	Setd6
NM_001081108	NM_001081108	chr5	138255482	138259395	+	871	1	Lamtor4
NM_001205071	NM_001205071	chr7	44467980	44471658	+	932	1	Josd2
NM_170777	NM_170777	chr9	22112989	22114169	-	1049	1	Elof1
NM_025372	NM_025372	chr9	64281607	64304792	+	1201	1	Tipin
NM_025381	NM_025381	chr6	29467783	29470509	+	631	1	Atp6v1f
NM_197979	NM_197979	chr11	4701968	4704344	-	437	1	Uqcr10
NM_023167	NM_023167	chr9	21002737	21008837	+	1276	1	Mrpl4
NM_001294269	NM_001294269	chr8	71592184	71596267	+	1160	1	Pgls
NM_025400	NM_025400	chr11	115182832	115187316	-	1121	1	Nat9
NM_025411	NM_025411	chr4	135975602	135987244	-	1530	1	Pithd1
NM_025412	NM_025412	chr15	75916463	75921560	-	1345	1	Pycrl
NM_025417	NM_025417	chr9	57155041	57158299	-	814	1	Commd4
NM_025419	NM_025419	chr9	122945089	122951000	-	3356	1	1110059G10Rik
NM_025428	NM_025428	chr2	30090944	30093635	-	1187	1	Zdhhc12
NM_133676	NM_133676	chr14	50915374	50924893	-	1595	1	Osgep
NM_025450	NM_025450	chr5	129715528	129718691	+	1190	1	Mrps17
NM_001177945	NM_001177945	chr7	97550331	97579497	-	886	1	Aamdc
NR_104416	NR_104416	chr19	8888883	8890759	+	810	1	1810009A15Rik
NM_025468	NM_025468	chr18	65800578	65817657	+	762	1	Sec11c
NM_025471	NM_025471	chr4	34768672	34778337	-	921	1	Smim8
NM_025476	NM_025476	chr4	19575066	19606932	+	1863	1	Rmdn1
NM_001109747	NM_001109747	chr10	30196009	30200540	-	1507	1	Cenpw
NM_025492	NM_025492	chr11	83437694	83441232	+	926	1	1700020L24Rik
NM_025494	NM_025494	chr15	38661904	38692444	+	2083	1	Atp6v1c1
NM_025504	NM_025504	chr7	25619493	25625550	+	2381	1	Atp5sl
NM_025523	NM_025523	chr3	51405479	51408955	-	408	1	Ndufc1
NM_025525	NM_025525	chr12	84417200	84418578	+	1376	1	Rnf113a2
NM_025536	NM_025536	chr15	76899941	76901297	+	994	1	Commd5
NM_025538	NM_025538	chr17	56997339	56999336	+	929	1	Alkbh7
NM_133678	NM_133678	chr19	6116004	6118586	-	1371	1	Sac3d1
NM_025544	NM_025544	chr4	126046928	126055536	+	928	1	Mrps15
NM_001025444	NM_001025444	chr4	40682078	40703194	-	5544	1	Aptx
NM_025547	NM_025547	chr13	66912098	66933072	-	1473	1	Mterf3
NM_025551	NM_025551	chr10	94199009	94220948	+	555	1	Ndufa12
NM_025556	NM_025556	chr8	13884788	13890271	-	796	1	Coprs
NM_001199123	NM_001199123	chr2	69193895	69206213	-	1596	1	Spc25
NM_025566	NM_025566	chr17	56162491	56173955	+	2361	1	Tnfaip8l1
NM_025575	NM_025575	chr2	164460971	164465510	+	1602	1	Sys1
NM_025577	NM_025577	chr8	70504296	70506739	-	650	1	2810428I15Rik
NM_181392	NM_181392	chr17	6079828	6085485	+	1166	1	Gtf2h5
NM_025594	NM_025594	chr18	36793923	36799660	+	2249	1	Zmat2
NM_025605	NM_025605	chr7	101905837	101911903	+	1179	1	Lamtor1
NM_025609	NM_025609	chr15	80133154	80161702	+	2919	1	Tab1
NM_025614	NM_025614	chr10	33996555	34019616	-	1073	1	Rwdd1
NM_175109	NM_175109	chr15	80260614	80264306	-	824	1	Rps19bp1
NM_023220	NM_023220	chr2	126890395	126933235	-	5595	1	Sppl2a
NM_024176	NM_024176	chr19	5422804	5424979	-	990	1	Drap1
NM_001024385	NM_001024385	chr2	132846666	132866768	+	1898	1	Crls1
NM_025648	NM_025648	chr8	84856986	84869257	+	1814	1	Farsa
NM_025650	NM_025650	chr10	80402997	80406821	-	431	1	Uqcr11
NM_001164220	NM_001164220	chr14	61598226	61605945	+	1634	1	Trim13
NM_174874	NM_174874	chr1	93755033	93789529	+	2949	1	Atg4b
NM_025671	NM_025671	chr5	124112338	124115476	+	1539	1	Ogfod2
NM_025682	NM_025682	chr14	56722449	56778316	-	2364	1	Pspc1
NM_029663	NM_029663	chr15	75894796	75909344	-	2844	1	Eef1d
NM_025706	NM_025706	chr10	115197871	115251493	-	3760	1	Tbc1d15
NM_025783	NM_025783	chr6	71543854	71581574	+	2584	1	Chmp3
NM_025717	NM_025717	chr19	4756525	4765941	+	1824	1	Rbm4b
NM_025751	NM_025751	chr13	105082122	105121782	+	2147	1	4933425L06Rik
NM_025768	NM_025768	chr8	13176869	13200624	-	1300	1	Grtp1
NM_172396	NM_172396	chr8	72565198	72571048	-	2835	1	Smim7
NM_025798	NM_025798	chr10	30608207	30618366	-	689	1	Hint3
NM_025800	NM_025800	chr16	31251541	31275277	-	4066	1	Ppp1r2
NR_028142	NR_028142	chr7	141455188	141460743	+	2707	1	Pnpla2
NM_029979	NM_029979	chr14	66297025	66311424	+	3676	1	Trim35
NM_025808	NM_025808	chr16	17508971	17526330	+	3085	1	Lztr1
NM_025825	NM_025825	chr11	85191310	85235120	-	2390	1	Appbp2
NM_001159573	NM_001159573	chr5	74535482	74597124	+	3062	1	Fip1l1
NM_025839	NM_025839	chr16	4939111	4941028	+	1272	1	Nudt16l1
NM_025840	NM_025840	chr12	36091835	36156825	-	1857	1	Bzw2
NM_024184	NM_024184	chr8	83955694	83970195	+	1593	1	Asf1b
NM_025857	NM_025857	chr9	63602655	63641889	+	2588	1	Aagab
NM_023281	NM_023281	chr13	74322255	74350240	-	2842	1	Sdha
NM_025878	NM_025878	chr17	35910385	35916369	-	1044	1	Mrps18b
NM_080554	NM_080554	chr2	34852089	34870962	-	2030	1	Psmd5
NM_025899	NM_025899	chr7	120635189	120659523	+	1866	1	Uqcrc2
NR_037589	NR_037589	chr9	48488697	48495330	-	1909	1	Rbm7
NM_025910	NM_025910	chr16	59471775	59492451	+	2137	1	Mina
NM_025912	NM_025912	chr2	172345577	172355749	+	3600	1	Fam210b
NM_025915	NM_025915	chr11	69396516	69398234	-	1581	1	Tmem88
NM_025933	NM_025933	chr13	54590231	54591147	+	609	1	Higd2a
NM_025945	NM_025945	chr14	70438748	70443471	-	2038	1	Polr3d
NM_025947	NM_025947	chr2	155236533	155250277	+	680	1	Dynlrb1
NM_025951	NM_025951	chr5	52741574	52769344	+	3131	1	Pi4k2b
NM_001190409	NM_001190409	chrX	105968085	106011899	-	4511	1	Magt1
NM_023465	NM_023465	chr4	149518241	149566437	+	2662	1	Ctnnbip1
NM_025960	NM_025960	chr7	19508729	19516145	+	760	1	Trappc6a
NM_025962	NM_025962	chr4	116702434	116708385	-	1924	1	Mmachc
NM_025966	NM_025966	chr17	46772635	46773407	+	770	1	2310039H08Rik
NM_025974	NM_025974	chr9	120571517	120574653	+	927	1	Rpl14
NM_025976	NM_025976	chr16	13671858	13703612	+	2993	1	Bfar
NM_025977	NM_025977	chr9	21927471	21935872	+	1516	1	Ccdc159
NM_025983	NM_025983	chr2	174461075	174464101	-	409	1	Atp5e
NM_025987	NM_025987	chr15	82350139	82354291	-	555	1	Ndufa6
NM_024193	NM_024193	chr2	130274412	130279313	+	1881	1	Nop56
NM_025995	NM_025995	chr10	5799158	5805465	-	1800	1	Fbxo5
NM_026006	NM_026006	chr18	31909094	31911903	-	2807	1	Sft2d3
NM_026007	NM_026007	chr19	8967041	8978180	+	1553	1	Eef1g
NM_001081411	NM_001081411	chr3	41626705	41742514	-	2997	1	Sclt1
NM_026021	NM_026021	chr2	24949777	24960870	+	2705	1	Zmynd19
NM_026042	NM_026042	chr7	28385247	28392690	-	2156	1	Med29
NM_026045	NM_026045	chr2	4622167	4652086	-	3401	1	Prpf18
NM_024196	NM_024196	chr2	152293872	152312590	+	1926	1	Tbc1d20
NM_025695	NM_025695	chr12	11265886	11319785	+	5574	1	Smc6
NM_026064	NM_026064	chr17	70993793	71002533	-	1773	1	Myl12a
NM_026069	NM_026069	chr15	5116613	5119140	+	861	1	Rpl37
NM_001205239	NM_001205239	chr9	59617284	59650290	+	2688	1	Parp6
NR_030776	NR_030776	chr6	119848193	119849016	+	823	1	3110021A11Rik
NM_026077	NM_026077	chr7	81782187	81789453	-	850	1	3110040N11Rik
NM_026078	NM_026078	chr1	161969188	161973435	+	3297	1	Pigc
NM_001099295	NM_001099295	chr4	116173372	116174297	+	388	1	1700042G07Rik
NM_183262	NM_183262	chr2	129800517	129832285	+	6187	1	Stk35
NM_026110	NM_026110	chr16	91014037	91044379	-	3789	1	Paxbp1
NM_026116	NM_026116	chr8	94067954	94098811	-	2928	1	Bbs2
NM_026124	NM_026124	chr2	156863122	156873562	+	1044	1	1110008F13Rik
NR_028368	NR_028368	chr16	91011249	91016503	+	975	1	4930404I05Rik
NM_026129	NM_026129	chr5	121444753	121452474	-	1238	1	Erp29
NM_024200	NM_024200	chr3	32529482	32579225	+	4511	1	Mfn1
NM_026144	NM_026144	chr4	133969057	134000864	-	3099	1	Dhdds
NM_023343	NM_023343	chr1	91375831	91398783	-	1354	1	Ilkap
NM_026166	NM_026166	chr10	91083039	91098658	+	3246	1	Ikbip
NM_178375	NM_178375	chr2	164805114	164822127	+	2685	1	Zswim3
NM_026236	NM_026236	chr9	119894895	119926579	+	3800	1	Wdr48
NM_026252	NM_026252	chr11	31870940	31935635	+	7629	1	Cpeb4
NM_026272	NM_026272	chr11	121237236	121255856	+	4399	1	Narf
NM_026276	NM_026276	chr9	4294793	4309494	-	2862	1	Aasdhppt
NM_026303	NM_026303	chr9	3335231	3385846	+	2255	1	Alkbh8
NM_001166370	NM_001166370	chr19	6909698	6911026	+	1026	1	Trmt112
NR_104458	NR_104458	chr17	26937972	26939458	-	738	1	Cuta
NM_026312	NM_026312	chrX	105079756	105085194	+	2638	1	Pbdc1
NM_001134692	NM_001134692	chr5	30906516	30907788	-	637	1	Ost4
NM_026591	NM_026591	chr3	87919544	87923433	+	941	1	Mrpl24
NM_026341	NM_026341	chr14	20294690	20317575	+	2512	1	Nudt13
NM_026343	NM_026343	chr4	48124919	48186506	+	5766	1	Stx17
NM_026366	NM_026366	chr16	87354185	87368649	+	1783	1	N6amt1
NM_026377	NM_026377	chr19	47731756	47735588	+	1577	1	Sfr1
NM_026382	NM_026382	chr13	38204939	38227663	+	1778	1	Snrnp48
NM_026390	NM_026390	chr1	128244181	128279377	+	4078	1	Ubxn4
NM_026395	NM_026395	chr4	155074112	155086297	-	1509	1	Rer1
NM_026403	NM_026403	chr14	55745693	55755634	+	3816	1	Nop9
NM_026404	NM_026404	chr18	36679215	36683862	+	2838	1	Slc35a4
NM_026409	NM_026409	chr5	124552864	124569660	+	2783	1	Ddx55
NM_026417	NM_026417	chr17	74489493	74500277	+	2125	1	Yipf4
NM_001162855	NM_001162855	chr7	130532526	130547381	-	1422	1	Nsmce4a
NM_001039710	NM_001039710	chr1	55052770	55072702	+	1726	1	Coq10b
NM_024212	NM_024212	chr9	64173387	64178562	+	1410	1	Rpl4
NM_174987	NM_174987	chr8	126422501	126425435	+	759	1	Coa6
NM_018771	NM_018771	chr8	83652678	83664789	+	1607	1	Gipc1
NM_026453	NM_026453	chr8	31159468	31168724	-	1845	1	Mak16
NM_182991	NM_182991	chr8	70483867	70487358	-	1481	1	Tmem59l
NM_030241	NM_030241	chr5	124439930	124462311	+	2732	1	Setd8
NM_001164600	NM_001164600	chr15	76070182	76080870	-	1820	1	Puf60
NM_133692	NM_133692	chr7	100082113	100121500	-	2988	1	Pold3
NM_026501	NM_026501	chr11	101096516	101119824	-	3082	1	Fam134c
NM_026505	NM_026505	chr18	3507957	3516404	+	5035	1	Bambi
NM_026513	NM_026513	chr8	107046290	107048614	-	1532	1	Pdf
NM_001110197	NM_001110197	chr10	29344176	29362442	-	4398	1	Rnf146
NM_133693	NM_133693	chr7	30640995	30650228	-	1689	1	Rbm42
NM_024215	NM_024215	chr4	134243306	134245591	-	1971	1	Zfp593
NM_026532	NM_026532	chr8	105860634	105880401	+	1958	1	Nutf2
NM_001102650	NM_001102650	chr11	100429352	100441089	-	1389	1	Nt5c3b
NM_026566	NM_026566	chr15	101284301	101290934	+	1225	1	Atg101
NM_026573	NM_026573	chrX	37091678	37110322	-	2332	1	Upf3b
NM_001039824	NM_001039824	chr9	21067520	21073514	-	775	1	Fdx1l
NM_026603	NM_026603	chr5	123907275	123928832	+	2226	1	Denr
NM_026636	NM_026636	chr8	71396855	71404772	+	1581	1	Babam1
NM_024222	NM_024222	chr9	115242582	115310421	-	4202	1	Stt3b
NM_026703	NM_026703	chr2	36036334	36049292	-	733	1	Ndufa8
NM_133694	NM_133694	chr19	46328184	46330446	+	1342	1	Fbxl15
NM_026732	NM_026732	chr17	45686372	45698495	+	590	1	Mrpl14
NM_001081041	NM_001081041	chr19	6067842	6077187	-	2619	1	Vps51
NM_001144855	NM_001144855	chr1	134296783	134332928	-	6036	1	Ppfia4
NM_134142	NM_134142	chr19	10870661	10881743	-	1923	1	Tmem109
NM_026760	NM_026760	chr8	85026833	85030286	+	887	1	2310036O22Rik
NM_199007	NM_199007	chr1	57995974	58026277	+	5303	1	Sgol2a
NM_026729	NM_026729	chr11	115403766	115410913	+	726	1	Ict1
NM_172400	NM_172400	chr4	132535559	132553742	+	1381	1	Dnajc8
NM_001110271	NM_001110271	chr9	106440051	106447678	-	1372	1	Abhd14a
NM_001085410	NM_001085410	chr15	9071260	9110496	+	3724	1	Nadk2
NM_001081196	NM_001081196	chr19	8819401	8834142	+	5710	1	Hnrnpul2
NM_028390	NM_028390	chr9	22331214	22389206	-	5395	1	Anln
NM_144525	NM_144525	chr5	30869647	30877467	+	2743	1	Tmem214
NM_026851	NM_026851	chr14	54426909	54429750	+	405	1	Mrpl52
NR_037954	NR_037954	chr16	24392556	24393655	-	852	1	Lppos
NM_026868	NM_026868	chr8	9977717	9992154	+	5175	1	Abhd13
NM_026869	NM_026869	chr3	89430837	89435130	+	2908	1	Pygo2
NM_197988	NM_197988	chr8	120608602	120634382	-	728	1	1190005I06Rik
NM_001254762	NM_001254762	chr5	137596647	137600708	-	1309	1	Mospd3
NM_026877	NM_026877	chr11	120672973	120709446	+	1820	1	Aspscr1
NM_026879	NM_026879	chr16	65539133	65562697	-	1830	1	Chmp2b
NM_026891	NM_026891	chr2	120716154	120731517	-	6354	1	Cdan1
NM_026897	NM_026897	chr17	25782787	25785338	-	1295	1	Haghl
NM_026898	NM_026898	chr16	32247253	32257083	+	1389	1	Wdr53
NM_021336	NM_021336	chr7	66060336	66074587	+	1239	1	Snrpa1
NM_026899	NM_026899	chr4	155704815	155733873	+	1444	1	Ssu72
NM_026900	NM_026900	chr7	5051532	5053723	+	1098	1	Zfp580
NM_026911	NM_026911	chr14	30999826	31001666	-	1000	1	Spcs1
NM_026913	NM_026913	chr1	37878890	37890411	-	1220	1	Mitd1
NM_026914	NM_026914	chr15	82346046	82349062	+	580	1	Smdt1
NM_026916	NM_026916	chr5	129908540	129911281	+	623	1	Nupr1l
NR_045427	NR_045427	chr17	28271708	28273163	+	414	1	1810013A23Rik
NM_026929	NM_026929	chr2	119351242	119354327	+	1565	1	Chac1
NM_001099674	NM_001099674	chr3	14606289	14611256	-	395	1	1810022K09Rik
NM_026963	NM_026963	chr4	149485333	149496667	+	1768	1	Lzic
NM_026987	NM_026987	chr17	35879778	35892668	+	3368	1	Dhx16
NM_148927	NM_148927	chr7	45526330	45554229	+	2638	1	Plekha4
NM_145692	NM_145692	chr1	9968622	10009136	-	1416	1	Ppp1r42
NM_001166494	NM_001166494	chr11	98551097	98558665	+	1630	1	Zpbp2
NM_027064	NM_027064	chr13	98984090	98984565	-	473	1	1700024P04Rik
NM_139139	NM_139139	chr2	119172500	119208795	-	995	1	Dnajc17
NM_027091	NM_027091	chr2	80638812	80660071	+	2721	1	Nup35
NR_028122	NR_028122	chr2	163472545	163473003	+	458	1	2310001K24Rik
NM_027113	NM_027113	chr16	36041190	36042974	+	1782	1	Wdr5b
NM_027121	NM_027121	chr5	129942109	129986692	+	4914	1	Vkorc1l1
NM_001291031	NM_001291031	chr2	131210360	131213514	+	1596	1	Ap5s1
NM_027159	NM_027159	chr1	34436670	34439672	-	1698	1	Ccdc115
NM_027162	NM_027162	chr11	115607919	115612503	-	1648	1	Mif4gd
NM_001290381	NM_001290381	chr7	3620324	3629929	-	1158	1	Tfpt
NM_027182	NM_027182	chr13	73912462	73937767	-	2252	1	Trip13
NM_027196	NM_027196	chr19	4231893	4233634	+	913	1	Pold4
NM_197992	NM_197992	chr6	83078390	83080855	+	863	1	Pcgf1
NM_027236	NM_027236	chr19	5366813	5371511	+	2461	1	Eif1ad
NM_027241	NM_027241	chr3	96577872	96594181	-	1417	1	Polr3gl
NM_027270	NM_027270	chr5	76529311	76570298	+	3374	1	Exoc1
NR_038009	NR_038009	chr1	64679869	64690659	-	711	1	2810408I11Rik
NM_133718	NM_133718	chr9	79768941	79793430	-	3651	1	Tmem30a
NR_040523	NR_040523	chr6	39063879	39067586	-	898	1	1700025N23Rik
NM_144527	NM_144527	chr4	134129858	134187085	-	3850	1	Cep85
NM_133786	NM_133786	chr3	69004972	69034623	+	4056	1	Smc4
NM_198246	NM_198246	chr16	16302965	16309640	+	1580	1	Yars2
NM_144801	NM_144801	chr7	45897069	45917413	+	2159	1	Tmem143
NM_001285826	NM_001285826	chr1	58430993	58445486	-	1412	1	Ppil3
NM_027355	NM_027355	chr16	32277461	32301439	+	4457	1	Rnf168
NM_027356	NM_027356	chr5	137294669	137295664	+	993	1	Ufsp1
NM_172404	NM_172404	chr2	30185131	30205699	-	1908	1	Ccbl1
NM_027332	NM_027332	chr3	146510795	146521423	-	1983	1	Rpf1
NM_144528	NM_144528	chr10	79758515	79766952	-	1628	1	Rnf126
NR_033133	NR_033133	chr11	69846644	69852058	+	2967	1	Plscr3
NM_027381	NM_027381	chr10	81321103	81326251	+	2713	1	Cactin
NM_028177	NM_028177	chr7	122088044	122101848	-	793	1	Ndufab1
NM_197995	NM_197995	chr11	120464326	120467600	-	2016	1	Arl16
NM_027394	NM_027394	chr9	86307234	86464916	-	1816	1	Ube2cbp
NM_133726	NM_133726	chr15	81365044	81399694	-	1608	1	St13
NM_027427	NM_027427	chr11	83473108	83506740	+	2031	1	Taf15
NM_027430	NM_027430	chr1	165461208	165481214	+	847	1	Mpc2
NM_183287	NM_183287	chr16	17113398	17125106	-	1256	1	2610318N02Rik
NM_001291135	NM_001291135	chr2	158028497	158078207	+	4593	1	Rprd1b
NM_027435	NM_027435	chr15	58094047	58135082	-	5653	1	Atad2
NM_027482	NM_027482	chr3	127869688	127896323	-	1599	1	5730508B09Rik
NM_027485	NM_027485	chr8	72494559	72548310	-	3034	1	Med26
NM_027518	NM_027518	chr14	45219717	45280976	+	2435	1	Gpr137c
NM_145154	NM_145154	chr9	20873809	20879710	-	1556	1	Angptl6
NM_001039353	NM_001039353	chr19	46075847	46085543	+	3647	1	Nolc1
NM_080510	NM_080510	chr2	122160700	122179027	+	1749	1	Trim69
NM_027661	NM_027661	chr1	56636051	56637451	-	1398	1	Hsfy2
NR_038025	NR_038025	chr10	116950562	116963279	+	1720	1	4933412E12Rik
NM_153196	NM_153196	chr5	31624439	31697610	-	1015	1	Rbks
NM_178381	NM_178381	chr7	141101219	141117806	-	2986	1	Ano9
NM_207301	NM_207301	chr16	96145419	96157852	+	2476	1	Wrb
NM_001168373	NM_001168373	chr9	108490676	108502337	+	4677	1	Usp19
NM_001033161	NM_001033161	chr8	105258575	105264594	-	1378	1	Tradd
NM_027854	NM_027854	chr5	130222335	130243765	+	3660	1	Tmem248
NM_027860	NM_027860	chr11	23573776	23633631	-	4116	1	0610010F05Rik
NM_001163661	NM_001163661	chr17	25099569	25115967	-	3508	1	Telo2
NM_027901	NM_027901	chr5	31156006	31180144	-	4530	1	Gtf3c2
NM_027908	NM_027908	chr10	93523338	93540033	-	2410	1	Amdhd1
NM_027909	NM_027909	chr9	44309237	44320282	-	4318	1	C2cd2l
NM_027911	NM_027911	chr9	21074164	21091988	-	3429	1	Raver1
NM_001253814	NM_001253814	chr5	110231004	110256651	+	5244	1	Ankle2
NM_027925	NM_027925	chr4	132311763	132329538	-	1119	1	Trnau1ap
NM_027927	NM_027927	chr3	133091953	133110985	+	2976	1	Ints12
NM_027930	NM_027930	chr10	20347819	20361669	+	2298	1	Mtfr2
NM_027931	NM_027931	chr3	95739974	95754977	-	2488	1	Tars2
NM_027947	NM_027947	chr2	33450288	33468532	-	5083	1	Zbtb43
NM_133737	NM_133737	chr6	57702455	57739449	+	3646	1	Lancl2
NM_027968	NM_027968	chr10	11281330	11297969	+	4972	1	Fbxo30
NM_001293703	NM_001293703	chr8	25720048	25724887	+	1545	1	Plpp5
NM_028007	NM_028007	chr8	85717557	85840949	-	3335	1	Itfg1
NM_023633	NM_023633	chr12	83950608	83952953	+	2343	1	2410016O06Rik
NM_028018	NM_028018	chr8	109671321	109693294	-	2330	1	Ist1
NM_028036	NM_028036	chr18	36735070	36742391	+	1801	1	Tmco6
NM_028041	NM_028041	chr5	120613130	120628592	+	3909	1	Ddx54
NM_028047	NM_028047	chr7	24399628	24422777	+	2216	1	Smg9
NM_028048	NM_028048	chr11	68968131	68972515	+	1820	1	Slc25a35
NM_028056	NM_028056	chr17	24215056	24220769	-	2131	1	1600002H07Rik
NM_028057	NM_028057	chr1	134405990	134411738	+	1615	1	Cyb5r1
NM_028087	NM_028087	chr9	70031496	70038088	-	4296	1	Gcnt3
NM_001285839	NM_001285839	chr1	53313624	53326342	+	1857	1	Osgepl1
NM_001141977	NM_001141977	chr2	152847964	152895321	+	4345	1	Tpx2
NM_001039088	NM_001039088	chr18	67774876	67795487	+	3531	1	Seh1l
NM_028142	NM_028142	chr4	116031770	116053876	-	3503	1	Nsun4
NM_028152	NM_028152	chr19	41943707	41981136	-	3932	1	Mms19
NM_152812	NM_152812	chr4	14809505	14826587	-	3250	1	Otud6b
NM_028170	NM_028170	chr8	72443880	72460541	+	2417	1	1700030K09Rik
NR_040689	NR_040689	chr5	73268580	73284184	-	572	1	1700025M24Rik
NM_001286545	NM_001286545	chr9	72985504	73016341	+	2931	1	Ccpg1
NM_028184	NM_028184	chr7	144915194	144921137	+	1952	1	Oraov1
NR_045345	NR_045345	chr10	116723067	116729177	-	591	1	1700030O20Rik
NM_028198	NM_028198	chr17	46202855	46242299	+	3675	1	Xpo5
NM_028203	NM_028203	chr12	75630594	75669537	-	2977	1	Wdr89
NM_001164625	NM_001164625	chr15	85806972	85811697	-	1051	1	Cdpf1
NM_028227	NM_028227	chr5	121660563	121687249	+	3723	1	Brap
NR_027360	NR_027360	chr6	128357000	128362822	-	1895	1	Rhno1
NM_028242	NM_028242	chrX	57053570	57067182	+	2842	1	Htatsf1
NM_001002004	NM_001002004	chr11	78261754	78290625	+	7402	1	2610507B11Rik
NM_175185	NM_175185	chr8	119561978	119575200	-	3162	1	Hsdl1
NM_133746	NM_133746	chr19	47132232	47138294	-	2044	1	Calhm2
NM_024256	NM_024256	chr19	8920393	8927236	+	1577	1	B3gat3
NM_183091	NM_183091	chr15	76626237	76639929	-	4179	1	Tonsl
NM_177323	NM_177323	chr5	23787711	23820369	+	3281	1	Rint1
NM_028347	NM_028347	chr9	57143256	57147034	-	1160	1	Neil1
NR_029441	NR_029441	chr6	134897961	134900785	+	2824	1	2810454H06Rik
NM_028372	NM_028372	chr13	81711417	81753275	+	3877	1	Mblac2
NM_028381	NM_028381	chr17	55959187	55967951	+	1303	1	Ccdc94
NM_134059	NM_134059	chr13	55530410	55536658	-	2186	1	Ddx41
NM_201226	NM_201226	chr4	154011803	154021512	+	3386	1	Lrrc47
NM_182993	NM_182993	chr7	45163921	45176139	+	2926	1	Slc17a7
NM_028427	NM_028427	chr8	64947185	64969037	+	1118	1	Tmem192
NM_028431	NM_028431	chr5	21737160	21757152	+	1581	1	Pmpcb
NM_001007570	NM_001007570	chr8	70184340	70212281	-	3162	1	Slc25a42
NM_028453	NM_028453	chr4	138895379	138913947	-	1660	1	Otud3
NR_027892	NR_027892	chr6	50566643	50594865	+	937	1	5430402O13Rik
NR_040462	NR_040462	chr1	9747648	9771256	+	1490	1	1700034P13Rik
NM_028542	NM_028542	chrX	8123301	8132858	-	4474	1	Wdr13
NM_173441	NM_173441	chr18	32067734	32104331	+	9607	1	Iws1
NR_027900	NR_027900	chr17	24719531	24719965	-	181	1	Snhg9
NR_015475	NR_015475	chr18	38238405	38250198	-	1560	1	1700086O06Rik
NR_027388	NR_027388	chr5	25530018	25531466	+	1448	1	1700096K18Rik
NM_001162906	NM_001162906	chr15	8169106	8271158	+	10414	1	2410089E03Rik
NM_001243908	NM_001243908	chr7	29908517	29916813	+	2613	1	Zfp383
NM_028657	NM_028657	chr10	81357570	81364035	+	1690	1	Mfsd12
NM_178628	NM_178628	chr12	69893105	69964085	+	2801	1	Atl1
NM_028710	NM_028710	chr11	109473374	109573329	+	3261	1	Arsg
NR_046036	NR_046036	chr3	122882592	122924116	-	762	1	4933405D12Rik
NM_028754	NM_028754	chr4	107889899	107897802	+	1542	1	0610037L13Rik
NM_023732	NM_023732	chr1	75171641	75180392	-	3021	1	Abcb6
NM_028758	NM_028758	chr7	121986722	122021198	-	4872	1	Gga2
NM_028766	NM_028766	chr6	91473751	91488458	+	2836	1	Tmem43
NM_028769	NM_028769	chr19	6046576	6053718	+	3452	1	Syvn1
NM_028780	NM_028780	chr14	55635966	55643806	-	2508	1	Tm9sf1
NM_175206	NM_175206	chr9	66508459	66514593	-	3931	1	Fbxl22
NM_028794	NM_028794	chr5	104046864	104065378	+	1482	1	Nudt9
NR_015551	NR_015551	chr12	3235791	3250374	+	1066	1	Rab10os
NM_028808	NM_028808	chr3	59207894	59210882	-	2522	1	P2ry13
NM_028817	NM_028817	chr1	78657825	78707743	+	3932	1	Acsl3
NM_133755	NM_133755	chr7	139995955	140036350	-	3065	1	Tubgcp2
NM_001001566	NM_001001566	chr1	75474569	75479471	-	3086	1	Chpf
NM_178389	NM_178389	chr4	135965165	135968178	+	1525	1	Gale
NM_028841	NM_028841	chr13	54789405	54796775	+	1546	1	Tspan17
NM_028870	NM_028870	chr13	54592939	54611272	-	1569	1	Cltb
NM_028881	NM_028881	chr3	90254281	90264125	+	2613	1	Crtc2
NM_028888	NM_028888	chr8	105280409	105289528	-	3543	1	4931428F04Rik
NM_028906	NM_028906	chr9	65032458	65082651	+	4741	1	Dpp8
NM_028925	NM_028925	chr3	96711895	96727439	-	1779	1	Polr3c
NM_028959	NM_028959	chr13	74036495	74062285	-	3618	1	Cep72
NM_001159288	NM_001159288	chr11	3649494	3690370	+	5056	1	Morc2a
NM_029022	NM_029022	chr2	73312652	73337807	+	3237	1	Scrn3
NM_029023	NM_029023	chr11	88924020	88955442	-	2059	1	Scpep1
NM_029037	NM_029037	chr8	25980604	25994121	-	3594	1	Pomk
NM_029098	NM_029098	chr15	98903921	98918098	-	2148	1	Lmbr1l
NM_001162863	NM_001162863	chr14	51007751	51010758	+	1517	1	Rnase10
NM_029173	NM_029173	chr13	51171025	51175187	+	1159	1	Nxnl2
NM_181815	NM_181815	chr12	90998492	91384409	-	4779	1	Cep128
NM_023773	NM_023773	chr14	56668248	56697429	+	2922	1	Mphosph8
NM_029272	NM_029272	chr10	80249452	80256792	+	748	1	Ndufs7
NM_029279	NM_029279	chr13	51651708	51684044	+	3298	1	Secisbp2
NM_029291	NM_029291	chr11	4637793	4683386	+	2583	1	Ascc2
NR_040418	NR_040418	chr19	46348201	46348988	-	787	1	2310034G01Rik
NR_033571	NR_033571	chr14	20546293	20570680	+	745	1	1810062O18Rik
NM_178392	NM_178392	chr12	73964530	73984820	+	2113	1	Snapc1
NM_001025586	NM_001025586	chr8	70131327	70133751	+	1186	1	Nr2c2ap
NM_001165980	NM_001165980	chr2	71055744	71095858	+	7723	1	Dcaf17
NM_029420	NM_029420	chr7	126688927	126695783	-	3684	1	Slx1b
NM_001080813	NM_001080813	chr8	27138773	27174646	-	7957	1	Rab11fip1
NM_029458	NM_029458	chr11	4346383	4441082	-	1330	1	Hormad2
NM_029466	NM_029466	chr2	15055362	15079191	+	3586	1	Arl5b
NM_029468	NM_029468	chr8	109706019	109724932	+	2140	1	Zfp821
NM_029478	NM_029478	chr11	86583865	86683822	-	2759	1	Vmp1
NM_029482	NM_029482	chr3	79629079	79632819	+	1965	1	4930579G24Rik
NM_175229	NM_175229	chr17	23803187	23824743	+	8584	1	Srrm2
NM_001029993	NM_001029993	chr8	122376616	122417360	+	3783	1	Zc3h18
NM_023799	NM_023799	chr19	45750259	45783291	-	4779	1	Mgea5
NM_001033173	NM_001033173	chr7	121642021	121707253	-	10181	1	Usp31
NM_133763	NM_133763	chr2	164746015	164768219	+	1229	1	Dnttip1
NM_029557	NM_029557	chr11	115814739	115823102	+	1959	1	Tsen54
NM_029576	NM_029576	chr19	5099207	5106996	-	1827	1	Rab1b
NM_172601	NM_172601	chr14	52261759	52279395	-	2746	1	Rab2b
NM_001199843	NM_001199843	chr12	86082561	86162459	+	798	1	Ift43
NM_175241	NM_175241	chr5	107534711	107551542	+	3087	1	1700028K03Rik
NM_175242	NM_175242	chr17	35866615	35875596	+	3180	1	Ppp1r18
NM_172428	NM_172428	chr15	82127922	82142202	+	2036	1	Ccdc134
NR_015577	NR_015577	chr11	5762150	5784710	+	1833	1	Ube2d-ps
NM_133939	NM_133939	chr6	18848635	18854052	+	744	1	Lsm8
NM_178397	NM_178397	chr13	54621784	54664063	+	4309	1	Faf2
NM_027164	NM_027164	chr7	139212988	139242973	+	2094	1	Lrrc27
NM_029673	NM_029673	chr6	71831320	71875266	+	2744	1	Immt
NM_029698	NM_029698	chr14	20394190	20452225	-	3590	1	Cfap70
NM_001165991	NM_001165991	chr2	181357690	181365404	-	2586	1	Arfrp1
NM_029749	NM_029749	chr5	143710326	143732280	-	5130	1	Usp42
NM_133972	NM_133972	chr8	70220193	70234422	-	2188	1	Armc6
NM_029762	NM_029762	chr9	35560821	35570069	-	1637	1	Hyls1
NM_153177	NM_153177	chr4	126489543	126533458	-	6501	1	Ago4
NM_029793	NM_029793	chr2	39016156	39065541	-	4843	1	Golga1
NM_029801	NM_029801	chr3	88282760	88296838	-	475	1	Tsacc
NM_029832	NM_029832	chr2	130654083	130664645	-	1090	1	Ddrgk1
NM_029847	NM_029847	chr13	76060422	76098660	-	3647	1	Arsk
NM_029865	NM_029865	chr8	71371298	71373689	+	1646	1	Ocel1
NM_001110201	NM_001110201	chr7	29238323	29247532	+	1125	1	Yif1b
NM_029888	NM_029888	chr1	74566426	74588028	-	6163	1	Zfp142
NM_175255	NM_175255	chr11	51692263	51756834	-	6773	1	Sec24a
NM_029929	NM_029929	chr5	123528760	123573015	-	4096	1	Vps33a
NM_001012518	NM_001012518	chr2	24790769	24919609	-	5078	1	Ehmt1
NM_029956	NM_029956	chr5	114431034	114444027	-	2976	1	Mmab
NM_029965	NM_029965	chr8	26119380	26143869	+	3905	1	Rnf170
NM_175266	NM_175266	chr9	111271845	111279091	+	7244	1	Epm2aip1
NM_029998	NM_029998	chr15	12808177	12824657	-	3963	1	6030458C11Rik
NM_030014	NM_030014	chr4	95967379	96024274	+	4215	1	Hook1
NM_001166218	NM_001166218	chr13	67038594	67061170	-	3964	1	Zfp712
NM_030081	NM_030081	chr6	92186712	92214811	-	5206	1	Rbsn
NM_030083	NM_030083	chr11	69395791	69396671	+	513	1	Naa38
NM_030113	NM_030113	chr8	77250366	77517907	-	3013	1	Arhgap10
NR_033567	NR_033567	chr7	35802592	35838074	+	693	1	E130304I02Rik
NM_001162506	NM_001162506	chr15	99074973	99083409	+	2225	1	Troap
NM_183137	NM_183137	chr11	120090522	120098731	-	2764	1	Enthd2
NM_028421	NM_028421	chr6	38310497	38354603	-	3770	1	Zc3hav1
NM_030198	NM_030198	chr8	95633559	95645059	+	2407	1	Gins3
NM_030199	NM_030199	chr15	75940952	75949400	+	2482	1	Zfp623
NM_030233	NM_030233	chr7	46686108	46710651	-	4685	1	Saal1
NM_030235	NM_030235	chr6	56714905	56761911	+	6673	1	Avl9
NM_030254	NM_030254	chr8	39005867	39130817	+	1124	1	Tusc3
NM_001038703	NM_001038703	chr5	139389904	139396414	+	4141	1	Gpr146
NM_173002	NM_173002	chr6	90369494	90403486	+	4110	1	Zxdc
NM_020000	NM_020000	chr4	118409337	118415824	+	1878	1	Med8
NM_001141921	NM_001141921	chr7	28452238	28467548	+	2577	1	Lrfn1
NM_001004140	NM_001004140	chr8	22168152	22185819	-	2590	1	Ckap2
NM_031184	NM_031184	chr16	4594713	4615957	+	3610	1	Glis2
NM_001272078	NM_001272078	chr17	48346401	48352276	+	1139	1	Trem2
NM_031380	NM_031380	chr10	79777274	79782630	+	1946	1	Fstl3
NM_031392	NM_031392	chr9	108572313	108578670	-	4084	1	Wdr6
NM_031403	NM_031403	chr9	99575799	99584343	+	2093	1	Dbr1
NM_031843	NM_031843	chr2	25352290	25356332	-	1640	1	Dpp7
NM_023646	NM_023646	chr16	4684070	4707693	+	2632	1	Dnaja3
NM_019729	NM_019729	chr2	126707328	126759314	+	4156	1	Usp8
NM_146087	NM_146087	chr18	61555582	61588299	+	2001	1	Csnk1a1
NM_080560	NM_080560	chr10	95515162	95545658	+	3845	1	Ube2n
NM_023647	NM_023647	chr7	55931266	55962493	-	3980	1	Nipa2
NM_053177	NM_053177	chr8	3500519	3515231	+	1986	1	Mcoln1
NM_053179	NM_053179	chr4	46489329	46503438	+	1896	1	Nans
NM_033570	NM_033570	chr1	36471597	36508776	+	4573	1	Cnnm4
NM_033324	NM_033324	chr16	18253965	18289168	-	4209	1	Dgcr8
NM_053193	NM_053193	chr15	76595808	76607591	-	4477	1	Cpsf1
NM_053196	NM_053196	chr19	46573365	46596900	+	3198	1	Sfxn2
NM_033573	NM_033573	chr3	87858903	87885562	-	2044	1	Prcc
NM_033596	NM_033596	chr3	96262934	96263317	-	381	1	Hist2h4
NM_175287	NM_175287	chr4	153957237	153961924	+	1091	1	A430005L14Rik
NM_001271915	NM_001271915	chr8	105252638	105255153	-	2513	1	B3gnt9
NR_027958	NR_027958	chr11	51650954	51657681	+	3425	1	D930048N14Rik
NM_026876	NM_026876	chr1	151428648	151458183	+	2648	1	Trmt1l
NM_133837	NM_133837	chr2	5794294	5844960	-	1608	1	Cdc123
NM_172118	NM_172118	chr2	156775464	156781657	+	1077	1	Myl9
NM_133840	NM_133840	chr2	84723122	84727268	-	1825	1	Clp1
NM_207207	NM_207207	chr2	130563757	130565394	+	956	1	Mrps26
NM_001081091	NM_001081091	chr2	125563088	125625113	-	5738	1	Cep152
NM_139308	NM_139308	chr2	127270229	127298934	+	3108	1	Stard7
NM_133857	NM_133857	chr3	122933601	122984447	-	3996	1	Usp53
NM_025444	NM_025444	chr3	108571699	108582068	+	1283	1	Taf13
NM_001081093	NM_001081093	chr3	84496093	84582625	-	2975	1	Arfip1
NM_001081392	NM_001081392	chr4	32657119	32775217	+	17855	1	Mdn1
NM_029571	NM_029571	chr4	108847857	108849412	+	1553	1	Kti12
NM_133880	NM_133880	chr4	134396320	134427412	+	3155	1	Pafah2
NM_175306	NM_175306	chr4	132355925	132422446	-	4553	1	Phactr4
NM_001285885	NM_001285885	chr4	127077383	127124374	+	5005	1	Zmym6
NM_133884	NM_133884	chr4	133584373	133591735	+	1349	1	Gpn2
NM_133349	NM_133349	chr5	139471216	139484491	-	3097	1	Zfand2a
NM_001081362	NM_001081362	chr5	144768792	144859773	+	12403	1	Trrap
NM_133904	NM_133904	chr5	114165518	114250758	+	8431	1	Acacb
NM_153571	NM_153571	chr5	110829070	110839777	-	796	1	Hscb
NM_027295	NM_027295	chr5	41624973	41708179	-	1654	1	Rab28
NM_001177901	NM_001177901	chr5	31198981	31202042	-	2210	1	Zfp513
NM_146175	NM_146175	chr6	47877555	47908484	+	5211	1	Zfp282
NM_001081118	NM_001081118	chr7	141228788	141262751	+	5354	1	Phrf1
NM_133945	NM_133945	chr7	44748629	44777514	+	1735	1	Vrk3
NM_027256	NM_027256	chr7	97480956	97541398	+	3219	1	Ints4
NM_133951	NM_133951	chr7	105731730	105737385	-	2881	1	Rrp8
NM_181854	NM_181854	chr8	13869641	13881639	+	4009	1	Champ1
NM_133964	NM_133964	chr10	81384428	81388352	+	1437	1	Dohh
NM_133968	NM_133968	chr8	4253102	4256220	+	1507	1	Snapc2
NM_133976	NM_133976	chr9	56937500	56938398	+	896	1	Imp3
NM_153537	NM_153537	chr9	44686308	44735198	-	5437	1	Phldb1
NM_133994	NM_133994	chr10	75774122	75781414	-	1866	1	Gstt3
NM_133995	NM_133995	chr10	75406911	75441679	+	3030	1	Upb1
NM_134020	NM_134020	chr11	6270714	6274837	-	1618	1	Tmed4
NM_025559	NM_025559	chr11	98437708	98438988	-	738	1	Mien1
NM_134029	NM_134029	chr11	59848073	59876533	+	1299	1	Nt5m
NM_027874	NM_027874	chr11	120961741	120991333	-	3737	1	Csnk1d
NM_181266	NM_181266	chr2	150114407	150136678	-	4090	1	Zfp120
NM_001177601	NM_001177601	chr11	70235204	70237914	-	878	1	0610010K14Rik
NM_024205	NM_024205	chr12	72085839	72101527	+	1967	1	Jkamp
NM_001081057	NM_001081057	chr12	110889264	110972394	+	7807	1	Tecpr2
NM_134063	NM_134063	chr13	3566035	3611108	-	8316	1	Fam208b
NM_145367	NM_145367	chr13	38500271	38528484	-	2633	1	Txndc5
NM_134065	NM_134065	chr13	19591708	19619830	-	2382	1	Epdr1
NM_134067	NM_134067	chr13	14630258	14638202	+	2006	1	AW209491
NM_177992	NM_177992	chr14	55672235	55678751	+	1532	1	Gmpr2
NM_153083	NM_153083	chr14	55094784	55098995	+	2835	1	Thtpa
NR_045309	NR_045309	chr15	80691025	80697610	-	4438	1	A430088P11Rik
NM_145930	NM_145930	chr15	3982035	3995752	-	5076	1	AW549877
NM_134100	NM_134100	chr15	102279456	102281744	+	1738	1	Mfsd5
NM_145931	NM_145931	chr16	11136594	11176393	-	3798	1	Zc3h7a
NM_001039521	NM_001039521	chr16	13780699	13814841	+	3578	1	Rrn3
NM_134122	NM_134122	chr17	35861318	35865400	+	1458	1	Nrm
NM_001163766	NM_001163766	chr17	25844734	25861515	-	6025	1	Wdr90
NM_174989	NM_174989	chr17	56269462	56276767	-	2826	1	Ticam1
NM_001289490	NM_001289490	chr17	48410000	48417270	+	1346	1	Oard1
NM_134135	NM_134135	chr10	81028540	81033912	-	3458	1	Slc39a3
NM_134151	NM_134151	chr4	129189795	129219607	+	2859	1	Yars
NM_029735	NM_029735	chr1	185363095	185428355	+	4816	1	Eprs
NM_026943	NM_026943	chr7	19149838	19152726	+	483	1	Snrpd2
NM_023326	NM_023326	chr2	25706879	25707719	+	838	1	Bmyc
NM_144939	NM_144939	chr17	47695207	47704286	+	2126	1	Frs3
NM_145147	NM_145147	chr5	110103977	110108197	-	1603	1	Gtpbp6
NM_133196	NM_133196	chrX	134059176	134086822	+	4510	1	Cstf2
NM_175135	NM_175135	chr4	117019408	117073260	+	3742	1	Eif2b3
NM_054051	NM_054051	chr11	97715157	97744704	-	5041	1	Pip4k2b
NM_182997	NM_182997	chr3	97658212	97673067	+	4251	1	Prkab2
NM_024187	NM_024187	chr17	31647082	31658754	-	897	1	U2af1
NM_025898	NM_025898	chr7	16098643	16117975	+	2319	1	Napa
NM_153794	NM_153794	chr18	68260185	68300333	-	9647	1	Fam210a
NM_022423	NM_022423	chr11	58932288	58938906	-	1933	1	Rnf187
NM_029495	NM_029495	chr14	77904239	78002656	+	1855	1	Epsti1
NM_179203	NM_179203	chr4	155740640	155761098	-	2401	1	Atad3a
NM_175392	NM_175392	chr2	30364335	30385519	+	3529	1	Fam73b
NM_001110152	NM_001110152	chr2	170511230	170519070	+	881	1	Pfdn4
NM_133839	NM_133839	chr2	50279881	50296677	-	1292	1	Mmadhc
NM_133823	NM_133823	chr8	79266424	79294956	-	2834	1	Mmaa
NM_028446	NM_028446	chr12	101837372	101913171	-	6425	1	Trip11
NM_175419	NM_175419	chr2	158624913	158639211	+	2366	1	Actr5
NM_001256521	NM_001256521	chr2	26136808	26140506	-	2470	1	C330006A16Rik
NM_175423	NM_175423	chr5	123015074	123030452	+	1867	1	Orai1
NM_175427	NM_175427	chr2	27110379	27142477	-	2941	1	Fam163b
NM_025371	NM_025371	chr9	106432981	106438236	-	1429	1	Acy1
NM_001290453	NM_001290453	chr7	13042303	13054764	-	3588	1	Mzf1
NM_025900	NM_025900	chr13	47084767	47106221	-	2589	1	Dek
NM_001033668	NM_001033668	chr14	31260375	31323896	-	12792	1	Dnah1
NM_172783	NM_172783	chrX	160502434	160591722	+	4679	1	Phka2
NM_016752	NM_016752	chr11	95384922	95391652	+	1158	1	Slc35b1
NM_024236	NM_024236	chr5	45434032	45450229	-	1385	1	Qdpr
NM_001127338	NM_001127338	chr18	56525736	56572939	-	3083	1	Aldh7a1
NM_183298	NM_183298	chr4	46344194	46345309	+	1114	1	Foxe1
NM_001078167	NM_001078167	chr11	88047373	88053757	+	5555	1	Srsf1
NM_145615	NM_145615	chr9	55454436	55512243	-	1450	1	Etfa
NR_027492	NR_027492	chr16	75755191	75766818	-	4155	1	Hspa13
NM_033072	NM_033072	chr10	127281956	127288771	-	4031	1	Mbd6
NM_033613	NM_033613	chr17	34837019	34839186	+	1463	1	Dxo
NM_053207	NM_053207	chr8	124908587	124949254	-	3517	1	Egln1
NM_053208	NM_053208	chr7	27158658	27166802	-	2099	1	Egln2
NM_053244	NM_053244	chr10	79916971	79922272	+	3155	1	Kiss1r
NM_175428	NM_175428	chr16	97947435	97962621	-	6005	1	Zbtb21
NM_053262	NM_053262	chr5	103989765	104021796	-	1690	1	Hsd17b11
NM_053266	NM_053266	chr5	134184038	134218143	+	3450	1	Gtf2ird2
NM_053267	NM_053267	chr11	3514702	3517351	+	865	1	Selm
NM_054057	NM_054057	chr8	27042555	27056132	+	3593	1	Prosc
NM_054070	NM_054070	chr8	123477862	123503916	+	4249	1	Afg3l1
NM_080463	NM_080463	chr2	153241532	153270249	+	5594	1	Pofut1
NM_001287123	NM_001287123	chr3	59114623	59131328	-	1990	1	P2ry14
NM_001024856	NM_001024856	chr2	120732817	120850418	-	11133	1	Ttbk2
NM_133865	NM_133865	chr3	103800605	103809387	-	4282	1	Dclre1b
NM_080855	NM_080855	chr8	121598703	121651933	-	6461	1	Zcchc14
NM_130879	NM_130879	chr4	137594189	137658537	+	5716	1	Usp48
NM_133216	NM_133216	chr19	52991180	53038654	-	2498	1	Xpnpep1
NM_133229	NM_133229	chr16	94328422	94336935	+	1523	1	Ripply3
NM_133231	NM_133231	chr3	54803115	54807791	-	2157	1	Rfxap
NR_028449	NR_028449	chr15	89123303	89128700	-	2686	1	Hdac10
NM_133358	NM_133358	chr8	71922825	71934630	+	2942	1	Zfp617
NM_134169	NM_134169	chr6	66611651	66612568	-	916	1	Vmn1r33
NM_133643	NM_133643	chr13	12471209	12520450	-	8095	1	Edaradd
NM_133930	NM_133930	chr6	113483569	113493338	+	2022	1	Creld1
NM_138672	NM_138672	chr14	31139017	31168641	-	7924	1	Stab1
NM_138950	NM_138950	chr11	75440943	75454717	-	6897	1	Wdr81
NM_133792	NM_133792	chr8	106150399	106164715	+	2698	1	Pla2g15
NM_177567	NM_177567	chr11	51253651	51262951	-	878	1	BC049762
NM_178592	NM_178592	chr17	35089291	35102987	+	1923	1	Abhd16a
NM_177572	NM_177572	chr4	119465285	119492598	-	4058	1	Rimkla
NM_139296	NM_139296	chr6	40878794	40887494	-	1846	1	Moxd2
NM_178659	NM_178659	chr11	59450045	59458567	+	4437	1	Jmjd4
NM_174847	NM_174847	chr16	97855209	97922633	-	6540	1	C2cd2
NM_001145930	NM_001145930	chr16	20141063	20232573	+	6083	1	Yeats2
NM_177585	NM_177585	chr3	67892220	68056593	+	1573	1	Iqcj
NM_198019	NM_198019	chr19	15955773	15984989	-	2532	1	Cep78
NM_145942	NM_145942	chr13	119690351	119708260	+	3564	1	Hmgcs1
NM_145946	NM_145946	chr7	79392338	79450264	+	4579	1	Fanci
NM_001134767	NM_001134767	chr5	123930689	123969895	+	3905	1	Ccdc62
NM_153532	NM_153532	chrX	48541626	48592133	-	4333	1	Zfp280c
NM_145370	NM_145370	chr11	120784515	120789102	+	1984	1	Gps1
NM_145371	NM_145371	chr5	124570214	124579131	-	2001	1	Eif2b1
NM_173378	NM_173378	chr1	182409167	182462436	+	4350	1	Trp53bp2
NM_173748	NM_173748	chr11	6105692	6200451	-	3954	1	Nudcd3
NM_001081131	NM_001081131	chr2	5898060	5942792	-	3516	1	Dhtkd1
NM_172478	NM_172478	chrX	8154472	8176181	-	2640	1	Tbc1d25
NM_172480	NM_172480	chr13	68560780	68582169	-	3723	1	Mtrr
NM_001081040	NM_001081040	chr10	128363097	128370037	-	2500	1	Coq10a
NM_172490	NM_172490	chr5	52643407	52669701	-	1912	1	Sepsecs
NM_145377	NM_145377	chr11	48806404	48817391	-	3462	1	Trim41
NM_153074	NM_153074	chr8	70616844	70620850	+	1268	1	Lrrc25
NM_153057	NM_153057	chr7	46033696	46084212	+	4226	1	Nomo1
NM_172502	NM_172502	chr8	84097072	84104762	-	2297	1	Dcaf15
NM_172505	NM_172505	chr1	88264828	88277557	-	2210	1	A730008H23Rik
NM_144550	NM_144550	chr16	44347401	44388492	+	4322	1	Spice1
NM_001033248	NM_001033248	chr12	111484609	111485823	-	1212	1	Gm266
NM_153075	NM_153075	chr2	121394355	121413792	-	2232	1	Catsper2
NM_175439	NM_175439	chr1	55237177	55240058	+	2879	1	2019-03-02
NM_145387	NM_145387	chr7	140941581	140947658	+	2959	1	Athl1
NM_172511	NM_172511	chr16	45729725	45742955	-	2841	1	Abhd10
NM_029885	NM_029885	chr3	95181766	95217942	-	8675	1	Gabpb2
NM_001081080	NM_001081080	chr1	30802342	30863256	-	7544	1	Phf3
NM_173383	NM_173383	chr18	36763671	36766214	-	1463	1	Dnd1
NM_175442	NM_175442	chrX	107149615	107173661	+	3004	1	A630033H20Rik
NM_172518	NM_172518	chr4	141147922	141204062	+	5913	1	Fbxo42
NM_145392	NM_145392	chr1	33745484	33757750	-	1810	1	Bag2
NM_001081230	NM_001081230	chr3	82358072	82395268	+	6202	1	Map9
NM_172338	NM_172338	chr4	141761998	141790644	-	3896	1	Dnajc16
NM_153402	NM_153402	chr4	126340678	126429542	-	7614	1	Ago3
NM_145990	NM_145990	chr4	70216855	70410435	-	11801	1	Cdk5rap2
NM_001039534	NM_001039534	chr7	131371146	131387838	+	1121	1	Pstk
NM_001290278	NM_001290278	chr1	192098546	192138040	-	3808	1	Rcor3
NM_001166064	NM_001166064	chr3	145987870	146021720	+	5486	1	Syde2
NM_145997	NM_145997	chr6	120364099	120444574	+	10939	1	Kdm5a
NM_145409	NM_145409	chr17	25719030	25727415	-	3082	1	Chtf18
NM_145410	NM_145410	chr17	25790500	25792394	-	911	1	Fam173a
NM_145412	NM_145412	chr8	106883863	106893593	-	2925	1	Chtf8
NM_145417	NM_145417	chr1	135262699	135284084	-	2288	1	Rnpep
NM_144820	NM_144820	chr10	18213685	18234981	-	1158	1	Ccdc28a
NM_172551	NM_172551	chr10	79736125	79746581	-	3739	1	Polrmt
NM_207522	NM_207522	chr10	105763185	105841380	-	2025	1	Mettl25
NM_175001	NM_175001	chr11	58171654	58179581	+	736	1	Mrpl22
NM_173785	NM_173785	chr11	59155369	59163745	-	4022	1	Iba57
NR_073164	NR_073164	chr11	59791408	59810039	-	3718	1	Flcn
NM_001172112	NM_001172112	chr11	60830631	60858423	+	1573	1	Dhrs7b
NM_001004143	NM_001004143	chr11	61151781	61175059	-	4427	1	Usp22
NM_153143	NM_153143	chr11	69878264	69880985	-	2719	1	Kctd11
NM_001291118	NM_001291118	chr11	69901816	69913824	+	5230	1	Neurl4
NM_178367	NM_178367	chr11	70984091	71004432	-	5165	1	Dhx33
NM_001081220	NM_001081220	chr11	97332109	97352073	-	9263	1	Gpr179
NM_172566	NM_172566	chr11	101425085	101435665	+	3208	1	Rundc1
NM_172571	NM_172571	chr11	116142285	116168178	-	5340	1	Fbf1
NM_001195023	NM_001195023	chr11	120379798	120437700	-	4666	1	Nploc4
NM_172578	NM_172578	chr12	65132735	65172580	-	4000	1	Mis18bp1
NM_183154	NM_183154	chr12	83546941	83597147	-	3855	1	Zfyve1
NM_146047	NM_146047	chr13	73604002	73620639	+	2359	1	Clptm1l
NM_178916	NM_178916	chr13	76001535	76018562	-	2801	1	Rfesd
NM_173392	NM_173392	chr13	92487749	92530810	-	5431	1	Zfyve16
NM_172590	NM_172590	chr13	94976344	95023316	+	3054	1	Wdr41
NM_001166065	NM_001166065	chr13	96924689	96950914	+	5090	1	Gcnt4
NM_172594	NM_172594	chr13	112927793	112969187	+	4070	1	Dhx29
NM_172596	NM_172596	chr14	20674321	20694850	+	4421	1	Sec24c
NM_001004436	NM_001004436	chr14	34673928	34747983	+	6330	1	Wapl
NM_198607	NM_198607	chr15	74721234	74724373	+	1484	1	Them6
NM_175457	NM_175457	chr15	76380513	76453039	+	5223	1	Mroh1
NM_145916	NM_145916	chr15	76879276	76892394	+	2747	1	Zfp7
NM_001142357	NM_001142357	chr15	88805243	88819318	-	2119	1	Alg12
NM_144851	NM_144851	chr15	98038744	98093569	-	6380	1	Senp1
NM_145479	NM_145479	chr16	17759621	17793382	+	2609	1	Klhl22
NM_177326	NM_177326	chr16	32016290	32079342	-	5724	1	Pak2
NM_145482	NM_145482	chr16	93583461	93603815	-	1811	1	Setd4
NM_146074	NM_146074	chr17	3519256	3557713	-	1326	1	Tfb1m
NR_045290	NR_045290	chr17	12318853	12327250	+	3172	1	4732491K20Rik
NM_001163852	NM_001163852	chr17	24175431	24199957	-	7935	1	Tbc1d24
NM_172617	NM_172617	chr17	28177418	28205886	+	2695	1	Zfp523
NM_057171	NM_057171	chr17	35135178	35147322	+	3831	1	Bag6
NM_013854	NM_013854	chr17	35956819	35969750	-	3125	1	Abcf1
NM_198608	NM_198608	chr17	45506841	45520843	+	3325	1	Aars2
NM_145489	NM_145489	chr17	47436639	47470638	+	5025	1	AI661453
NM_001163300	NM_001163300	chr17	56584982	56606294	+	3160	1	Safb
NM_001290345	NM_001290345	chr17	80580513	80728025	-	4120	1	Map4k3
NM_144860	NM_144860	chr18	10725625	10812217	+	3770	1	Mib1
NM_178686	NM_178686	chr18	53681723	53744547	-	4531	1	Cep120
NM_001081073	NM_001081073	chr18	67617397	67641336	-	3965	1	Cep76
NM_153388	NM_153388	chr19	4611784	4615667	-	2914	1	Lrfn4
NM_001271444	NM_001271444	chr19	3908863	3912774	-	1016	1	Ndufs8
NM_146092	NM_146092	chr19	8774354	8786316	-	2189	1	Taf6l
NM_146093	NM_146093	chr19	8871559	8875656	+	1021	1	Ubxn1
NM_144872	NM_144872	chr19	8929694	8941582	+	3156	1	Eml3
NM_146103	NM_146103	chr1	119526154	119528983	+	2827	1	Tmem185b
NM_145511	NM_145511	chr1	150361311	150393055	-	3226	1	BC003331
NM_001039482	NM_001039482	chr1	161088378	161131479	-	4023	1	Klhl20
NM_001005508	NM_001005508	chr1	171388960	171410239	+	4473	1	Arhgap30
NM_001033288	NM_001033288	chr1	15853862	15892722	-	2741	1	Sbspon
NM_172652	NM_172652	chr1	36335730	36369181	-	4640	1	Kansl3
NM_153556	NM_153556	chr1	53189189	53297028	-	3047	1	Pms1
NM_174985	NM_174985	chr1	74278600	74279589	+	988	1	Gpbar1
NM_001190444	NM_001190444	chr1	74279840	74284738	-	1807	1	Aamp
NM_001013376	NM_001013376	chr2	3328949	3332628	-	1023	1	Rpp38
NM_177344	NM_177344	chr2	25255439	25256352	+	911	1	Tmem203
NM_153125	NM_153125	chr2	26409431	26445216	-	8707	1	Sec16a
NM_172660	NM_172660	chr2	30173447	30178459	-	1824	1	D2Wsu81e
NM_172268	NM_172268	chr2	31974450	32053975	+	8157	1	Nup214
NM_001081086	NM_001081086	chr2	69723088	69754059	+	6281	1	Ppig
NM_145526	NM_145526	chr2	84996552	85035834	-	4176	1	P2rx3
NM_145529	NM_145529	chr2	104590484	104665425	+	2829	1	Cstf3
NM_029432	NM_029432	chr2	130706200	130840145	-	6600	1	4930402H24Rik
NM_199304	NM_199304	chr2	154613368	154646817	+	3207	1	Zfp341
NM_001004721	NM_001004721	chr2	155278252	155357424	-	1607	1	Pigu
NM_001291137	NM_001291137	chr2	158409853	158499253	+	8381	1	Ralgapb
NM_173761	NM_173761	chr2	180904377	180920936	-	3164	1	Ythdf1
NM_198169	NM_198169	chr2	181251451	181287966	-	4038	1	Gmeb2
NM_177663	NM_177663	chr3	87930314	87940686	+	2887	1	Isg20l2
NM_145542	NM_145542	chr3	107663120	107696548	-	3832	1	Ahcyl1
NM_001177771	NM_001177771	chr3	108653940	108678840	+	2231	1	Clcc1
NM_172687	NM_172687	chr4	21879675	21912126	+	2604	1	Coq3
NM_001013377	NM_001013377	chr4	43496144	43499660	-	1611	1	Arhgef39
NM_172692	NM_172692	chr4	43566928	43578864	-	3516	1	Gba2
NM_144905	NM_144905	chr4	63560360	63586353	+	3618	1	6330416G13Rik
NM_181040	NM_181040	chr4	115784814	115812314	+	2319	1	Atpaf1
NM_001012400	NM_001012400	chr4	119225138	119232724	-	1860	1	AU022252
NM_153566	NM_153566	chr4	124850759	124855242	+	1547	1	Yrdc
NM_199305	NM_199305	chr4	129676355	129696838	-	1799	1	Tmem39b
NM_145556	NM_145556	chr4	148612382	148626996	-	7446	1	Tardbp
NM_172704	NM_172704	chr4	151933720	151981959	+	2926	1	Dnajc11
NM_172705	NM_172705	chr4	151989631	151996179	-	3122	1	Phf13
NM_198305	NM_198305	chr4	156229044	156234857	-	3000	1	Klhl17
NM_153092	NM_153092	chr5	24164963	24184008	+	2900	1	Nupl2
NM_146159	NM_146159	chr5	34153897	34169424	-	1946	1	Haus3
NM_177680	NM_177680	chr5	86804490	86836657	+	3015	1	Ythdc1
NM_153569	NM_153569	chr5	108569107	108629777	-	4768	1	Gak
NM_001289579	NM_001289579	chr5	110135830	110171973	+	3232	1	Chfr
NM_001010825	NM_001010825	chr5	113735782	113740607	+	3156	1	Ficd
NM_172719	NM_172719	chr5	115565263	115622654	+	8486	1	Gcn1l1
NM_198611	NM_198611	chr5	123510460	123511882	+	1420	1	B3gnt4
NM_153510	NM_153510	chr5	137821952	137836278	-	2579	1	Pilra
NM_001276287	NM_001276287	chr5	140705066	140719378	+	3414	1	Brat1
NM_001289590	NM_001289590	chr5	143235163	143248834	+	5339	1	Zfp12
NM_001081109	NM_001081109	chr5	144100436	144188204	+	8098	1	Lmtk2
NM_001033313	NM_001033313	chr5	145128770	145140089	-	2195	1	Pdap1
NM_183165	NM_183165	chr6	142345697	142362624	+	2141	1	Pyroxd1
NM_172736	NM_172736	chr7	4137056	4148173	+	5077	1	Leng8
NM_146177	NM_146177	chr7	4740127	4747514	+	2224	1	Suv420h2
NM_001290436	NM_001290436	chr7	12897809	12909083	+	3502	1	Zscan22
NM_145579	NM_145579	chr7	18991245	19001766	+	2170	1	Mypop
NM_146182	NM_146182	chr7	19394440	19399921	-	1834	1	Klc3
NM_181593	NM_181593	chr7	27207170	27228597	-	3209	1	Itpkc
NM_001081007	NM_001081007	chr7	30121948	30135032	+	2186	1	Zfp382
NM_178252	NM_178252	chr7	30522226	30535060	-	4423	1	Arhgap33
NM_001033316	NM_001033316	chr7	30854330	30856178	-	1621	1	Ffar3
NM_001042655	NM_001042655	chr7	44840776	44849079	-	2582	1	Tbc1d17
NM_175022	NM_175022	chr7	45027707	45052881	-	6864	1	Prr12
NM_145151	NM_145151	chr7	90442781	90448043	+	5260	1	Crebzf
NM_001162943	NM_001162943	chr7	105752989	105787550	-	10628	1	Dchs1
NM_001081238	NM_001081238	chr7	122107262	122132946	-	3735	1	Palb2
NM_172750	NM_172750	chr8	13235662	13254162	-	1356	1	Adprhl1
NM_172757	NM_172757	chr8	88137885	88171943	+	3120	1	Heatr3
NM_144931	NM_144931	chr8	104511028	104534637	-	1786	1	Nae1
NM_172284	NM_172284	chr8	111003186	111027770	-	6606	1	Ddx19b
NM_177700	NM_177700	chr8	116943393	116960445	+	4871	1	Atmin
NM_144933	NM_144933	chr9	15260351	15279867	-	3886	1	Med17
NM_145610	NM_145610	chr9	20888175	20892179	+	1658	1	Ppan
NM_001115130	NM_001115130	chr9	31030644	31075885	+	8855	1	Zbtb44
NR_104093	NR_104093	chr9	70012548	70022866	+	1028	1	Gtf2a2
NM_176979	NM_176979	chr9	103305327	103350427	+	5081	1	Topbp1
NM_001039586	NM_001039586	chr9	106152860	106158138	-	4083	1	Glyctk
NM_146234	NM_146234	chrX	56585512	56597919	-	4078	1	Mmgt1
NM_178258	NM_178258	chr10	19622028	19634681	+	2461	1	Il22ra2
NM_001013758	NM_001013758	chr10	80832801	80844039	-	3435	1	Lingo3
NM_001037166	NM_001037166	chr10	88729541	88731101	-	1558	1	Gm4925
NM_001110013	NM_001110013	chr10	100443902	100487347	-	5974	1	Tmtc3
NM_183173	NM_183173	chr11	53476578	53480195	-	3615	1	Sowaha
NM_001009927	NM_001009927	chr11	60728398	60732951	+	2516	1	Mief2
NM_001029934	NM_001029934	chr11	84984488	85139955	-	6888	1	Usp32
NM_001013381	NM_001013381	chr11	94539798	94549207	-	4140	1	Rsad1
NM_001159492	NM_001159492	chr11	102475916	102556158	-	6819	1	Gpatch8
NM_001146073	NM_001146073	chr11	121207643	121222656	+	1951	1	Hexdc
NM_199470	NM_199470	chr14	54631992	54641364	-	2714	1	Cdh24
NM_194345	NM_194345	chr14	70583295	70599835	-	4015	1	Fam160b2
NM_001163138	NM_001163138	chr15	5097439	5108533	-	4525	1	Card6
NM_001168276	NM_001168276	chr15	76910370	76925448	-	2290	1	Zfp647
NM_172822	NM_172822	chr16	31933851	31946046	+	2179	1	Pigz
NM_146248	NM_146248	chr17	35517116	35531015	+	2639	1	Cchcr1
NM_001163013	NM_001163013	chr18	44828665	44889720	+	6267	1	Ythdc2
NM_028776	NM_028776	chr1	163929765	163955126	+	4352	1	Scyl3
NM_172859	NM_172859	chr2	144470557	144527398	-	6808	1	Dzank1
NM_177727	NM_177727	chr2	180024987	180035461	+	2523	1	Lsm14b
NM_172868	NM_172868	chr4	57568248	57717128	+	8187	1	Palm2
NM_206870	NM_206870	chr4	88557673	88558245	-	571	1	Ifna15
NM_146255	NM_146255	chr4	107968334	108013532	+	2992	1	Slc1a7
NM_172876	NM_172876	chr4	133574745	133584242	+	1994	1	Gpatch3
NM_001126318	NM_001126318	chr4	137401554	137409791	-	948	1	Cela3a
NM_177736	NM_177736	chr6	48554799	48570722	+	2905	1	Lrrc61
NM_175526	NM_175526	chr6	129426684	129452000	-	3260	1	Clec1a
NM_001167873	NM_001167873	chr7	29983955	30028282	+	7168	1	Zfp568
NM_175534	NM_175534	chr7	143778363	143784500	-	3757	1	Mrgpre
NM_172918	NM_172918	chr9	19622091	19649731	+	4014	1	Zfp317
NM_019864	NM_019864	chr9	95857597	95951644	+	8025	1	Atr
NM_001081499	NM_001081499	chrX	139684996	139754218	+	5884	1	Tbc1d8b
NM_001004154	NM_001004154	chrX	153139958	153171943	+	2268	1	Rragb
NM_001007577	NM_001007577	chrX	166499815	166510478	-	4040	1	Tceanc
NM_172935	NM_172935	chr17	24155833	24163733	-	1450	1	Amdhd2
NM_001288613	NM_001288613	chr1	75180861	75192010	-	4086	1	Atg9a
NM_175542	NM_175542	chr18	88971790	89131014	+	7218	1	Rttn
NM_147776	NM_147776	chr4	155768495	155774561	-	3134	1	Vwa1
NM_027136	NM_027136	chr11	75175943	75178808	-	2638	1	Ovca2
NM_144897	NM_144897	chr3	88056523	88058495	-	897	1	Apoa1bp
NM_145226	NM_145226	chr5	120753098	120777659	-	4700	1	Oas3
NM_146967	NM_146967	chr2	89193100	89194032	-	931	1	Olfr1226
NM_001077707	NM_001077707	chr10	11149430	11215273	+	6917	1	Shprh
NM_172300	NM_172300	chr11	96047431	96065364	-	3965	1	Ube2z
NM_027996	NM_027996	chr14	20707552	20723619	+	6045	1	Zswim8
NM_172960	NM_172960	chr15	76576359	76595811	+	2017	1	Adck5
NM_001033367	NM_001033367	chr17	74426295	74459108	-	3827	1	Nlrc4
NM_173444	NM_173444	chr1	60180599	60334705	+	12051	1	Nbeal1
NM_178750	NM_178750	chr2	180042483	180070201	+	4356	1	Ss18l1
NM_026622	NM_026622	chr3	40894277	40936307	+	2477	1	3110057O12Rik
NM_001109902	NM_001109902	chr5	118190736	118245025	-	4333	1	Rnft2
NM_178752	NM_178752	chr7	80232893	80241420	+	3516	1	Gdpgp1
NM_177765	NM_177765	chr7	80246376	80260821	+	2993	1	Ttll13
NM_173445	NM_173445	chr7	80316616	80324454	-	2329	1	Rccd1
NM_001287164	NM_001287164	chr7	102119400	102210166	-	6647	1	Nup98
NM_177766	NM_177766	chr8	72477995	72492614	-	7021	1	Slc35e1
NM_008097	NM_008097	chr8	84886387	84893921	-	2164	1	Gcdh
NM_001163455	NM_001163455	chr3	132684144	132841688	+	6550	1	Tbck
NM_177778	NM_177778	chr11	115475677	115490466	+	2244	1	Armc7
NM_177367	NM_177367	chr11	76210571	76217572	-	3444	1	Gemin4
NM_001163170	NM_001163170	chr3	96601133	96625352	+	2501	1	Lix1l
NM_175654	NM_175654	chr13	23581602	23581969	+	365	1	Hist1h4d
NM_175656	NM_175656	chr13	22040960	22041362	-	400	1	Hist1h4i
NM_178218	NM_178218	chr11	58954685	58955192	+	505	1	Hist3h2a
NM_175684	NM_175684	chr18	37957434	37969731	-	4205	1	Fchsd1
NM_001160359	NM_001160359	chr1	193173577	193177832	+	3778	1	A130010J15Rik
NM_001256519	NM_001256519	chr11	58315114	58323365	-	3117	1	Zfp672
NM_198308	NM_198308	chr8	111094745	111135144	+	2884	1	Pdpr
NM_178764	NM_178764	chr7	100706702	100841630	+	6572	1	Fam168a
NM_177319	NM_177319	chr19	42170567	42194592	+	5598	1	Zfyve27
NM_001100591	NM_001100591	chr2	37370071	37422903	-	8941	1	Rc3h2
NM_177036	NM_177036	chr7	19875742	19887965	-	3352	1	Ceacam19
NR_102383	NR_102383	chr5	148990056	148995214	-	3983	1	5930430L01Rik
NM_001205369	NM_001205369	chr2	121866970	121936207	+	4190	1	Casc4
NM_001081012	NM_001081012	chr4	83525545	83864670	+	4497	1	Ccdc171
NM_178778	NM_178778	chr2	39066215	39190730	-	10684	1	Scai
NR_033564	NR_033564	chr1	194955759	194976959	-	2486	1	Gm16897
NM_177186	NM_177186	chr4	155601416	155623340	+	6280	1	Slc35e2
NM_001033537	NM_001033537	chr11	98388672	98400490	-	2414	1	Pgap3
NM_177296	NM_177296	chr6	29540827	29609607	-	3946	1	Tnpo3
NM_001015507	NM_001015507	chr9	106821976	106880992	+	5367	1	Vprbp
NM_177806	NM_177806	chr12	65036334	65063386	+	4052	1	Prpf39
NR_045619	NR_045619	chr13	94356749	94358923	-	2174	1	Gm9776
NM_001198571	NM_001198571	chr1	60409619	60481163	+	5862	1	Abi2
NM_183220	NM_183220	chr2	93833467	93849799	-	3990	1	Accs
NM_184088	NM_184088	chr4	86748555	86850602	+	7758	1	Dennd4c
NM_177878	NM_177878	chr5	138194314	138195621	+	1305	1	Mblac1
NM_177882	NM_177882	chr6	47819266	47830505	-	2823	1	Zfp786
NM_177884	NM_177884	chr6	81923669	81959098	+	3356	1	Gcfc2
NM_177889	NM_177889	chr7	30056034	30072823	-	2098	1	Zfp82
NM_001033540	NM_001033540	chr7	30169922	30180209	+	2950	1	Gm5113
NM_177899	NM_177899	chr8	69761324	69774911	-	5758	1	Zfp866
NM_001039514	NM_001039514	chr8	85071757	85075161	+	1321	1	Dhps
NM_183316	NM_183316	chr9	64179297	64182688	+	756	1	Snapc5
NM_198634	NM_198634	chr19	5891138	5894107	-	2111	1	Tigd3
NM_001081021	NM_001081021	chr7	27959800	27979157	-	5503	1	Zfp780b
NM_177396	NM_177396	chr7	28522836	28524322	+	576	1	Ifnl3
NM_181470	NM_181470	chr10	13178638	13193137	-	1755	1	Ltv1
NM_001110508	NM_001110508	chr8	26977336	26981462	+	3300	1	Zfp703
NM_183322	NM_183322	chr1	21349677	21352199	+	1945	1	Khdc1a
NR_038043	NR_038043	chr8	69371025	69395544	-	1767	1	Gm10033
NR_110986	NR_110986	chr2	121449198	121453420	+	3183	1	Serf2
NM_001081193	NM_001081193	chr10	120923411	120979330	-	4728	1	Lemd3
NM_001081194	NM_001081194	chr11	100740378	100759778	-	3765	1	Kcnh4
NM_001013389	NM_001013389	chr13	24992295	25020317	-	2148	1	Mrs2
NM_001033276	NM_001033276	chr15	98831669	98871205	-	19770	1	Kmt2d
NM_207161	NM_207161	chr17	46496789	46499618	+	1100	1	Dnph1
NR_045343	NR_045343	chr19	40868316	40882639	+	875	1	E030044B06Rik
NM_001033449	NM_001033449	chr1	59100593	59120096	-	1853	1	Tmem237
NM_198653	NM_198653	chr1	185286662	185329401	-	3515	1	Iars2
NM_001005424	NM_001005424	chr2	25575416	25580099	-	4681	1	Gm996
NM_001007581	NM_001007581	chr2	165490112	165493314	-	1864	1	Trp53rka
NM_201367	NM_201367	chr2	118277098	118373419	-	3906	1	Gpr176
NM_001101506	NM_001101506	chr4	155734804	155740564	+	1372	1	Tmem240
NM_001163775	NM_001163775	chr7	126869503	126884967	-	5231	1	Taok2
NM_029074	NM_029074	chr8	88118759	88135197	+	1824	1	Cnep1r1
NM_001033469	NM_001033469	chr9	44434234	44440868	-	1659	1	Foxr1
NM_198675	NM_198675	chr9	50768238	50772670	+	1971	1	Fdxacb1
NM_001100460	NM_001100460	chr12	112678840	112682747	+	3474	1	Zbtb42
NM_001001492	NM_001001492	chr16	96158406	96192257	-	3157	1	Lca5l
NM_001008425	NM_001008425	chr17	23668619	23673770	-	1416	1	Thoc6
NM_001291074	NM_001291074	chr2	151494182	151511310	+	1469	1	Nsfl1c
NR_029794	NR_029794	chr11	75173388	75173478	+	90	1	Mir212
NR_029743	NR_029743	chr1	74394310	74394394	+	84	1	Mir26b
NM_207268	NM_207268	chr19	4839366	4842528	+	3160	1	Ccdc87
NR_102396	NR_102396	chr11	103697724	103705669	+	3311	1	C130046K22Rik
NM_001044750	NM_001044750	chr2	144033102	144073979	+	404	1	Banf2
NM_001001181	NM_001001181	chr18	75005900	75009933	+	1042	1	BC031181
NR_033219	NR_033219	chr10	7678971	7681158	-	2187	1	BC020402
NR_046182	NR_046182	chr13	93094833	93098968	+	2986	1	A630019I02Rik
NR_033222	NR_033222	chr12	69197211	69199868	+	2544	1	9330151L19Rik
NM_001013783	NM_001013783	chr11	46404728	46407985	+	2186	1	Fam71b
NM_001034878	NM_001034878	chr11	114727412	114757886	+	2856	1	Dnaic2
NM_001012325	NM_001012325	chr13	67069398	67097976	-	2532	1	Zfp708
NM_001256052	NM_001256052	chr13	67096613	67114028	-	2972	1	Rslcan18
NM_001013799	NM_001013799	chr1	44009408	44020006	-	1079	1	Mettl21c
NM_001033201	NM_001033201	chr4	46138511	46172402	+	3086	1	Ncbp1
NM_001004185	NM_001004185	chr7	81571292	81596836	+	3057	1	Whamm
NM_001013817	NM_001013817	chr1	85600703	85645036	+	2397	1	Sp140
NM_001081402	NM_001081402	chr15	7873055	8099209	-	2131	1	Wdr70
NM_001163270	NM_001163270	chr17	25242659	25256364	-	4609	1	Baiap3
NM_001034900	NM_001034900	chr2	150470991	150485063	-	2700	1	Zfp345
NM_001160265	NM_001160265	chr5	139352617	139357033	+	1502	1	Cyp2w1
NR_073559	NR_073559	chr19	9557606	9559248	-	1005	1	Stxbp3-ps
NM_001195732	NM_001195732	chr1	6359331	6394731	+	851	1	Fam150a
NM_001045540	NM_001045540	chr11	48904656	48927182	-	5282	1	Gm12185
NR_045331	NR_045331	chr2	180385604	180401802	+	2015	1	Gm6307
NM_001039039	NM_001039039	chr7	97332323	97350216	+	2969	1	Kctd21
NR_045699	NR_045699	chr5	151368675	151396164	+	2064	1	1700028E10Rik
NR_040771	NR_040771	chr6	25931426	25977227	+	1556	1	Gm20756
NR_003632	NR_003632	chrX	8097087	8106701	+	1450	1	Gm6787
NM_001164289	NM_001164289	chr14	59380833	59393512	-	1578	1	Phf11c
NM_001037170	NM_001037170	chr1	171217803	171222514	-	2908	1	Tomm40l
NR_029450	NR_029450	chr4	116589733	116597630	-	2433	1	C530005A16Rik
NM_001039532	NM_001039532	chr7	5034446	5038446	-	2142	1	Zfp784
NM_001039560	NM_001039560	chr2	172450313	172458596	-	2214	1	Gcnt7
NR_029458	NR_029458	chr17	32403014	32404808	+	1794	1	A530088E08Rik
NR_029760	NR_029760	chr7	99552269	99552363	+	94	1	Mir326
NR_029751	NR_029751	chr4	150068454	150068555	+	101	1	Mir34a
NR_030455	NR_030455	chr4	11134097	11134182	+	85	1	Mir684-2
NR_030493	NR_030493	chr13	62760739	62760846	+	107	1	Mir713
NM_001115087	NM_001115087	chr7	51860577	51862267	-	1688	1	Fancf
NR_040446	NR_040446	chr3	95871522	95889093	+	1722	1	C920021L13Rik
NR_030670	NR_030670	chr16	20545112	20548556	-	3444	1	Gm15760
NR_030694	NR_030694	chr12	3403883	3426747	-	3297	1	1110002L01Rik
NR_030683	NR_030683	chr2	119321199	119326197	-	975	1	Gm14207
NM_001099918	NM_001099918	chr6	128706508	128723046	-	638	1	Klrb1
NR_027957	NR_027957	chr2	173579320	173659539	-	4451	1	Ppp4r1l-ps
NM_001100110	NM_001100110	chr12	55230478	55263020	+	2498	1	Srp54c
NM_001111288	NM_001111288	chr15	89371637	89373818	-	1140	1	Sco2
NM_001142963	NM_001142963	chr10	81649069	81667361	+	4719	2	Gm10778
NM_172615	NM_172615	chr16	32821702	32868366	-	5277	1	Rubcn
NR_040441	NR_040441	chr4	155608297	155624755	-	2490	1	Gm16023
NR_040442	NR_040442	chr4	116684965	116686022	-	621	1	AV051173
NR_045645	NR_045645	chr19	43675178	43677170	+	1992	1	BC037704
NR_045687	NR_045687	chr19	29067301	29069503	+	662	1	Gm9895
NR_045324	NR_045324	chr1	136683396	136690805	+	411	1	Gm19705
NR_037294	NR_037294	chr8	84208825	84208907	-	82	1	Mir3074-2
NR_037588	NR_037588	chr17	10319919	10321141	+	1222	1	Cahm
NR_038088	NR_038088	chrX	162407200	163352564	-	141	2	Bc1
NR_039595	NR_039595	chr9	62122518	62122594	-	76	1	Mir5133
NR_039549	NR_039549	chr11	115447961	115448060	-	99	1	Mir3968
NR_039553	NR_039553	chr11	75551429	75551511	+	82	1	Mir3971
NM_001142939	NM_001142939	chr12	102739830	102757810	-	3831	1	Gm20604
NM_027592	NM_027592	chr13	100651343	100666415	+	983	1	Ak6
NM_001286689	NM_001286689	chr7	102065491	102083762	+	3233	1	Xndc1
NR_105862	NR_105862	chr1	36144252	36144313	-	61	1	Mir6897
NR_106033	NR_106033	chr8	70102524	70102586	-	62	1	Mir7066
NR_106083	NR_106083	chr2	67675457	67675516	+	59	1	Mir7224
NR_106087	NR_106087	chr5	134572076	134572114	+	38	1	Mir7228
NR_106097	NR_106097	chr8	11635694	11635736	-	42	1	Mir7238
NR_106141	NR_106141	chr10	81416240	81416297	-	57	1	Mir1191b
NR_106173	NR_106173	chr15	36240046	36240164	-	118	1	Mir8097
NR_106179	NR_106179	chr11	102230040	102230150	-	110	1	Mir8101
NR_106192	NR_106192	chr6	71271671	71271801	+	130	1	Mir8112
NR_106200	NR_106200	chr3	65659288	65659426	+	138	1	Mir8120
NR_106180	NR_106180	chr11	97744897	97745035	+	138	1	Mir8102
NR_105922	NR_105922	chr15	80646073	80646136	+	63	1	Mir6957
NR_106111	NR_106111	chr5	34574151	34574213	+	62	1	Mir7036b

## Sheet: IKZF1_unique_genes
Transcript/RepeatID	Gene ID (cmd=analyzeRNA.pl rna mm10 -d Documents/Basespace/Tina-33488506/Tagdirs-Tina/T1-CLP_-_-/)	GeneID	chr	start	end	strand	Length	Copies	Annotation/Divergence
NM_001199136	NM_001199136	11426	chr4	123349633	123684360	-	23395	1	Macf1
NM_023040	NM_023040	11692	chr17	24693191	24696156	-	1770	1	Gfer
NM_007501	NM_007501	11923	chr10	130268152	130280240	-	3341	1	Neurod4
NM_016755	NM_016755	11957	chr16	84827871	84835625	-	802	1	Atp5j
NM_007624	NM_007624	12417	chr6	51470616	51483704	+	1795	1	Cbx3
NM_009888	NM_009888	12628	chr1	140085855	140183411	-	4341	1	Cfh
NM_001301374	NM_001301374	12721	chr7	126699774	126704220	-	1733	1	Coro1a
NM_007725	NM_007725	12798	chr10	79988600	79995400	+	1773	1	Cnn2
NM_007857	NM_007857	13363	chr15	98893027	98898540	-	2362	1	Dhh
NM_007955	NM_007955	13924	chr1	135108498	135132575	-	6040	1	Ptprv
NM_001291894	NM_001291894	14728	chr10	51490898	51496611	+	1489	1	Lilrb4a
NM_010408	NM_010408	15165	chr13	117602320	117981028	+	7901	1	Hcn1
NM_001130444	NM_001130444	15461	chr7	141189934	141194004	-	2264	1	Hras
NM_010630	NM_010630	16581	chr15	76660641	76668196	+	3123	1	Kifc2
NM_010756	NM_010756	17134	chr11	120628351	120633547	-	1631	1	Mafg
NM_008564	NM_008564	17216	chr6	88883474	88898780	-	3353	1	Mcm2
NM_008604	NM_008604	17380	chr3	63295872	63383713	+	5697	1	Mme
NM_001163457	NM_001163457	17777	chr3	138089855	138143388	-	4250	1	Mttp
NM_008688	NM_008688	18029	chr10	81396191	81427173	-	6283	1	Nfic
NM_008737	NM_008737	18186	chr8	128359073	128505475	+	5901	1	Nrp1
NM_013621	NM_013621	18370	chr7	103767277	103771594	-	1352	1	Olfr69
NM_011049	NM_011049	18555	chrX	20688426	20699879	+	3093	1	Cdk16
NM_008811	NM_008811	18598	chr3	141210004	141212355	-	2349	1	Pdha2
NM_001163467	NM_001163467	18685	chr3	103968110	104007491	+	2903	1	Phtf1
NM_008851	NM_008851	18739	chr19	4100622	4113965	+	4487	1	Pitpnm1
NM_011171	NM_011171	19124	chr2	155751217	155755478	+	1498	1	Procr
NM_178855	NM_178855	19146	chr16	78953008	79091097	-	4108	1	Tmprss15
NM_011184	NM_011184	19167	chr12	70974623	70995877	+	2361	1	Psma3
NR_004417	NR_004417	19870	chr3	86138791	86138858	-	67	1	Snord73a
NM_001195662	NM_001195662	19888	chr1	4290846	4409241	-	3041	1	Rp1
NM_013651	NM_013651	20222	chr10	80798735	80804922	+	1663	1	Sf3a2
NM_001136081	NM_001136081	20833	chr2	85037451	85047114	+	2710	1	Ssrp1
NM_009322	NM_009322	21375	chr2	61804453	61814113	+	3968	1	Tbr1
NM_009356	NM_009356	21756	chr1	34552331	34560943	-	1294	1	Prss40
NM_009370	NM_009370	21812	chr4	47353222	47414924	+	5738	1	Tgfbr1
NM_011608	NM_011608	21935	chr16	11313809	11320068	+	807	1	Tnfrsf17
NM_009480	NM_009480	22278	chr1	171411681	171418759	+	1826	1	Usf1
NM_009485	NM_009485	22300	chr4	156331126	156339496	+	3024	1	Vmn2r123
NM_011690	NM_011690	22321	chr17	35000907	35016329	+	4192	1	Vars
NM_172462	NM_172462	22648	chr5	129654595	129670088	-	3911	1	Zfp11
NM_009545	NM_009545	22658	chr11	97688823	97700497	-	2737	1	Pcgf2
NM_011824	NM_011824	23892	chr2	113748675	113758648	-	1635	1	Grem1
NM_011919	NM_011919	26356	chr8	11556457	11563251	+	2419	1	Ing1
NM_001190974	NM_001190974	26362	chr7	25756500	25788733	-	5036	1	Axl
NM_025302	NM_025302	27398	chr17	46646229	46650132	+	1022	1	Mrpl2
NM_015779	NM_015779	50701	chr10	79886312	79888216	+	913	1	Elane
NM_026391	NM_026391	52432	chr7	138846386	138883056	+	2042	1	Ppp2r2d
NM_001276704	NM_001276704	53319	chr19	8757117	8770910	+	4013	1	Nxf1
NM_017383	NM_017383	53870	chr6	104493044	104863405	+	3554	1	Cntn6
NM_019438	NM_019438	54392	chr5	45669925	45700547	+	3675	1	Ncapg
NM_018780	NM_018780	54612	chr19	42197971	42202252	-	1895	1	Sfrp5
NM_019493	NM_019493	56057	chr9	51116001	51119700	+	1304	1	Btg4
NM_019869	NM_019869	56275	chr19	4800566	4811634	-	3163	1	Rbm14
NM_020497	NM_020497	57247	chr8	123254195	123270551	+	4864	1	Zfp276
NM_020595	NM_020595	57329	chr2	143078492	143081699	+	910	1	Otor
NR_033483	NR_033483	57425	chr5	92209895	92215408	-	517	1	U90926
NM_020578	NM_020578	57440	chr17	73804841	73832093	+	3650	1	Ehd3
NM_022654	NM_022654	57913	chr7	141438515	141443355	-	2883	1	Pidd1
NM_021790	NM_021790	60411	chr13	104229388	104249622	+	1210	1	Cenpk
NM_022997	NM_022997	65114	chr8	85260392	85299497	-	3150	1	Vps35
NM_025343	NM_025343	66084	chr10	4403169	4432352	-	1834	1	Rmnd1
NM_025579	NM_025579	66464	chr4	132274375	132293330	+	1343	1	Taf12
NM_025656	NM_025656	66603	chr12	59013391	59028470	+	1578	1	Gemin2
NM_182957	NM_182957	66773	chr5	15028950	15033007	-	1164	1	Gm17019
NM_025791	NM_025791	66836	chr19	8770996	8772475	+	744	1	Tmem223
NM_026075	NM_026075	67288	chr13	104817239	104838659	+	1681	1	Srek1ip1
NM_207677	NM_207677	67379	chr7	25202840	25219859	-	1821	1	Dedd2
NM_026214	NM_026214	67516	chr14	75955003	75965217	+	3011	1	Kctd4
NM_026243	NM_026243	67569	chr10	102374437	102391468	+	3750	1	Mgat4c
NM_026248	NM_026248	67575	chr2	111193254	111229600	-	1820	1	4930430A15Rik
NM_026278	NM_026278	67620	chr8	46010602	46029476	+	3409	1	Lrp2bp
NM_001048057	NM_001048057	67671	chr11	114668543	114672331	+	362	1	Rpl38
NM_026345	NM_026345	67729	chr6	134609207	134632488	-	2370	1	Mansc1
NM_024211	NM_024211	67863	chr11	70644027	70647039	-	1851	1	Slc25a11
NM_026464	NM_026464	67936	chr18	36760239	36763708	+	1489	1	Wdr55
NM_026552	NM_026552	68089	chr6	113378113	113390447	+	2263	1	Arpc4
NM_026684	NM_026684	68342	chr17	24722067	24724388	-	629	1	Ndufb10
NM_026977	NM_026977	69171	chr1	75135215	75142368	-	2727	1	Cnppd1
NM_001199188	NM_001199188	69178	chr2	144250124	144270902	-	2491	1	Snx5
NR_040539	NR_040539	69193	chr3	75647441	75655731	-	1028	1	Platr10
NR_040579	NR_040579	69355	chr10	112726926	112785599	+	880	1	1700010J16Rik
NM_027279	NM_027279	69962	chr1	163994945	163997244	+	1454	1	Mettl18
NM_001085383	NM_001085383	71790	chr3	95296094	95306804	-	1859	1	Anxa9
NM_027934	NM_027934	71816	chr13	105147494	105293014	-	3776	1	Rnf180
NM_028001	NM_028001	71912	chr10	80808496	80813498	-	1107	1	Jsrp1
NM_028074	NM_028074	72047	chr11	106216926	106249140	+	3992	1	Ddx42
NM_028399	NM_028399	72949	chr1	127774164	127804837	+	3503	1	Ccnt2
NM_029021	NM_029021	74614	chr2	165395450	165400394	-	1951	1	Ocstamp
NR_040478	NR_040478	75159	chr1	96612057	96662573	-	580	1	4930533P14Rik
NM_001290573	NM_001290573	75410	chr7	30568855	30588726	-	8445	1	Kmt2b
NM_029361	NM_029361	75607	chr13	49036302	49148328	-	6897	1	Wnk2
NM_029379	NM_029379	75667	chr9	40148122	40150878	+	985	1	Tmem225
NM_029747	NM_029747	76797	chr17	36977701	36981237	-	859	1	2410137M14Rik
NM_030063	NM_030063	78245	chr2	3336168	3340997	+	529	1	Acbd7
NM_031248	NM_031248	83409	chr3	88549819	88552927	-	565	1	Lamtor2
NM_175329	NM_175329	103172	chr10	75935573	75937734	+	942	1	Chchd10
NM_175500	NM_175500	103978	chr14	115092215	116525192	+	2875	1	Gpc5
NM_175402	NM_175402	109095	chr9	106883985	106887000	-	3013	1	Rbm15b
NM_024241	NM_024241	109242	chr4	41390748	41464848	-	5583	1	Kif24
NM_053009	NM_053009	109910	chr19	12766939	12796123	-	5596	1	Zfp91
NM_080438	NM_080438	110304	chr8	55940825	56125352	+	1463	1	Glra3
NM_031867	NM_031867	110326	chr4	152027914	152038490	-	2777	1	Tas1r1
NM_028133	NM_028133	112407	chr12	54178981	54203874	-	2669	1	Egln3
NM_053235	NM_053235	113862	chr6	57209858	57210760	+	901	1	Vmn1r13
NM_033477	NM_033477	114585	chr17	35126402	35128855	+	2121	1	D17H6S53E
NM_080450	NM_080450	118446	chr5	137953809	137962959	-	3510	1	Gjc3
NM_080468	NM_080468	140498	chr5	150018675	150082186	+	3369	1	Rxfp2
NM_133211	NM_133211	170743	chrX	167304926	167330571	-	3789	1	Tlr7
NM_001161738	NM_001161738	170823	chr5	107548967	107597888	-	1980	1	Glmn
NM_198861	NM_198861	192976	chr11	62604884	62648523	-	1978	1	Lrrc75a
NM_001045536	NM_001045536	195018	chr11	72796226	72927120	+	11093	1	Zzef1
NM_172497	NM_172497	211482	chr17	53398889	53463321	-	2646	1	Efhb
NM_001162537	NM_001162537	212448	chr10	29211643	29230779	+	5636	1	9330159F19Rik
NM_001029977	NM_001029977	214403	chr1	139697919	139781239	-	2870	1	Gm4788
NM_145137	NM_145137	216864	chr11	70130357	70137542	+	1538	1	Mgl2
NM_001024920	NM_001024920	216964	chr11	77508099	77513273	-	1357	1	Trp53i13
NM_170758	NM_170758	217303	chr11	114890041	114904651	+	4633	1	Cd300a
NM_001033285	NM_001033285	226751	chr1	179961089	180165602	+	8617	1	Cdc42bpa
NM_198303	NM_198303	226982	chr1	37998010	38055579	+	7771	1	Eif5b
NM_001128103	NM_001128103	228432	chr2	110655201	110950244	-	5997	1	Ano3
NM_145535	NM_145535	228765	chr2	151572623	151590005	+	1387	1	Sdcbp2
NM_144901	NM_144901	229663	chr3	103020546	103058186	+	4176	1	Csde1
NM_153564	NM_153564	229898	chr3	142496934	142522344	+	3008	1	Gbp5
NM_144912	NM_144912	231724	chr5	122325508	122354195	-	1580	1	Rad9b
NM_173408	NM_173408	233805	chr7	119853163	119895458	-	5632	1	Dcun1d3
NM_146205	NM_146205	233912	chr7	128237357	128245100	+	3826	1	Armc5
NM_177705	NM_177705	237029	chrX	126812462	126834004	-	3629	1	4932411N23Rik
NM_001081358	NM_001081358	242274	chr3	158082895	158562221	-	7432	1	Lrrc7
NM_144946	NM_144946	246317	chr18	86394952	86501897	+	3518	1	Neto1
NM_146267	NM_146267	257667	chr10	129111485	129112423	-	937	1	Olfr769
NM_001011761	NM_001011761	257921	chr2	89282196	89283131	-	934	1	Olfr1229
NM_001011849	NM_001011849	258150	chr10	129540539	129541474	+	934	1	Olfr792
NM_001011865	NM_001011865	258189	chr7	103670103	103671029	-	925	1	Olfr624
NM_146426	NM_146426	258418	chr7	107822523	107823467	-	943	1	Olfr469
NM_146673	NM_146673	258668	chr10	130111841	130112788	-	946	1	Olfr823
NM_146680	NM_146680	258675	chr19	12035808	12036740	-	931	1	Olfr1423
NM_146716	NM_146716	258711	chr1	174050375	174051313	+	937	1	Olfr432
NM_146795	NM_146795	258791	chr10	129842108	129843040	-	931	1	Olfr812
NM_207159	NM_207159	259165	chr10	129873823	129874755	-	931	1	Olfr814
NM_013548	NM_013548	260423	chr13	23544052	23544954	+	900	1	Hist1h3f
NM_173439	NM_173439	268882	chr16	32230112	32247025	-	4041	1	Fbxo45
NM_175556	NM_175556	269615	chr4	154983115	155010984	-	5560	1	Plch2
NM_001017985	NM_001017985	277939	chr7	100372233	100470159	+	7777	1	C2cd3
NM_178207	NM_178207	319153	chr13	21782915	21783397	-	480	1	Hist1h3i
NM_178215	NM_178215	319154	chr3	96268654	96269155	+	499	1	Hist2h3b
NM_178183	NM_178183	319169	chr13	21753377	21753912	-	533	1	Hist1h2ak
NM_175660	NM_175660	319172	chr13	23751088	23751592	+	502	1	Hist1h2ab
NM_178182	NM_178182	319191	chr13	21716412	21716859	+	445	1	Hist1h2ai
NM_176965	NM_176965	319634	chr11	77089915	77188968	-	4634	1	Efcab5
NR_045739	NR_045739	319940	chr8	45723325	45819297	-	2468	1	Sorbs2os
NM_177373	NM_177373	327814	chr10	106470310	106933468	+	6400	1	Ppfia2
NR_002862	NR_002862	328451	chr14	89896224	89899447	+	3223	1	Gm5088
NM_001033430	NM_001033430	338523	chr6	39136620	39206773	-	9531	1	Kdm7a
NM_001101519	NM_001101519	403185	chr8	13705889	13743066	+	775	1	4932443I19Rik
NM_207568	NM_207568	404331	chr2	89721165	89722109	-	943	1	Olfr1252
NR_045146	NR_045146	407803	chr17	33908182	33909178	-	838	1	BC051226
NR_110571	NR_110571	433424	chr2	45112260	45114084	+	1217	1	Zeb2os
NM_001207021	NM_001207021	435145	chr15	82206952	82212815	-	1798	1	Shisa8
NM_001011877	NM_001011877	497113	chr14	51049451	51050163	-	710	1	Rnase11
NM_001012520	NM_001012520	503550	chr6	129697218	129717132	-	830	1	Klri1
NM_001099637	NM_001099637	545389	chr1	176733653	176807124	-	6908	1	Cep170
NM_001163271	NM_001163271	623046	chr12	64471333	64474898	-	3563	1	Fscb
NM_001102602	NM_001102602	623734	chr10	130418261	130429612	-	2546	1	Vmn2r85
NM_001081448	NM_001081448	625068	chr10	130385800	130394241	-	2543	1	Vmn2r84
NR_045362	NR_045362	625585	chr3	111881903	112082001	+	1923	1	Gm6602
NR_024331	NR_024331	629159	chr7	127510438	127512869	-	2431	1	1700008J07Rik
NM_001166658	NM_001166658	631990	chrX	61183246	61185558	-	2311	1	Cdr1
NR_003376	NR_003376	664849	chr11	116434213	116439031	+	1296	1	Gm7367
NM_001099309	NM_001099309	666927	chr4	121614004	121622125	-	643	1	Gm12887
NR_045179	NR_045179	667438	chr10	98299927	98351867	-	546	1	Gm8633
NR_029778	NR_029778	724062	chr19	29135279	29135375	+	96	1	Mir101b
NR_030448	NR_030448	751551	chr9	22057713	22379223	-	87	1	Mir680-2
NR_045880	NR_045880	100038356	chr6	88842854	88847274	+	3115	1	Gm15612
NM_015783	NM_015783	100038882	chr4	156199424	156200818	-	752	1	Isg15
NM_001170853	NM_001170853	100040462	chr1	173857220	173880187	-	1896	1	Mndal
NR_027993	NR_027993	100041576	chr5	45719667	45727578	-	7911	1	Gm3414
NM_001256055	NM_001256055	100042807	chr2	122028583	122053631	+	2399	1	Eif3j2
NR_028518	NR_028518	100217414	chr1	159340307	159340424	+	117	1	Scarna3a
NR_028521	NR_028521	100217421	chr1	59704808	59704870	+	62	1	Snord11
NR_034046	NR_034046	100217440	chr4	132310307	132310368	+	61	1	Snora61
NR_028557	NR_028557	100217463	chr10	62765579	62765606	-	27	1	Snord98
NR_027452	NR_027452	100272221	chr17	25274124	25275528	+	1404	1	Gm17801
NR_028129	NR_028129	100302567	chr7	28351540	28351633	+	93	1	AF357399
NR_040297	NR_040297	100503536	chr6	105481266	105492668	-	2943	1	Gm19757
NR_108026	NR_108026	100504029	chr3	95217457	95226658	+	952	1	Gm16740
NM_008220	NM_008220	101488143	chr7	103812524	103813923	-	625	1	Hbb-bt
NR_105760	NR_105760	102465174	chr1	29421488	29421612	+	124	1	Mir6342
NR_105838	NR_105838	102465222	chr10	104287269	104287376	+	107	1	Mir6411
NR_105901	NR_105901	102465565	chr11	120624823	120624876	-	53	1	Mir6936
NR_105911	NR_105911	102465571	chr14	20690635	20690703	+	68	1	Mir6946
NR_105918	NR_105918	102465575	chr15	76248191	76248258	+	67	1	Mir6953
NR_105978	NR_105978	102465611	chr3	88440879	88440951	-	72	1	Mir7011
NR_106139	NR_106139	102465777	chr2	94241378	94241442	+	64	1	Mir129b
NR_106199	NR_106199	102465997	chr4	129557683	129557811	-	128	1	Mir8119
NR_105920	NR_105920	102466210	chr15	78891840	78891913	+	73	1	Mir6955
NR_106021	NR_106021	102466218	chr7	45012426	45012487	-	61	1	Mir7054
NR_105908	NR_105908	102466770	chr13	55453106	55453171	+	65	1	Mir6943
NR_106201	NR_106201	102466888	chr3	95139060	95139186	-	126	2	Mir8099-2

## Sheet: IKZF1_Runx_unique_genes
Transcript/RepeatID	Gene ID (cmd=analyzeRNA.pl rna mm10 -d Documents/Basespace/Tina-33488506/Tagdirs-Tina/T1-CLP_-_-/)	GeneID	chr	start	end	strand	Length	Copies	Annotation/Divergence
NM_015729	NM_015729	11430	chr11	116171883	116199045	-	3976	1	Acox1
NM_009601	NM_009601	11443	chr11	69784036	69795937	-	2136	1	Chrnb1
NM_009609	NM_009609	11465	chr11	120345687	120348495	-	1900	1	Actg1
NM_009628	NM_009628	11538	chr2	168180965	168207112	-	4947	1	Adnp
NM_007453	NM_007453	11758	chr1	161240112	161251210	-	2371	1	Prdx6
NM_009679	NM_009679	11773	chr16	20535480	20544909	+	2924	1	Ap2m1
NM_021392	NM_021392	11781	chr5	138172021	138178685	+	1699	1	Ap4m1
NM_007537	NM_007537	12050	chr14	54883425	54888234	+	3455	1	Bcl2l2
NM_013483	NM_013483	12231	chr13	23456993	23465901	-	3438	1	Btn1a1
NM_007610	NM_007610	12366	chr6	42264985	42282508	+	3516	1	Casp2
NM_009828	NM_009828	12428	chr3	36564865	36571996	-	2801	1	Ccna2
NM_007649	NM_007649	12506	chr1	171682055	171705257	+	1136	1	Cd48
NM_009870	NM_009870	12567	chr10	127063603	127067282	+	1336	1	Cdk4
NM_007685	NM_007685	12627	chr1	34535648	34544311	+	1030	1	Cfc1
NM_007718	NM_007718	12770	chr9	123976949	123978408	-	1458	1	Ccr1l1
NM_007721	NM_007721	12777	chr11	101172998	101175443	-	1721	1	Ccr10
NM_009938	NM_009938	12847	chr1	172082529	172122332	+	4594	1	Copa
NM_007806	NM_007806	13057	chr8	122424771	122432940	-	751	1	Cyba
NM_001190474	NM_001190474	13144	chr10	81183007	81193197	+	1717	1	Dapk3
NM_007831	NM_007831	13176	chr18	71253632	72351069	-	10294	1	Dcc
NM_007858	NM_007858	13367	chr18	37843601	37935423	-	5584	1	Diaph1
NM_010065	NM_010065	13429	chr2	32308471	32353329	-	3786	1	Dnm1
NM_010170	NM_010170	14064	chr13	95696920	95702768	+	2460	1	F2rl2
NM_007990	NM_007990	14109	chr19	6057888	6059524	+	567	1	Fau
NM_010214	NM_010214	14202	chr10	85097019	85102495	-	2666	1	Fhl4
NM_008089	NM_008089	14460	chrX	7959260	7967910	-	1894	1	Gata1
NM_010261	NM_010261	14470	chr7	24969750	24972728	-	868	1	Rabac1
NM_008120	NM_008120	14612	chr4	127311420	127314039	-	1682	1	Gja4
NM_008160	NM_008160	14775	chr9	108339080	108340344	+	1043	1	Gpx1
NM_008180	NM_008180	14854	chr2	155563181	155592810	-	1948	1	Gss
NM_030678	NM_030678	14936	chr7	45434839	45456617	+	3663	1	Gys1
NM_145713	NM_145713	14957	chr13	23555032	23555807	+	773	1	Hist1h1d
NM_010419	NM_010419	15208	chr4	154960923	154962371	+	1268	1	Hes5
NM_010421	NM_010421	15211	chr9	59539667	59565105	+	1849	1	Hexa
NM_010443	NM_010443	15369	chr16	4741613	4766249	+	1247	1	Hmox2
NM_010560	NM_010560	16195	chr13	112464070	112506860	+	5433	1	Il6st
NM_008389	NM_008389	16351	chr4	116507549	116538235	+	2107	1	Ipp
NM_010577	NM_010577	16402	chr15	103344286	103366791	-	4378	1	Itga5
NM_008398	NM_008398	16404	chr10	128933813	128958284	+	3993	1	Itga7
NM_010589	NM_010589	16453	chr8	71676383	71690577	+	3907	1	Jak3
NM_001271687	NM_001271687	16516	chr16	95257558	95300258	+	5201	1	Kcnj15
NM_008519	NM_008519	16995	chr14	55765962	55768492	+	1388	1	Ltb4r1
NM_008540	NM_008540	17128	chr18	73639013	73703741	-	3327	1	Smad4
NM_010772	NM_010772	17188	chr7	127022137	127026479	-	2364	1	Maz
NM_008566	NM_008566	17218	chr8	75109509	75128439	+	3422	1	Mcm5
NM_008715	NM_008715	18130	chr14	62676325	62761112	-	4977	1	Ints6
NM_016714	NM_016714	18141	chr15	84923428	84942963	+	4739	1	Nup50
NM_053074	NM_053074	18226	chr7	44816088	44831836	+	3742	1	Nup62
NM_001177659	NM_001177659	18286	chr2	29889720	29931746	+	3882	1	Odf2
NM_011032	NM_011032	18453	chr11	120560304	120572936	-	2525	1	P4hb
NM_013626	NM_013626	18484	chr1	97821094	98095632	-	4075	1	Pam
NM_016768	NM_016768	18516	chr2	34171457	34372045	-	2843	1	Pbx3
NM_001103165	NM_001103165	18521	chr15	102470632	102500059	+	2851	1	Pcbp2
NM_001164677	NM_001164677	18571	chr9	113651744	113708259	-	5946	1	Pdcd6ip
NM_008801	NM_008801	18582	chr1	86543015	86582501	-	1085	1	Pde6d
NM_008825	NM_008825	18640	chr1	130692255	130715821	-	7291	1	Pfkfb2
NM_008857	NM_008857	18759	chr3	30995771	31052740	+	4445	1	Prkci
NM_177568	NM_177568	18796	chr2	118707517	118728438	-	5111	1	Plcb2
NM_008921	NM_008921	19075	chr10	128015215	128030030	+	1518	1	Prim1
NM_008952	NM_008952	19193	chr11	77880615	77893872	-	1764	1	Pipox
NM_008963	NM_008963	19215	chr2	25466712	25469749	-	796	1	Ptgds
NM_011200	NM_011200	19243	chr1	30940303	30949755	-	4121	1	Ptp4a1
NM_019933	NM_019933	19258	chr1	119658093	119837071	-	4677	1	Ptpn4
NM_008993	NM_008993	19301	chr5	110274286	110286168	-	1012	1	Pxmp2
NM_024448	NM_024448	19328	chr17	66494512	66519670	-	2002	1	Rab12
NM_024456	NM_024456	19345	chr11	100715003	100738215	-	1913	1	Rab5c
NM_001297606	NM_001297606	19358	chr8	84834652	84840665	-	2090	1	Rad23a
NM_009015	NM_009015	19366	chr4	116096955	116123689	-	3055	1	Rad54l
NM_011239	NM_011239	19385	chr16	18239979	18248694	-	844	1	Ranbp1
NM_001291078	NM_001291078	19708	chr19	5896516	5912871	-	3342	1	Dpf2
NM_011279	NM_011279	19823	chr9	96470937	96478675	-	1227	1	Rnf7
NM_019642	NM_019642	20014	chr2	157279098	157326318	+	2697	1	Rpn2
NM_011295	NM_011295	20042	chr10	23785183	23787209	-	510	1	Rps12
NM_009118	NM_009118	20215	chr1	87803680	87845157	+	1700	1	Sag
NM_009137	NM_009137	20299	chr8	94745684	94751388	+	1806	1	Ccl22
NM_009145	NM_009145	20320	chr9	58582240	58652879	+	2067	1	Nptn
NM_001164481	NM_001164481	20469	chr19	5651185	5663707	-	3848	1	Sipa1
NM_009211	NM_009211	20588	chr9	110132024	110240178	+	5643	1	Smarcc1
NM_021335	NM_021335	20639	chr2	143063069	143072052	+	1221	1	Snrpb2
NM_009235	NM_009235	20670	chr11	69655037	69656727	+	1134	1	Sox15
NM_009256	NM_009256	20723	chr13	33004541	33017955	+	3388	1	Serpinb9
NM_001204201	NM_001204201	20750	chr5	104435111	104441053	+	1466	1	Spp1
NM_011483	NM_011483	20834	chr17	56511248	56512483	-	1233	1	Znrf4
NM_011513	NM_011513	20933	chr2	26905267	26910642	-	3461	1	Med22
NM_001277958	NM_001277958	21339	chr1	183388985	183410206	+	2369	1	Taf1a
NM_025289	NM_025289	21376	chr9	37649182	37657312	-	1554	1	Tbrg1
NM_009326	NM_009326	21400	chr2	181680310	181688051	+	1151	1	Tcea2
NM_009336	NM_009336	21427	chr3	95111042	95123051	+	1428	1	Vps72
NM_001105667	NM_001105667	21915	chr1	93792576	93801934	-	996	1	Dtymk
NM_009438	NM_009438	22121	chr7	45125563	45128745	-	1016	1	Rpl13a
NM_009443	NM_009443	22134	chr6	72608421	72617000	-	5018	1	Tgoln1
NM_019883	NM_019883	22186	chr8	70508266	70510367	-	488	1	Uba52
NM_019668	NM_019668	22209	chrX	36874295	36884220	+	1722	1	Ube2a
NM_009458	NM_009458	22210	chr11	51985146	52000466	-	2117	1	Ube2b
NM_025352	NM_025352	22272	chr11	53428948	53430831	-	495	1	Uqcrq
NM_025407	NM_025407	22273	chr9	108936648	108949641	+	1641	1	Uqcrc1
NM_011706	NM_011706	22368	chr11	62574486	62600305	+	2733	1	Trpv2
NM_016852	NM_016852	22378	chr11	116078573	116086964	-	1785	1	Wbp2
NM_011765	NM_011765	22759	chr17	17121383	17146878	+	2757	1	Zfp97
NM_001025597	NM_001025597	22778	chr11	11685925	11772926	+	5441	1	Ikzf1
NM_011794	NM_011794	23827	chr1	185332159	185357769	+	2171	1	Bpnt1
NM_011854	NM_011854	23962	chr5	114896934	114912245	+	3128	1	Oasl2
NM_011873	NM_011873	23994	chr15	100615662	100620761	+	1816	1	Dazap2
NM_011874	NM_011874	23996	chr7	28041702	28050092	-	1423	1	Psmc4
NM_011886	NM_011886	24045	chr3	89177391	89182770	+	1565	1	Scamp3
NM_011900	NM_011900	24070	chr11	69656699	69662649	-	1317	1	Mpdu1
NM_175770	NM_175770	24074	chr18	37640491	37644204	-	3298	1	Taf7
NM_011910	NM_011910	24111	chr4	150997097	151001810	+	532	1	Uts2
NM_025296	NM_025296	26371	chr2	127240938	127247816	-	3066	1	Ciao1
NM_008927	NM_008927	26395	chr9	64185793	64253605	-	2374	1	Map2k1
NR_033442	NR_033442	26428	chr2	48902754	48949267	-	4061	1	Orc4
NM_011962	NM_011962	26433	chr5	136987019	136996646	+	3257	1	Plod3
NM_011981	NM_011981	26466	chr7	30095076	30107614	+	3711	1	Zfp260
NM_012002	NM_012002	26893	chr5	138161102	138163984	+	1082	1	Cops6
NM_013729	NM_013729	27217	chr1	180693048	180697034	-	2285	1	Mixl1
NM_013733	NM_013733	27221	chr17	56040416	56068026	+	3292	1	Chaf1a
NM_025301	NM_025301	27397	chr7	105803782	105811087	-	6707	1	Mrpl17
NM_013795	NM_013795	27425	chr9	44913248	44920742	-	508	1	Atp5l
NM_023665	NM_023665	27981	chr4	134923625	134927370	+	1408	1	Rsrp1
NM_138592	NM_138592	28035	chr6	72318676	72345175	-	2222	1	Usp39
NM_145353	NM_145353	28064	chr17	46248080	46252537	+	2024	1	Yipf3
NM_013919	NM_013919	30941	chr1	171281953	171287961	-	2166	1	Usp21
NM_015799	NM_015799	50765	chr5	137569840	137588081	+	3515	1	Tfr2
NM_016698	NM_016698	50849	chr5	115241770	115272895	-	3093	1	Rnf10
NM_001045959	NM_001045959	50932	chr11	70562881	70614482	+	4939	1	Mink1
NM_016750	NM_016750	51788	chr3	137864487	137866922	+	1062	1	H2afz
NM_026023	NM_026023	52653	chr11	40733661	40740046	+	1577	1	Nudcd2
NM_027570	NM_027570	52815	chr8	111626271	111630322	-	2208	1	Ldhd
NM_016876	NM_016876	53356	chr9	20894349	20898590	-	1055	1	Eif3g
NM_001285825	NM_001285825	53607	chr7	27187006	27196271	-	1354	1	Snrpa
NM_023144	NM_023144	53610	chrX	101429651	101448593	+	2454	1	Nono
NM_016926	NM_016926	53890	chr5	113742446	113771649	-	3565	1	Sart3
NM_181649	NM_181649	53951	chr17	78835516	78848308	+	4195	1	Gpatch11
NM_017395	NM_017395	53970	chr3	94955015	94961561	+	4178	1	Rfx5
NM_016851	NM_016851	54139	chr1	193153112	193172035	+	4114	1	Irf6
NM_001291248	NM_001291248	54188	chr5	145167213	145182041	+	1706	1	Cpsf4
NM_017465	NM_017465	54200	chr7	45729983	45759555	-	1127	1	Sult2b1
NM_019461	NM_019461	54651	chrX	7372591	7375830	-	3237	1	Usp27x
NM_019487	NM_019487	56016	chr10	18540123	18546076	-	1904	1	Hebp2
NM_023871	NM_023871	56086	chr2	30061996	30072577	+	2671	1	Set
NM_019868	NM_019868	56258	chrX	134601179	134607057	+	2468	1	Hnrnph2
NM_019637	NM_019637	56291	chr14	45351186	45376884	+	4245	1	Styx
NM_019640	NM_019640	56305	chr5	111330697	111388359	+	2813	1	Pitpnb
NM_019767	NM_019767	56443	chr5	145083869	145108756	+	1576	1	Arpc1a
NM_019652	NM_019652	56495	chr8	85017931	85025278	-	1244	1	Asna1
NM_001039347	NM_001039347	56543	chr3	105452330	105674002	+	7160	1	Kcnd3
NM_001190321	NM_001190321	56620	chr6	123229843	123247024	+	1136	1	Clec4n
NM_203280	NM_203280	56632	chr7	45709463	45718002	-	3543	1	Sphk2
NM_020582	NM_020582	57423	chr5	145183706	145191592	-	471	1	Atp5j2
NM_020590	NM_020590	57436	chr6	129533192	129542331	+	1767	1	Gabarapl1
NM_020585	NM_020585	57437	chr8	23241326	23257080	-	2024	1	Golga7
NM_001253832	NM_001253832	58249	chr19	5460607	5465052	+	1228	1	Fibp
NM_021513	NM_021513	59016	chr8	105855103	105856950	+	1845	1	Thap11
NM_021547	NM_021547	59045	chr11	98358368	98381112	+	2066	1	Stard3
NM_021715	NM_021715	60322	chrX	20059570	20097520	+	2191	1	Chst7
NM_023055	NM_023055	65962	chr17	24639282	24650305	-	2109	1	Slc9a3r2
NM_025334	NM_025334	66073	chr4	108834678	108862119	+	1265	1	Txndc12
NM_175101	NM_175101	66087	chr6	113514887	113531638	-	1948	1	Emc3
NM_025349	NM_025349	66094	chr10	80852825	80855209	-	462	1	Lsm7
NM_025366	NM_025366	66121	chr14	20703027	20704425	+	590	1	Chchd1
NM_025383	NM_025383	66147	chr4	141066512	141078345	-	1884	1	Necap2
NM_001290660	NM_001290660	66205	chr2	60251993	60284484	-	1342	1	Cd302
NM_175104	NM_175104	66306	chr18	34758906	34773760	+	4468	1	Fam53c
NM_025507	NM_025507	66354	chr12	87449910	87472299	-	2241	1	Snw1
NM_025511	NM_025511	66359	chr1	178319153	178322693	+	442	1	Cox20
NM_023202	NM_023202	66416	chr17	33824572	33838316	+	521	1	Ndufa7
NM_025624	NM_025624	66537	chr5	147860628	147875778	+	726	1	Pomp
NM_025638	NM_025638	66569	chr11	87033794	87074137	-	2472	1	Gdpd1
NM_025641	NM_025641	66576	chr4	116066965	116075070	-	540	1	Uqcrh
NM_025642	NM_025642	66578	chr16	90719312	90727371	-	1293	1	Mis18a
NM_023229	NM_023229	66587	chr5	24441040	24445235	-	1828	1	Fastk
NM_001080969	NM_001080969	66628	chr11	45945306	45955503	-	3788	1	Thg1l
NM_025698	NM_025698	66676	chr18	46585928	46597535	-	3447	1	Tmed7
NM_025699	NM_025699	66680	chr2	163405822	163419470	-	1556	1	Oser1
NM_025725	NM_025725	66717	chr5	36484588	36488171	+	3581	1	Ccdc96
NM_025729	NM_025729	66724	chrX	85574022	85634469	+	6353	1	Tab3
NR_033782	NR_033782	66730	chr2	179976853	179979013	+	1903	1	4921531C22Rik
NM_025774	NM_025774	66801	chr5	136180357	136198954	-	1646	1	Prkrip1
NM_025788	NM_025788	66830	chr8	84670479	84687862	-	4296	1	Nacc1
NM_025799	NM_025799	66848	chr10	13501028	13517275	+	3945	1	Fuca2
NM_175113	NM_175113	66926	chr2	132804215	132816054	-	2807	1	Trmt6
NM_025879	NM_025879	66975	chr13	104142153	104178466	-	3534	1	Trappc13
NM_025993	NM_025993	67139	chr11	71019611	71027134	+	2761	1	Mis12
NR_028298	NR_028298	67170	chr6	86848407	86849440	-	1033	1	2610306M01Rik
NM_026013	NM_026013	67171	chr3	106547798	106575341	+	2711	1	Dram2
NM_026020	NM_026020	67186	chr7	141447650	141451342	+	434	1	Rplp2
NM_030240	NM_030240	67278	chr7	127015051	127017352	-	1407	1	Pagr1a
NM_001005385	NM_001005385	67298	chrX	135742692	135803468	+	5663	1	Gprasp1
NM_026091	NM_026091	67326	chr2	131146325	131160020	-	1233	1	1700037H04Rik
NM_026127	NM_026127	67392	chr13	119462759	119486117	+	2621	1	4833420G17Rik
NM_026158	NM_026158	67441	chr7	4844960	4866179	-	1057	1	Isoc2b
NM_026186	NM_026186	67480	chr11	97745470	97766613	-	3295	1	Cwc25
NM_026201	NM_026201	67500	chr10	62743928	62792368	-	4451	1	Ccar1
NM_026211	NM_026211	67511	chr13	55593135	55597694	+	1444	1	Tmed9
NM_026217	NM_026217	67526	chr18	46732417	46741579	-	2486	1	Atg12
NM_001170433	NM_001170433	67533	chr6	146888494	147032023	+	4845	1	Ppfibp1
NM_026260	NM_026260	67590	chr19	40596446	40612215	-	2709	1	Tctn3
NR_027978	NR_027978	67640	chr18	77714184	77715445	+	1261	1	4930465K10Rik
NR_027872	NR_027872	67642	chr5	114773733	114774983	-	1250	1	4930515G01Rik
NM_026327	NM_026327	67708	chr12	72536357	72580213	+	4407	1	Pcnxl4
NM_026329	NM_026329	67710	chr19	8793129	8798557	-	858	1	Polr2g
NM_026369	NM_026369	67771	chr1	152766542	152775580	+	1891	1	Arpc5
NM_144520	NM_144520	67815	chr11	4097040	4118729	-	2514	1	Sec14l2
NM_024210	NM_024210	67862	chr11	59208361	59210734	+	1232	1	2310033P09Rik
NM_001164575	NM_001164575	67911	chr13	48487660	48513410	-	4147	1	Zfp169
NM_026473	NM_026473	67951	chr18	67390731	67402749	+	1738	1	Tubb6
NM_026651	NM_026651	68273	chr4	116150518	116159844	+	2695	1	Pomgnt1
NM_026670	NM_026670	68310	chr4	127047094	127061132	-	3822	1	Zmym1
NM_026720	NM_026720	68423	chr19	4270180	4283137	-	2124	1	Ankrd13d
NR_027943	NR_027943	68763	chr17	34950236	34952468	-	581	1	1110038B12Rik
NM_177783	NM_177783	68795	chr2	69897246	70024010	+	8028	1	Ubr3
NM_175136	NM_175136	68867	chr8	31111846	31131473	+	3539	1	Rnf122
NM_026861	NM_026861	68889	chr14	121878606	122021035	+	2143	1	Ubac2
NM_026885	NM_026885	68953	chr7	13032006	13034777	-	919	1	Chmp2a
NM_026936	NM_026936	69089	chr14	54360841	54369669	+	2522	1	Oxa1l
NM_026940	NM_026940	69101	chr16	17146967	17148857	+	1313	1	Ydjc
NM_027013	NM_027013	69269	chr3	95129719	95134012	-	863	1	Scnm1
NR_045476	NR_045476	69320	chr11	59725917	59740154	-	1105	1	1700007J10Rik
NM_027085	NM_027085	69454	chr2	25456843	25458772	+	791	1	Clic3
NM_027144	NM_027144	69632	chr9	42963842	43105718	-	10440	1	Arhgef12
NM_197991	NM_197991	69683	chr7	44489938	44496513	-	1846	1	Emc10
NM_001081406	NM_001081406	69706	chr12	69168814	69179010	+	1495	1	Lrr1
NR_038151	NR_038151	69749	chr18	33794892	33795989	+	430	1	Epb41l4aos
NM_027207	NM_027207	69770	chr10	80172944	80175119	+	646	1	1600002K03Rik
NM_178619	NM_178619	69773	chr9	21592722	21595970	+	3166	1	1810026J23Rik
NM_027231	NM_027231	69833	chr15	79141367	79151767	+	513	1	Polr2f
NR_027981	NR_027981	69862	chr9	22206786	22213860	-	2300	1	1810064F22Rik
NM_027257	NM_027257	69917	chr10	128401395	128409796	-	1043	1	Nabp2
NM_027283	NM_027283	69987	chr2	28692080	28699651	-	664	1	1700026L06Rik
NM_023547	NM_023547	70020	chr6	83121828	83125029	-	1032	1	Ino80b
NR_028124	NR_028124	70281	chr15	99972167	99973287	-	1120	1	2310068J16Rik
NM_145822	NM_145822	70333	chr7	19356009	19359483	-	2241	1	Cd3eap
NM_032544	NM_032544	70359	chr8	71488103	71493400	+	2789	1	Gtpbp3
NR_045341	NR_045341	70538	chr10	41568016	41576476	+	613	1	5730435O14Rik
NM_173443	NM_173443	70675	chr1	9718622	9748382	-	9744	1	Vcpip1
NM_027534	NM_027534	70750	chr1	106720410	106759742	-	5570	1	Kdsr
NM_027600	NM_027600	70909	chr2	19462837	19553910	-	1985	1	4921504E06Rik
NR_038172	NR_038172	70934	chr12	69843686	69853671	+	1848	1	4931403G20Rik
NR_103550	NR_103550	71416	chr13	80940403	80948597	+	1248	1	5430425K12Rik
NM_001172068	NM_001172068	71599	chr9	59734259	59750649	-	3879	1	Senp8
NM_027889	NM_027889	71732	chr9	44348105	44361670	-	3162	1	Vps11
NM_027920	NM_027920	71779	chr6	116338022	116409541	+	4614	1	March8
NM_001252466	NM_001252466	71810	chr17	56673225	56711769	+	2693	1	Ranbp3
NM_028014	NM_028014	71947	chr11	115765433	115799033	+	4962	1	Tmem94
NM_028037	NM_028037	71985	chr5	121621029	121660510	-	3598	1	Acad10
NM_031373	NM_031373	72075	chr2	180589407	180595837	+	2279	1	Ogfr
NM_001081085	NM_001081085	72080	chr2	25372035	25378213	+	3398	1	Sapcd2
NM_028136	NM_028136	72162	chr3	62468642	62506988	-	4948	1	Dhx36
NM_028140	NM_028140	72175	chr3	40818172	40846854	-	3037	1	Mfsd8
NM_028153	NM_028153	72205	chr7	19181170	19206482	+	2291	1	Eml2
NM_028183	NM_028183	72282	chr3	36475937	36482299	+	906	1	1810062G17Rik
NM_001033528	NM_001033528	72344	chr11	118259653	118290244	-	5586	1	Usp36
NM_028317	NM_028317	72668	chr2	18044087	18048449	-	4360	1	Skida1
NM_023684	NM_023684	72699	chr2	181381235	181383628	+	1952	1	Lime1
NM_028417	NM_028417	73032	chr7	27653924	27656207	+	899	1	Ttc9b
NM_080793	NM_080793	73251	chr3	51515318	51560823	-	7346	1	Setd7
NM_028481	NM_028481	73254	chr5	108132914	108232949	+	4626	1	Ccdc18
NM_001271575	NM_001271575	73603	chr2	164470304	164473724	-	924	1	Trp53tg5
NR_045537	NR_045537	73658	chr7	126370060	126377934	-	2669	1	Spns1
NM_028634	NM_028634	73739	chr15	79659227	79667660	+	1112	1	Cby1
NM_028792	NM_028792	74158	chr15	79674250	79687872	-	3388	1	Josd1
NM_023743	NM_023743	74203	chr11	3202583	3244588	+	3673	1	Eif4enif1
NM_028865	NM_028865	74319	chr11	116843515	116849740	+	1032	1	Mettl23
NM_001080981	NM_001080981	74351	chr15	98645507	98662889	-	2796	1	Ddx23
NM_023750	NM_023750	74352	chr7	29768552	29781419	+	5704	1	Zfp84
NM_172418	NM_172418	74490	chr7	45639977	45645768	+	2167	1	Mamstr
NR_040734	NR_040734	74633	chr9	79793641	79803235	+	1517	1	4930429F24Rik
NM_028848	NM_028848	74717	chr1	187048407	187215446	-	1291	1	Spata17
NR_046281	NR_046281	74995	chr11	84829178	84830868	+	752	1	4930502E09Rik
NM_029271	NM_029271	75398	chr13	14610301	14613037	-	763	1	Mrpl32
NM_029294	NM_029294	75456	chr12	34984761	34986436	+	1673	1	Prps1l1
NM_001037841	NM_001037841	75458	chr8	104250861	104264936	+	1866	1	Cklf
NM_029365	NM_029365	75613	chr7	44879386	44892366	-	2251	1	Med25
NM_001290569	NM_001290569	75660	chr7	30555441	30559646	-	1113	1	Lin37
NM_029444	NM_029444	75801	chr12	72881109	72917765	-	1890	1	4930447C04Rik
NM_029453	NM_029453	75820	chr1	175698593	175815733	+	3786	1	Wdr64
NM_175226	NM_175226	75841	chr15	58889229	58902390	+	4344	1	Rnf139
NM_001145759	NM_001145759	75861	chr7	125368861	125371013	+	2150	1	4930571K23Rik
NM_029502	NM_029502	76025	chr11	118406289	118419118	-	3084	1	Cant1
NM_029580	NM_029580	76357	chr12	73280410	73286711	-	1662	1	Trmt5
NM_029706	NM_029706	76703	chr3	20249484	20275729	-	1481	1	Cpb1
NM_029742	NM_029742	76788	chr6	30401855	30455174	+	5925	1	Klhdc10
NM_029748	NM_029748	76799	chr4	129600707	129607879	+	754	1	Tmem234
NM_029814	NM_029814	76959	chr4	40948553	40965302	+	1362	1	Chmp5
NM_148929	NM_148929	77031	chr2	167421710	167477000	+	4504	1	Slc9a8
NM_175251	NM_175251	77044	chr15	96287522	96405463	+	9006	1	Arid2
NM_175265	NM_175265	77744	chr14	99046377	99074107	+	2279	1	Bora
NM_029977	NM_029977	77782	chr16	37011786	37095417	+	8520	1	Polq
NM_133777	NM_133777	77891	chr7	4808014	4812340	-	982	1	Ube2s
NM_030046	NM_030046	78244	chr15	10446763	10470516	-	2039	1	Dnajc21
NM_001166364	NM_001166364	78323	chr9	57537528	57543187	+	3048	1	Fam219b
NM_030093	NM_030093	78372	chr11	32205415	32208995	+	825	1	Snrnp25
NM_001253704	NM_001253704	78428	chr10	128748455	128766568	+	1214	1	Pym1
NM_001289781	NM_001289781	78697	chr5	23740165	23779663	-	4223	1	Pus7
NM_030184	NM_030184	78795	chr1	86154780	86278284	+	5130	1	Armc9
NM_024290	NM_024290	79201	chr7	143665807	143685875	-	3278	1	Tnfrsf23
NM_058214	NM_058214	79456	chr15	76703553	76710559	-	3898	1	Recql4
NM_030253	NM_030253	80285	chr16	35938470	35972621	+	3551	1	Parp9
NM_178637	NM_178637	81601	chr19	5603014	5610094	-	1995	1	Kat5
NM_020625	NM_020625	81630	chr17	33916176	33919325	+	2603	1	Zbtb22
NM_001128597	NM_001128597	81845	chr17	35121496	35124815	+	1501	1	Gpank1
NR_110360	NR_110360	83679	chr3	97738844	97768014	-	6697	1	Pde4dip
NM_032397	NM_032397	84036	chr8	70842049	70857008	-	4030	1	Kcnn1
NM_033580	NM_033580	93705	chr18	37761801	37841872	+	4611	1	Pcdhgb8
NM_033607	NM_033607	93841	chr9	64235201	64236362	+	1159	1	Uchl4
NM_001277893	NM_001277893	94244	chr5	135291704	135350044	-	1317	1	Fkbp6
NM_145079	NM_145079	94284	chr1	88134809	88220002	+	3294	1	Ugt1a6a
NM_054045	NM_054045	97114	chr3	96246700	96247348	+	646	2	Hist2h3c2
NM_133794	NM_133794	97541	chr9	108508005	108515941	+	2475	1	Qars
NM_153555	NM_153555	98193	chr1	172148015	172196393	+	3727	1	Dcaf8
NM_001287087	NM_001287087	99650	chr3	90051636	90063341	+	2656	1	4933434E20Rik
NM_133918	NM_133918	100952	chr5	30913786	30921273	+	3454	1	Emilin1
NM_133931	NM_133931	101185	chr6	25743735	25809226	-	3133	1	Pot1a
NM_053194	NM_053194	101489	chr7	140857397	140863731	+	2955	1	Ric8
NM_198011	NM_198011	101604	chr7	127390836	127393621	-	2158	1	E430018J23Rik
NM_133982	NM_133982	102614	chr9	57504102	57505447	+	1343	1	Rpp25
NM_145926	NM_145926	103534	chr11	50225335	50235103	+	2412	1	Mgat4b
NM_153596	NM_153596	103765	chr11	22512283	22519231	+	1364	1	Tmem17
NM_134058	NM_134058	105083	chr13	115088355	115090158	-	1568	1	Pelo
NM_001177633	NM_001177633	105428	chr14	20348162	20368564	+	1793	1	Fam149b
NM_134078	NM_134078	105513	chr14	69716979	69732570	-	2694	1	Chmp7
NM_134149	NM_134149	107242	chr19	5425144	5427316	+	1527	1	AI837181
NM_134155	NM_134155	107392	chr19	5041404	5049917	+	1326	1	Brms1
NM_026115	NM_026115	107435	chr2	71389260	71441622	+	1563	1	Hat1
NM_201256	NM_201256	108112	chr18	36664060	36666324	+	1146	1	Eif4ebp3
NM_139144	NM_139144	108155	chrX	101640051	101684351	+	5373	1	Ogt
NM_175399	NM_175399	109075	chr15	76327397	76330670	+	1784	1	Exosc4
NM_001163263	NM_001163263	109331	chr4	49632060	49656886	+	4290	1	Rnf20
NM_001033227	NM_001033227	109342	chr11	61672782	61720799	-	2243	1	Slc5a10
NM_001005506	NM_001005506	109658	chr4	129626077	129640805	-	4841	1	Txlna
NM_148934	NM_148934	110012	chr10	79669410	79676126	+	1097	1	Tpgs1
NM_029546	NM_029546	110816	chr10	78170910	78185149	-	3848	1	Pwp2
NM_130864	NM_130864	113868	chr9	119341294	119350295	+	1744	1	Acaa1a
NM_033617	NM_033617	114143	chr4	117884330	117887329	-	986	1	Atp6v0b
NM_033541	NM_033541	114643	chr5	120800199	120812514	-	2277	1	Oas1c
NM_001255993	NM_001255993	140629	chr2	130589996	130630038	-	3875	1	Ubox5
NM_080849	NM_080849	140859	chr11	78166106	78176666	-	2783	1	Nek8
NM_133217	NM_133217	170752	chr9	50533087	50555138	-	2061	1	Bco2
NM_133242	NM_133242	170791	chr2	156147241	156180238	-	2789	1	Rbm39
NM_138630	NM_138630	171207	chrX	73894352	73911298	-	3297	1	Arhgap4
NM_001081107	NM_001081107	191578	chr5	100762148	100798600	-	3668	1	Helq
NM_001033231	NM_001033231	192173	chr11	120542888	120549727	-	1198	1	Fam195b
NM_138753	NM_138753	192231	chr11	103116325	103119724	+	3397	1	Hexim1
NM_001290383	NM_001290383	207920	chr4	11331933	11386783	-	3948	1	Esrp1
NM_175436	NM_175436	210172	chr7	25221425	25227495	+	3363	1	Zfp526
NM_001289699	NM_001289699	210673	chr6	113493639	113501931	-	3783	1	Prrt3
NM_001253731	NM_001253731	210925	chr14	64950045	65039835	+	2690	1	Ints9
NM_001035231	NM_001035231	212276	chr13	67538641	67553152	-	4609	1	Zfp748
NM_145382	NM_145382	212483	chr13	55539316	55571120	-	4328	1	Fam193b
NM_145396	NM_145396	213773	chr17	24700653	24707653	-	2491	1	Tbl3
NM_145406	NM_145406	214601	chrX	74369219	74373349	-	2016	1	Slc10a3
NM_172539	NM_172539	215095	chr2	127338639	127357656	+	2371	1	Astl
NM_145416	NM_145416	215194	chr9	21273457	21287969	-	2577	1	Kri1
NM_172259	NM_172259	216459	chr10	128494157	128498685	-	1017	1	Myl6b
NM_001033598	NM_001033598	216739	chr11	54303824	54361539	+	2538	1	Acsl6
NM_146026	NM_146026	217138	chr11	96929324	96935647	+	1357	1	Prr15l
NM_172565	NM_172565	217194	chr11	100462612	100472782	-	2432	1	Klhl11
NM_001098836	NM_001098836	217218	chr11	102289300	102296629	-	3692	1	Atxn7l3
NM_177622	NM_177622	218314	chr13	67312998	67332560	-	3902	1	Zfp595
NM_001033274	NM_001033274	223770	chr15	88687035	88734219	-	5122	1	Brd1
NM_001166066	NM_001166066	223825	chr15	4898737	4962201	+	5186	1	Mroh2b
NM_146071	NM_146071	224116	chr16	32785784	32797435	-	2549	1	Muc20
NM_172635	NM_172635	225929	chr19	11912399	11945096	+	4200	1	Patl1
NM_153064	NM_153064	226646	chr1	171234853	171247122	-	1608	1	Ndufs2
NM_177648	NM_177648	227697	chr2	30284229	30286354	-	2123	1	Dolk
NM_146121	NM_146121	227800	chr2	37443285	37566437	+	4939	1	Rabgap1
NM_173396	NM_173396	228839	chr2	156840007	156855569	+	2894	1	Tgif2
NM_178696	NM_178696	229517	chr3	88410494	88425141	-	3578	1	Slc25a44
NM_198026	NM_198026	230767	chr4	129615617	129619093	-	2135	1	Iqcc
NM_001013756	NM_001013756	230824	chr4	135541888	135573620	-	2761	1	Grhl3
NM_001007574	NM_001007574	231570	chr5	107497745	107512556	+	6748	1	A830010M20Rik
NM_144913	NM_144913	231803	chr5	137781906	137786701	-	3160	1	Mepce
NM_177686	NM_177686	232413	chr6	129350244	129365303	+	2214	1	Clec12a
NM_175021	NM_175021	233033	chr7	28399522	28436191	-	4376	1	Samd4b
NM_173738	NM_173738	233057	chr7	29843936	29853648	-	2757	1	Zfp940
NM_178704	NM_178704	233115	chr7	35685500	35754454	-	7650	1	Dpy19l3
NM_001033040	NM_001033040	233899	chr7	127582383	127588595	-	2525	1	Ccdc189
NM_001030290	NM_001030290	235033	chr9	20818504	20826163	+	1442	1	Rdh8
NM_001291448	NM_001291448	235169	chr9	35204221	35211055	-	2263	1	Foxred1
NM_146229	NM_146229	235661	chr9	114688831	114723777	+	2020	1	Dync1li1
NM_198615	NM_198615	237400	chr10	80380355	80387651	-	3254	1	Mex3d
NM_177354	NM_177354	238328	chr12	86678700	86695681	+	6180	1	Vash1
NM_001007575	NM_001007575	238693	chr13	67490167	67500522	-	2353	1	Zfp58
NM_001081680	NM_001081680	238722	chr13	74371426	74376566	-	1624	1	Zfp72
NM_172807	NM_172807	238831	chr13	104205122	104228844	-	2353	1	Ppwd1
NM_001205095	NM_001205095	240038	chr17	22197265	22225614	-	4873	1	Gm4944
NM_173423	NM_173423	240263	chr18	46504606	46525971	-	2861	1	Fem1c
NM_173770	NM_173770	240479	chr18	84720242	84740436	+	2146	1	Fam69c
NM_175507	NM_175507	240660	chr19	38395980	38405607	+	3466	1	Slc35g1
NM_198619	NM_198619	242747	chr4	147822986	147848375	-	4241	1	Zfp933
NM_001289693	NM_001289693	243967	chr7	45684022	45694556	+	1752	1	Ntn5
NM_001013384	NM_001013384	244550	chr8	84125989	84132517	+	2068	1	Podnl1
NM_001286454	NM_001286454	244646	chr8	109614517	109672592	+	6542	1	Pkd1l3
NM_001024206	NM_001024206	245828	chr11	69323986	69325793	+	738	1	Trappc1
NM_138670	NM_138670	246221	chr15	78407104	78414015	+	1421	1	Mpst
NM_145746	NM_145746	252868	chr11	68921835	68927081	-	1103	1	Odf4
NM_146717	NM_146717	258712	chr1	174041933	174042936	+	1001	1	Olfr433
NM_174852	NM_174852	268448	chr11	77982816	78030535	+	4375	1	Phf12
NM_172947	NM_172947	268490	chr11	102163489	102185256	-	1217	1	Lsm12
NM_194346	NM_194346	268749	chr14	55591790	55603671	+	3358	1	Rnf31
NM_175546	NM_175546	268752	chr14	62837690	62956886	+	1997	1	Wdfy2
NM_001004366	NM_001004366	268935	chr17	28142526	28171345	+	2959	1	Scube3
NM_172967	NM_172967	269033	chr18	70453140	70472480	-	2280	1	4930503L19Rik
NM_172991	NM_172991	269623	chr5	3583978	3596547	-	2323	1	Rbm48
NM_001081441	NM_001081441	269633	chr5	24712269	24730680	-	1778	1	Wdr86
NM_199311	NM_199311	269799	chr6	122921848	122934619	+	1550	1	Clec4a1
NM_173006	NM_173006	269823	chr6	5220852	5256233	-	1773	1	Pon3
NM_025887	NM_025887	271457	chr17	53479234	53507678	+	2356	1	Rab5a
NM_173450	NM_173450	271842	chr2	119034790	119042197	+	5129	1	Rpusd2
NM_181582	NM_181582	276770	chr11	69916712	69921386	-	1343	1	Eif5a
NM_181545	NM_181545	276950	chr11	83002158	83020810	-	4003	1	Slfn8
NM_175664	NM_175664	319178	chr13	23746734	23747223	+	487	1	Hist1h2bb
NM_001177653	NM_001177653	319179	chr13	23583670	23621094	-	2476	1	Hist1h2be
NM_178196	NM_178196	319181	chr13	23571400	23571863	+	461	1	Hist1h2bg
NM_175665	NM_175665	319184	chr13	22035821	22036320	+	497	1	Hist1h2bk
NM_178200	NM_178200	319186	chr13	21722044	21722526	+	480	1	Hist1h2bm
NM_001301204	NM_001301204	319446	chr8	105984946	105991773	-	1707	1	Dpep2
NM_001111076	NM_001111076	319535	chrX	21026184	21062038	-	5937	1	Zfp182
NM_176953	NM_176953	319583	chr8	9970020	9976323	-	4077	1	Lig4
NM_176982	NM_176982	319701	chr11	16951410	16954772	+	2111	1	Fbxo48
NM_001033383	NM_001033383	319748	chr7	5020376	5033223	+	3953	1	Zfp865
NM_001276489	NM_001276489	319909	chr2	139678178	139758581	+	2957	1	Ism1
NM_177081	NM_177081	320139	chr1	135132725	135145320	+	3252	1	Ptpn7
NM_177128	NM_177128	320299	chr16	36828400	36872715	+	2250	1	Iqcb1
NM_175652	NM_175652	320332	chr6	136803993	136804431	-	436	1	Hist4h4
NM_177150	NM_177150	320394	chr8	105844678	105852008	-	1752	1	Cenpt
NR_015582	NR_015582	320479	chr5	67463898	67470831	+	2758	1	C330024D21Rik
NR_104576	NR_104576	320609	chr6	29917013	29959680	+	5344	1	Strip2
NR_030699	NR_030699	320770	chr5	20950989	20956398	+	5409	1	A630072M18Rik
NR_033532	NR_033532	320871	chr7	141359178	141365110	-	2933	1	B230206H07Rik
NR_038037	NR_038037	327744	chr10	39621411	39732007	-	1661	1	E130307A14Rik
NM_001039536	NM_001039536	327942	chr11	62458460	62513900	+	1648	1	Pigl
NM_177805	NM_177805	328108	chr12	64965742	65022573	+	6412	1	Fam179b
NM_181345	NM_181345	328440	chr14	70647302	70653084	-	986	1	Npm2
NM_001034871	NM_001034871	328788	chr17	28549487	28552618	+	439	1	Clpsl2
NR_045332	NR_045332	331011	chr9	98748599	98820087	-	1480	1	E330023G01Rik
NM_001277132	NM_001277132	333670	chr10	75937723	75940672	-	1219	1	Gm867
NM_181423	NM_181423	338359	chr10	62429378	62449693	-	2373	1	Supv3l1
NR_002865	NR_002865	353373	chr4	132270079	132270186	-	107	1	Rnu11
NM_001145452	NM_001145452	381112	chr17	80307407	80388689	+	3241	1	Arhgef33
NM_025885	NM_025885	381379	chr2	84678402	84688215	+	2052	1	Med19
NR_029744	NR_029744	387222	chr6	31062660	31062747	-	87	1	Mir29a
NM_001162926	NM_001162926	399603	chr15	60818996	60825080	-	5559	1	Fam84b
NM_001076791	NM_001076791	408067	chr13	67471513	67484253	-	3766	1	Zfp874b
NM_001005223	NM_001005223	448850	chr11	84910955	84916356	-	976	1	Znhit3
NR_028363	NR_028363	613254	chr11	83291699	83294637	+	386	1	AA465934
NM_001077633	NM_001077633	620253	chr17	23917458	23919441	+	604	1	Dcpp3
NM_001037914	NM_001037914	622408	chr13	112993868	113000394	+	2345	1	Mcidas
NM_001037917	NM_001037917	622976	chrX	109196756	109200445	+	2797	1	Gm6377
NR_037190	NR_037190	624784	chr10	82629842	82650277	+	2888	1	Gm9855
NM_001039231	NM_001039231	626391	chr5	104813168	104860068	-	2896	1	Zfp951
NR_027829	NR_027829	666945	chr8	86745699	86747060	+	1361	1	Gm10638
NM_001100187	NM_001100187	677156	chr17	32621319	32636184	+	2627	1	Cyp4f37
NR_029792	NR_029792	723944	chr6	124718322	124718390	-	68	1	Mir200c
NR_030428	NR_030428	791073	chr7	127708487	127708562	+	75	1	Mir762
NR_045618	NR_045618	791294	chr5	90366997	90368488	+	1491	1	Gm9958
NM_001166213	NM_001166213	100037278	chr8	71597646	71608149	+	2465	1	Fam129c
NR_040560	NR_040560	100038453	chr3	108379277	108383741	-	2436	1	Gm12522
NR_033476	NR_033476	100038709	chr16	90142237	90146827	+	4590	1	Gm10789
NR_033536	NR_033536	100038712	chr1	192136898	192151025	+	2608	1	Gm10516
NR_003247	NR_003247	100038912	chr7	16649030	16657478	-	712	1	Ceacam-ps1
NM_001105254	NM_001105254	100039315	chr12	88175589	88181894	-	1887	1	Gm10436
NR_045598	NR_045598	100039495	chr6	145250552	145251856	+	884	1	Gm15706
NR_029468	NR_029468	100039864	chr4	132308678	132311024	+	601	1	Snhg12
NR_015538	NR_015538	100039957	chr19	8774485	8776962	+	2477	1	Gm2518
NM_001162910	NM_001162910	100041979	chr13	62367716	62383174	-	2913	1	Gm3604
NM_001166581	NM_001166581	100042165	chr5	104508352	104522383	+	5178	1	BC005561
NR_033452	NR_033452	100042757	chr18	42274380	42275197	-	414	1	Gm4013
NM_001024731	NM_001024731	100044193	chr17	94864918	94878321	+	2484	1	Gm20939
NR_034051	NR_034051	100217417	chr15	98519717	98519834	-	117	1	Snora34
NR_027448	NR_027448	100272219	chr2	25327450	25332571	-	1694	1	AA543186
NR_035450	NR_035450	100316688	chr10	44359676	44359768	+	92	1	Mir1929
NR_035466	NR_035466	100316833	chr16	11254368	11254445	-	77	1	Mir1945
NR_035475	NR_035475	100316834	chrX	77164403	77475936	-	75	1	Mir669m-2
NR_038018	NR_038018	100417125	chr10	99638731	99641920	-	2503	1	Gm18409
NR_045298	NR_045298	100502745	chr1	127753617	127774054	-	462	1	2900009J06Rik
NR_045268	NR_045268	100503178	chr8	123042575	123044602	+	2027	1	2810013P06Rik
NR_038023	NR_038023	100504616	chr10	120857629	120863328	+	2970	1	Gm15910
NR_037268	NR_037268	100526496	chr17	51277988	51613053	+	55	1	Mir669a-12
NR_045696	NR_045696	100689703	chr8	122443656	122446476	+	2820	1	9330133O14Rik
NR_105029	NR_105029	100862268	chr3	127161305	127168290	+	1832	1	LOC100862268
NR_105808	NR_105808	102465203	chr9	92267258	92267361	-	103	1	Mir6386
NR_105881	NR_105881	102465552	chr10	128511968	128512030	-	62	1	Mir6916
NR_105951	NR_105951	102465595	chr19	4263818	4263878	-	60	1	Mir6985
NR_105980	NR_105980	102465613	chr3	95004168	95004239	+	71	1	Mir7013
NR_106022	NR_106022	102465638	chr7	45173303	45173361	+	58	1	Mir7055
NR_106134	NR_106134	102465774	chr7	30589380	30589437	+	57	1	Mir3569
NR_106115	NR_106115	102466840	chr2	18057846	18057903	+	57	1	Mir7655
NR_105905	NR_105905	102466989	chr12	112733322	112733391	+	69	1	Mir6940

## Sheet: RUNX_unique_genes
Transcript/RepeatID	Gene ID (cmd=analyzeRNA.pl rna mm10 -d Documents/Basespace/Tina-33488506/Tagdirs-Tina/T1-CLP_-_-/)	GeneID	chr	start	end	strand	Length	Copies	Annotation/Divergence
NM_001198785	NM_001198785	11302	chr11	120007316	120047145	-	5392	1	Aatk
NM_021330	NM_021330	11431	chr12	30893326	30911612	-	3099	1	Acp1
NM_007387	NM_007387	11432	chr2	91202912	91214098	+	4640	1	Acp2
NM_007405	NM_007405	11512	chr15	98589986	98607633	-	6001	1	Adcy6
NM_009627	NM_009627	11535	chr7	110627669	110629819	+	1375	1	Adm
NM_172393	NM_172393	11630	chr10	43950307	44004846	-	7394	1	Aim1
NM_007451	NM_007451	11740	chrX	36795597	36798808	+	1289	1	Slc25a5
NM_001173477	NM_001173477	11790	chr1	75400085	75404565	+	1401	1	Speg
NM_007468	NM_007468	11808	chr9	46240844	46243458	+	1661	1	Apoa4
NM_001277944	NM_001277944	11813	chr7	19671579	19677941	-	720	1	Apoc2
NM_013475	NM_013475	11818	chr11	108395297	108414396	+	1176	1	Apoh
NM_007486	NM_007486	11857	chr6	136923661	136941756	-	1179	1	Arhgdib
NM_009708	NM_009708	11858	chr11	101468338	101471306	+	678	1	Rnd2
NM_009710	NM_009710	11870	chr7	102101743	102111148	+	1410	1	Art1
NM_009713	NM_009713	11883	chr15	89472476	89477424	-	3480	1	Arsa
NM_013415	NM_013415	11932	chr11	69599750	69605960	-	2950	1	Atp1b2
NR_028499	NR_028499	11936	chr9	45399709	45410278	+	758	1	Fxyd2
NM_007507	NM_007507	11958	chr5	108433253	108434378	-	286	1	Atp5k
NM_001109757	NM_001109757	11977	chrX	106027224	106128160	+	8173	1	Atp7a
NM_007512	NM_007512	11983	chr4	132530555	132535414	-	1485	1	Atpif1
NM_007538	NM_007538	12057	chr6	29376671	29380513	-	2403	1	Opn1sw
NM_009747	NM_009747	12062	chr12	105563172	105593071	+	1675	1	Bdkrb2
NM_016668	NM_016668	12116	chr13	93616891	93637758	-	2061	1	Bhmt
NR_033241	NR_033241	12153	chr14	70474555	70520260	-	4434	1	Bmp1
NM_007556	NM_007556	12161	chr13	38345716	38500314	+	2987	1	Bmp6
NM_007558	NM_007558	12163	chr4	123312650	123343252	-	2352	1	Bmp8a
NM_001113179	NM_001113179	12235	chr2	127800200	127831859	-	4310	1	Bub1
NM_009776	NM_009776	12258	chr2	84765360	84775429	-	1810	1	Serping1
NM_007577	NM_007577	12273	chr7	16246743	16259540	-	2476	1	C5ar1
NM_007582	NM_007582	12299	chr11	107703218	107716476	-	1197	1	Cacng1
NM_007595	NM_007595	12323	chr11	5969666	6065748	-	3978	1	Camk2b
NM_007597	NM_007597	12330	chr11	50293957	50325673	-	4272	1	Canx
NM_009794	NM_009794	12334	chr1	182467259	182517483	-	3162	1	Capn2
NM_001301250	NM_001301250	12337	chr7	98121559	98162342	-	4319	1	Capn5
NM_009797	NM_009797	12340	chr3	104822785	104864505	-	3175	1	Capza1
NM_007607	NM_007607	12351	chr11	84957754	84966054	+	1290	1	Car4
NM_007608	NM_007608	12352	chr8	121916138	121944912	-	1236	1	Car5a
NM_007611	NM_007611	12369	chr19	56397129	56442343	+	2340	1	Casp7
NM_007630	NM_007630	12442	chr9	70407689	70421554	-	1530	1	Ccnb2
NM_001282943	NM_001282943	12448	chr4	11191709	11204779	+	3012	1	Ccne2
NM_017367	NM_017367	12453	chr5	93181933	93206495	-	2795	1	Ccni
NM_007637	NM_007637	12465	chr15	31590884	31601804	-	1756	1	Cct5
NM_013488	NM_013488	12504	chr6	124864693	124888209	-	3083	1	Cd4
NM_001252628	NM_001252628	12556	chr8	104601915	104624396	-	2954	1	Cdh16
NM_009868	NM_009868	12562	chr8	104101625	104144502	+	3972	1	Cdh5
NM_009875	NM_009875	12576	chr6	134920401	134925525	+	2400	1	Cdkn1b
NM_019394	NM_019394	12587	chr7	27179741	27181149	-	561	1	Mia
NM_009879	NM_009879	12589	chr5	122550204	122614518	-	2929	1	Ift81
NM_001024806	NM_001024806	12607	chr17	78919003	78937070	-	4059	1	Cebpz
NM_009890	NM_009890	12642	chr19	34473784	34475135	-	1349	1	Ch25h
NM_001112697	NM_001112697	12669	chr19	8664005	8683602	+	6281	1	Chrm1
NM_007702	NM_007702	12683	chr18	67343564	67367794	+	1157	1	Cidea
NM_007703	NM_007703	12686	chr19	46131899	46135694	+	1873	1	Elovl3
NM_007705	NM_007705	12696	chr10	80167841	80171653	+	1247	1	Cirbp
NM_013491	NM_013491	12723	chr6	42286685	42314656	+	3520	1	Clcn1
NM_001146307	NM_001146307	12733	chr4	141384611	141398099	-	2384	1	Clcnka
NM_009903	NM_009903	12740	chr5	134945124	134946934	-	1808	1	Cldn4
NM_009906	NM_009906	12751	chr7	105744847	105752207	-	3479	1	Tpp1
NM_007720	NM_007720	12776	chr9	120092133	120094906	+	1152	1	Ccr8
NM_007723	NM_007723	12788	chr5	72603697	72642752	-	2727	1	Cnga1
NM_009920	NM_009920	12794	chr19	5092868	5098521	-	1335	1	Cnih2
NM_170786	NM_170786	12803	chr19	12763528	12765632	-	1201	1	Cntf
NM_016706	NM_016706	12812	chr11	88973935	88991613	+	2598	1	Coil
NM_001113515	NM_001113515	12824	chr15	97975602	98004724	-	4874	1	Col2a1
NM_007737	NM_007737	12832	chr1	45374331	45503282	-	6559	1	Col5a2
NM_009943	NM_009943	12862	chr7	128205435	128206366	-	654	1	Cox6a2
NM_001136058	NM_001136058	12933	chr5	37242058	37292163	+	3087	1	Crmp1
NM_009955	NM_009955	12934	chr14	66802864	66868600	-	4416	1	Dpysl2
NM_007776	NM_007776	12967	chr1	65061838	65063440	-	630	1	Crygd
NM_009971	NM_009971	12985	chr11	98701313	98703629	+	1356	1	Csf3
NM_009974	NM_009974	13000	chr8	95446096	95488820	-	3752	1	Csnk2a2
NM_007789	NM_007789	13004	chr8	70093085	70120844	-	7149	1	Ncan
NM_007803	NM_007803	13043	chr7	144435724	144470935	-	3204	1	Cttn
NM_001136059	NM_001136059	13076	chr9	57697613	57703824	+	2612	1	Cyp1a1
NM_001286397	NM_001286397	13142	chr5	114003884	114025675	+	1739	1	Dao
NM_010023	NM_010023	13177	chr17	24426683	24439316	+	1082	1	Eci1
NM_007837	NM_007837	13198	chr10	127290793	127296288	+	865	1	Ddit3
NM_007866	NM_007866	13389	chr7	28293555	28301785	-	2152	1	Dll3
NM_010059	NM_010059	13404	chr15	79561498	79605109	-	2203	1	Dmc1
NM_007873	NM_007873	13447	chr11	75768271	75796060	-	5056	1	Doc2b
NM_010073	NM_010073	13481	chr2	32570858	32573571	+	855	1	Dpm2
NM_021353	NM_021353	13487	chr12	31438219	31473919	+	2887	1	Slc26a3
NM_007878	NM_007878	13491	chr7	141292006	141295001	+	1330	1	Drd4
NM_021354	NM_021354	13495	chr11	60454617	60468705	+	1698	1	Drg2
NM_010104	NM_010104	13614	chr13	42301270	42307989	+	2337	1	Edn1
NM_007909	NM_007909	13637	chr10	80179482	80190010	+	2125	1	Efna2
NM_010117	NM_010117	13650	chr11	32209585	32222293	-	2919	1	Rhbdf1
NM_013508	NM_013508	13713	chr10	93247416	93311159	-	4227	1	Elk3
NM_013510	NM_013510	13821	chr2	156420909	156543214	+	6417	1	Epb41l1
NM_007951	NM_007951	13877	chr12	80634023	80643861	-	806	1	Erh
NM_007960	NM_007960	14009	chr12	38780258	38868215	+	4116	1	Etv1
NM_007964	NM_007964	14020	chr5	107744795	107875107	-	5829	1	Evi5
NM_010173	NM_010173	14073	chr4	115996656	116017902	-	3799	1	Faah
NM_010180	NM_010180	14114	chr15	85206008	85286294	+	3340	1	Fbln1
NM_010189	NM_010189	14132	chr7	45092993	45103822	-	1729	1	Fcgrt
NM_010190	NM_010190	14134	chr2	28076479	28084878	-	1051	1	Fcnb
NM_007997	NM_007997	14149	chr11	115268025	115276969	-	1852	1	Fdxr
NM_008001	NM_008001	14163	chrX	151047170	151089686	+	4146	1	Fgd1
NM_008004	NM_008004	14171	chr14	70636205	70642268	-	1680	1	Fgf17
NM_010211	NM_010211	14199	chrX	56731761	56793346	+	2373	1	Fhl1
NM_010213	NM_010213	14201	chr4	124700699	124708611	+	1677	1	Fhl3
NM_010226	NM_010226	14239	chr2	152931898	152933208	-	1308	1	Foxs1
NM_019681	NM_019681	14299	chr2	31245923	31295471	+	4025	1	Ncs1
NM_010241	NM_010241	14339	chr8	91123499	91135494	-	2150	1	Aktip
NM_022721	NM_022721	14367	chr1	64730558	64737750	-	6910	1	Fzd5
NM_008060	NM_008060	14376	chr19	8898057	8916742	+	3947	1	Ganab
NM_008062	NM_008062	14381	chrX	74409486	74429161	-	2601	1	G6pdx
NM_008065	NM_008065	14390	chr16	84835124	84863778	+	4974	1	Gabpa
NM_001159297	NM_001159297	14525	chr16	45610440	45622867	+	3356	1	Gcsam
NM_010277	NM_010277	14580	chr11	102887336	102897200	-	2706	1	Gfap
NM_010285	NM_010285	14601	chr2	157329496	157346655	-	510	1	Ghrh
NM_008119	NM_008119	14607	chr11	96024545	96030828	+	641	1	Gip
NM_010287	NM_010287	14608	chr9	14860210	14870789	+	3580	1	Gpr83
NM_008121	NM_008121	14613	chr3	97032402	97053634	+	3119	1	Gja5
NM_008122	NM_008122	14615	chr11	102799478	102805019	-	2528	1	Gjc1
NM_001081125	NM_001081125	14633	chr1	118834061	119053619	-	6692	1	Gli2
NM_008140	NM_008140	14685	chr9	107674474	107679592	-	2197	1	Gnat1
NM_001285911	NM_001285911	14702	chr14	19872559	19976693	-	3647	1	Gng2
NM_001136064	NM_001136064	14705	chr19	8837467	8848683	+	1948	1	Bscl2
NM_010321	NM_010321	14711	chr17	46725664	46729165	-	1024	1	Gnmt
NM_008148	NM_008148	14729	chr16	30307685	30310781	-	2195	1	Gp5
NM_016696	NM_016696	14733	chr1	92831686	92860196	+	3541	1	Gpc1
NR_072990	NR_072990	14760	chr6	134869092	134897925	-	2071	1	Gpr19
NM_009962	NM_009962	14764	chr19	10937160	10942511	+	2639	1	Ptgdr2
NM_001190985	NM_001190985	14768	chr1	67000517	67038872	-	4450	1	Lancl1
NM_010343	NM_010343	14780	chr13	21286429	21292686	-	1622	1	Gpx5
NM_013534	NM_013534	14789	chr6	124841095	124857687	-	2763	1	P3h3
NM_001039195	NM_001039195	14800	chr3	80691492	80802791	-	3476	1	Gria2
NM_008168	NM_008168	14809	chr7	25009851	25072369	-	3816	1	Grik5
NM_001163434	NM_001163434	14828	chr2	34772090	34776529	+	2523	1	Hspa5
NM_133256	NM_133256	14843	chr5	75075601	75077893	+	1661	1	Gsx2
NM_010357	NM_010357	14860	chr9	78191966	78209349	+	949	1	Gsta4
NM_010358	NM_010358	14862	chr3	108012250	108017973	-	1284	1	Gstm1
NM_133975	NM_133975	14897	chr1	84721189	84839304	-	9589	1	Trip12
NM_013818	NM_013818	14904	chr15	79690896	79721479	+	3384	1	Gtpbp1
NM_145067	NM_145067	14917	chr6	136697284	136781742	-	3836	1	Gucy2c
NM_010386	NM_010386	14998	chr17	34122832	34139101	+	1650	1	H2-DMa
NM_010395	NM_010395	15024	chr17	36115876	36121435	-	2846	1	H2-T10
NM_010397	NM_010397	15039	chr17	36038409	36042702	-	1747	1	H2-T22
NM_008221	NM_008221	15135	chr7	103851754	103853207	-	614	1	Hbb-y
NM_008223	NM_008223	15160	chr16	17331371	17343572	+	2181	1	Serpind1
NM_008230	NM_008230	15186	chr2	126593660	126618678	-	2385	1	Hdc
NM_008256	NM_008256	15360	chr3	98280431	98310738	+	3282	1	Hmgcs2
NM_010442	NM_010442	15368	chr8	75093618	75100593	+	1569	1	Hmox1
NM_008258	NM_008258	15374	chr11	115497353	115514370	-	1351	1	Hn1
NM_008262	NM_008262	15379	chr9	74861921	74889647	+	1819	1	Onecut1
NM_008277	NM_008277	15445	chr5	123171807	123182686	-	1347	1	Hpd
NM_001110252	NM_001110252	15451	chr7	31098725	31115326	-	1850	1	Hpn
NM_017371	NM_017371	15458	chr7	105591611	105600116	-	1468	1	Hpx
NR_045521	NR_045521	15469	chr7	44976755	44986420	-	1496	1	Prmt1
NM_008300	NM_008300	15525	chr11	53259814	53300479	-	4619	1	Hspa4
NM_008319	NM_008319	15898	chr9	21032038	21039036	+	2969	1	Icam5
NM_008323	NM_008323	15929	chrX	73778963	73786897	-	1316	1	Idh3g
NM_008331	NM_008331	15957	chr19	34640889	34650009	+	2634	1	Ifit1
NM_010502	NM_010502	15962	chr4	88850087	88850656	+	568	1	Ifna1
NM_010504	NM_010504	15967	chr4	88841816	88842459	+	641	1	Ifna4
NM_206871	NM_206871	15969	chr4	88827416	88827985	+	568	1	Ifna6
NM_008337	NM_008337	15978	chr10	118441046	118445894	+	1204	1	Ifng
NM_010515	NM_010515	16004	chr17	12682406	12769706	-	8879	1	Igf2r
NM_010531	NM_010531	16068	chr7	102015077	102018155	-	1393	1	Il18bp
NM_001290423	NM_001290423	16156	chr7	4772378	4782857	-	1838	1	Il11
NM_008365	NM_008365	16182	chr1	40466006	40500854	+	4145	1	Il18r1
NM_013563	NM_013563	16186	chrX	101264385	101268255	-	1653	1	Il2rg
NM_010556	NM_010556	16187	chr11	54265085	54267279	-	842	1	Il3
NM_010558	NM_010558	16191	chr11	53720794	53725103	+	1528	1	Il5
NM_008375	NM_008375	16204	chr11	43596040	43601562	-	504	1	Fabp6
NM_008382	NM_008382	16326	chr10	127349402	127351772	-	2131	1	Inhbe
NM_008392	NM_008392	16365	chr14	103047012	103056573	+	2581	1	Irg1
NM_010575	NM_010575	16399	chr11	102453297	102469883	-	3405	1	Itga2b
NM_008406	NM_008406	16424	chr14	30929180	30943289	-	3053	1	Itih1
NM_172647	NM_172647	16456	chr1	171437561	171464593	+	2470	1	F11r
NM_013568	NM_013568	16494	chr6	126708329	126740674	-	5835	1	Kcna6
NM_010601	NM_010601	16512	chr15	99224976	99242817	+	3566	1	Kcnh3
NM_010605	NM_010605	16521	chr9	32314783	32344237	-	4490	1	Kcnj5
NM_008429	NM_008429	16524	chr1	172321033	172329263	-	3264	1	Kcnj9
NM_001159850	NM_001159850	16526	chr1	189207930	189343353	-	3397	1	Kcnk2
NM_008433	NM_008433	16534	chr7	24370263	24385212	+	1941	1	Kcnn4
NM_008437	NM_008437	16541	chr7	44572445	44586846	+	1468	1	Napsa
NM_010616	NM_010616	16552	chr4	63165637	63172131	-	2229	1	Kif12
NM_008446	NM_008446	16571	chrX	100626065	100727271	+	4680	1	Kif4
NM_001291222	NM_001291222	16576	chr7	79698098	79714186	-	4505	1	Kif7
NM_010637	NM_010637	16600	chr4	55527137	55532475	-	3037	1	Klf4
NM_010654	NM_010654	16643	chr6	129591811	129598775	+	858	1	Klrd1
NM_031170	NM_031170	16691	chr15	101996711	102004342	-	1794	1	Krt8
NM_010680	NM_010680	16774	chr18	12334024	12583012	+	10265	1	Lama3
NM_001081171	NM_001081171	16776	chr2	180176373	180225859	-	11307	1	Lama5
NM_008485	NM_008485	16782	chr1	153122756	153186447	-	5138	1	Lamc2
NM_008487	NM_008487	16800	chr3	88621106	88648052	+	4276	1	Arhgef2
NM_010691	NM_010691	16814	chr19	45233728	45235236	-	860	1	Lbx1
NM_010692	NM_010692	16815	chr6	83086365	83088241	+	813	1	Lbx2
NM_008499	NM_008499	16873	chr5	120431886	120441457	+	2729	1	Lhx5
NM_001042577	NM_001042577	16876	chr1	138830944	138842444	-	2073	1	Lhx9
NM_010724	NM_010724	16913	chr17	34198195	34201454	+	1215	1	Psmb8
NM_008509	NM_008509	16956	chr8	68880555	68906932	+	4037	1	Lpl
NM_008520	NM_008520	16998	chr19	5740904	5758532	+	5160	1	Ltbp3
NM_008521	NM_008521	17001	chr11	50236461	50238532	-	653	1	Ltc4s
NM_016753	NM_016753	17035	chr3	67457999	67463907	-	1084	1	Lxn
NM_001159902	NM_001159902	17057	chr6	128609227	128622934	-	1168	1	Klrb1a
NM_001025602	NM_001025602	17082	chr1	40439629	40465414	+	5286	1	Il1rl1
NM_017372	NM_017372	17105	chr10	117277541	117282272	-	1051	1	Lyz2
NM_010751	NM_010751	17119	chr6	86647045	86669159	-	4653	1	Mxd1
NM_173740	NM_173740	17161	chrX	16619698	16687812	+	4144	1	Maoa
NM_008553	NM_008553	17172	chr10	87491041	87493660	-	2255	1	Ascl1
NM_008557	NM_008557	17178	chr7	31070535	31076697	-	514	1	Fxyd3
NM_010770	NM_010770	17182	chr12	8947929	8972028	+	3004	1	Matn3
NM_013593	NM_013593	17189	chr15	77015487	77050668	-	1050	1	Mb
NM_010773	NM_010773	17191	chr18	70568292	70626131	+	1841	1	Mbd2
NM_001252437	NM_001252437	17237	chr16	4886100	4938296	+	3274	1	Mgrn1
NM_021557	NM_021557	17252	chr12	79175551	79191819	-	1565	1	Rdh11
NM_010792	NM_010792	17299	chr10	127041932	127045461	+	879	1	Mettl1
NM_008592	NM_008592	17300	chr13	31806646	31810635	+	3987	1	Foxc1
NM_010807	NM_010807	17357	chr4	129513581	129515981	+	1597	1	Marcksl1
NM_008606	NM_008606	17385	chr10	75923222	75932502	-	2278	1	Mmp11
NM_008609	NM_008609	17388	chr8	95352337	95374293	+	4267	1	Mmp15
NM_008619	NM_008619	17454	chr3	104794834	104818305	-	3541	1	Mov10
NM_001039368	NM_001039368	17749	chr15	36174010	36177012	+	620	1	Polr2k
NM_001173506	NM_001173506	17754	chr2	121295454	121310832	+	11531	1	Map1a
NM_008634	NM_008634	17755	chr13	99421464	99516602	-	11843	1	Map1b
NM_008632	NM_008632	17756	chr1	66175329	66442583	+	5411	1	Map2
NM_010839	NM_010839	17763	chrX	75404846	75416584	-	1006	1	Mtcp1
NM_008641	NM_008641	17776	chr4	116306760	116464181	-	5675	1	Mast2
NM_008644	NM_008644	17830	chr5	88317312	88328817	+	1161	1	Prol1
NM_010844	NM_010844	17833	chr7	141789011	141819135	+	8453	1	Muc5ac
NM_013607	NM_013607	17880	chr16	14194527	14291408	-	6588	1	Myh11
NM_001099635	NM_001099635	17883	chr11	67078300	67102291	+	5949	1	Myh3
NM_001164171	NM_001164171	17888	chr14	54941921	54966607	-	6038	1	Myh6
NM_010860	NM_010860	17904	chr10	128490861	128493825	-	606	1	Myl6
NM_008668	NM_008668	17937	chr10	127660918	127666703	-	2566	1	Nab2
NM_001168577	NM_001168577	17961	chr8	67494875	67502578	+	1369	1	Nat2
NM_008675	NM_008675	17965	chr4	139082292	139092970	-	1756	1	Nbl1
NM_010880	NM_010880	17975	chr1	86344719	86359455	-	8241	1	Ncl
NM_010881	NM_010881	17977	chr12	4247362	4477182	-	7304	1	Ncoa1
NM_010895	NM_010895	18013	chr11	98325417	98329645	-	3133	1	Neurod2
NM_010900	NM_010900	18020	chr7	126382854	126396737	-	3378	1	Nfatc2ip
NM_008699	NM_008699	18089	chr19	43612325	43615892	+	2108	1	Nkx2-3
NM_144955	NM_144955	18096	chr5	101659197	101664711	-	1790	1	Nkx6-1
NM_008713	NM_008713	18127	chr5	24364819	24384474	+	4095	1	Nos3
NM_010929	NM_010929	18132	chr17	34564295	34588543	+	6572	1	Notch4
NM_008718	NM_008718	18142	chr7	16455721	16476780	-	2077	1	Npas1
NM_008719	NM_008719	18143	chr1	39194272	39363240	+	4157	1	Npas2
NM_001271917	NM_001271917	18185	chr14	55518978	55524981	-	2372	1	Nrl
NM_018766	NM_018766	18216	chr2	180499976	180544979	+	3910	1	Ntsr1
NM_008754	NM_008754	18249	chrX	78085505	78091374	-	748	1	Obp1a
NM_010991	NM_010991	18348	chr14	54281896	54282925	-	1027	1	Olfr49
NM_011016	NM_011016	18406	chr4	63362449	63365877	+	766	1	Orm2
NM_013623	NM_013623	18407	chr4	63356162	63359511	+	765	1	Orm3
NM_011019	NM_011019	18414	chr15	6813577	6874313	-	4815	1	Osmr
NM_008770	NM_008770	18417	chr3	31149920	31164326	+	1867	1	Cldn11
NM_008773	NM_008773	18442	chr7	100996568	101011998	-	3006	1	P2ry2
NM_008784	NM_008784	18518	chrX	100494291	100516125	+	1510	1	Igbp1
NM_023662	NM_023662	18536	chr8	41239759	41334087	+	8341	1	Pcm1
NM_011045	NM_011045	18538	chr2	132249286	132253180	-	1252	1	Pcna
NM_011068	NM_011068	18631	chr7	79737264	79743025	-	874	1	Pex11a
NM_008823	NM_008823	18636	chrX	20925454	20931555	-	1625	1	Cfp
NM_031190	NM_031190	18663	chr17	40207018	40208609	-	1589	1	Pgk2
NM_011081	NM_011081	18700	chrX	164419787	164433915	+	3585	1	Piga
NM_008839	NM_008839	18706	chr3	32436151	32468486	+	8895	1	Pik3ca
NM_008841	NM_008841	18709	chr8	70768181	70776712	-	3141	1	Pik3r2
NM_011102	NM_011102	18752	chr7	3303532	3331097	+	3095	1	Prkcg
NM_008856	NM_008856	18755	chr12	73584796	73778184	+	3529	1	Prkch
NM_008862	NM_008862	18767	chr3	7366604	7445365	+	3677	1	Pkia
NM_008863	NM_008863	18768	chr10	57631981	57741112	+	5487	1	Pkib
NM_011107	NM_011107	18778	chr5	115466266	115474717	+	546	1	Pla2g1b
NM_001290349	NM_001290349	18797	chr19	6953713	6969814	-	4224	1	Plcb3
NM_178087	NM_178087	18854	chr9	58217180	58249786	-	5366	1	Pml
NM_001271542	NM_001271542	18983	chr8	40492538	40515847	-	2537	1	Cnot7
NM_011141	NM_011141	18991	chr4	124657646	124660655	+	3007	1	Pou3f1
NM_011155	NM_011155	19060	chr7	17004641	17027914	-	2054	1	Ppp5c
NM_008918	NM_008918	19064	chr11	102099931	102101300	-	475	1	Ppy
NM_008924	NM_008924	19087	chr9	108692143	108749511	+	4027	1	Prkar2a
NM_013639	NM_013639	19132	chr15	99055174	99058978	+	1855	1	Prph
NM_008938	NM_008938	19133	chr17	46910485	46924926	+	2627	1	Prph2
NM_021463	NM_021463	19139	chrX	140456603	140476140	+	1966	1	Prps1
NM_008942	NM_008942	19155	chr11	97205856	97280576	-	4116	1	Npepps
NM_008944	NM_008944	19166	chr13	14613242	14625673	+	936	1	Psma2
NM_008946	NM_008946	19175	chr11	70525357	70527858	+	1028	1	Psmb6
NM_011187	NM_011187	19177	chr2	38588046	38643906	-	959	1	Psmb7
NM_008949	NM_008949	19183	chr11	101092141	101095435	-	962	1	Psmc3ip
NM_001077363	NM_001077363	19205	chr10	79854432	79864435	+	3092	1	Ptbp1
NM_013641	NM_013641	19216	chr8	83666640	83670103	+	2077	1	Ptger1
NM_008971	NM_008971	19230	chr15	94577948	94589824	-	2962	1	Twf1
NM_016933	NM_016933	19265	chr19	4154646	4156710	+	842	1	Ptprcap
NM_008985	NM_008985	19275	chr1	75247041	75264208	-	3510	1	Ptprn
NM_008986	NM_008986	19285	chr11	100956736	100970617	-	3214	1	Ptrf
NM_008990	NM_008990	19294	chr7	19716644	19749573	-	2724	1	Pvrl2
NM_024436	NM_024436	19334	chr2	173659845	173702182	+	1900	1	Rab22a
NM_021494	NM_021494	19347	chr7	109893781	109960422	-	4930	1	Dennd5a
NM_011232	NM_011232	19355	chr15	10486018	10493695	+	1512	1	Rad1
NM_001283011	NM_001283011	19356	chr13	100617164	100651061	-	2906	1	Rad17
NM_011247	NM_011247	19647	chr7	122970564	123002572	+	6179	1	Rbbp6
NM_001164767	NM_001164767	19649	chr9	37416045	37433175	-	4696	1	Robo3
NM_001166623	NM_001166623	19655	chrX	57386030	57393036	-	2429	1	Rbmx
NM_031192	NM_031192	19701	chr1	133350674	133360319	+	1411	1	Ren1
NM_031193	NM_031193	19702	chr1	133350566	133360323	+	1514	1	Ren2
NM_009053	NM_009053	19719	chr11	120780745	120784204	-	2108	1	Rfng
NM_001173483	NM_001173483	19771	chr7	79374870	79387027	-	2110	1	Rlbp1
NR_001460	NR_001460	19782	chr4	43492785	43493059	-	274	1	Rmrp
NR_004439	NR_004439	19784	chr3	22251370	22251607	+	237	1	Rprl2
NM_011276	NM_011276	19820	chrX	103957167	103981284	-	7428	1	Rlim
NM_011287	NM_011287	19896	chr17	28328471	28331033	+	822	1	Rpl10a
NM_011292	NM_011292	20005	chr5	65388364	65391431	-	715	1	Rpl9
NM_009086	NM_009086	20017	chr2	129100996	129126595	+	3981	1	Polr1b
NM_181730	NM_181730	20018	chr5	147077346	147111361	+	1132	1	Polr1d
NM_013647	NM_013647	20055	chr7	28350689	28352698	+	608	1	Rps16
NM_009094	NM_009094	20102	chrX	102184941	102189391	-	963	1	Rps4x
NM_009098	NM_009098	20116	chr4	117153836	117156132	-	732	1	Rps8
NM_011302	NM_011302	20147	chrX	160768013	160799663	+	5832	1	Rs1
NM_009109	NM_009109	20190	chr7	29003340	29125151	-	15254	1	Ryr1
NM_009117	NM_009117	20208	chr7	46740499	46742980	-	601	1	Saa1
NM_011314	NM_011314	20209	chr7	46751833	46754314	+	604	1	Saa2
NM_009133	NM_009133	20262	chr2	181306459	181314500	-	1129	1	Stmn3
NM_001253860	NM_001253860	20271	chr9	119483408	119562678	-	8258	1	Scn5a
NM_011331	NM_011331	20293	chr11	82101845	82103399	+	531	1	Ccl12
NM_009142	NM_009142	20312	chr8	94772180	94782426	+	3138	1	Cx3cl1
NM_011342	NM_011342	20333	chr3	97901227	97922318	+	1808	1	Sec22b
NM_011348	NM_011348	20349	chr5	14025276	14256689	+	6842	1	Sema3e
NM_009155	NM_009155	20363	chr15	3270977	3280508	+	2023	1	Sepp1
NM_001291225	NM_001291225	20370	chr11	77930839	77979052	+	4131	1	Sez6
NM_009161	NM_009161	20391	chr11	94962777	94976327	-	1725	1	Sgca
NM_011361	NM_011361	20393	chr10	21994666	21999902	+	2441	1	Sgk1
NM_021882	NM_021882	20431	chr10	128706258	128720238	+	2117	1	Pmel
NM_009180	NM_009180	20446	chr11	116676705	116694660	-	2022	1	St6galnac2
NM_009189	NM_009189	20471	chr12	73041827	73046712	-	2845	1	Six1
NM_011383	NM_011383	20475	chr7	19094544	19098345	+	2848	1	Six5
NM_011384	NM_011384	20476	chr12	72939882	72944899	+	4015	1	Six6
NM_009199	NM_009199	20510	chr19	28835166	28913960	+	3694	1	Slc1a1
NM_001077515	NM_001077515	20511	chr2	102706438	102790784	+	10985	1	Slc1a2
NM_009213	NM_009213	20598	chr10	41487172	41490340	-	1590	1	Smpd2
NM_011426	NM_011426	20612	chr2	131069220	131086765	-	6364	1	Siglec1
NM_009228	NM_009228	20648	chr2	154376314	154408084	-	2105	1	Snta1
NM_178880	NM_178880	20658	chr16	91647824	91679192	+	8437	1	Son
NM_011436	NM_011436	20660	chr9	41968489	42124289	-	6888	1	Sorl1
NM_009233	NM_009233	20664	chr8	12395519	12399555	+	4034	1	Sox1
NM_011446	NM_011446	20680	chr14	63943706	63950732	+	3262	1	Sox7
NM_009255	NM_009255	20720	chr1	79794321	79858665	-	2044	1	Serpine2
NM_011480	NM_011480	20787	chr11	60199084	60220627	-	4306	1	Srebf1
NM_009277	NM_009277	20821	chr7	102557920	102565482	-	2780	1	Trim21
NM_009292	NM_009292	20899	chr6	34920960	34939342	+	1444	1	Stra8
NM_011503	NM_011503	20911	chr8	3631160	3643644	+	2682	1	Stxbp2
NM_009303	NM_009303	20972	chr15	80091334	80113440	+	812	1	Syngr1
NM_011522	NM_011522	20974	chr17	24685092	24689949	-	1953	1	Syngr3
NM_020614	NM_020614	21340	chr12	24498581	24558571	+	2002	1	Taf1b
NM_177129	NM_177129	21367	chr1	132509425	132542940	-	9510	1	Cntn2
NM_013684	NM_013684	21374	chr17	15499888	15517427	+	1832	1	Tbp
NM_009333	NM_009333	21416	chr19	55741810	55933655	+	4039	1	Tcf7l2
NM_011546	NM_011546	21417	chr18	5591860	5775468	+	5796	1	Zeb1
NM_011565	NM_011565	21677	chr7	45215753	45233619	+	2101	1	Tead2
NM_011575	NM_011575	21786	chr17	31125306	31129611	-	453	1	Tff3
NM_009377	NM_009377	21823	chr7	142892776	142899966	-	1742	1	Th
NM_001173505	NM_001173505	21832	chr16	20724454	20730598	-	2254	1	Thpo
NM_011590	NM_011590	21854	chr1	135301535	135313737	-	909	1	Timm17a
NM_011592	NM_011592	21856	chr8	4259731	4275905	-	1767	1	Timm44
NM_011594	NM_011594	21858	chr11	118301061	118355411	-	3615	1	Timp2
NM_001252401	NM_001252401	21886	chr10	81575287	81590473	+	2699	1	Tle2
NM_030682	NM_030682	21897	chr5	64924680	64932699	-	2716	1	Tlr1
NM_011604	NM_011604	21899	chr5	64953095	64960034	-	2596	1	Tlr6
NM_009402	NM_009402	21946	chr7	18884690	18890438	+	676	1	Pglyrp1
NM_011617	NM_011617	21948	chr17	57145997	57149777	-	837	1	Cd70
NM_009404	NM_009404	21950	chr17	57105385	57107757	+	1225	1	Tnfsf9
NM_011618	NM_011618	21955	chr7	4504570	4515975	-	1011	1	Tnnt1
NM_001130174	NM_001130174	21956	chr1	135836334	135852268	+	1199	1	Tnnt2
NM_001163664	NM_001163664	21957	chr7	142498836	142516009	+	1060	1	Tnnt3
NM_001136084	NM_001136084	21990	chr7	46644641	46667377	-	4238	1	Tph1
NM_009415	NM_009415	21991	chr6	124810592	124814296	-	1592	1	Tpi1
NM_011637	NM_011637	22040	chr9	109057932	109059723	-	1070	1	Trex1
NM_133977	NM_133977	22041	chr9	103208876	103230286	-	2313	1	Trf
NM_011639	NM_011639	22051	chr5	137309899	137314241	-	1749	1	Trip6
NM_009432	NM_009432	22094	chr3	102777398	102782714	-	638	1	Tshb
NM_011648	NM_011648	22095	chr12	91400993	91540509	+	4300	1	Tshr
NM_013697	NM_013697	22139	chr18	20665250	20674326	+	1215	1	Ttr
NM_020557	NM_020557	22169	chr12	26469215	26479837	+	3182	1	Cmpk2
NM_011663	NM_011663	22183	chr11	22972005	22976496	+	4489	1	Zrsr1
NM_009461	NM_009461	22222	chr2	120860276	120970715	-	7712	1	Ubr1
NM_011675	NM_011675	22245	chr2	32255002	32260105	-	1942	1	Uck1
NM_009478	NM_009478	22275	chr4	116989965	116994413	-	1477	1	Urod
NM_009483	NM_009483	22289	chrX	18162575	18279936	+	5904	1	Kdm6a
NM_009484	NM_009484	22290	chrY	1097144	1245738	-	5199	1	Uty
NM_009486	NM_009486	22301	chr14	51451962	51461293	+	2711	1	Vmn2r89
NM_009509	NM_009509	22349	chr1	74409384	74435560	+	3095	1	Vil1
NM_001164567	NM_001164567	22351	chr9	119052778	119071525	+	2893	1	Vill
NM_009511	NM_009511	22355	chr12	116077726	116146261	+	3370	1	Vipr2
NM_033561	NM_033561	22384	chr5	134619872	134639409	-	2485	1	Eif4h
NM_016873	NM_016873	22403	chr2	163820834	163833147	+	1768	1	Wisp2
NM_009520	NM_009520	22414	chr3	104944805	104961709	-	3566	1	Wnt2b
NM_001171147	NM_001171147	22601	chr9	7932001	8004596	-	4158	1	Yap1
NM_009542	NM_009542	22643	chr17	33380179	33394637	-	2725	1	Zfp101
NM_011749	NM_011749	22661	chr16	33380775	33503903	+	9420	1	Zfp148
NM_009548	NM_009548	22671	chr11	61448417	61453992	-	3081	1	Rnf112
NM_011756	NM_011756	22695	chr7	28376784	28379228	-	1761	1	Zfp36
NM_011762	NM_011762	22717	chr7	27838584	27856774	+	3789	1	Zfp59
NM_016683	NM_016683	22757	chr5	145204559	145221750	+	3789	1	Zkscan5
NM_009580	NM_009580	22786	chr19	10914296	10920601	-	1911	1	Zp1
NM_011776	NM_011776	22788	chr5	135980105	135988624	+	1307	1	Zp3
NM_011792	NM_011792	23821	chr9	45838529	45862484	+	4183	1	Bace1
NM_011798	NM_011798	23832	chr9	123852315	123862029	-	4449	1	Xcr1
NM_001038604	NM_001038604	23845	chr6	40574898	40585805	-	3811	1	Clec5a
NM_201227	NM_201227	23863	chr8	84815405	84822823	-	1580	1	Dand5
NM_011876	NM_011876	23999	chr9	106203108	106215387	+	1583	1	Twf2
NM_011879	NM_011879	24010	chr18	36744656	36757639	+	1974	1	Ik
NM_011885	NM_011885	24030	chr7	28739641	28741781	-	679	1	Mrps12
NR_027800	NR_027800	24082	chr11	60920941	60931867	-	1265	1	Map2k3os
NM_011904	NM_011904	24087	chr19	41083981	41206774	-	3346	1	Tll2
NM_011916	NM_011916	24127	chr9	95954760	96057806	+	10234	1	Xrn1
NM_011924	NM_011924	26361	chr1	131599114	131612000	+	4144	1	Avpr1b
NM_019405	NM_019405	26370	chrX	72913565	72918344	-	1179	1	Cetn2
NM_001112711	NM_001112711	26385	chr13	55445331	55460927	+	2981	1	Grk6
NM_001163643	NM_001163643	26404	chr15	102497647	102517004	-	5510	1	Map3k12
NM_011950	NM_011950	26415	chr17	28769317	28778704	+	1374	1	Mapk13
NM_023043	NM_023043	26434	chr2	131950861	131956131	+	3174	1	Prnd
NM_013712	NM_013712	26549	chrX	101449109	101453541	+	1280	1	Itgb1bp2
NM_015755	NM_015755	26559	chr16	90386397	90499553	+	4996	1	Hunk
NM_013846	NM_013846	26564	chr13	53109317	53286109	-	3959	1	Ror2
NM_011988	NM_011988	26568	chr3	90385233	90389938	-	2264	1	Slc27a3
NM_011991	NM_011991	26572	chr11	59817804	59839767	-	1552	1	Cops3
NM_012008	NM_012008	26900	chrY	1260715	1286613	-	4621	1	Ddx3y
NM_012009	NM_012009	26904	chr1	170277324	170285662	+	1427	1	Sh2d1b1
NM_012013	NM_012013	26910	chr6	86017191	86020996	+	754	1	Figla
NM_012034	NM_012034	26945	chr17	25370553	25374442	+	1210	1	Tpsg1
NM_012045	NM_012045	26971	chr4	138750533	138757598	-	2430	1	Pla2g2f
NM_001242580	NM_001242580	27045	chr1	171342237	171345645	-	1365	1	Nit1
NM_001082414	NM_001082414	27059	chr3	86084434	86130521	+	6396	1	Sh3d19
NM_013722	NM_013722	27204	chr10	86048746	86498896	-	8763	1	Syn3
NM_013735	NM_013735	27223	chr2	121194835	121271407	-	9594	1	Trp53bp1
NM_013739	NM_013739	27261	chr13	55523235	55528538	-	1539	1	Dok3
NM_013750	NM_013750	27280	chr1	135766085	135769134	+	1463	1	Phlda3
NM_013759	NM_013759	27361	chr17	24736642	24742778	+	880	1	Msrb1
NM_013762	NM_013762	27367	chr15	80077781	80083406	-	1349	1	Rpl3
NM_013782	NM_013782	27388	chr7	141131286	141156154	+	2158	1	Ptdss2
NM_013849	NM_013849	27389	chr14	21733395	21742879	-	1064	1	Dusp13
NM_013783	NM_013783	27390	chr4	154869585	154895530	+	2911	1	Mmel1
NM_175094	NM_175094	27402	chr2	103021057	103073513	-	2511	1	Pdhx
NM_172151	NM_172151	27801	chr16	18220753	18235136	-	4855	1	Zdhhc8
NM_030245	NM_030245	27878	chr1	166379167	166393620	+	2134	1	Tada1
NM_138583	NM_138583	27883	chr16	18300825	18343932	-	1503	1	Tango2
NM_138596	NM_138596	28077	chr13	69809882	69816094	+	856	1	Med10
NM_030685	NM_030685	28146	chr3	58521971	58525884	-	2444	1	Serp1
NM_053014	NM_053014	28169	chr10	78271563	78351700	-	3427	1	Agpat3
NM_138301	NM_138301	28240	chr10	77907722	77969872	-	7256	1	Trpm2
NM_013861	NM_013861	29807	chr6	43345001	43666278	-	2660	1	Tpk1
NM_013873	NM_013873	29859	chr15	84076097	84105754	-	2374	1	Sult4a1
NM_013886	NM_013886	29877	chr7	81881256	81934459	-	5860	1	Hdgfrp3
NM_001128599	NM_001128599	30044	chr14	34590618	34600142	-	2247	1	Opn4
NM_013888	NM_013888	30045	chr10	63386563	63408840	+	1282	1	Dnajc12
NM_013903	NM_013903	30800	chr9	7628231	7674968	+	3264	1	Mmp20
NM_153547	NM_153547	30877	chr14	31012433	31019131	-	1909	1	Gnl3
NM_013912	NM_013912	30878	chrX	48025146	48034852	-	3143	1	Apln
NM_013924	NM_013924	30946	chr13	23418361	23423866	-	4451	1	Abt1
NM_015765	NM_015765	50497	chr2	3488854	3512814	-	1775	1	Hspa14
NM_015798	NM_015798	50764	chr18	84935025	84981392	+	1574	1	Fbxo15
NM_015809	NM_015809	50775	chr7	142303502	142304503	+	999	1	Krtap5-4
NM_001290467	NM_001290467	50786	chrX	51386637	51681602	-	4668	1	Hs6st2
NM_016720	NM_016720	50877	chr7	99811439	99828417	-	3336	1	Neu3
NM_016717	NM_016717	50880	chr1	91298338	91321080	+	2193	1	Scly
NM_001290745	NM_001290745	50884	chr2	80500512	80581182	-	4371	1	Nckap1
NM_016710	NM_016710	50887	chrX	109004537	109013380	-	1899	1	Hmgn5
NM_016690	NM_016690	50926	chr5	100033579	100039222	-	2740	1	Hnrnpdl
NM_016758	NM_016758	51791	chr13	55369732	55384687	+	2339	1	Rgs14
NM_001190449	NM_001190449	51793	chr17	35059035	35062099	+	1341	1	Ddah2
NM_001109993	NM_001109993	51875	chr2	25620066	25622005	-	1049	1	Tmem141
NM_153387	NM_153387	51885	chr2	121171168	121198770	+	4233	1	Tubgcp4
NM_057172	NM_057172	51886	chr3	152210458	152236830	+	6469	1	Fubp1
NM_026373	NM_026373	52004	chr19	4097351	4099017	+	905	1	Cdk2ap2
NM_178608	NM_178608	52250	chr6	71707681	71810705	+	3790	1	Reep1
NM_026448	NM_026448	52323	chr5	24100590	24161231	+	3414	1	Klhl7
NM_027897	NM_027897	52428	chr7	35334237	35392287	+	3422	1	Rhpn2
NM_001253857	NM_001253857	52463	chr10	62804570	62880014	-	14069	1	Tet1
NM_026618	NM_026618	52469	chr11	101277970	101278948	-	714	1	Coa3
NM_001029990	NM_001029990	52535	chr14	51884842	51891868	+	1607	1	Mettl17
NM_145940	NM_145940	52639	chr11	109573521	109611389	-	1802	1	Wipi1
NM_001166413	NM_001166413	52666	chr10	127182521	127189823	-	2181	1	Arhgef25
NM_026790	NM_026790	52668	chr12	103434189	103440245	+	1044	1	Ifi27
NM_028262	NM_028262	52690	chr12	108106431	108179284	-	2710	1	Setd3
NM_178610	NM_178610	52705	chr10	111972695	111988430	+	4978	1	Krr1
NM_144833	NM_144833	52708	chr12	84316859	84343830	+	2683	1	Zfp410
NM_029643	NM_029643	52710	chr15	76538943	76542130	+	2693	1	Slc52a2
NM_001048229	NM_001048229	52840	chr2	164488111	164493323	+	3599	1	Dbndd2
NM_001040026	NM_001040026	52892	chr11	67052670	67067440	+	4272	1	Sco1
NM_016859	NM_016859	53414	chr17	47599331	47611492	-	3845	1	Bysl
NR_104053	NR_104053	53623	chrX	41401301	41678601	+	5293	1	Gria3
NM_016914	NM_016914	53856	chr2	84988215	84993886	+	941	1	Prg3
NM_016919	NM_016919	53867	chr9	20770050	20815034	-	6017	1	Col5a3
NM_021545	NM_021545	53880	chr13	100283115	100317688	-	4825	1	Naip7
NM_016922	NM_016922	53897	chr11	3983636	3999328	+	1963	1	Gal3st1
NM_001113518	NM_001113518	54126	chr8	11758330	11835217	+	4627	1	Arhgef7
NM_016881	NM_016881	54128	chr16	8637707	8657524	+	1791	1	Pmm2
NM_017405	NM_017405	54135	chr7	30957770	30973469	-	2165	1	Lsr
NM_017461	NM_017461	54204	chr7	127214442	127218445	-	1440	1	2019-09-01
NM_019423	NM_019423	54326	chr13	41182382	41220403	-	3827	1	Elovl2
NM_019428	NM_019428	54364	chr19	36083716	36104773	+	1143	1	Rpp30
NM_019431	NM_019431	54377	chr11	107734780	107794464	-	979	1	Cacng4
NM_176073	NM_176073	54381	chr15	33083129	33594552	+	1913	1	Cpq
NM_018794	NM_018794	54411	chrX	74297097	74304721	+	2177	1	Atp6ap1
NM_019445	NM_019445	54418	chr1	174501825	174822729	+	6422	1	Fmn2
NM_019454	NM_019454	54485	chr2	119325784	119335666	+	3438	1	Dll4
NM_018789	NM_018789	54601	chrX	101254528	101260873	+	3157	1	Foxo4
NM_018787	NM_018787	54615	chr15	102523839	102524621	-	441	1	Npff
NR_037581	NR_037581	54634	chrX	7673166	7681251	-	2762	1	Magix
NM_018805	NM_018805	54710	chr11	63884693	63922284	-	6000	1	Hs3st3b1
NM_001081549	NM_001081549	54720	chr16	92391951	92466169	-	2343	1	Rcan1
NM_018737	NM_018737	55936	chrX	162901595	163034541	+	5569	1	Ctps2
NM_019496	NM_019496	56068	chrX	142853474	142966728	-	3101	1	Ammecr1
NM_019546	NM_019546	56189	chr7	30493658	30513402	+	1805	1	Prodh2
NM_023190	NM_023190	56215	chr14	54642161	54686931	-	4714	1	Acin1
NM_001293688	NM_001293688	56229	chr8	22227303	22261332	+	4265	1	Thsd1
NM_019696	NM_019696	56264	chr2	130390775	130397629	-	2405	1	Cpxm1
NM_019833	NM_019833	56279	chr2	26628457	26636497	+	1615	1	Fam69b
NM_019873	NM_019873	56299	chr17	34644883	34646327	+	1150	1	Fkbpl
NM_019738	NM_019738	56312	chr7	126623246	126625470	-	621	1	Nupr1
NM_019874	NM_019874	56323	chr4	42953094	42958732	+	2304	1	Dnajb5
NM_019718	NM_019718	56350	chr19	46531109	46573085	-	814	1	Arl3
NM_019831	NM_019831	56364	chrX	101404384	101420222	-	5403	1	Zmym3
NM_019773	NM_019773	56382	chrX	166457252	166479867	-	1443	1	Rab9
NM_020491	NM_020491	56390	chr19	5730306	5731732	-	695	1	Sssca1
NM_019783	NM_019783	56401	chr4	119232915	119248977	+	3176	1	P3h1
NM_001162924	NM_001162924	56460	chr7	141078229	141090510	+	2892	1	Pkp3
NM_001047436	NM_001047436	56513	chr8	105701148	105703494	+	1275	1	Pard6a
NM_001253706	NM_001253706	56526	chrX	36913444	36989695	-	4701	1	2019-09-06
NM_019945	NM_019945	56527	chr8	84911853	84937353	-	4894	1	Mast1
NM_019966	NM_019966	56690	chr8	119394892	119411088	+	2093	1	Mlycd
NM_019969	NM_019969	56711	chr4	3901158	3938405	-	4627	1	Plag1
NM_020009	NM_020009	56717	chr4	148448582	148557685	+	8535	1	Mtor
NM_019989	NM_019989	56726	chrX	109095407	109162467	+	2830	1	Sh3bgrl
NM_019977	NM_019977	56727	chr15	89334473	89337007	+	1035	1	Miox
NM_019981	NM_019981	56746	chr7	24668012	24672050	-	1046	1	Tex101
NM_019985	NM_019985	56760	chr6	129397297	129405413	+	1162	1	Clec1b
NM_019950	NM_019950	56773	chr8	111889135	111910199	-	1931	1	Chst5
NM_019975	NM_019975	56794	chr14	31607226	31640965	-	2599	1	Hacl1
NM_020256	NM_020256	56805	chrX	38189793	38197046	+	5118	1	Zbtb33
NM_020270	NM_020270	56807	chr9	57441327	57468060	-	3218	1	Scamp5
NM_194263	NM_194263	57246	chr9	24720812	24774303	-	6426	1	Tbx20
NM_022984	NM_022984	57264	chr8	3655770	3658095	+	1132	1	Retn
NM_020564	NM_020564	57429	chr8	123142847	123158280	-	1151	1	Sult5a1
NM_020566	NM_020566	57431	chr19	6987911	6992272	-	832	1	Dnajc4
NM_212433	NM_212433	57443	chr2	104027799	104063237	+	4646	1	Fbxo3
NM_001004468	NM_001004468	57752	chr7	130577484	130764782	+	9079	1	Tacc2
NM_001271476	NM_001271476	57757	chr17	32412461	32424167	-	2807	1	Pglyrp2
NM_001130484	NM_001130484	57808	chr16	33056482	33060188	+	499	1	Rpl35a
NM_022313	NM_022313	57837	chr11	78073376	78080383	-	2002	1	Eral1
NM_021390	NM_021390	58198	chr8	89027243	89044162	-	5251	1	Sall1
NM_001164197	NM_001164197	58223	chr10	128790910	128800824	+	3264	1	Mmp19
NM_021447	NM_021447	58522	chr5	31116612	31137626	+	1521	1	Trim54
NM_153574	NM_153574	58909	chr6	58933536	59024502	-	4273	1	Fam13a
NM_021508	NM_021508	59011	chr14	20649102	20656540	-	1286	1	Myoz1
NM_001142655	NM_001142655	59046	chr9	75037614	75060313	+	3957	1	Arpp19
NM_021552	NM_021552	59050	chr13	97129427	97137926	-	2678	1	Nsa2
NM_001205076	NM_001205076	59091	chr2	163336242	163397993	-	4146	1	Jph2
NM_021610	NM_021610	59290	chr1	166130460	166166510	+	2284	1	Gpa33
NM_024177	NM_024177	60441	chr11	116131817	116138868	-	1400	1	Mrpl38
NM_021921	NM_021921	60597	chr15	89453911	89462447	+	3525	1	Mapk8ip2
NM_001038699	NM_001038699	63828	chr11	121434953	121443505	+	3850	1	Fn3k
NM_022019	NM_022019	63953	chr1	184034461	184075636	+	2706	1	Dusp10
NM_022021	NM_022021	63955	chr18	11839274	11945627	+	3254	1	Cables1
NM_022413	NM_022413	64177	chr6	41620619	41636405	-	2911	1	Trpv6
NM_022418	NM_022418	64295	chr5	24445463	24447846	-	1315	1	Tmub1
NM_022430	NM_022430	64381	chr19	11067471	11081103	-	1073	1	Ms4a8a
NM_001177804	NM_001177804	64384	chr7	140863663	140881869	-	1406	1	Sirt3
NM_023219	NM_023219	64454	chr10	76058621	76111018	-	2115	1	Slc5a4b
NM_022656	NM_022656	64652	chr14	31170928	31206826	-	5563	1	Nisch
NM_001141949	NM_001141949	64685	chr2	51948499	51973208	-	1357	1	Nmi
NM_025312	NM_025312	66042	chr12	36314169	36318452	+	1747	1	Sostdc1
NM_025344	NM_025344	66085	chr7	108934415	108941942	+	1497	1	Eif3f
NM_025351	NM_025351	66098	chr6	89383146	89595652	-	1116	1	Chchd6
NM_001164729	NM_001164729	66119	chr17	47686645	47688386	-	1002	1	Tomm6
NM_024169	NM_024169	66120	chr15	98724368	98728198	-	728	1	Fkbp11
NM_025373	NM_025373	66132	chr12	55302637	55382491	+	3108	1	1110008L16Rik
NM_025380	NM_025380	66143	chr13	38645691	38659028	-	1033	1	Eef1e1
NM_025399	NM_025399	66174	chr12	112934291	112942142	-	1252	1	Nudt14
NM_025410	NM_025410	66192	chrX	74352162	74353618	-	755	1	Lage3
NM_025418	NM_025418	66201	chr10	14655333	14705489	-	1315	1	Vta1
NM_025431	NM_025431	66225	chr10	120227060	120232070	+	1157	1	Llph
NM_001285780	NM_001285780	66231	chr14	13949012	13961313	-	1040	1	Thoc7
NM_025437	NM_025437	66235	chrX	159372195	159385699	+	917	1	Eif1ax
NM_025439	NM_025439	66241	chr1	136018001	136035030	+	1452	1	Tmem9
NM_025458	NM_025458	66269	chr8	107061484	107065644	-	857	1	Tmed6
NR_027821	NR_027821	66293	chr11	116671660	116675798	+	1992	1	1810032O08Rik
NM_025498	NM_025498	66340	chr7	30561866	30563184	-	644	1	Psenen
NM_175106	NM_175106	66343	chr1	119907899	119913168	-	3288	1	Tmem177
NM_025516	NM_025516	66366	chr2	156008125	156018279	+	1282	1	Ergic3
NM_023200	NM_023200	66385	chr1	93343645	93367618	+	3641	1	Ppp1r7
NM_001113562	NM_001113562	66388	chr19	43753023	43768638	+	1297	1	Cutc
NM_025540	NM_025540	66402	chr9	53850251	53853849	+	516	1	Sln
NM_025541	NM_025541	66403	chr10	53596961	53609215	+	2176	1	Asf1a
NM_025543	NM_025543	66405	chr2	152687148	152687942	+	792	1	Mcts2
NM_025550	NM_025550	66413	chr14	14112185	14120904	-	1286	1	Psmd6
NM_001007567	NM_001007567	66432	chr8	106200438	106210933	-	1518	1	Slc7a6os
NM_025564	NM_025564	66441	chr6	131284389	131293244	-	759	1	Magohb
NM_025598	NM_025598	66496	chr2	181187343	181188504	+	790	1	Ppdpf
NM_025615	NM_025615	66523	chr8	124839355	124863029	-	1373	1	2810004N23Rik
NM_024432	NM_024432	66530	chr17	56068253	56074989	-	1689	1	Ubxn6
NR_104340	NR_104340	66548	chr10	80339793	80348448	-	3544	1	Adamtsl5
NM_001081090	NM_001081090	66580	chr2	140119881	140170558	-	3376	1	Esf1
NM_025655	NM_025655	66601	chr11	76904545	76916586	+	1358	1	Tmigd1
NR_015473	NR_015473	66602	chr2	119594296	119600744	+	1546	1	1700020I14Rik
NR_110495	NR_110495	66620	chr1	42707063	42713454	-	457	1	Pantr2
NM_025669	NM_025669	66625	chr4	21847583	21876475	+	4531	1	Pnisr
NM_001004361	NM_001004361	66648	chr18	25136039	25168877	-	4018	1	Tpgs2
NM_025691	NM_025691	66661	chr5	76974701	76999935	+	3584	1	Srp72
NM_025712	NM_025712	66696	chr15	36504062	36555572	-	2679	1	Snx31
NM_025716	NM_025716	66701	chr10	128209910	128211794	-	1564	1	Spryd4
NM_023247	NM_023247	66706	chr9	108565865	108567342	-	1060	1	Ndufaf3
NM_025752	NM_025752	66765	chr19	42052228	42053628	+	1398	1	4933411K16Rik
NR_033197	NR_033197	66769	chr15	74709161	74710374	+	1213	1	4933427E11Rik
NM_025757	NM_025757	66771	chr11	60417145	60445277	+	4392	1	Gid4
NM_178613	NM_178613	66787	chr12	105685352	105703057	+	2781	1	Gskip
NM_133681	NM_133681	66805	chr4	116161881	116167598	-	1961	1	Tspan1
NM_025776	NM_025776	66810	chr18	60560786	60572729	+	2066	1	Rbm22
NM_025780	NM_025780	66816	chr10	115369966	115384435	-	3403	1	Thap2
NM_025785	NM_025785	66822	chr8	13907806	13940521	+	1996	1	Fbxo25
NM_023258	NM_023258	66824	chr7	127991373	127993867	-	2130	1	Pycard
NM_025786	NM_025786	66825	chr4	138967112	138968366	+	1252	1	Rnf186
NM_024180	NM_024180	66844	chr10	128817457	128821631	-	2049	1	Ormdl2
NM_025807	NM_025807	66859	chr10	70245276	70285951	+	3555	1	Slc16a9
NM_025817	NM_025817	66873	chr6	53815468	53820825	-	5355	1	Tril
NM_025826	NM_025826	66885	chr7	131410601	131446211	+	3335	1	Acadsb
NM_025867	NM_025867	66957	chr1	107362314	107380475	+	1689	1	Serpinb11
NM_153775	NM_153775	66965	chr8	122476143	122483092	+	3049	1	Ctu2
NM_023284	NM_023284	66977	chr1	169497934	169531464	-	2389	1	Nuf2
NM_001145780	NM_001145780	67023	chr8	71366848	71369732	+	1056	1	Use1
NM_025932	NM_025932	67043	chrX	162856843	162888462	-	2305	1	Syap1
NM_024190	NM_024190	67064	chr18	67205359	67207887	+	2526	1	Chmp1b
NM_025948	NM_025948	67070	chr7	34344720	34389540	-	2710	1	Lsm14a
NM_025961	NM_025961	67092	chr2	122594473	122611277	-	2346	1	Gatm
NM_023304	NM_023304	67112	chr10	79755119	79756961	+	485	1	Fgf22
NM_175116	NM_175116	67168	chr14	73237891	73240358	+	2465	1	Lpar6
NM_026018	NM_026018	67182	chr4	115088708	115093894	+	890	1	Pdzk1ip1
NM_026025	NM_026025	67197	chr15	93386113	93398290	-	816	1	Zcrb1
NM_001285503	NM_001285503	67203	chr16	14163275	14192923	+	2399	1	Nde1
NM_026035	NM_026035	67212	chr11	59202486	59206135	+	938	1	Mrpl55
NM_144517	NM_144517	67249	chr5	53809627	53904380	+	2665	1	Tbc1d19
NM_026088	NM_026088	67317	chr4	42969946	42974325	+	3722	1	1700022I11Rik
NM_026092	NM_026092	67328	chr18	4165832	4182236	+	843	1	Lyzl1
NM_026099	NM_026099	67343	chr18	56588348	56594779	+	559	1	Tex43
NR_033788	NR_033788	67355	chr14	61292983	61305334	-	795	1	1700109G14Rik
NM_026113	NM_026113	67371	chr10	40249203	40257665	-	1012	1	Gtf3c6
NM_026125	NM_026125	67389	chr4	155962312	155966629	+	1311	1	Fam132a
NM_026141	NM_026141	67418	chr10	7792894	7822563	+	2881	1	Ppil4
NM_026152	NM_026152	67432	chr19	42045851	42070939	+	1626	1	Hoga1
NM_026161	NM_026161	67445	chr2	90885786	90890526	+	1361	1	C1qtnf4
NM_175118	NM_175118	67446	chr1	92906989	92908620	+	1487	1	Dusp28
NM_026169	NM_026169	67457	chr19	5850974	5875208	-	3154	1	Frmd8
NM_026183	NM_026183	67473	chr11	61343400	61378075	-	2615	1	Slc47a1
NM_026209	NM_026209	67509	chr14	20075636	20083172	-	2300	1	Saysd1
NM_026219	NM_026219	67530	chr13	66900621	66905350	-	497	1	Uqcrb
NM_026229	NM_026229	67549	chr3	96871066	96905298	-	1749	1	Gpr89
NM_001164237	NM_001164237	67588	chr10	128411616	128441441	+	4368	1	Rnf41
NM_026261	NM_026261	67591	chr3	107553698	107555073	-	1373	1	Ubl4b
NM_183264	NM_183264	67596	chr10	130322852	130362642	+	1683	1	Tespa1
NM_026277	NM_026277	67619	chr8	107412489	107425038	-	1636	1	Nob1
NM_026280	NM_026280	67622	chr11	116803400	116828046	-	1719	1	Mxra7
NR_015490	NR_015490	67654	chr3	95386458	95402841	-	732	1	4930558C23Rik
NM_001291287	NM_001291287	67669	chr7	89918685	89941204	-	1124	1	l7Rn6
NM_026319	NM_026319	67694	chr4	94614491	94693233	+	2121	1	Ift74
NR_027875	NR_027875	67705	chr6	35252732	35262059	+	1266	1	1810058I24Rik
NM_026338	NM_026338	67722	chr9	107928469	107932461	+	3990	1	Actl11
NM_026352	NM_026352	67738	chr3	79591389	79603650	+	1716	1	Ppid
NR_073429	NR_073429	67746	chr3	51276761	51278407	+	1646	1	4930577N17Rik
NM_026370	NM_026370	67773	chr7	127912517	127925762	+	1490	1	Kat8
NR_028316	NR_028316	67881	chr14	55657879	55660508	-	1797	1	Mdp1
NR_015476	NR_015476	67885	chr2	127791377	127792488	-	809	1	1500011K16Rik
NM_026436	NM_026436	67893	chr7	47050640	47054776	+	1786	1	Tmem86a
NR_027883	NR_027883	67927	chr11	109346867	109353651	+	452	1	1700096J18Rik
NM_018860	NM_018860	67945	chr10	128548110	128549168	-	443	1	Rpl41
NM_026479	NM_026479	67966	chr11	53324689	53333301	+	1251	1	Zcchc10
NM_026480	NM_026480	67968	chr9	78376903	78378588	-	1202	1	Ooep
NM_026485	NM_026485	67976	chr15	89076064	89087075	+	2374	1	Trabd
NM_023420	NM_023420	68018	chr13	96542735	96640167	+	5343	1	Col4a3bp
NM_024216	NM_024216	68080	chr5	122372508	122382769	+	1392	1	Gpn3
NM_023429	NM_023429	68095	chr5	73292794	73314077	+	1518	1	Ociad1
NM_026558	NM_026558	68099	chr4	12153142	12172015	-	1896	1	Fam92a
NR_015463	NR_015463	68108	chr2	158353700	158361509	-	3153	1	Snhg17
NM_026563	NM_026563	68112	chr2	26382800	26389316	-	2183	1	Sdccag3
NM_026565	NM_026565	68117	chrX	112311352	112372755	+	1330	1	Apool
NM_080635	NM_080635	68135	chr15	51786563	51865461	-	1218	1	Eif3h
NM_026577	NM_026577	68146	chr16	62793689	62847040	-	3512	1	Arl13b
NM_026596	NM_026596	68175	chr2	179414936	179416880	+	730	1	4930591A17Rik
NM_026605	NM_026605	68188	chr7	19024377	19054622	+	4092	1	Sympk
NR_027915	NR_027915	68232	chr7	127603903	127604445	-	542	1	1700120K04Rik
NR_027969	NR_027969	68271	chr13	67729262	67756838	+	2905	1	Zfp85os
NM_026672	NM_026672	68312	chr3	107926334	107931745	-	1295	1	Gstm7
NM_026673	NM_026673	68316	chrX	94367110	94417092	+	911	1	Apoo
NM_026677	NM_026677	68328	chr3	90220784	90226387	+	1518	1	Rab13
NM_023463	NM_023463	68468	chr17	35067325	35070048	+	955	1	Ly6g6c
NM_026734	NM_026734	68472	chr7	90468829	90475995	-	855	1	Tmem126b
NM_026741	NM_026741	68490	chr7	4992852	4996101	-	2155	1	Zfp579
NM_026752	NM_026752	68520	chr12	111814170	111828388	+	1301	1	Zfyve21
NM_197940	NM_197940	68524	chr11	98863598	98905578	+	7579	1	Wipf2
NM_001162998	NM_001162998	68528	chr11	115912017	115913917	+	971	1	Smim6
NR_027930	NR_027930	68531	chr17	84954967	84957710	-	851	1	1110020A21Rik
NM_024228	NM_024228	68616	chr7	126766414	126775645	+	1056	1	Gdpd3
NM_026787	NM_026787	68618	chrX	70385913	70389416	+	1052	1	1110012L19Rik
NM_001277861	NM_001277861	68642	chr19	10550461	10555763	-	1035	1	Tmem216
NM_024230	NM_024230	68678	chr2	84811176	84822652	-	1751	1	Smtnl1
NR_045139	NR_045139	68690	chr11	87699524	87705327	+	2703	1	1110028F11Rik
NM_026812	NM_026812	68695	chr7	80343137	80346097	+	854	1	Hddc3
NM_026831	NM_026831	68753	chr3	108364911	108380057	+	1265	1	Mybphl
NM_026836	NM_026836	68776	chr17	27901128	27907724	-	1213	1	Taf11
NM_182992	NM_182992	68802	chr10	63115795	63203952	-	5224	1	Mypn
NM_199465	NM_199465	68810	chr3	152236984	152266320	-	2549	1	Nexn
NM_001013019	NM_001013019	68852	chr19	8850785	8853909	+	2579	1	Lrrn4cl
NM_001033039	NM_001033039	68874	chr1	171358449	171360798	-	1549	1	Klhdc9
NM_001164607	NM_001164607	68877	chr15	76351294	76354378	+	1738	1	Maf1
NM_026866	NM_026866	68897	chr1	183086264	183221529	-	5018	1	Disp1
NM_144536	NM_144536	68916	chr13	29325301	29855673	-	2611	1	Cdkal1
NR_045817	NR_045817	68994	chr19	20405288	20422785	+	775	1	1500015L24Rik
NM_026902	NM_026902	68995	chrX	38600658	38613522	+	868	1	Mcts1
NM_026922	NM_026922	69047	chr8	119700009	119757718	+	3194	1	Atp2c2
NM_026954	NM_026954	69136	chr4	93334148	93335511	-	1361	1	Tusc1
NM_026961	NM_026961	69147	chr7	30698926	30700534	+	604	1	2200002J24Rik
NM_026976	NM_026976	69169	chr1	130865777	130880790	+	1481	1	Fcmr
NM_026984	NM_026984	69188	chr5	23434429	23504229	+	7230	1	Kmt2e
NM_027101	NM_027101	69241	chr18	31789176	31796701	+	992	1	Polr2d
NM_133710	NM_133710	69274	chr9	118926536	119044119	+	4617	1	Ctdspl
NM_027019	NM_027019	69287	chr7	140847916	140850925	+	915	1	Odf3
NM_153390	NM_153390	69307	chr17	28933986	28942262	-	1010	1	Pxt1
NR_036590	NR_036590	69319	chr19	53248736	53255205	-	485	1	1700001K23Rik
NM_029306	NM_029306	69325	chr9	14758194	14771030	-	679	1	1700012B09Rik
NM_027046	NM_027046	69339	chr16	50589859	50591154	-	1293	1	Ccdc54
NM_027052	NM_027052	69354	chr15	96994823	97055956	-	3914	1	Slc38a4
NM_027055	NM_027055	69363	chr7	45725107	45725816	-	707	1	Spaca4
NM_027062	NM_027062	69379	chr2	25498650	25500506	-	1035	1	C8g
NM_027081	NM_027081	69440	chr15	89182213	89196474	-	4589	1	Dennd6b
NM_001081961	NM_001081961	69462	chr15	74742839	74746687	-	459	1	2300005B03Rik
NR_045489	NR_045489	69491	chr13	44439727	44457567	+	561	1	1700029N11Rik
NM_175148	NM_175148	69542	chr17	35567485	35568945	+	1244	1	2300002M23Rik
NM_027116	NM_027116	69547	chr7	19518731	19525050	+	2747	1	Nkpd1
NM_175149	NM_175149	69551	chr8	124635756	124663369	-	3301	1	2310022B05Rik
NM_001080708	NM_001080708	69553	chr2	167980786	168010593	-	2911	1	Fam65c
NM_027120	NM_027120	69564	chr10	81198170	81202037	-	1831	1	Nmrk2
NM_027122	NM_027122	69572	chr15	76701542	76704239	+	2162	1	Mfsd3
NM_027127	NM_027127	69590	chr13	113042763	113046388	-	1011	1	Gpx8
NM_178618	NM_178618	69640	chr11	61684410	61709950	+	4779	1	Fam83g
NM_027161	NM_027161	69671	chr4	155469114	155470858	+	961	1	Tmem52
NM_144829	NM_144829	69684	chr11	101406840	101417433	-	1319	1	Aarsd1
NM_027189	NM_027189	69731	chr7	19564949	19573343	-	759	1	Gemin7
NM_027206	NM_027206	69769	chr3	95139521	95142360	-	1118	1	Tnfaip8l2
NM_001145198	NM_001145198	69784	chr10	83722865	83762762	+	1186	1	1500009L16Rik
NR_038153	NR_038153	69798	chr6	91440987	91441755	+	484	1	1810044D09Rik
NM_027217	NM_027217	69809	chr9	51289686	51328917	-	1311	1	1810046K07Rik
NM_027227	NM_027227	69824	chrX	8004201	8018492	-	666	1	Glod5
NM_027237	NM_027237	69861	chr19	4496788	4498583	-	1163	1	2010003K11Rik
NR_028574	NR_028574	69895	chr3	123507552	123508336	-	784	1	Snhg8
NM_178620	NM_178620	69900	chr11	116854015	116875637	+	3090	1	Mfsd11
NM_023537	NM_023537	69908	chr4	108879070	108943324	+	3313	1	Rab3b
NM_145706	NM_145706	69912	chr10	7667504	7678886	+	1280	1	Nup43
NR_038156	NR_038156	69918	chr16	11203383	11225796	+	2153	1	2610020C07Rik
NM_172403	NM_172403	69944	chr11	58867240	58884338	+	4885	1	2810021J22Rik
NM_027278	NM_027278	69961	chr4	41712033	41713517	-	835	1	Rpp25l
NR_015493	NR_015493	69964	chrX	108834478	108886896	+	1000	1	2810403D21Rik
NR_033605	NR_033605	70001	chr7	28496941	28497492	+	551	1	1700028B04Rik
NR_045304	NR_045304	70011	chr19	3153799	3197703	-	392	1	1700030N03Rik
NM_027292	NM_027292	70026	chr17	48448435	48451501	-	928	1	Tspo2
NM_197993	NM_197993	70044	chr19	8953850	8966210	+	2739	1	Tut1
NM_001242358	NM_001242358	70047	chr6	106769138	106782474	+	2300	1	Trnt1
NM_027300	NM_027300	70060	chr1	86021942	86029958	+	1101	1	Spata3
NM_027301	NM_027301	70061	chr10	127898535	127911759	+	2843	1	Sdr9c7
NR_037997	NR_037997	70100	chr16	13514131	13520419	-	2913	1	2310015D24Rik
NM_027327	NM_027327	70123	chrX	153723554	153741296	+	850	1	2210013O21Rik
NR_028285	NR_028285	70138	chr5	148741840	148743139	+	548	1	2210417A02Rik
NM_027350	NM_027350	70223	chr18	64499647	64516557	-	2630	1	Nars
NR_033561	NR_033561	70226	chrX	8145427	8147963	+	837	1	Rbm3os
NM_027360	NM_027360	70257	chr12	111961376	111966977	-	360	1	2010107E04Rik
NM_027363	NM_027363	70261	chr7	122219496	122222539	+	1162	1	Chp2
NM_027404	NM_027404	70369	chr12	111709490	111713256	-	2132	1	Bag5
NM_027407	NM_027407	70375	chr1	59989068	60043122	-	3672	1	Ica1l
NM_183285	NM_183285	70382	chr11	115420126	115431274	+	1758	1	Kctd2
NR_045499	NR_045499	70393	chr11	88098058	88100107	+	1500	1	2210416O15Rik
NM_001291001	NM_001291001	70426	chr16	10357952	10395465	-	1765	1	Tekt5
NM_027422	NM_027422	70427	chr10	79540245	79555128	-	2583	1	Mier2
NM_181589	NM_181589	70466	chr2	129268210	129297212	-	3126	1	Ckap2l
NM_027769	NM_027769	70568	chr4	19519252	19570104	-	5628	1	Cpne3
NM_027476	NM_027476	70605	chr19	4878668	4885397	+	2557	1	Zdhhc24
NR_028126	NR_028126	70720	chr4	3714964	3716806	+	1842	1	6330407A03Rik
NM_027526	NM_027526	70727	chr6	118066385	118091546	+	3221	1	Rasgef1a
NM_153551	NM_153551	70785	chr17	57066055	57078510	-	2495	1	Dennd1c
NM_001168224	NM_001168224	70809	chr6	128971160	128984707	+	2396	1	Clec2g
NM_133730	NM_133730	70810	chr11	99315844	99322941	-	1641	1	Krt25
NM_027571	NM_027571	70839	chr3	59216271	59262831	-	2332	1	P2ry12
NR_045827	NR_045827	70852	chr2	93980034	93983575	+	1546	1	4921507L20Rik
NM_027618	NM_027618	70952	chr8	27447670	27495172	+	1690	1	Poteg
NM_027635	NM_027635	70981	chr2	23207476	23267129	+	1829	1	4931423N10Rik
NR_045503	NR_045503	71000	chr14	62760501	62830126	+	884	1	4931440J10Rik
NR_027955	NR_027955	71004	chr3	65527485	65529414	-	1857	1	4931440P22Rik
NR_045431	NR_045431	71008	chr17	15631788	15641102	+	1321	1	4933401D09Rik
NM_027650	NM_027650	71026	chr5	13791619	13796819	+	1184	1	Speer3
NR_040540	NR_040540	71038	chr3	135833694	135840269	-	932	1	4933401H06Rik
NR_045840	NR_045840	71082	chr8	27142910	27149706	+	1516	1	4933416M07Rik
NM_027695	NM_027695	71147	chr14	16238659	16249808	-	3747	1	Oxsm
NM_027704	NM_027704	71164	chr13	73963862	73992840	+	1289	1	Zdhhc11
NR_040290	NR_040290	71166	chr1	36714538	36757960	+	1118	1	4933424G06Rik
NR_045846	NR_045846	71174	chr13	101254319	101293396	+	1279	1	4933416M06Rik
NM_027724	NM_027724	71213	chr13	38006052	38036937	-	2843	1	Cage1
NM_027726	NM_027726	71228	chr14	24133953	24245920	-	7751	1	Dlg5
NM_027744	NM_027744	71275	chr12	87221123	87238601	-	1402	1	Noxred1
NR_040644	NR_040644	71293	chr4	40482840	40525548	-	811	1	4933428C19Rik
NR_045857	NR_045857	71316	chr11	24481909	24569951	+	739	1	4933430M04Rik
NM_027780	NM_027780	71390	chr13	73699826	73709856	+	1531	1	Slc6a19os
NR_015467	NR_015467	71445	chrX	105040854	105070124	-	3727	1	5530601H04Rik
NM_027816	NM_027816	71519	chr3	131290491	131303227	-	2324	1	Cyp2u1
NR_045878	NR_045878	71528	chr16	30021842	30039479	-	1205	1	9030404E10Rik
NR_110446	NR_110446	71545	chr18	74972764	74981547	-	1040	1	9030625G05Rik
NM_027827	NM_027827	71562	chr11	117825919	117839908	+	2319	1	Afmid
NM_027875	NM_027875	71709	chr10	78584503	78591964	-	3278	1	Syde1
NM_027882	NM_027882	71722	chr7	25282179	25294159	+	6088	1	Cic
NM_001168292	NM_001168292	71750	chr10	127390311	127499384	+	4002	1	R3hdm2
NM_027903	NM_027903	71755	chr7	45473563	45488796	-	2729	1	Dhdh
NR_045888	NR_045888	71818	chr12	88365314	88377323	-	2280	1	3200001D21Rik
NM_027948	NM_027948	71837	chr6	83156404	83162975	+	2044	1	1700003E16Rik
NM_027964	NM_027964	71861	chr2	83915079	83941226	-	2051	1	Zswim2
NM_027998	NM_027998	71908	chr8	35824709	35826559	-	1848	1	Cldn23
NM_027999	NM_027999	71909	chr7	30653708	30664994	-	2174	1	Haus5
NM_028005	NM_028005	71923	chr11	69059775	69061576	+	1799	1	Borcs6
NM_028006	NM_028006	71924	chr10	39134023	39151058	+	2915	1	Tube1
NM_028011	NM_028011	71943	chr11	90645691	90687601	-	2075	1	Tom1l1
NM_001271538	NM_001271538	71960	chr7	44605803	44665503	-	6472	1	Myh14
NM_028022	NM_028022	71962	chr11	4218251	4222409	+	1537	1	Gatsl3
NM_028024	NM_028024	71966	chr11	100622955	100627602	+	2007	1	Nkiras2
NM_028030	NM_028030	71973	chr9	65630582	65660518	+	1946	1	Rbpms2
NM_023637	NM_023637	71984	chr7	28741968	28753879	+	1892	1	Sars2
NM_028038	NM_028038	71986	chr8	106009616	106011486	-	1868	1	Ddx28
NM_028042	NM_028042	71991	chr13	108158738	108194981	+	2093	1	Ercc8
NM_001166206	NM_001166206	71995	chr2	131853678	131859747	-	3374	1	Erv3
NM_001163032	NM_001163032	72003	chr14	13453958	13615469	+	2650	1	Synpr
NM_028060	NM_028060	72022	chr9	53771535	53818161	+	2558	1	Slc35f2
NM_023645	NM_023645	72050	chr1	44106546	44118773	-	2312	1	Kdelc1
NM_172413	NM_172413	72065	chrX	51003914	51018018	-	3538	1	Rap2c
NR_045438	NR_045438	72076	chr18	46464934	46465816	-	882	1	Mospd4
NM_028097	NM_028097	72098	chr4	3549041	3574768	-	2595	1	Tmem68
NM_028120	NM_028120	72140	chr7	35397093	35438684	+	2546	1	Cep89
NM_028130	NM_028130	72154	chr5	138441476	138460694	+	5297	1	Zfp157
NM_175178	NM_175178	72168	chr16	17489677	17507485	+	2651	1	Aifm3
NM_181590	NM_181590	72171	chr6	100571811	100671157	-	3248	1	Shq1
NM_024445	NM_024445	72236	chr8	105827744	105844676	+	2192	1	Tsnaxip1
NR_045171	NR_045171	72243	chr10	127667123	127668851	+	693	1	1700012D01Rik
NR_003953	NR_003953	72252	chr5	24645453	24648860	+	1446	1	1700022A21Rik
NM_029911	NM_029911	72258	chr12	98429437	98578213	-	7354	1	Kcnk10
NR_045903	NR_045903	72259	chr8	121544388	121547652	+	961	1	1700030M09Rik
NM_001099917	NM_001099917	72273	chr10	81393064	81395079	+	569	1	Smim24
NM_028179	NM_028179	72275	chr7	29247521	29248467	-	501	1	2200002D01Rik
NM_028186	NM_028186	72293	chr13	73819328	73847631	-	3210	1	Nkd2
NM_028189	NM_028189	72297	chr8	71691720	71701800	-	2097	1	B3gnt3
NR_040609	NR_040609	72340	chr2	158070364	158091797	-	566	1	2010009K17Rik
NM_172414	NM_172414	72350	chr12	85288591	85299358	+	4477	1	Zc2hc1c
NM_023663	NM_023663	72388	chr16	97741942	97763755	-	3540	1	Ripk4
NM_133743	NM_133743	72434	chr7	24636570	24641118	+	1622	1	Lypd3
NM_001081077	NM_001081077	72502	chr19	44108637	44135876	-	3565	1	Cwf19l1
NM_175639	NM_175639	72515	chr17	71616215	71659031	+	3430	1	Wdr43
NM_001163538	NM_001163538	72542	chr5	110259135	110269899	-	2071	1	Pgam5
NM_028276	NM_028276	72554	chrX	48256934	48282449	+	2414	1	Utp14a
NM_028295	NM_028295	72599	chr16	35397312	35490873	-	1790	1	Pdia5
NR_045905	NR_045905	72608	chr3	5177824	5220823	-	779	1	2700069I18Rik
NM_001033166	NM_001033166	72657	chr2	84669221	84670708	-	673	1	2700094K13Rik
NM_001014761	NM_001014761	72821	chr9	45117876	45130070	+	4556	1	Scn2b
NR_045176	NR_045176	72834	chr17	25570811	25575043	+	1347	1	2810468N07Rik
NM_028370	NM_028370	72836	chr17	55652025	55712628	-	3480	1	Pot1b
NM_175189	NM_175189	72927	chr9	37367606	37386571	+	3079	1	Hepacam
NM_145221	NM_145221	72993	chr14	26918988	26970551	-	6937	1	Appl1
NM_001042710	NM_001042710	73106	chr10	79781474	79788985	-	2686	1	Prss57
NM_001291069	NM_001291069	73124	chr3	75876183	75956949	-	4533	1	Golim4
NM_175194	NM_175194	73132	chr10	62920633	62946494	+	3130	1	Slc25a16
NM_028460	NM_028460	73182	chr3	87749097	87768953	-	4474	1	Pear1
NM_175195	NM_175195	73218	chr10	80855275	80868708	+	2852	1	Sppl2b
NM_028473	NM_028473	73234	chr1	87470264	87475459	+	457	1	3110079O15Rik
NR_001581	NR_001581	73266	chr13	3149475	3189678	+	974	1	Speer6-ps1
NR_045315	NR_045315	73322	chr19	44828493	44835938	-	767	1	1700039E22Rik
NM_152801	NM_152801	73341	chrX	57231485	57338729	-	4545	1	Arhgef6
NM_028522	NM_028522	73376	chr15	78378400	78395912	-	1063	1	Tex33
NR_040465	NR_040465	73426	chr1	39842428	39847330	-	526	1	1700066B17Rik
NM_028572	NM_028572	73569	chr16	65815633	65863066	+	3325	1	Vgll3
NR_045936	NR_045936	73591	chr14	39655663	39685293	+	392	1	1700109I08Rik
NM_028584	NM_028584	73608	chr8	109952909	109962205	-	2446	1	Marveld3
NM_001201333	NM_001201333	73667	chr12	17004958	17011727	-	1752	1	2410004P03Rik
NR_040652	NR_040652	73696	chr4	34909789	34911481	-	948	1	Platr9
NM_028633	NM_028633	73738	chrX	73437315	73459029	-	1353	1	Haus7
NR_024067	NR_024067	73824	chr1	9942025	9944118	-	403	1	Snhg6
NM_028662	NM_028662	73836	chr17	45564152	45567669	+	2133	1	Slc35b2
NM_028664	NM_028664	73844	chr1	161142712	161170507	+	3714	1	Ankrd45
NM_022031	NM_022031	73940	chr3	88021750	88027511	-	2046	1	Hapln2
NR_038035	NR_038035	73968	chr10	18797299	18831930	-	858	1	4930444F02Rik
NM_001080995	NM_001080995	74041	chr7	92857527	92874232	-	3440	1	Ddias
NM_028730	NM_028730	74043	chr6	121183667	121196192	+	4086	1	Pex26
NR_044986	NR_044986	74076	chr12	32919384	32953789	-	1627	1	4933406C10Rik
NR_045447	NR_045447	74092	chr17	29578816	29596305	-	1345	1	Tbc1d22bos
NM_023733	NM_023733	74114	chr5	8966048	8997146	-	2783	1	Crot
NM_028770	NM_028770	74127	chr15	101349571	101370125	-	1763	1	Krt80
NM_028774	NM_028774	74132	chr5	146209194	146221457	-	3345	1	Rnf6
NM_024262	NM_024262	74133	chr11	87077732	87086777	-	3215	1	Smg8
NM_028775	NM_028775	74134	chr7	25802476	25816530	-	2610	1	Cyp2s1
NM_028787	NM_028787	74150	chr1	125561016	125595684	+	2579	1	Slc35f5
NM_144534	NM_144534	74166	chr8	72572103	72587284	+	2088	1	Tmem38a
NM_028798	NM_028798	74175	chr3	93014205	93015686	-	713	1	Crct1
NR_038055	NR_038055	74184	chr11	67112461	67120080	-	2719	1	2310065F04Rik
NM_133756	NM_133756	74254	chr5	31494761	31511627	+	1831	1	Gpn1
NM_028850	NM_028850	74277	chr5	75005004	75044641	-	2542	1	Chic2
NR_046045	NR_046045	74283	chr12	82932520	82939155	-	1079	1	1700085C21Rik
NR_046050	NR_046050	74314	chr7	135191765	135196002	-	880	1	1700120G07Rik
NM_028863	NM_028863	74316	chr12	84773270	84775089	+	862	1	Isca2
NM_183104	NM_183104	74361	chr9	46303361	46319986	-	2022	1	4931429L15Rik
NM_028905	NM_028905	74387	chr16	91053935	91069145	-	2679	1	4932438H23Rik
NR_029443	NR_029443	74396	chrX	75725458	75764699	-	3367	1	4933407K13Rik
NM_001256158	NM_001256158	74426	chr1	63754909	63769267	-	1751	1	4933402D24Rik
NR_046060	NR_046060	74429	chr5	35361553	35367677	+	2056	1	4930478P22Rik
NM_028957	NM_028957	74468	chr6	24857997	24891958	+	2064	1	Hyal5
NR_015591	NR_015591	74487	chr2	156852403	156862945	-	1506	1	5430405H02Rik
NM_028974	NM_028974	74492	chr9	65388684	65391652	-	2967	1	Kbtbd13
NM_178390	NM_178390	74504	chr5	33600353	33629635	-	1995	1	Fam53a
NM_028977	NM_028977	74511	chr5	21543527	21575902	+	2182	1	Lrrc17
NM_028993	NM_028993	74549	chr8	70016123	70042734	-	5348	1	Mau2
NM_028995	NM_028995	74552	chr4	135448901	135494504	-	5011	1	Nipal3
NM_029004	NM_029004	74563	chr11	49901835	49980223	+	2228	1	Rasgef1c
NM_133906	NM_133906	74570	chr5	138085084	138107822	+	8253	1	Zkscan1
NM_029011	NM_029011	74580	chr19	42725858	42752775	-	3101	1	Pyroxd2
NR_015506	NR_015506	74597	chr17	87274886	87282814	-	1525	1	4833418N02Rik
NR_040694	NR_040694	74627	chr5	118952339	118961261	+	1285	1	4930413E15Rik
NM_029044	NM_029044	74665	chr11	60353380	60394333	+	1842	1	Lrrc48
NM_001025373	NM_001025373	74670	chr17	21962559	21994366	+	2728	1	Zfp943
NM_029053	NM_029053	74685	chr16	17544465	17561247	-	2220	1	Lrrc74b
NM_029095	NM_029095	74770	chr9	121784016	121792507	-	1856	1	Hhatl
NM_029102	NM_029102	74782	chr10	82650433	82690650	-	2141	1	Glt8d2
NM_053089	NM_053089	74838	chr3	51416016	51475985	+	6068	1	Naa15
NM_001191051	NM_001191051	75099	chr7	67222616	67228468	+	3306	1	Lysmd4
NR_040597	NR_040597	75149	chr3	9061964	9071076	+	845	1	4930539M17Rik
NR_040565	NR_040565	75175	chr16	38017323	38054526	+	950	1	4930542C21Rik
NR_040600	NR_040600	75208	chr3	134404143	134423635	-	961	1	4930539C22Rik
NM_029227	NM_029227	75266	chr12	71111428	71123222	+	589	1	Tomm20l
NM_029228	NM_029228	75269	chr3	105066844	105078806	+	730	1	4930564D02Rik
NM_001270988	NM_001270988	75302	chr12	3426857	3506849	+	9019	1	Asxl2
NM_001163728	NM_001163728	75304	chr11	72215138	72218450	+	3310	1	4930563E22Rik
NR_028401	NR_028401	75316	chr9	15306214	15316997	+	1277	1	Taf1d
NM_183293	NM_183293	75338	chr7	90223878	90265432	-	1386	1	Ccdc83
NR_045714	NR_045714	75349	chr14	61492688	61500382	+	674	1	4930556J02Rik
NM_001172091	NM_001172091	75462	chr17	47412734	47414711	-	1336	1	1700001C19Rik
NM_029300	NM_029300	75470	chr9	106514573	106516003	+	540	1	Iqcf5
NM_029305	NM_029305	75480	chr2	154548904	154550048	+	728	1	1700003F12Rik
NM_029308	NM_029308	75485	chr2	173719415	173722086	+	891	1	1700010B08Rik
NM_029324	NM_029324	75524	chr4	63607091	63622429	-	664	1	1700018C11Rik
NM_080637	NM_080637	75533	chr18	34562641	34579106	-	821	1	Nme5
NM_029345	NM_029345	75573	chr11	106374826	106377114	+	781	1	Prr29
NM_001102468	NM_001102468	75600	chr9	62858104	62875917	+	713	1	Calml4
NM_023788	NM_023788	75625	chrX	153036166	153037563	-	1395	1	Mageh1
[truncated: 896 more rows]
